# Supplementary material for: circHIPK3 nucleates IGF2BP2 and functions as a competing endogenous RNA
Source: bioRxiv preprint, doi:10.1101/2023.09.14.557527, version 4 (2024-06-03)
Supplement: Supplementary Table S6 [file 557527_file08.xlsx]

## Sheet: Sheet 1
J82_circHIPK3_KD 1
tracking_id	Gene	chr	start	end	strand	size	sumReads	max	median	mean	Cosmic_gene	scr_12_scr_0_baseMean	scr_12_scr_0_FC	scr_12_scr_0_pval	scr_12_scr_0_padj	scr_24_scr_0_baseMean	scr_24_scr_0_FC	scr_24_scr_0_pval	scr_24_scr_0_padj	scr_48_scr_0_baseMean	scr_48_scr_0_FC	scr_48_scr_0_pval	scr_48_scr_0_padj	scr_72_scr_0_baseMean	scr_72_scr_0_FC	scr_72_scr_0_pval	scr_72_scr_0_padj	HIPK3_12_scr_0_baseMean	HIPK3_12_scr_0_FC	HIPK3_12_scr_0_pval	HIPK3_12_scr_0_padj	HIPK3_24_scr_0_baseMean	HIPK3_24_scr_0_FC	HIPK3_24_scr_0_pval	HIPK3_24_scr_0_padj	HIPK3_48_scr_0_baseMean	HIPK3_48_scr_0_FC	HIPK3_48_scr_0_pval	HIPK3_48_scr_0_padj	HIPK3_72_scr_0_baseMean	HIPK3_72_scr_0_FC	HIPK3_72_scr_0_pval	HIPK3_72_scr_0_padj	HIPK3_12_scr_12_baseMean	HIPK3_12_scr_12_FC	HIPK3_12_scr_12_pval	HIPK3_12_scr_12_padj	HIPK3_24_scr_24_baseMean	HIPK3_24_scr_24_FC
ENSG00000187634.6	SAMD11	chr1	860260	879955	+	19695	389	33	14	14.4074074074074	FALSE	14.1922024516535	0.112810702358486	0.779733070917426	0.899598554683491	14.1922024516535	-0.81045013661251	0.0631319271268218	0.217691231838936	14.1922024516535	-0.441867253549378	0.295792237648703	0.438214375416201	14.1922024516535	-1.89262855158858	0.000109735636361859	0.000653121811595095	14.1922024516535	-0.105908818415818	0.797535248200058	0.925665911116211	14.1922024516535	-1.00163943836514	0.0254713051983912	0.101451375164906	14.1922024516535	-1.00300925495813	0.0241908970521116	0.0691413030572737	14.1922024516535	-3.95920861938514	1.07940272127759e-06	1.33960510911629e-05	14.1922024516535	-0.218719520774304	0.591479736650255	NA	14.1922024516535	-0.191189301752627
ENSG00000188976.6	NOC2L	chr1	879584	894689	-	15105	2360	118	89	87.4074074074074	FALSE	85.9951026764425	-0.000735102654931436	0.996524865598369	0.999027402365989	85.9951026764425	0.0215008305738572	0.899431357983025	0.953399385308023	85.9951026764425	-0.221585024870307	0.203720527074163	0.333750111279686	85.9951026764425	-0.265756755763531	0.123203912883876	0.22438818812997	85.9951026764425	0.0140085207509234	0.934654101973898	0.97890658189922	85.9951026764425	-0.00566541887906	0.973676443932773	0.986269622418549	85.9951026764425	-0.115581516903302	0.502414307553839	0.650800830853021	85.9951026764425	-0.356007528675082	0.0469412543773593	0.110116152691979	85.9951026764425	0.0147436234058549	0.930598559847112	0.998625307316004	85.9951026764425	-0.0271662494529172
ENSG00000187583.6	PLEKHN1	chr1	901877	911245	+	9368	594	43	21	22	FALSE	21.5568710846251	-0.672121814502031	0.0435905011355865	0.215555440746473	21.5568710846251	-0.809984064046032	0.0175880660184963	0.0961178072818932	21.5568710846251	-0.872917609975811	0.0111602417271128	0.0348086725121533	21.5568710846251	-1.02784160811608	0.00279785114408428	0.0105884605052525	21.5568710846251	-0.265890884306534	0.414922029457892	0.704028480764335	21.5568710846251	-0.701800962015631	0.0390121876170811	0.135039181725128	21.5568710846251	-1.26406949431326	0.000432347484680177	0.00265871262897443	21.5568710846251	-1.32742741500931	0.000318662315203975	0.00189660638506532	21.5568710846251	0.406230930195497	0.232157649487572	NA	21.5568710846251	0.108183102030401
ENSG00000188290.6	HES4	chr1	934342	935552	-	1210	970	63	32	35.9259259259259	FALSE	35.024871041403	-0.38051426838718	0.245140274095213	0.528464633426808	35.024871041403	-0.213849601928422	0.512482098400702	0.732376314954751	35.024871041403	-0.404340253028716	0.22144788145827	0.353791059805499	35.024871041403	0.163159915827116	0.607645798927062	0.725744700170144	35.024871041403	-0.20431345625772	0.532070382545566	0.787471255712842	35.024871041403	-0.610638804127526	0.07002962750033	0.199385860290911	35.024871041403	-0.637675141054646	0.0577728323975518	0.136498109195598	35.024871041403	-0.815808650899292	0.0179299726037494	0.0523065451598545	35.024871041403	0.17620081212946	0.595494805522038	NA	35.024871041403	-0.396789202199105
ENSG00000187608.5	ISG15	chr1	948803	949920	+	1117	121396	7747	4326	4496.14814814815	FALSE	4384.28022102009	-0.321944988175285	0.0808915159480016	0.294108842354313	4384.28022102009	-0.482034001656137	0.00899061755755332	0.0610318010820617	4384.28022102009	-1.59730055226298	5.94722681207884e-18	4.93897733197501e-16	4384.28022102009	-0.148708609128677	0.419970301237495	0.560759744071582	4384.28022102009	0.0342574794736975	0.852614103947823	0.947633386826811	4384.28022102009	-0.755800174138957	4.24629298538244e-05	0.000900538412126691	4384.28022102009	-1.75042166332228	3.21033901453597e-21	4.60114072309139e-19	4384.28022102009	-0.604848149930791	0.00105050412811049	0.00515164441632992	4384.28022102009	0.356202467648982	0.0534510324872849	0.886180118215023	4384.28022102009	-0.27376617248282
ENSG00000078808.12	SDF4	chr1	1152288	1167411	-	15123	35311	1935	1271	1307.81481481481	FALSE	1287.15260858993	-0.413585702175855	0.00270345879193961	0.0436780633185007	1287.15260858993	-0.000861417187605558	0.995000111406812	0.997132174349941	1287.15260858993	0.117705420759402	0.391338391400774	0.538135708137926	1287.15260858993	0.148218422843856	0.279617084740663	0.414527429930852	1287.15260858993	-0.100932936322325	0.463361823201764	0.739747244155744	1287.15260858993	-0.204663327125771	0.137645966880859	0.308091199421488	1287.15260858993	0.078013372886549	0.570110771132643	0.707156797498596	1287.15260858993	0.0823308452687458	0.549371358478676	0.682852691487134	1287.15260858993	0.31265276585353	0.0235562052269036	0.741168121729367	1287.15260858993	-0.203801909938166
ENSG00000176022.3	B3GALT6	chr1	1167629	1170421	+	2792	6387	323	229	236.555555555556	FALSE	233.55851455417	0.0339629070423638	0.822256558332335	0.918339215046964	233.55851455417	0.21960249522094	0.145147032121757	0.359971121248656	233.55851455417	0.360281513289575	0.0161989648015954	0.0464181627920443	233.55851455417	0.442540124649927	0.00285752363951153	0.0107847870970961	233.55851455417	0.191523141944029	0.205172779419743	0.509194263371973	233.55851455417	0.267801470915986	0.0759039308822656	0.209988272048509	233.55851455417	0.344947980953877	0.0214138177038472	0.0630076768597305	233.55851455417	0.579826104858022	0.000101916106628084	0.000717043961597112	233.55851455417	0.157560234901665	0.293666974594468	0.998625307316004	233.55851455417	0.0481989756950458
ENSG00000160087.16	UBE2J2	chr1	1189289	1209265	-	19976	17717	1011	646	656.185185185185	FALSE	644.149927691822	-0.186341050123232	0.118630775322994	0.359446068393645	644.149927691822	0.179803314915853	0.129782728094436	0.337355211948824	644.149927691822	0.101906111106028	0.391506342410617	0.538283360461201	644.149927691822	-0.0542299630058626	0.648340043000141	0.756786487831282	644.149927691822	-0.0861916737360496	0.471085468795378	0.744586530721403	644.149927691822	-0.0700008587065461	0.558566173577928	0.733856299350837	644.149927691822	0.246152893244185	0.0378276962154115	0.0981421630861742	644.149927691822	-0.0635142749610507	0.596157534980106	0.720555401734798	644.149927691822	0.100149376387182	0.403287519932726	0.998625307316004	644.149927691822	-0.249804173622399
ENSG00000169972.7	PUSL1	chr1	1243947	1247057	+	3110	900	51	32	33.3333333333333	FALSE	33.0832086995649	-0.0611775878645943	0.83862260480553	0.92627501506088	33.0832086995649	-0.0782821010086058	0.796519428533205	0.901412415878835	33.0832086995649	0.393862735143877	0.179892766618035	0.303902495088946	33.0832086995649	-0.414029117747352	0.179807785328601	0.299333110404802	33.0832086995649	-0.12423266412222	0.684511283576331	0.871762268087535	33.0832086995649	0.00103499775459778	0.997278488246672	0.998402055718784	33.0832086995649	0.251253079257355	0.396515592152902	0.550537117479795	33.0832086995649	-0.250396291953511	0.42230983876742	0.570832433328967	33.0832086995649	-0.063055076257626	0.836035931635245	NA	33.0832086995649	0.0793170987632036
ENSG00000127054.14	CPSF3L	chr1	1246965	1260071	-	13106	2849	143	104	105.518518518519	FALSE	103.635478973459	-0.0422187168866133	0.782642867448673	0.900601819613159	103.635478973459	-0.0117965336837986	0.93904057300117	0.971807290747922	103.635478973459	0.077790543108118	0.611610830289609	0.730578550605387	103.635478973459	-5.87808035545661e-05	0.9996915737634	0.9996915737634	103.635478973459	0.0258839768360668	0.866795592936481	0.953230959480739	103.635478973459	0.184582202119139	0.22611924334237	0.425247745257207	103.635478973459	0.022023076390015	0.886145765915002	0.93618966542869	103.635478973459	-0.181299563894764	0.255327710498687	0.396789443072986	103.635478973459	0.0681026937226801	0.657000025627839	0.998625307316004	103.635478973459	0.196378735802938
ENSG00000224051.2	GLTPD1	chr1	1260136	1264277	+	4141	2569	149	88	95.1481481481482	FALSE	93.6987535360592	-0.12996688729892	0.572891523263994	0.783548418612259	93.6987535360592	0.181181993932918	0.427993648909076	0.665235536856053	93.6987535360592	0.24389370504782	0.284894962794133	0.426622285033479	93.6987535360592	-0.261598631630035	0.258885142599029	0.392301053399552	93.6987535360592	-0.192066643544179	0.40993356382676	0.699682525932913	93.6987535360592	0.0534853927479893	0.816592649011725	0.903979354568106	93.6987535360592	0.00100807753724933	0.996510961504482	0.997858508443636	93.6987535360592	-0.134898187336321	0.563630118557365	0.69399440183078	93.6987535360592	-0.0620997562452586	0.790097231038856	0.998625307316004	93.6987535360592	-0.127696601184929
ENSG00000107404.13	DVL1	chr1	1270656	1284730	-	14074	6580	351	242	243.703703703704	FALSE	239.546555852376	0.000553174231037089	0.996999513883129	0.999027402365989	239.546555852376	0.202440788199466	0.167375948626303	0.390879609279564	239.546555852376	0.127956542036423	0.38449417048171	0.530777567018872	239.546555852376	0.100732200123469	0.491182507683803	0.626564421946349	239.546555852376	0.126934184360424	0.38877596653482	0.685313080465862	239.546555852376	-0.0811317272561871	0.586058153127766	0.756275449999031	239.546555852376	-0.209189064181829	0.161749725062977	0.296352176682395	239.546555852376	-0.171812776589142	0.252637147310526	0.393778931941998	239.546555852376	0.126381010129387	0.388484275531028	0.998625307316004	239.546555852376	-0.283572515455653
ENSG00000175756.9	AURKAIP1	chr1	1309110	1310875	-	1765	12822	833	428	474.888888888889	FALSE	465.187944906434	-0.306293184195793	0.0149979090053461	0.119560230038043	465.187944906434	-0.49963582526287	8.46500164007983e-05	0.00198469669060025	465.187944906434	-0.759793478701176	3.18492922515176e-09	6.73840026064252e-08	465.187944906434	-0.784218755402805	8.10143626476954e-10	1.48738352580046e-08	465.187944906434	-0.48087505550323	0.000155529031174373	0.00674161449275842	465.187944906434	-0.549238878555201	1.67404660763757e-05	0.000436449940025631	465.187944906434	-0.551629174259696	1.48317739333088e-05	0.000157649692788735	465.187944906434	-0.585112737048134	4.88082027385977e-06	5.14483617479453e-05	465.187944906434	-0.174581871307437	0.171728201111152	0.985126099538007	465.187944906434	-0.0496030532923306
ENSG00000221978.7	CCNL2	chr1	1321091	1334708	-	13617	9728	530	359	360.296296296296	FALSE	355.219241356238	0.21292646133933	0.130580506423038	0.382949960420829	355.219241356238	0.238256341839528	0.0918604252096792	0.274746461936456	355.219241356238	0.728734984802656	1.65206591086398e-07	2.3870337697459e-06	355.219241356238	0.393874403457446	0.00487097130602279	0.0169208174453943	355.219241356238	0.229906777930024	0.10430805106972	0.361286104501756	355.219241356238	0.44509635839405	0.00155336481594515	0.0142447881883267	355.219241356238	0.467505590628953	0.000860931601455775	0.00472494423328405	355.219241356238	0.287193873346369	0.0427674027840107	0.102406666973516	355.219241356238	0.0169803165906942	0.903314726799952	0.998625307316004	355.219241356238	0.206840016554522
ENSG00000224870.3	RP4-758J18.2	chr1	1334902	1337426	+	2524	2866	150	98	106.148148148148	FALSE	104.910062558545	0.50429318799879	0.014496263829985	0.116890925946685	104.910062558545	0.158837480401343	0.452629615908107	0.686828341352362	104.910062558545	0.673019594878251	0.0010829628433227	0.00522149095266714	104.910062558545	0.401029593393118	0.0527276404636435	0.116667782161339	104.910062558545	0.434705175433549	0.0371686662012356	0.20890624153332	104.910062558545	0.647295195759549	0.00174327522210916	0.0156314264618183	104.910062558545	0.467608131724016	0.0245464216912251	0.0699325114293768	104.910062558545	0.366894060530996	0.0813955138914567	0.168361391163753	104.910062558545	-0.0695880125652408	0.729454888785318	0.998625307316004	104.910062558545	0.488457715358206
ENSG00000242485.1	MRPL20	chr1	1337288	1342693	-	5405	17897	887	632	662.851851851852	FALSE	653.559155321995	0.0322526292317861	0.773645593212036	0.896416057019449	653.559155321995	-0.00565668900048734	0.959963072651069	0.98222740645196	653.559155321995	0.299796985076666	0.00729806894284381	0.0248089673397514	653.559155321995	0.0653863350111475	0.559185236355327	0.683834018681302	653.559155321995	-0.10414878105219	0.357304296653388	0.659174973902761	653.559155321995	0.262129033771684	0.0192895108391662	0.0845200164284177	653.559155321995	0.133263005292519	0.235165580672055	0.38462752620134	653.559155321995	0.0147179621396286	0.896426706199548	0.937245289009199	653.559155321995	-0.136401410283976	0.226053802548692	0.998625307316004	653.559155321995	0.267785722772172
ENSG00000160072.15	ATAD3B	chr1	1407143	1433228	+	26085	2138	142	78	79.1851851851852	FALSE	78.2924410834503	-0.911512991201149	0.000137072209564707	0.00654851426984937	78.2924410834503	-0.2770328154648	0.232508933444672	0.474632295563831	78.2924410834503	-0.716988103065318	0.00259696974124024	0.0108290347821027	78.2924410834503	-0.903115024166365	0.000152303956037821	0.000870896366378429	78.2924410834503	0.0602163954660422	0.792434706409219	0.922880052575664	78.2924410834503	-0.572246156131788	0.0156512495389476	0.073780903662116	78.2924410834503	-0.715992095236863	0.00262397011880169	0.0118962237120775	78.2924410834503	-0.526178157799898	0.026405725008103	0.0704416909102382	78.2924410834503	0.971729386667191	4.74584205535013e-05	0.0404464389167215	78.2924410834503	-0.295213340666987
ENSG00000197785.9	ATAD3A	chr1	1447531	1470067	+	22536	8289	631	269	307	FALSE	301.089150959554	-0.679997134675313	0.00031665790852124	0.0108641782823156	301.089150959554	-0.525281524416933	0.00538016525169788	0.0427239932319816	301.089150959554	-1.09025597926011	1.22235100820262e-08	2.28189307959842e-07	301.089150959554	-1.19268286481374	4.30607814703594e-10	8.35454375863786e-09	301.089150959554	-0.297497912992277	0.113544563713259	0.378519176119444	301.089150959554	-0.793401991000077	3.0129720310382e-05	0.000682991568056261	301.089150959554	-0.961676648107798	4.59499541516478e-07	7.27827616027705e-06	301.089150959554	-0.886658938360118	3.41634455668115e-06	3.78052773731864e-05	301.089150959554	0.382499221683036	0.0439098638753269	0.854367383147873	301.089150959554	-0.268120466583144
ENSG00000160075.10	SSU72	chr1	1477053	1510249	-	33196	6252	325	229	231.555555555556	FALSE	226.986423165937	-0.0113736745251028	0.921912944988442	0.963325309168308	226.986423165937	-0.108045102726804	0.359358861372402	0.606622880348626	226.986423165937	-0.0433214928489467	0.712179340735008	0.809365087833647	226.986423165937	0.0267320758340135	0.816983909443114	0.879859292123563	226.986423165937	-0.185155433971789	0.119652396549509	0.388465910025186	226.986423165937	-0.192037631318187	0.107726214211118	0.262982181175822	226.986423165937	-0.0301910464841951	0.796774208443368	0.877014197476498	226.986423165937	0.0125150092424494	0.915549438822831	0.949529915193707	226.986423165937	-0.173781759446686	0.141423274378206	0.975431061423351	226.986423165937	-0.0839925285913827
ENSG00000197530.8	MIB2	chr1	1550795	1565990	+	15195	775	59	27	28.7037037037037	FALSE	28.1678851645713	-0.631445846439564	0.0344536679360491	0.19450781021584	28.1678851645713	-0.0608101034407505	0.831723223333519	0.921478603085415	28.1678851645713	-0.370412206571434	0.208794477023585	0.339186903103536	28.1678851645713	-0.475484695228089	0.104850703450546	0.198742182351013	28.1678851645713	-0.252365749039058	0.387532211644756	0.684478479959312	28.1678851645713	-0.763184123145027	0.013686093405209	0.0673019512997714	28.1678851645713	-0.555655881146859	0.0639165671220587	0.147064374791977	28.1678851645713	-0.42994893256285	0.15214235819586	0.27071225369011	28.1678851645713	0.379080097400506	0.214997982290115	NA	28.1678851645713	-0.702374019704277
ENSG00000189339.7	SLC35E2B	chr1	1592939	1624167	-	31228	4900	329	172	181.481481481481	FALSE	178.602180983594	0.0601670478405871	0.733104704162346	0.876601275166932	178.602180983594	0.454313865404551	0.00914859776980074	0.0617269854080861	178.602180983594	0.914713126003708	9.57559373071922e-08	1.45450813489181e-06	178.602180983594	0.327010761102754	0.0603759253451367	0.129329629737713	178.602180983594	0.0467740367156825	0.792704023779154	0.923072723797873	178.602180983594	0.404026062526734	0.0210994387301147	0.089665046655093	178.602180983594	0.490755799825846	0.00482131656518931	0.019544807937168	178.602180983594	0.389959007412138	0.0265369720132614	0.0707069065396824	178.602180983594	-0.0133930111249046	0.939488485364752	0.998625307316004	178.602180983594	-0.0502878028778169
ENSG00000008130.11	NADK	chr1	1682671	1711896	-	29225	1578	86	58	58.4444444444444	FALSE	57.567231614978	0.024033315057249	0.909774380529813	0.95682981955118	57.567231614978	0.176964790431998	0.4023051217441	0.643891086422564	57.567231614978	0.330103477779508	0.113828219301892	0.215620881841103	57.567231614978	0.290449565889383	0.159972024988518	0.274792775808724	57.567231614978	-0.00191472679109423	0.992924056382956	0.996744624808811	57.567231614978	0.287136228002023	0.17279838853999	0.358258252479842	57.567231614978	0.10758915525513	0.613069902174895	0.742382369606446	57.567231614978	0.318163853047514	0.132087201107725	0.243643665645967	57.567231614978	-0.0259480418483432	0.903123557738252	0.998625307316004	57.567231614978	0.110171437570025
ENSG00000078369.13	GNB1	chr1	1716729	1822495	-	105766	25099	1300	915	929.592592592593	FALSE	911.397466592734	-0.0831724090854514	0.276461781004232	0.562031431252255	911.397466592734	-0.0965304049569033	0.209191331156959	0.445452712355797	911.397466592734	-0.0763872312373439	0.320111777924306	0.464258733252062	911.397466592734	-0.223677941091382	0.00357880670976061	0.0130600724529498	911.397466592734	-0.231214878710472	0.00283518962352258	0.0445545033570211	911.397466592734	-0.0703206836819507	0.361164917754366	0.573398509766892	911.397466592734	-0.059033314620615	0.441929250832764	0.593468841302696	911.397466592734	-0.240857744329583	0.0019819720513047	0.00873601371423294	911.397466592734	-0.14804246962502	0.0556972002914673	0.886180118215023	911.397466592734	0.0262097212749526
ENSG00000067606.11	PRKCZ	chr1	1981909	2116834	+	134925	1169	63	41	43.2962962962963	FALSE	42.4738064154904	-0.178568660432423	0.461053643763198	0.710654410837776	42.4738064154904	-0.157162564077933	0.52043774340022	0.738519608408552	42.4738064154904	0.322003308758128	0.168976083782126	0.289813063209414	42.4738064154904	0.266589272671103	0.250770496710194	0.383800660311192	42.4738064154904	0.115674822141531	0.628344022050513	0.841476795242749	42.4738064154904	-0.0286822425685998	0.906121702614596	0.952868996749994	42.4738064154904	-0.0375447452628325	0.876533647484759	0.929793242395794	42.4738064154904	-0.133641788023617	0.589553145555828	0.715397345367231	42.4738064154904	0.294243482573953	0.221525018399443	NA	42.4738064154904	0.128480321509333
ENSG00000162585.12	C1orf86	chr1	2115903	2144159	-	28256	3308	194	114	122.518518518519	FALSE	120.444894620139	0.0954431612396032	0.552729790885661	0.770561173801377	120.444894620139	0.233341060943143	0.145941320859461	0.360833215680904	120.444894620139	0.746450492082648	1.45526508804378e-06	1.71732876126919e-05	120.444894620139	0.225212609882548	0.156144306944691	0.270046382154637	120.444894620139	0.197669553495057	0.220888797279956	0.525379510875184	120.444894620139	0.352475410325415	0.0274998881768741	0.106688922932815	120.444894620139	0.615692354505153	8.06273399267983e-05	0.000665849946644544	120.444894620139	0.0896794909415776	0.58551318608278	0.711941731189324	120.444894620139	0.102226392255454	0.519210150227532	0.998625307316004	120.444894620139	0.119134349382272
ENSG00000157933.9	SKI	chr1	2160134	2241558	+	81424	2239	146	83	82.9259259259259	FALSE	81.2879949791909	-0.156966983978582	0.526003140777079	0.753604929043476	81.2879949791909	-0.127498022126647	0.60799394717975	0.798499510985215	81.2879949791909	-0.356924591138202	0.155761813492577	0.272460526514771	81.2879949791909	-0.298974859623097	0.229459742162493	0.358785723888071	81.2879949791909	-0.00999487217096248	0.967803491646768	0.987717824649869	81.2879949791909	-0.501717733721003	0.0484820257352557	0.155359279005944	81.2879949791909	-0.087840075999153	0.723430310902205	0.825773282015093	81.2879949791909	-0.45408845784432	0.0743706916338001	0.157409527374301	81.2879949791909	0.146972111807619	0.553586113272308	0.998625307316004	81.2879949791909	-0.374219711594356
ENSG00000157916.14	RER1	chr1	2323267	2336883	+	13616	18935	1125	689	701.296296296296	FALSE	690.488958352598	-0.0266020863332677	0.869235653034797	0.938977390331535	690.488958352598	0.250319575516677	0.120735167577146	0.322081266613786	690.488958352598	-0.482831044135595	0.00305337766549169	0.0122383012790073	690.488958352598	-0.497727310771233	0.00220355859457633	0.00864113930776931	690.488958352598	0.0922545531890261	0.568220503157862	0.808649486076355	690.488958352598	-0.261627561831706	0.107499619721147	0.262645482772095	690.488958352598	0.247929104064972	0.124375048868267	0.243813284060714	690.488958352598	-0.0611539467681509	0.706152580604871	0.80674618555604	690.488958352598	0.118856639522294	0.461722827525538	0.998625307316004	690.488958352598	-0.511947137348383
ENSG00000157911.5	PEX10	chr1	2336236	2345236	-	9000	1915	113	70	70.9259259259259	FALSE	69.9719295983269	0.058060465598607	0.791244391819721	0.904633655136916	69.9719295983269	0.252773782415134	0.246518530693281	0.491929859362339	69.9719295983269	0.532151992542802	0.0130333864040339	0.0394329831754326	69.9719295983269	0.238244462371572	0.270417752503889	0.40518760968848	69.9719295983269	0.221427276689986	0.312453899608522	0.620436568970483	69.9719295983269	0.198134959764378	0.368167527581004	0.57944326073057	69.9719295983269	0.28607250346391	0.188850599247042	0.331399409555593	69.9719295983269	0.353037482417754	0.106433966479172	0.20672616964676	69.9719295983269	0.163366811091379	0.450115183642826	0.998625307316004	69.9719295983269	-0.0546388226507563
ENSG00000157873.13	TNFRSF14	chr1	2487078	2496821	+	9743	2030	160	69	75.1851851851852	TRUE	73.6068514799684	0.391315078720388	0.0396934040309785	0.206392292704701	73.6068514799684	0.236996829625621	0.224086055243484	0.463976278255409	73.6068514799684	-0.0463708092329844	0.817773247680566	0.884138347595754	73.6068514799684	1.26030383634729	1.93792213859948e-12	5.60924303700163e-11	73.6068514799684	0.664335869861857	0.000421389563993451	0.0128658040312312	73.6068514799684	0.0154515334895733	0.938766962054912	0.96843733772297	73.6068514799684	-0.479318180853072	0.0236481771650648	0.0679837276896686	73.6068514799684	1.06206472454122	8.20380545606181e-09	1.7274648171224e-07	73.6068514799684	0.27302079114147	0.12583187655227	0.975431061423351	73.6068514799684	-0.221545296136048
ENSG00000157870.10	FAM213B	chr1	2517930	2522908	+	4978	1345	87	50	49.8148148148148	FALSE	48.5266647611415	0.0701624636778048	0.729929839284104	0.875859094983077	48.5266647611415	-0.319722226243268	0.133083870422936	0.341984752046908	48.5266647611415	-0.719225174528791	0.00127857050762953	0.00600161665179316	48.5266647611415	-0.379773753662532	0.0720584975281428	0.148323328476969	48.5266647611415	-0.122719095344689	0.558186875007009	0.803637163206786	48.5266647611415	-0.393454442773057	0.0689107248190734	0.197401902238003	48.5266647611415	-0.86006281523685	0.000150067516737797	0.0011121767754229	48.5266647611415	-1.0103749030312	1.92513837691073e-05	0.000171927433338983	48.5266647611415	-0.192881559022493	0.350395593617211	NA	48.5266647611415	-0.0737322165297894
ENSG00000130762.10	ARHGEF16	chr1	3370990	3397677	+	26687	466	37	18	17.2592592592593	FALSE	17.0197143493235	-0.100280164211749	0.823750740485138	0.918894162168913	17.0197143493235	0.1837538241916	0.680016798539977	0.840095928038266	17.0197143493235	-0.742063092688552	0.12229540489488	0.227727780363768	17.0197143493235	0.246676488596624	0.575165294943412	0.698022235846375	17.0197143493235	0.435465373262865	0.32231397957067	0.628381319857073	17.0197143493235	-0.0523675440121184	0.908321459692852	0.953834139781456	17.0197143493235	-0.998305933015936	0.042804024545589	0.10805584150912	17.0197143493235	0.252504161575274	0.572422326785255	0.701398896278789	17.0197143493235	0.535745537474614	0.223066732998751	NA	17.0197143493235	-0.236121368203718
ENSG00000158109.10	TPRG1L	chr1	3541566	3546691	+	5125	11624	689	391	430.518518518519	FALSE	419.672720062032	0.222928082312434	0.0756929887148364	0.285895906173306	419.672720062032	0.54004346300486	1.46997504338684e-05	0.000496661529868267	419.672720062032	0.730534562151982	3.71182229064133e-09	7.68840393348225e-08	419.672720062032	0.824999617264008	1.97799716399816e-11	4.92338453761559e-10	419.672720062032	0.159730693737234	0.207229915124725	0.511370459816248	419.672720062032	0.2851012346251	0.0238361506874286	0.097517511514038	419.672720062032	0.523321477976731	2.72599470806934e-05	0.000261872313253018	419.672720062032	0.511872783870156	4.42365681222216e-05	0.000351597624627962	419.672720062032	-0.0631973885752003	0.6126545386222	0.998625307316004	419.672720062032	-0.25494222837976
ENSG00000116213.11	WRAP73	chr1	3547331	3569325	-	21994	3164	165	113	117.185185185185	FALSE	115.731072421629	0.223085310701426	0.312999901944543	0.595316166241269	115.731072421629	0.181136535443391	0.415642105195162	0.655249366894978	115.731072421629	-0.287787254993628	0.205948213688956	0.336160144533442	115.731072421629	0.192329716140924	0.384429220582245	0.525463475479746	115.731072421629	0.534297394301614	0.0151168253708777	0.123943598185371	115.731072421629	0.141534590692831	0.526589052147799	0.710262611933209	115.731072421629	-0.0110719338413336	0.960654990749565	0.977202973971847	115.731072421629	0.00636213928068006	0.977494427448685	0.98690513454269	115.731072421629	0.311212083600188	0.151254549914347	0.975431061423351	115.731072421629	-0.0396019447505599
ENSG00000130764.5	LRRC47	chr1	3696784	3713068	-	16284	20988	1118	788	777.333333333333	FALSE	761.838476738738	-0.337459581810906	0.00303475165113579	0.0479836355373534	761.838476738738	-0.240165002447005	0.0350269647675262	0.150144529148209	761.838476738738	-0.19977276097513	0.0792735861029682	0.163373305363061	761.838476738738	-0.312294436055102	0.00602462198727205	0.0201713605798416	761.838476738738	-0.329527550462829	0.00392214883884427	0.0546011237485029	761.838476738738	-0.4492085724376	9.01520446071439e-05	0.00163155003743194	761.838476738738	-0.511138226318259	8.4012319903476e-06	9.57217728858376e-05	761.838476738738	-0.461393853972152	5.97731985576474e-05	0.000452037993517664	761.838476738738	0.00793203134807724	0.944906576305568	0.998625307316004	761.838476738738	-0.209043569990596
ENSG00000116198.8	CEP104	chr1	3728645	3773778	-	45133	1891	94	71	70.037037037037	FALSE	68.7707698652718	0.433982588018855	0.0352152472147124	0.196530181086582	68.7707698652718	0.430990978577867	0.0381528734010225	0.158193036622448	68.7707698652718	0.462898988314829	0.0257852165137528	0.0673706068630424	68.7707698652718	0.390446513797538	0.0584343345517395	0.12593924249982	68.7707698652718	0.279243621963825	0.185810915243584	0.486116196125491	68.7707698652718	0.441308459911104	0.0346314512394439	0.124237010784699	68.7707698652718	0.165185898480695	0.436895401717421	0.5878638006755	68.7707698652718	0.433746705793948	0.0389537796581008	0.0953562771465245	68.7707698652718	-0.154738966055029	0.442511752561564	0.998625307316004	68.7707698652718	0.0103174813332372
ENSG00000169598.11	DFFB	chr1	3773845	3801993	+	28148	1366	82	52	50.5925925925926	FALSE	49.59302070085	1.25270847453352	0.00506669120686989	0.0649904328726122	49.59302070085	1.33222849254499	0.00290431989940678	0.0273365547693789	49.59302070085	0.788553039587857	0.0820897904958368	0.167586303327216	49.59302070085	1.41724443759603	0.00146050704175246	0.00606168406025801	49.59302070085	1.34694207050823	0.00261381312425044	0.0427892089407238	49.59302070085	1.2647210446527	0.0048206197399529	0.0327194151669914	49.59302070085	0.956847536911831	0.0340479685229421	0.090232701549318	49.59302070085	1.07696223481675	0.0170392717155089	0.0502208971042917	49.59302070085	0.0942335959747064	0.825243542357256	NA	49.59302070085	-0.0675074478922934
ENSG00000198912.6	C1orf174	chr1	3805689	3816857	-	11168	3927	212	145	145.444444444444	FALSE	142.441635711785	0.624232804530304	0.100011540097891	0.327620810072649	142.441635711785	0.549524189701781	0.148437583756469	0.364772226012163	142.441635711785	-0.176897473119226	0.645017476029124	0.757350065009883	142.441635711785	0.443550739839152	0.243195394550215	0.375244708451677	142.441635711785	0.562211585659659	0.139336272147963	0.417549507944181	142.441635711785	0.379511726846646	0.319536620882789	0.531027195280431	142.441635711785	0.372931403257246	0.327737398775182	0.483686185935271	142.441635711785	0.348650465478204	0.361006994067988	0.511383412926533	142.441635711785	-0.0620212188706447	0.869339063838654	0.998625307316004	142.441635711785	-0.170012462855135
ENSG00000131697.13	NPHP4	chr1	5922871	6052533	-	129662	920	51	34	34.0740740740741	FALSE	33.6644557173204	0.357137064299364	0.214818904955814	0.49470235571776	33.6644557173204	0.339169299185231	0.243686578489786	0.488803371661454	33.6644557173204	0.204409345262998	0.487838073859677	0.628793119798361	33.6644557173204	0.238233338280399	0.411303471835902	0.552926270912833	33.6644557173204	0.531191777542692	0.0646661632916263	0.279758289683248	33.6644557173204	0.158219929776043	0.594710601039286	0.762568311808816	33.6644557173204	0.327233279225586	0.261335351892311	0.411961315755734	33.6644557173204	0.381691448738455	0.193038118555068	0.323526352599082	33.6644557173204	0.174054713243328	0.527321915675519	NA	33.6644557173204	-0.180949369409188
ENSG00000069424.10	KCNAB2	chr1	6051526	6161253	+	109727	1869	94	68	69.2222222222222	FALSE	68.0665161974371	0.568476660457623	0.00697861145313949	0.0783968917479109	68.0665161974371	0.248213446860039	0.254012066645211	0.499812051419253	68.0665161974371	0.363463548496713	0.0922478650119543	0.183998771828558	68.0665161974371	0.634170882606884	0.00246559045131099	0.00950922067073833	68.0665161974371	0.331130163120619	0.126743671121817	0.400086771434622	68.0665161974371	0.355525661185733	0.101361887426155	0.252551595936627	68.0665161974371	0.411217051323956	0.0556975829926466	0.132973864178576	68.0665161974371	0.697218862827427	0.00103415183612001	0.00508267323880665	68.0665161974371	-0.237346497337003	0.246877902795469	0.998625307316004	68.0665161974371	0.107312214325694
ENSG00000116251.5	RPL22	chr1	6241329	6269449	-	28120	14056	941	486	520.592592592593	TRUE	510.37127047293	0.420132426980026	0.0483430514426417	0.226610062571874	510.37127047293	-0.153839547025943	0.472827044350625	0.702246551245136	510.37127047293	0.197896389354601	0.353891666664119	0.499235013490612	510.37127047293	0.0654442758377201	0.759092063778437	0.841995155167527	510.37127047293	-0.056597578621158	0.791513243292556	0.922347703409177	510.37127047293	0.142672987995898	0.504400612056247	0.692610636369079	510.37127047293	0.235071976574748	0.270660904221681	0.422242414837405	510.37127047293	0.18814114972675	0.378746813323193	0.528757923517658	510.37127047293	-0.476730005601184	0.0252383086716644	0.743856111891902	510.37127047293	0.296512535021841
ENSG00000116237.11	ICMT	chr1	6281253	6296032	-	14779	8401	443	308	311.148148148148	FALSE	305.806413858764	0.0818537260069785	0.506069011290798	0.742691504734181	305.806413858764	-0.0459457356641652	0.712194529822323	0.857180088311142	305.806413858764	-0.0980970872219198	0.432371739288709	0.57804722615957	305.806413858764	-0.280273174223205	0.0250450924811699	0.0645126023234422	305.806413858764	-0.0274389875529073	0.825745303537924	0.935849340789892	305.806413858764	0.068756423128669	0.580039079836967	0.751235572574157	305.806413858764	0.0120553628771399	0.922700031827067	0.95649115355313	305.806413858764	-0.213805459318831	0.0912524979254106	0.18399584673592	305.806413858764	-0.109292713559886	0.376342884341441	0.998625307316004	305.806413858764	0.114702158792834
ENSG00000097021.15	ACOT7	chr1	6324329	6454451	-	130122	5805	368	202	215	FALSE	210.481900920724	0.164275385650438	0.20891906726248	0.488669342378099	210.481900920724	-0.390532943907128	0.00395050081074018	0.0338190271717122	210.481900920724	-0.782974052510348	1.98816633590927e-08	3.54045011240276e-07	210.481900920724	-0.405859108829183	0.00252895045085983	0.00973246154453894	210.481900920724	-0.10485527809056	0.432159529575238	0.718323376774406	210.481900920724	-0.454537959335439	0.000885272846811974	0.0092113987315822	210.481900920724	-0.85918966666994	9.0460200936e-10	2.64417547867532e-08	210.481900920724	-0.55544257385349	5.94399083202716e-05	0.000450283909065587	210.481900920724	-0.269130663740998	0.0411654334413942	0.854367383147873	210.481900920724	-0.0640050154283111
ENSG00000162408.10	NOL9	chr1	6581407	6614595	-	33188	5444	342	196	201.62962962963	FALSE	197.759652350377	-0.48436584180711	0.00118772158551712	0.0254876758371156	197.759652350377	-0.311733943819671	0.0364693931405316	0.154159727747346	197.759652350377	-0.356678879370137	0.0170073157472153	0.0483606424735216	197.759652350377	-0.822672504729661	6.29784108432904e-08	8.25407313795691e-07	197.759652350377	-0.420325335308744	0.00511619735661669	0.0650243220310386	197.759652350377	-0.615421924694434	5.24725926250628e-05	0.00107435819830947	197.759652350377	-0.40372444592513	0.00703910336607442	0.0264368015684435	197.759652350377	-0.624574706569368	4.38889129759838e-05	0.000349459570523828	197.759652350377	0.0640405064983655	0.674813600654777	0.998625307316004	197.759652350377	-0.303687980874763
ENSG00000162413.12	KLHL21	chr1	6650784	6674667	-	23883	8672	550	282	321.185185185185	FALSE	313.70385176473	-0.190386391638105	0.282238378093908	0.566988119531866	313.70385176473	0.0591524762272705	0.737509855953092	0.870435991499425	313.70385176473	0.24416294627567	0.164742657307648	0.284087570897682	313.70385176473	0.472365363006483	0.0067567973648585	0.0222561607875626	313.70385176473	0.0594893849669696	0.736241448707378	0.898001583337941	313.70385176473	0.0780994653795575	0.658495958176056	0.804814770225064	313.70385176473	-0.0384519380030613	0.828004562404469	0.896399676111856	313.70385176473	0.000559497622555582	0.997482945974539	0.998814956815794	313.70385176473	0.249875776605074	0.157982884372656	0.980498542853125	313.70385176473	0.018946989152287
ENSG00000116273.5	PHF13	chr1	6673745	6684093	+	10348	4860	227	189	180	FALSE	178.121674359326	0.478111197310092	0.0046440846203606	0.0621496023140427	178.121674359326	0.399995113477463	0.0189501069072766	0.101196304073353	178.121674359326	0.530094104189323	0.00176444604246084	0.00785121058252732	178.121674359326	0.461209226185566	0.0062958886990454	0.0209445688713421	178.121674359326	0.485442097911819	0.00430349685132029	0.0577656692157584	178.121674359326	0.729641792515998	1.4848981992015e-05	0.000400317965577322	178.121674359326	0.465954052009157	0.00612581912997367	0.023778360470491	178.121674359326	0.595156616231025	0.000461321346926545	0.00258305071757359	178.121674359326	0.00733090060172724	0.964496028550912	0.998726332951763	178.121674359326	0.329646679038536
ENSG00000041988.11	THAP3	chr1	6684926	6695646	+	10720	4668	276	185	172.888888888889	FALSE	169.066302490387	-0.0859312409908192	0.613670274444931	0.808222033306308	169.066302490387	-0.188071343964279	0.274303183403664	0.52305967547746	169.066302490387	-0.180159795060251	0.295051189167191	0.437497390066913	169.066302490387	-0.210633573464319	0.217939926773139	0.344900122761552	169.066302490387	0.200993745179866	0.235051436139343	0.541526331743376	169.066302490387	-0.207383670541337	0.23014048445622	0.430005527848203	169.066302490387	-0.232935257112954	0.176911041099824	0.316113314138958	169.066302490387	-0.121650294877886	0.480925570142136	0.624607391827112	169.066302490387	0.286924986170685	0.0896922936319186	0.947515112468378	169.066302490387	-0.0193123265770578
ENSG00000007923.11	DNAJC11	chr1	6694228	6761984	-	67756	3528	188	127	130.666666666667	FALSE	128.813225744442	-0.188286437265856	0.254314311021323	0.536490673459709	128.813225744442	0.250065550579708	0.12151508010853	0.323597229152931	128.813225744442	0.342588756722187	0.0330050457801314	0.0821290497906042	128.813225744442	0.136131894636387	0.398262207714644	0.539101719985587	128.813225744442	0.0434181735604768	0.791483930667756	0.922347703409177	128.813225744442	0.243428334207278	0.133704785799657	0.302531312663427	128.813225744442	0.153402757092967	0.345461586208727	0.501765898276896	128.813225744442	-0.0649400596756958	0.697191799383396	0.800354669582747	128.813225744442	0.231704610826333	0.160762229877054	0.985126099538007	128.813225744442	-0.00663721637242954
ENSG00000171735.14	CAMTA1	chr1	6845384	7829766	+	984382	3079	193	120	114.037037037037	TRUE	112.515555527566	0.474292840441941	0.01650647025481	0.12644525403814	112.515555527566	0.577493672536084	0.00354116456746784	0.0313554224273929	112.515555527566	0.3702182025521	0.0648283440563152	0.139685903318239	112.515555527566	0.677218802089355	0.000534879991504518	0.00255809666550546	112.515555527566	0.4505288740199	0.0241495966977464	0.161630032253626	112.515555527566	0.588401124683265	0.00305675543202538	0.0237640671644598	112.515555527566	0.912338784984847	2.85645655727548e-06	3.64690703562499e-05	112.515555527566	0.789932133136687	6.17282710169661e-05	0.000464845268014204	112.515555527566	-0.0237639664220402	0.901604494669514	0.998625307316004	112.515555527566	0.0109074521471808
ENSG00000049245.8	VAMP3	chr1	7831329	7841492	+	10163	4388	245	167	162.518518518519	FALSE	158.634957554826	0.0618125497691104	0.663933639981229	0.83994984601082	158.634957554826	0.0626899350015384	0.661959354871477	0.829760308560861	158.634957554826	0.351675181120317	0.012559697142943	0.0383523947808217	158.634957554826	0.0496847496688891	0.726650317820675	0.818318630093143	158.634957554826	-0.138309905185107	0.343163383582768	0.64764555119305	158.634957554826	-0.206518017169115	0.16038695480307	0.34103816233072	158.634957554826	-0.055351488847089	0.701982071020754	0.809684927711633	158.634957554826	-0.507165654279189	0.000852758458972219	0.00434994929186403	158.634957554826	-0.200122454954217	0.165419815852439	0.985126099538007	158.634957554826	-0.269207952170653
ENSG00000049246.10	PER3	chr1	7844380	7905237	+	60857	1087	68	39	40.2592592592593	FALSE	39.5683336974488	0.282519661485558	0.251812973848406	0.533781031874268	39.5683336974488	0.275083656358788	0.268991776021866	0.517596561656626	39.5683336974488	0.0125268916820025	0.960782804181456	0.97672074110015	39.5683336974488	-0.268922904003	0.29670543812024	0.432713691635722	39.5683336974488	-0.0331932203682551	0.896992896303711	0.96438945874831	39.5683336974488	0.0549107130201957	0.829576580683418	0.91052587647639	39.5683336974488	-0.121179754838304	0.638109771159452	0.762436927056998	39.5683336974488	-0.834767240871552	0.0033858642223254	0.013497886711343	39.5683336974488	-0.315712881853813	0.203889703622328	NA	39.5683336974488	-0.220172943338592
ENSG00000116288.8	PARK7	chr1	8014351	8045565	+	31214	34387	1925	1169	1273.59259259259	FALSE	1251.70800410525	0.0375615815109814	0.728019694898526	0.875515361871471	1251.70800410525	-0.185998570474798	0.0869400069745763	0.26630434401106	1251.70800410525	0.293781561518084	0.00643500714869195	0.0224593375975164	1251.70800410525	-0.0483447041716784	0.654729572692822	0.76240689070219	1251.70800410525	-0.116960757878935	0.281355255928383	0.591679817057672	1251.70800410525	0.163044855565308	0.131565285694538	0.298999777156435	1251.70800410525	0.152344345741214	0.158564243907584	0.292365305184877	1251.70800410525	-0.0463555277703545	0.669560688082845	0.779881540739829	1251.70800410525	-0.154522339389917	0.153691066344085	0.975431061423351	1251.70800410525	0.349043426040106
ENSG00000142599.13	RERE	chr1	8412457	8877702	-	465245	3321	183	121	123	FALSE	121.429083510012	0.145945129788035	0.52427668685286	0.753251327934636	121.429083510012	-0.0221179121492963	0.924015372631648	0.965554209186837	121.429083510012	0.564332276715822	0.0129248773528318	0.0391540270605231	121.429083510012	0.392367693283298	0.0840217520057877	0.167252976774962	121.429083510012	0.0363954750427949	0.875140088802006	0.956264161742696	121.429083510012	0.479643715041687	0.0354569161950792	0.126078494321518	121.429083510012	0.339011156533942	0.138282752787107	0.263913346491889	121.429083510012	-0.0233899285255124	0.920131523022346	0.952392395291388	121.429083510012	-0.109549654745241	0.63278811036399	0.998625307316004	121.429083510012	0.501761627190983
ENSG00000074800.9	ENO1	chr1	8921061	8939308	-	18247	116373	6118	4143	4310.11111111111	FALSE	4224.33674871662	-0.0806615401125362	0.423382097294264	0.684992998547679	4224.33674871662	0.0969834671382006	0.335642768400928	0.58372934996998	4224.33674871662	0.276701945429202	0.00596753069088372	0.0211096646971309	4224.33674871662	0.261735593635653	0.0092500742820525	0.0286397770279855	4224.33674871662	-0.160955835684564	0.110683846154246	0.372834214149593	4224.33674871662	0.0107706151559404	0.914921616086476	0.957822040591944	4224.33674871662	0.11534903515066	0.252131780611294	0.404003326525149	4224.33674871662	0.238026890569503	0.0181124973186573	0.0526488881823974	4224.33674871662	-0.0802942955720277	0.426092874429019	0.998625307316004	4224.33674871662	-0.0862128519822602
ENSG00000180758.10	GPR157	chr1	9160364	9189229	-	28865	531	38	19	19.6666666666667	FALSE	19.3869768386831	1.02996237663575	0.0130176573399784	0.110166574402903	19.3869768386831	1.68427031647091	2.50032397558022e-05	0.000753148435491724	19.3869768386831	1.01873808163635	0.015198938079356	0.0443102899518234	19.3869768386831	1.8796968758211	1.67407015406934e-06	1.59611452672319e-05	19.3869768386831	0.86282327337099	0.0430717224221368	0.226553511801327	19.3869768386831	1.3912824072593	0.000676677090955492	0.00755396059074183	19.3869768386831	1.3420561743186	0.00102273151821841	0.00545170502152897	19.3869768386831	1.68226499572916	3.00221655064269e-05	0.000252430614567354	19.3869768386831	-0.167139103264761	0.648833758719755	NA	19.3869768386831	-0.292987909211607
ENSG00000049239.8	H6PD	chr1	9294834	9331396	+	36562	1423	73	54	52.7037037037037	FALSE	51.7319970774804	-0.247802748471412	0.269891710163859	0.553614435945533	51.7319970774804	-0.0589322553244874	0.791686387834497	0.898572645586581	51.7319970774804	0.143956591957472	0.512269744456365	0.64904139371505	51.7319970774804	-0.196772132490029	0.377649515144513	0.518189251323987	51.7319970774804	-0.175075568316232	0.439202196319663	0.723133354918756	51.7319970774804	-0.37733628469592	0.103503494454874	0.255765309156289	51.7319970774804	-0.206560779485714	0.361211444396587	0.518115398693798	51.7319970774804	-0.127222318156977	0.575893734019286	0.703808516090686	51.7319970774804	0.0727271801551798	0.750813925474457	NA	51.7319970774804	-0.318404029371433
ENSG00000171612.6	SLC25A33	chr1	9599541	9645237	+	45696	973	52	36	36.037037037037	FALSE	35.6599315968866	0.491413584343952	0.077333335771258	0.287993129471835	35.6599315968866	0.355923998408898	0.210535775857044	0.447457762321381	35.6599315968866	0.244680441837972	0.395241031610088	0.542243601495638	35.6599315968866	0.762959128538248	0.00503692429535897	0.0174156067270661	35.6599315968866	0.616143229967214	0.0271622285080629	0.173518017629509	35.6599315968866	0.505610828599391	0.0733534327056975	0.205614062522108	35.6599315968866	0.586024631445927	0.0355236547842334	0.0933758654803916	35.6599315968866	0.90225572332845	0.00102632336283973	0.00506099300898658	35.6599315968866	0.124729645623263	0.633565849445295	NA	35.6599315968866	0.149686830190493
ENSG00000188807.8	TMEM201	chr1	9648932	9674935	+	26003	1934	107	69	71.6296296296296	FALSE	70.5721830176786	-0.28547022681126	0.158205470268204	0.426133315793654	70.5721830176786	-0.356775633615707	0.0819744411880869	0.2554084447396	70.5721830176786	-0.734030703118971	0.000538413835036922	0.00292799592297313	70.5721830176786	-0.59937627878089	0.00373545913215382	0.0135170571739323	70.5721830176786	-0.205165049277525	0.313072254273687	0.620477203247463	70.5721830176786	-0.423692114203219	0.0410719923874249	0.139669433077305	70.5721830176786	-0.791332619705911	0.000203474028643121	0.00143497636390696	70.5721830176786	-0.557700115069231	0.00821881408945259	0.0279710386820665	70.5721830176786	0.0803051775337348	0.696207114177737	0.998625307316004	70.5721830176786	-0.0669164805875124
ENSG00000171608.11	PIK3CD	chr1	9711790	9789172	+	77382	6726	377	243	249.111111111111	FALSE	244.875710267968	0.222503380395805	0.0838399201336369	0.30076767473052	244.875710267968	0.125755677981067	0.334633900529596	0.582830985235794	244.875710267968	0.028962566150425	0.825356083791011	0.888260114172303	244.875710267968	0.124757581088611	0.334262854823822	0.473574573973929	244.875710267968	0.220773340727337	0.0891263775130538	0.331456041170207	244.875710267968	0.540206624128035	2.38466591521789e-05	0.000563567588367718	244.875710267968	0.362489060897085	0.00483011106173203	0.0195555209545038	244.875710267968	0.426944423054729	0.000938354705114927	0.00470944493336929	244.875710267968	-0.00173003966846765	0.989151080943176	0.999109507644424	244.875710267968	0.414450946146968
ENSG00000171603.12	CLSTN1	chr1	9789084	9884584	-	95500	6852	400	247	253.777777777778	FALSE	249.221596491169	-0.276408547376018	0.137137485848834	0.394115038568156	249.221596491169	-0.200789752318153	0.280920943968894	0.530442734404504	249.221596491169	0.368279495308712	0.0449607803108749	0.105749468989527	249.221596491169	-0.266568930781108	0.151247916949627	0.262960084135078	249.221596491169	-0.231763069417799	0.2140814867913	0.518107450324424	249.221596491169	-0.258937491451616	0.165948688798188	0.349270499445925	249.221596491169	-0.0357269109652264	0.847209392287555	0.911085884045409	249.221596491169	-0.518207788237363	0.00610959871152109	0.0219530506067838	249.221596491169	0.0446454779582191	0.811648222300775	0.998625307316004	249.221596491169	-0.0581477391334629
ENSG00000178585.10	CTNNBIP1	chr1	9908334	9970394	-	62060	2529	132	96	93.6666666666667	FALSE	92.2005635847868	0.0203946559480133	0.903796971604011	0.954997047758911	92.2005635847868	-0.0440462041976902	0.797158825322267	0.901565243215609	92.2005635847868	-0.611389087479507	0.000790565431138277	0.00401951667503723	92.2005635847868	0.269330866823238	0.10304006268246	0.195895164098489	92.2005635847868	0.274435772054922	0.101137830137595	0.354800931149889	92.2005635847868	-0.0427245150047448	0.804409603845663	0.896411304210253	92.2005635847868	-0.520639283510185	0.00380661924478664	0.0161744577401956	92.2005635847868	0.342600479614804	0.0411782380704263	0.0994590441679284	92.2005635847868	0.254041116106908	0.124806954731197	0.975431061423351	92.2005635847868	0.0013216891929454
ENSG00000162441.7	LZIC	chr1	9982173	10003465	-	21292	1904	95	73	70.5185185185185	FALSE	69.3179294646855	-0.25922107833477	0.168454773434386	0.439744158853688	69.3179294646855	-0.129180573251857	0.491821122456052	0.717269406555798	69.3179294646855	-0.425469824716618	0.0284891655159898	0.072997325483012	69.3179294646855	-0.0823642486290848	0.65560026713671	0.762921742518411	69.3179294646855	-0.0387643162377307	0.835815029818598	0.940728607342377	69.3179294646855	-0.118427970649177	0.531183669793125	0.712898065213972	69.3179294646855	-0.216630527406197	0.253303152024678	0.404975136540354	69.3179294646855	0.116175594481149	0.532341938411732	0.669069925660965	69.3179294646855	0.220456762097039	0.245172808180525	0.998625307316004	69.3179294646855	0.0107526026026796
ENSG00000173614.9	NMNAT1	chr1	10003486	10045559	+	42073	854	50	32	31.6296296296296	FALSE	31.1257957477262	-0.228646823774666	0.453126227027567	0.705923582865272	31.1257957477262	-0.444716152912912	0.156874059552244	0.376783519203265	31.1257957477262	0.327959781369464	0.266582629732926	0.406112334614569	31.1257957477262	-0.107473884379824	0.721173513385231	0.814172003549888	31.1257957477262	-0.00798321823918684	0.978989492050317	0.991196647237237	31.1257957477262	-0.186925752095925	0.544868912543282	0.722399534346114	31.1257957477262	-0.0118823326796059	0.968659507072996	0.981248105318131	31.1257957477262	-0.210582178155974	0.498689379837704	0.639517153958418	31.1257957477262	0.220663605535479	0.470954741949504	NA	31.1257957477262	0.257790400816987
ENSG00000130939.14	UBE4B	chr1	10092890	10241297	+	148407	1635	96	59	60.5555555555556	FALSE	59.8095474349625	0.257253852306915	0.237709268761975	0.519116382948859	59.8095474349625	0.137011702812896	0.536962869362675	0.750219403902177	59.8095474349625	0.504422004583916	0.0195919981971022	0.0540666136582143	59.8095474349625	-0.110340087416138	0.622143602799619	0.736545926756989	59.8095474349625	-0.0664068481241684	0.769598409488424	0.912550235750486	59.8095474349625	0.210496254317873	0.342854710071748	0.555342135198242	59.8095474349625	0.349562094514074	0.109421952961671	0.220681678170088	59.8095474349625	0.131223617591184	0.559166680387315	0.689913235479267	59.8095474349625	-0.323660700431084	0.141748933843416	0.975431061423351	59.8095474349625	0.0734845515049772
ENSG00000054523.12	KIF1B	chr1	10270863	10441661	+	170798	3502	181	131	129.703703703704	FALSE	127.145131284633	-0.0943382524443257	0.546310929968131	0.76763423840873	127.145131284633	0.0641276372854468	0.680849352473611	0.840281575844514	127.145131284633	0.071969726328077	0.644514790217194	0.756959876535817	127.145131284633	-0.000109891562430473	0.999434396849425	0.999546882431513	127.145131284633	-0.210776717655873	0.187103266166956	0.487746320484632	127.145131284633	0.150469804505278	0.33400109644099	0.546580799811167	127.145131284633	-0.0912233891542917	0.563218709263276	0.701938600411941	127.145131284633	-0.234986524542069	0.145671625192201	0.262297479525411	127.145131284633	-0.116438465211547	0.465685557812501	0.998625307316004	127.145131284633	0.0863421672198309
ENSG00000142657.16	PGD	chr1	10458649	10480201	+	21552	4678	258	169	173.259259259259	FALSE	169.927229778445	0.150751740388482	0.37905046718021	0.651377805333705	169.927229778445	0.433486093127162	0.0108376730298266	0.0695332581538187	169.927229778445	0.600316050465844	0.00038282938061865	0.00218065504883162	169.927229778445	0.404355985180859	0.0168955175101344	0.0469984261511819	169.927229778445	0.102710388599283	0.553087976406449	0.800576601783304	169.927229778445	0.264448113930848	0.124246318301383	0.288641250830351	169.927229778445	0.287633414650717	0.0931905026710684	0.195627405323674	169.927229778445	0.12731603063392	0.464005356119702	0.60867310222611	169.927229778445	-0.0480413517891985	0.778526521339104	0.998625307316004	169.927229778445	-0.169037979196315
ENSG00000175279.17	APITD1	chr1	10490159	10512210	+	22051	2039	114	72	75.5185185185185	FALSE	74.5840960377846	0.0200187658205006	0.914202160606237	0.959782655853854	74.5840960377846	-0.363149085873418	0.0608706190313824	0.212616478267635	74.5840960377846	-0.743228299158027	0.00023349994261052	0.00142407720661433	74.5840960377846	-0.567222646664229	0.00361253687989685	0.01315696198061	74.5840960377846	-0.0896387598464758	0.636598202954325	0.847183419835413	74.5840960377846	0.0652660544049714	0.728285231610214	0.848838217220404	74.5840960377846	-0.129925305857226	0.493714463554321	0.642579878438649	74.5840960377846	-0.200320417819544	0.300044093330831	0.446523499135449	74.5840960377846	-0.109657525666976	0.559538228379851	0.998625307316004	74.5840960377846	0.42841514027839
ENSG00000160049.7	DFFA	chr1	10516579	10532583	-	16004	6942	344	254	257.111111111111	FALSE	251.713992007374	-0.190661289809482	0.139304140445283	0.397272900240409	251.713992007374	-0.228031201786696	0.0796548341542875	0.251299984276437	251.713992007374	0.038560744545022	0.763813297397187	0.845156750780079	251.713992007374	-0.249282643504072	0.0536359287956415	0.118177253478322	251.713992007374	-0.201232607764242	0.122080311250174	0.393187983243583	251.713992007374	-0.212194722564369	0.10398278115708	0.256450456109302	251.713992007374	-0.27247036596874	0.0368069961670799	0.0959985230233848	251.713992007374	-0.386590330110403	0.00352611361352108	0.0139443905517349	251.713992007374	-0.0105713179547603	0.935525386292975	0.998625307316004	251.713992007374	0.0158364792223263
ENSG00000142655.8	PEX14	chr1	10532345	10690815	+	158470	1091	61	37	40.4074074074074	FALSE	39.690791835152	-0.139960773130632	0.581381674969121	0.789524510264321	39.690791835152	-0.298210844443539	0.250985125963712	0.497158677956653	39.690791835152	-0.291907163124121	0.261577379881201	0.400466667990051	39.690791835152	-0.432270037995687	0.0958571035034254	0.185211181067936	39.690791835152	-0.0668195171809478	0.793703813333531	0.923483664145331	39.690791835152	-0.463325806710669	0.0813161331574026	0.219361007661409	39.690791835152	-0.362430779154554	0.165638697826545	0.301593543956138	39.690791835152	-0.464461601654585	0.082653785359122	0.170408709211406	39.690791835152	0.0731412559496838	0.775212089361642	NA	39.690791835152	-0.16511496226713
ENSG00000120948.11	TARDBP	chr1	11072414	11085796	+	13382	18768	988	674	695.111111111111	FALSE	683.339182079274	0.0950838153582851	0.337869848163532	0.614724201638242	683.339182079274	0.00948156563958383	0.924393828627524	0.965577002607756	683.339182079274	-0.0162805767369818	0.87070896610947	0.919662412082343	683.339182079274	-0.0809969618805349	0.416511582841229	0.557562086231765	683.339182079274	0.156705872417885	0.115306100266785	0.380394780511479	683.339182079274	0.0345920483029141	0.729552144111107	0.84953483849709	683.339182079274	-0.0314031333995692	0.75370956207615	0.846708365184408	683.339182079274	-0.0530582837180682	0.597981574397566	0.721891615738125	683.339182079274	0.0616220570595998	0.532934418878717	0.998625307316004	683.339182079274	0.0251104826633303
ENSG00000116649.5	SRM	chr1	11114641	11120081	-	5440	7862	460	282	291.185185185185	FALSE	286.683579573392	-0.292603999678709	0.124600629328669	0.371170362794017	286.683579573392	-0.418947363846926	0.0287428068605328	0.131247986517315	286.683579573392	-0.424194040786834	0.0268392131492813	0.0695518367000623	286.683579573392	-0.951040300620689	8.81322138471228e-07	8.88924917418312e-06	286.683579573392	-0.268838702295163	0.159355785973561	0.449249845863282	286.683579573392	-0.301967960218229	0.114515056164487	0.273102734588737	286.683579573392	-0.44307286452739	0.0208261983103686	0.0619004626352555	286.683579573392	-0.830079166780508	1.9542545396391e-05	0.000174177591165828	286.683579573392	0.0237652973835456	0.901320356639544	0.998625307316004	286.683579573392	0.116979403628697
ENSG00000171824.9	EXOSC10	chr1	11126675	11159938	-	33263	3577	198	127	132.481481481481	FALSE	130.298795717774	0.187021660366502	0.201105868476172	0.478710620755227	130.298795717774	-0.0225798243905451	0.880131898369094	0.943922207184558	130.298795717774	-0.207719999479471	0.172323072166734	0.293682934268047	130.298795717774	-0.389384086907838	0.0106700840451937	0.0322971961199535	130.298795717774	0.0379285331502079	0.799688391748709	0.926115593967606	130.298795717774	-0.0895884980510601	0.554086615329991	0.730289775114551	130.298795717774	-0.0532106424720519	0.723067835876949	0.825773282015093	130.298795717774	-0.438077154167027	0.00536643534754211	0.0198032161537621	130.298795717774	-0.149093127216294	0.308460810907577	0.998625307316004	130.298795717774	-0.067008673660515
ENSG00000198793.8	MTOR	chr1	11166592	11322564	-	155972	3552	206	133	131.555555555556	TRUE	130.001699102392	0.12965663744476	0.443377982231218	0.699537512107335	130.001699102392	-0.119548460582747	0.489940556335829	0.715877810474812	130.001699102392	0.156352083344975	0.358321199631238	0.503326300967938	130.001699102392	0.0237104900585475	0.889030654263411	0.92901689020572	130.001699102392	-0.34137469072951	0.0531846818787238	0.253404334141737	130.001699102392	0.346499575029211	0.0402248457645723	0.137687973599379	130.001699102392	0.139855009665968	0.411607394610347	0.564000510178496	130.001699102392	0.255510559563043	0.133826752071085	0.24590250597677	130.001699102392	-0.47103132817427	0.0068327016564343	0.498422567783062	130.001699102392	0.466048035611957
ENSG00000120942.9	UBIAD1	chr1	11333263	11356106	+	22843	2087	132	76	77.2962962962963	FALSE	75.5023173079947	-0.585384806768342	0.00107078345691837	0.0237756969481512	75.5023173079947	-0.405149215415088	0.0226205475894438	0.112988300101067	75.5023173079947	-0.247640469417172	0.157711063038787	0.274573515767736	75.5023173079947	-0.55065784389265	0.0019552580239958	0.0077947163756064	75.5023173079947	-0.248177624692996	0.157776769853813	0.44649073446379	75.5023173079947	-0.425933636504646	0.0176510930805038	0.079658513516179	75.5023173079947	-0.241124923900853	0.168174595479331	0.304730720927678	75.5023173079947	-0.696665088119147	0.000189256150367093	0.00121424559722887	75.5023173079947	0.337207182075346	0.0658767286852868	0.901902683084911	75.5023173079947	-0.0207844210895579
ENSG00000116663.6	FBXO6	chr1	11724181	11734411	+	10230	425	38	16	15.7407407407407	FALSE	15.1844433440886	0.465333478879567	0.241003332310433	0.523415122750862	15.1844433440886	-1.07982210628651	0.0172940489105536	0.0950370554231166	15.1844433440886	-3.13722136830724	1.83339903917445e-06	2.11579011196157e-05	15.1844433440886	-0.568008376887719	0.180773506033883	0.300365253294145	15.1844433440886	0.466303187923479	0.243776396741311	0.55078404618272	15.1844433440886	-1.34482607438814	0.00454079309645437	0.0313029382894442	15.1844433440886	-1.79684571249089	0.000335344722269927	0.00217667874513555	15.1844433440886	0.0339231154002291	0.93464283210268	0.960801804509576	15.1844433440886	0.000969709043912112	0.997996076458311	NA	15.1844433440886	-0.265003968101632
ENSG00000116670.10	MAD2L2	chr1	11734537	11751707	-	17170	3676	261	131	136.148148148148	FALSE	133.417186311509	-0.335992463781769	0.0289877417341903	0.176084526674001	133.417186311509	-0.332447661795563	0.0320305968154368	0.141745717211982	133.417186311509	-0.703953975620898	1.03877359618496e-05	9.77811671154614e-05	133.417186311509	-0.582852558071346	0.00019024741188358	0.00105658656374843	133.417186311509	-0.324579611710886	0.0366829385352023	0.207917690032611	133.417186311509	-0.549812733174101	0.000518737920448623	0.00615421249813947	133.417186311509	-0.887091488839707	4.45430840805613e-08	8.97527993514439e-07	133.417186311509	-0.514998697396168	0.00117998756441951	0.00564640252958094	133.417186311509	0.0114128520708826	0.942193407292603	0.998625307316004	133.417186311509	-0.217365071378538
ENSG00000177674.11	AGTRAP	chr1	11796141	11814859	+	18718	5401	321	185	200.037037037037	FALSE	197.876034524055	0.229000473003364	0.14797890255709	0.410021991930871	197.876034524055	0.38890308284529	0.0138294928619582	0.0818713348243574	197.876034524055	0.399727852999827	0.0113999393260744	0.0354071516433056	197.876034524055	0.583925690089457	0.000173099179574326	0.000971060170263547	197.876034524055	0.382858892327881	0.0155832449903826	0.125852958618287	197.876034524055	0.440001007600086	0.00539346396632779	0.0352536609439628	197.876034524055	0.373827416617358	0.0181053495690332	0.0552845109966437	197.876034524055	1.09427352305254	1.24516146175903e-12	5.24384111336056e-11	197.876034524055	0.153858419324517	0.321269946436271	0.998625307316004	197.876034524055	0.0510979247547961
ENSG00000177000.6	MTHFR	chr1	11845780	11866977	-	21197	1482	86	50	54.8888888888889	FALSE	53.8090351484387	0.362812332284162	0.100493551615826	0.328026166324798	53.8090351484387	0.346923945500984	0.120695915743726	0.322073245435061	53.8090351484387	0.533612433254981	0.0153381390431203	0.0445407527899239	53.8090351484387	0.87760390276811	3.37248194222613e-05	0.000236153463661319	53.8090351484387	0.386458175020307	0.0839836751556085	0.321137690995063	53.8090351484387	0.519105146086343	0.0191219904083864	0.0840196950647437	53.8090351484387	0.148144453156849	0.51613846696708	0.662679730887078	53.8090351484387	0.934410340344486	1.39742039299683e-05	0.000130435689203465	53.8090351484387	0.0236458427361449	0.911344984016311	NA	53.8090351484387	0.172181200585359
ENSG00000011021.17	CLCN6	chr1	11866207	11903201	+	36994	2417	123	92	89.5185185185185	FALSE	87.8004711862035	0.393199978143282	0.0267301655251675	0.16715288589489	87.8004711862035	0.55373639342986	0.00174640625116662	0.0191350998124126	87.8004711862035	0.427755054361616	0.0167553389121725	0.0477490602389745	87.8004711862035	0.470631367806911	0.00753630866913377	0.0242285234565567	87.8004711862035	0.34142407627376	0.058470313619169	0.265447707848397	87.8004711862035	0.413691367041634	0.0214474732147182	0.0907271358486823	87.8004711862035	0.0716982324550482	0.697150308746632	0.805785333444663	87.8004711862035	0.117692636585456	0.526563132674711	0.664258943348592	87.8004711862035	-0.0517759018695213	0.763887848287854	0.998625307316004	87.8004711862035	-0.140045026388227
ENSG00000120937.8	NPPB	chr1	11917521	11918988	-	1467	5236	387	210	193.925925925926	FALSE	191.178104863749	0.21438742661814	0.21210478627524	0.49260319521119	191.178104863749	-0.270935493259619	0.121824244307258	0.323723156373892	191.178104863749	-3.92572506500723	2.1947883225044e-50	1.6252407528145e-47	191.178104863749	-0.541310091368124	0.00208996577809084	0.0082649915016089	191.178104863749	0.278610094886213	0.105723491354464	0.363708456901188	191.178104863749	-0.143256153437745	0.412273466014601	0.617320418665294	191.178104863749	-3.23629245042012	6.37310736382306e-45	4.04510228820941e-42	191.178104863749	-0.212202382943625	0.226813539868823	0.364173546075314	191.178104863749	0.0642226682680725	0.70660703878749	0.998625307316004	191.178104863749	0.127679339821874
ENSG00000116685.11	KIAA2013	chr1	11979648	11986485	-	6837	19827	994	745	734.333333333333	FALSE	720.115814933192	-0.0287420836377603	0.806573316708711	0.911047475819703	720.115814933192	0.0780030935962699	0.506585360287061	0.727888953144716	720.115814933192	-0.100983358677109	0.391989555610552	0.538781004045687	720.115814933192	0.10992244253593	0.347349789414611	0.487026360796097	720.115814933192	0.171433355581641	0.143778737590105	0.423753851484468	720.115814933192	-0.0975879128697398	0.408782964328564	0.614107425363249	720.115814933192	-0.157763428177186	0.181804323401175	0.322715385086465	720.115814933192	-0.138259776847081	0.24317365066391	0.382778239790977	720.115814933192	0.200175439219401	0.0872180791904756	0.947349530467335	720.115814933192	-0.17559100646601
ENSG00000083444.12	PLOD1	chr1	11994262	12035595	+	41333	8244	507	298	305.333333333333	FALSE	300.411991651382	0.235742489156722	0.110694250569967	0.346104542774358	300.411991651382	-0.0342552240439022	0.819308425437167	0.915309865279691	300.411991651382	0.586279727746277	6.52266681973803e-05	0.000482601310243065	300.411991651382	0.196237231281679	0.18441302837631	0.305280923067486	300.411991651382	0.139843923212253	0.348297925081025	0.650788143655015	300.411991651382	0.160950222353148	0.280677328387707	0.489283042206918	300.411991651382	0.184971643017166	0.213652493507019	0.358819893650231	300.411991651382	0.132645330782662	0.375632142998416	0.52548287510767	300.411991651382	-0.0958985659444689	0.514811641443271	0.998625307316004	300.411991651382	0.19520544639705
ENSG00000116688.12	MFN2	chr1	12040238	12073571	+	33333	5899	347	214	218.481481481481	FALSE	211.895128359851	-0.0720720759873002	0.550663979539191	0.769689208141768	211.895128359851	-0.0228112408358452	0.850817889238339	0.932112903929463	211.895128359851	-0.0179143611082836	0.88262944681891	0.927184661327562	211.895128359851	-0.137508857610806	0.255938967148832	0.389312886729529	211.895128359851	-0.289033509129141	0.0194993712075216	0.143323968745593	211.895128359851	-0.922578929614026	1.95937280249939e-12	6.21820954393199e-10	211.895128359851	-1.19342070954943	5.07604209092857e-19	5.63821375249891e-17	211.895128359851	-1.16227724400793	9.95874349755685e-18	8.04485406539002e-16	211.895128359851	-0.216961433141841	0.078892101391284	0.925422071515223	211.895128359851	-0.899767688778181
ENSG00000028137.12	TNFRSF1B	chr1	12227060	12269285	+	42225	515	67	18	19.0740740740741	FALSE	18.5882384617221	-0.0689100047633789	0.844229070589921	0.928557930593147	18.5882384617221	-0.44026966212294	0.23062531154178	0.471871176228474	18.5882384617221	-1.74402392706658	8.63989735858328e-05	0.000616659662075269	18.5882384617221	0.903560115892766	0.00598620127007274	0.0200578372872799	18.5882384617221	-0.0609322794954308	0.863815740767305	0.952172341761719	18.5882384617221	-0.927654478775699	0.0183663374699938	0.0817651677146116	18.5882384617221	-2.09648557767023	9.32940677781362e-06	0.000104938112186901	18.5882384617221	-0.146414038730802	0.685471854813071	0.791978013505259	18.5882384617221	0.0079777252679481	0.982024898229357	NA	18.5882384617221	-0.48738481665276
ENSG00000048707.9	VPS13D	chr1	12290124	12572099	+	281975	3660	194	130	135.555555555556	FALSE	133.162007773453	0.206581148689149	0.201426104367566	0.479087891705083	133.162007773453	0.179731978580741	0.270874303827105	0.518524141276962	133.162007773453	0.240737256660334	0.139024672204466	0.250940344282306	133.162007773453	0.0889426405849405	0.584461666800274	0.705833972708241	133.162007773453	0.279843037261785	0.0851451196450406	0.322781370804535	133.162007773453	0.289117578381039	0.0757938090876789	0.209945070933016	133.162007773453	0.0375450696536223	0.819929276016749	0.891567736990312	133.162007773453	0.269884096772878	0.0992737117281505	0.196032489425854	133.162007773453	0.0732618885726358	0.644960167994768	0.998625307316004	133.162007773453	0.109385599800297
ENSG00000162496.4	DHRS3	chr1	12627939	12677737	-	49798	2587	198	83	95.8148148148148	FALSE	93.8601964154202	0.188254427214861	0.371620213493114	0.64489636355104	93.8601964154202	0.57052762154138	0.00571593670483183	0.0445151740220295	93.8601964154202	1.44456976883682	2.03680545228741e-13	8.53728926840847e-12	93.8601964154202	1.44486879569457	1.39085595828952e-13	4.94365841814427e-12	93.8601964154202	0.428363430578149	0.0406604070959078	0.219107566679343	93.8601964154202	0.531442748311732	0.0106754759281301	0.0566680281346263	93.8601964154202	0.902001914947826	8.08978953539225e-06	9.29959505970188e-05	93.8601964154202	1.24832432012244	4.03627962811764e-10	1.10019572930838e-08	93.8601964154202	0.240109003363288	0.237875013534385	0.998625307316004	93.8601964154202	-0.0390848732296489
ENSG00000116731.18	PRDM2	chr1	14026693	14151574	+	124881	2804	147	102	103.851851851852	FALSE	102.373730782175	-0.180452433877555	0.313068243675387	0.595318727434088	102.373730782175	-0.0583921056902452	0.744027738860238	0.873949833114617	102.373730782175	0.041996245765855	0.813214617705505	0.880910236425816	102.373730782175	-0.209035563284897	0.242608209267304	0.374533799087781	102.373730782175	0.0878098932199866	0.620727696635066	0.837374572992135	102.373730782175	-0.179918668605924	0.321510991538332	0.53271427760761	102.373730782175	0.0168652147427254	0.924499519263521	0.957471180440053	102.373730782175	-0.147459974942021	0.417670209090042	0.56650499797137	102.373730782175	0.268262327097542	0.132582223436412	0.975431061423351	102.373730782175	-0.121526562915679
ENSG00000189337.11	KAZN	chr1	14925200	15444539	+	519339	1229	80	47	45.5185185185185	FALSE	44.4356825801625	-0.201178532259458	0.385333294716765	0.656092979951836	44.4356825801625	0.298771859760986	0.181769927003636	0.411308268743139	44.4356825801625	0.431537517910886	0.0515685664199419	0.117527130343063	44.4356825801625	0.0557742241226183	0.804788404746285	0.872541454926243	44.4356825801625	-0.428466667525611	0.0762980632641846	0.307058238299612	44.4356825801625	-0.323245412765471	0.177397408950026	0.363969839743693	44.4356825801625	-0.0032327446366746	0.988781659673708	0.9933650455467	44.4356825801625	-0.942370121000643	0.000338892076128478	0.00200625915288318	44.4356825801625	-0.227288135266154	0.351059420688547	NA	44.4356825801625	-0.622017272526458
ENSG00000171729.9	TMEM51	chr1	15479028	15546976	+	67948	3240	204	119	120	FALSE	117.222606196764	0.0465741329561857	0.756002773309921	0.888220420694024	117.222606196764	-0.249698267684296	0.107635214206049	0.30076934384747	117.222606196764	-0.470317470658941	0.00308151326869398	0.0123399400205564	117.222606196764	0.447534114234865	0.00211472226520145	0.00835174313270227	117.222606196764	0.0355452967664713	0.814952328212285	0.932150267648122	117.222606196764	-0.00517963653344539	0.972965466022928	0.985834792597462	117.222606196764	-0.670036726380682	3.60597322743841e-05	0.000329996684850852	117.222606196764	-0.232917071776771	0.138043974646372	0.252087702159405	117.222606196764	-0.0110288361897144	0.941398262470729	0.998625307316004	117.222606196764	0.24451863115085
ENSG00000142634.8	EFHD2	chr1	15736391	15756839	+	20448	6589	364	243	244.037037037037	FALSE	239.254079754932	-0.129452115928563	0.272856193616267	0.557302409907633	239.254079754932	-0.0205838203568538	0.861681589857251	0.936690951688328	239.254079754932	-0.295570945709326	0.0144420188702687	0.0425503248279865	239.254079754932	0.0850921527712474	0.463806059615227	0.601134866648324	239.254079754932	-0.153051879167542	0.200888022259028	0.504019955127221	239.254079754932	-0.00928637669603611	0.937623271275303	0.968158942225321	239.254079754932	0.138740570041785	0.235313482682	0.384740556112497	239.254079754932	0.289334389248503	0.0131816304499148	0.0407983170247102	239.254079754932	-0.0235997632389795	0.843873100344387	0.998625307316004	239.254079754932	0.0112974436608177
ENSG00000116138.8	DNAJC16	chr1	15853308	15918874	+	65566	2753	166	106	101.962962962963	FALSE	99.6457508709742	-0.0990234945687776	0.577728375058825	0.786893675777548	99.6457508709742	0.267875736965904	0.126062475255353	0.331221512453893	99.6457508709742	0.116932838360768	0.508573993199081	0.645875161292987	99.6457508709742	0.1708176549968	0.327854215739378	0.466951845016848	99.6457508709742	0.058282954924038	0.74313038353963	0.901940473037474	99.6457508709742	-0.706571256758263	0.000205370253988467	0.00301639682139093	99.6457508709742	-0.758039058205131	6.59977091603692e-05	0.000557347983034302	99.6457508709742	-0.669966952244036	0.000448487178296884	0.0025279646824777	99.6457508709742	0.157306449492816	0.376091059592969	0.998625307316004	99.6457508709742	-0.974446993724167
ENSG00000197312.7	DDI2	chr1	15943995	15995539	+	51544	3190	213	99	118.148148148148	FALSE	115.397328456422	-0.00612726745340326	0.973747989545429	0.98937595221853	115.397328456422	0.305269303103206	0.0975102061604588	0.284565531242728	115.397328456422	0.562427531816661	0.00199988132533956	0.00871552008679122	115.397328456422	0.621579271522933	0.00056534575563647	0.00268214756251237	115.397328456422	-0.285937236420477	0.135828635512587	0.414198097173937	115.397328456422	-0.324571256390269	0.0922811376951561	0.23900704587081	115.397328456422	-0.177121729324649	0.350702288451659	0.507382047408245	115.397328456422	-0.137366235272069	0.471994289530302	0.615970224227679	115.397328456422	-0.279809968967074	0.142000631254365	0.975431061423351	115.397328456422	-0.629840559493475
ENSG00000116786.7	PLEKHM2	chr1	16010827	16061264	+	50437	8486	485	292	314.296296296296	FALSE	308.635281077649	-0.0824628714467206	0.523190006585181	0.752397863491814	308.635281077649	0.261891502839507	0.0404392340937543	0.163560780226263	308.635281077649	0.48833427833451	0.000115157379386966	0.000781136239108843	308.635281077649	0.509910218444791	5.03047682763637e-05	0.000333837319569655	308.635281077649	-0.0199063885876779	0.878110233342499	0.957433472942406	308.635281077649	0.200739081708734	0.118457710311555	0.279134238618	308.635281077649	0.0715751162008337	0.579034543593967	0.714429965775413	308.635281077649	0.0867590924874654	0.503658093122741	0.642847718398259	308.635281077649	0.0625564828590427	0.629345933420189	0.998625307316004	308.635281077649	-0.0611524211307736
ENSG00000162458.8	FBLIM1	chr1	16083102	16113089	+	29987	1507	93	50	55.8148148148148	FALSE	54.7816891968221	-0.132612413764709	0.54765246722738	0.768105423901568	54.7816891968221	0.079297402662445	0.716658755442028	0.859069827818861	54.7816891968221	0.618548269653162	0.00313941094961641	0.0125266303090666	54.7816891968221	0.320353746315517	0.129963360179991	0.233838112965035	54.7816891968221	-0.219185469332133	0.332450955427368	0.63623093089757	54.7816891968221	0.173426201790404	0.426532209695352	0.629595550723072	54.7816891968221	0.135387548524704	0.533571122015619	0.67713695947312	54.7816891968221	-0.150343069719677	0.507578304789465	0.64673656672773	54.7816891968221	-0.0865730555674242	0.702515354933095	NA	54.7816891968221	0.0941287991279593
ENSG00000065526.6	SPEN	chr1	16174359	16266955	+	92596	7079	350	267	262.185185185185	TRUE	257.701463422339	-0.145853263373061	0.509257299855159	0.744041494000813	257.701463422339	-0.27062198808323	0.222974639292558	0.462824724305926	257.701463422339	-0.0824377244815636	0.709475087943143	0.807734217058478	257.701463422339	-0.182151064146359	0.40986512283056	0.551242845689777	257.701463422339	-0.166202120250392	0.453481562247107	0.733461441959918	257.701463422339	-0.0736041678488804	0.739641523377746	0.856011275948769	257.701463422339	-0.194075072282527	0.381502532073041	0.537929466836091	257.701463422339	-0.191547911565357	0.388811884076018	0.538830692747894	257.701463422339	-0.0203488568773302	0.92691486685198	0.998625307316004	257.701463422339	0.19701782023435
ENSG00000116809.7	ZBTB17	chr1	16268364	16302627	-	34263	717	62	25	26.5555555555556	FALSE	25.8038349064684	-0.39582083991364	0.246387685403708	0.529028108810018	25.8038349064684	-0.0995835265078618	0.767841780867039	0.885231721851145	25.8038349064684	-0.604710134104459	0.0847748047625203	0.171988336785332	25.8038349064684	-0.304432763788831	0.368659546608741	0.508760480069152	25.8038349064684	-0.218122484217304	0.522297429834195	0.780284963266082	25.8038349064684	-0.911809646339885	0.0120607125692032	0.0617347303513477	25.8038349064684	-0.813838132285662	0.022716305196481	0.0658055676448788	25.8038349064684	-0.56981564977416	0.107013482879032	0.20771555457909	25.8038349064684	0.177698355696336	0.608869960174054	NA	25.8038349064684	-0.812226119832024
ENSG00000142627.9	EPHA2	chr1	16450832	16482582	-	31750	24770	1487	957	917.407407407407	FALSE	901.492907845978	0.115399386607035	0.854258646991294	0.932108466536745	901.492907845978	0.577577771546762	0.357821966766408	0.605332994950603	901.492907845978	-0.936236779637117	0.136586813440831	0.247898370963077	901.492907845978	0.308539772710306	0.623299243569098	0.737010921936794	901.492907845978	0.377105594232285	0.548308841226053	0.798120088026111	901.492907845978	-0.0657158774977368	0.916711671488046	0.958785027480578	901.492907845978	-0.0142994638784593	0.981844003870342	0.989864513091883	901.492907845978	-0.298054750938301	0.635364192162888	0.752779494874589	901.492907845978	0.26170620762525	0.676927943085196	0.998625307316004	901.492907845978	-0.643293649044499
ENSG00000142632.12	ARHGEF19	chr1	16524349	16539104	-	14755	1191	62	44	44.1111111111111	FALSE	43.611937745529	-0.324729755915972	0.236848371664594	0.51787269454025	43.611937745529	0.081105935076352	0.762702942485245	0.882474785499847	43.611937745529	0.195377500238712	0.463976954057578	0.607201651510403	43.611937745529	-0.115497037752772	0.668344160361255	0.773597265724907	43.611937745529	0.00448665805275425	0.986782263176152	0.994324426629925	43.611937745529	-0.126601595560465	0.644447081883781	0.79606766280669	43.611937745529	0.162113987731831	0.544145937089401	0.68527222179371	43.611937745529	-0.339854389491819	0.226575242800465	0.364077325049716	43.611937745529	0.329216413968726	0.231814070367665	NA	43.611937745529	-0.207707530636817
ENSG00000037637.6	FBXO42	chr1	16573334	16678949	-	105615	1359	74	49	50.3333333333333	FALSE	49.6509989700411	0.394074049196911	0.0837682026547395	0.300706224092874	49.6509989700411	0.0842444512914807	0.721531088514128	0.861413799359943	49.6509989700411	0.341994883779893	0.139264071740699	0.251269145479766	49.6509989700411	0.491159932149303	0.0296065145539052	0.0735280850547797	49.6509989700411	0.0309157769238381	0.89690466637896	0.96438945874831	49.6509989700411	0.264292007041613	0.258847717870734	0.464858694623957	49.6509989700411	0.0150459375128716	0.949603648156521	0.971245167762298	49.6509989700411	0.486311360691632	0.0351649104226937	0.0878480163103897	49.6509989700411	-0.363158272273073	0.111696330115657	NA	49.6509989700411	0.180047555750133
ENSG00000055070.12	SZRD1	chr1	16679070	16724640	+	45570	7722	386	286	286	FALSE	281.457301627888	-0.140396014383274	0.212475835617393	0.493094874718244	281.457301627888	-0.0606306661380273	0.591248130612707	0.787680792897229	281.457301627888	-0.0973670471441219	0.390031214935994	0.536753504091876	281.457301627888	-0.139922799097529	0.213199199058752	0.33933155701882	281.457301627888	-0.117088184097931	0.302706938009969	0.612111910663463	281.457301627888	-0.098455463938549	0.38668964744918	0.597185830375031	281.457301627888	-0.046446771010797	0.680641923208248	0.793620801683308	281.457301627888	0.0478155813577189	0.672428082007245	0.782196090681552	281.457301627888	0.0233078302853423	0.837753476018365	0.998625307316004	281.457301627888	-0.0378247978005217
ENSG00000157191.15	NECAP2	chr1	16767167	16786573	+	19406	4851	321	167	179.666666666667	FALSE	175.321636753993	0.449358429297848	0.0842162400556362	0.301266308025114	175.321636753993	0.453463186407666	0.0821963448916566	0.255920364648655	175.321636753993	0.474166675031851	0.0690588611473118	0.146913344542737	175.321636753993	0.986255158170688	0.000130820530687685	0.000761968592472907	175.321636753993	0.254404999788411	0.331986602521201	0.636057125917074	175.321636753993	0.532754735552027	0.0410866416907581	0.139669433077305	175.321636753993	0.79515070185359	0.00216226273779322	0.0101714487496192	175.321636753993	0.527811564675082	0.0432881368737093	0.103347228441639	175.321636753993	-0.194953429509437	0.451205754303909	0.998625307316004	175.321636753993	0.0792915491443606
ENSG00000219481.6	NBPF1	chr1	16888814	16940057	-	51243	2217	122	73	82.1111111111111	FALSE	80.673409557872	0.293193082229952	0.105690397071775	0.337586221559955	80.673409557872	0.137890907489382	0.45550961246851	0.689315125407899	80.673409557872	-0.374462620946941	0.0530637337610542	0.120077423936923	80.673409557872	-0.519955210698002	0.00715699444895915	0.0232615408461781	80.673409557872	0.441219417626994	0.0149521829713341	0.123365921897191	80.673409557872	0.00896231519625509	0.961940156927534	0.979791224197417	80.673409557872	-0.1748104124654	0.356824948026412	0.513398071269867	80.673409557872	-0.429387768498644	0.0294634341519387	0.076716587141849	80.673409557872	0.148026335397042	0.399448826428	0.998625307316004	80.673409557872	-0.128928592293127
ENSG00000117118.5	SDHB	chr1	17345217	17380665	-	35448	5140	328	198	190.37037037037	TRUE	186.331949347202	-0.00725765263768884	0.96970731867395	0.98737472599252	186.331949347202	-0.272669791309999	0.158743208690502	0.379497485182621	186.331949347202	-0.840449776970519	2.24167356941266e-05	0.000189529127857287	186.331949347202	-0.288585021173374	0.133980339304472	0.239498952938954	186.331949347202	-0.169811093924218	0.378900746148527	0.678539304771425	186.331949347202	-0.367086830418667	0.0592912637315208	0.178355736982854	186.331949347202	-0.432000932456778	0.0264922281190304	0.0739374934746833	186.331949347202	0.0757837866887849	0.693154780765248	0.79721056773444	186.331949347202	-0.16255344128653	0.398220814438679	0.998625307316004	186.331949347202	-0.094417039108668
ENSG00000142623.8	PADI1	chr1	17531621	17572500	+	40879	730	55	24	27.037037037037	FALSE	26.5086979620215	0.0424982307550816	0.888229372254826	0.947629511568782	26.5086979620215	-0.639230853959448	0.0486335397910193	0.184534225919992	26.5086979620215	-0.786742795334691	0.0171780269799651	0.0487213366562303	26.5086979620215	-0.516745331458516	0.101770430850098	0.193896236821176	26.5086979620215	0.351067310741409	0.240756867679305	0.547795037454015	26.5086979620215	-0.46809470384146	0.144749163359471	0.318656729410153	26.5086979620215	-1.12239699661769	0.00108073897090288	0.00568587714354235	26.5086979620215	-0.3072148268587	0.333896518200669	0.482545842387154	26.5086979620215	0.308569079986327	0.296886847681049	NA	26.5086979620215	0.171136150117988
ENSG00000179051.9	RCC2	chr1	17733256	17766220	-	32964	59417	3136	2391	2200.62962962963	FALSE	2157.67011623133	0.29610225632592	0.420729958021489	0.684010070963572	2157.67011623133	0.126532012537372	0.730852216969553	0.865564822215762	2157.67011623133	-1.09804041771808	0.00287501084867521	0.0117082247485463	2157.67011623133	-0.0122064800008451	0.973526788651641	0.983935287074441	2157.67011623133	0.374047116452506	0.309128678513222	0.617284817363706	2157.67011623133	-0.140290158700543	0.702988703081356	0.833606240432367	2157.67011623133	-0.0848537811999979	0.817592107626653	0.890010702073888	2157.67011623133	0.0707079273267714	0.847584905888763	0.90640299097992	2157.67011623133	0.0779448601265852	0.832109059333525	0.998625307316004	2157.67011623133	-0.266822171237915
ENSG00000074964.12	ARHGEF10L	chr1	17866330	18024369	+	158039	3542	280	125	131.185185185185	FALSE	127.861843956722	0.481622062941606	0.00482385465802759	0.0632741850757906	127.861843956722	0.112143447129812	0.524081584883672	0.741260288160999	127.861843956722	0.168455894010007	0.337168595848353	0.482382892079934	127.861843956722	1.00708615594176	1.5211524879933e-09	2.6660672600214e-08	127.861843956722	0.526412041303705	0.00219715004244512	0.0374167211552531	127.861843956722	0.245170050632534	0.161925604345878	0.343424759730163	127.861843956722	-0.311679138824494	0.0868316281228808	0.185611221433707	127.861843956722	0.286634723190049	0.102509241944789	0.200813316134951	127.861843956722	0.0447899783620986	0.786343610649265	0.998625307316004	127.861843956722	0.133026603502722
ENSG00000159423.12	ALDH4A1	chr1	19197926	19229275	-	31349	4722	239	170	174.888888888889	FALSE	171.484043230642	-0.105261321806754	0.498656248156585	0.739176447333962	171.484043230642	0.245878325242036	0.109602391977185	0.304352142221646	171.484043230642	0.227261164419058	0.139764310754476	0.251711727880883	171.484043230642	-0.169949709980937	0.275681914356729	0.410336598153081	171.484043230642	0.0437407331734798	0.77866518834818	0.915994679268361	171.484043230642	-0.107235898643987	0.49568705400956	0.686942476907197	171.484043230642	0.164306288935634	0.287200994970324	0.439330012275142	171.484043230642	-0.303575675814322	0.0581421447125876	0.129681500480937	171.484043230642	0.149002054980234	0.338221468994923	0.998625307316004	171.484043230642	-0.353114223886023
ENSG00000127481.10	UBR4	chr1	19401000	19536770	-	135770	2581	157	95	95.5925925925926	FALSE	94.1872771248871	-0.314394673873726	0.216681530683118	0.497634007705452	94.1872771248871	0.121166042591814	0.629766711322423	0.811306385638784	94.1872771248871	0.0992925801065071	0.693135519889978	0.795852557084236	94.1872771248871	0.0237203369897862	0.924663391634552	0.952320441129685	94.1872771248871	-0.0931215143254358	0.713649831914567	0.888105882403447	94.1872771248871	-0.0974025664089256	0.701602972217948	0.83314766953477	94.1872771248871	-0.0124032210460546	0.960854912201645	0.977202973971847	94.1872771248871	-0.0480746385617524	0.850077762821054	0.90758031964771	94.1872771248871	0.22127315954829	0.387176328285394	0.998625307316004	94.1872771248871	-0.218568609000739
ENSG00000127463.9	EMC1	chr1	19542158	19578046	-	35888	7771	531	279	287.814814814815	FALSE	282.985705749623	0.221284476246376	0.151268678129427	0.415768150804938	282.985705749623	-0.100635838948127	0.521153920527567	0.738945865295669	282.985705749623	0.467045995491	0.00236742502770672	0.0100077066963497	282.985705749623	0.241102903719122	0.117336295789666	0.215914335139154	282.985705749623	0.0244922309146208	0.875426606032745	0.956310591822569	282.985705749623	0.349690618570517	0.0236431561456553	0.09690640475567	282.985705749623	0.591059141858064	0.000112980661606801	0.000878343096271243	282.985705749623	0.278847701314821	0.072506705594448	0.154137460744561	282.985705749623	-0.196792245331755	0.202248576850437	0.998625307316004	282.985705749623	0.450326457518644
ENSG00000053372.4	MRTO4	chr1	19578033	19586622	+	8589	6763	446	232	250.481481481481	FALSE	245.161277906074	-0.590862759771571	9.73939158455737e-05	0.00527708741587664	245.161277906074	-0.446854561184931	0.00318350094476065	0.0291562449711768	245.161277906074	-0.661522184111492	1.52881548804232e-05	0.000136259322234143	245.161277906074	-0.665342746142916	1.18798116313157e-05	9.2437833761709e-05	245.161277906074	-0.727588561564204	2.17367861836738e-06	0.000333022555220906	245.161277906074	-0.64075420786524	2.89777606560003e-05	0.000665365326070332	245.161277906074	-0.599214712048216	8.55558881516391e-05	0.000697366172429054	245.161277906074	-0.531997529254039	0.000502573953029261	0.00277383363143976	245.161277906074	-0.136725801792633	0.381043233666457	0.998625307316004	245.161277906074	-0.193899646680309
ENSG00000053371.8	AKR7A2	chr1	19630459	19638640	-	8181	6499	571	205	240.703703703704	FALSE	234.326380191758	-0.469459273921765	0.0141314525798388	0.114992754234842	234.326380191758	-0.564033310786963	0.00337171905911335	0.030386506652415	234.326380191758	-0.653162761609061	0.000709542581888895	0.00368928928184009	234.326380191758	-1.08759434022223	2.27554073337032e-08	3.26663246473807e-07	234.326380191758	-0.416011718279669	0.0300723792306108	0.183406425424302	234.326380191758	-0.849676938058966	1.24568218441297e-05	0.000349183971315258	234.326380191758	-0.690361566794433	0.00035093210341176	0.00224991534698189	234.326380191758	-0.856502679944992	1.1111950299061e-05	0.000106205090510361	234.326380191758	0.0534475556420964	0.78206075609877	0.998625307316004	234.326380191758	-0.285643627272003
ENSG00000040487.8	PQLC2	chr1	19638820	19655794	+	16974	1100	70	40	40.7407407407407	FALSE	39.9221807393312	-0.0230881755530046	0.934204227779166	0.970345496594062	39.9221807393312	0.0917182929241416	0.742993073540937	0.873530318199296	39.9221807393312	0.158090282317551	0.570482067003082	0.697962776729917	39.9221807393312	0.347977065141357	0.201193466135937	0.325469714196967	39.9221807393312	-0.172330257424737	0.547781264582879	0.797985327703037	39.9221807393312	-0.322977912181033	0.268081709979812	0.475673736996927	39.9221807393312	-0.258012411365978	0.370327041284492	0.526771917786968	39.9221807393312	0.600718892025828	0.0276098629810805	0.072883641587633	39.9221807393312	-0.149242081871733	0.600368630155711	NA	39.9221807393312	-0.414696205105174
ENSG00000077549.13	CAPZB	chr1	19665267	19812066	-	146799	56444	3487	2022	2090.51851851852	FALSE	2051.77300984661	0.388241481347789	0.050463767898725	0.232101988378918	2051.77300984661	0.764475218435575	0.000116139266953407	0.00251710616133653	2051.77300984661	0.651203702292985	0.00103048912428222	0.00501749389499826	2051.77300984661	0.559385501460558	0.00480458883674495	0.0167294578382898	2051.77300984661	0.464382467632921	0.0193331362737464	0.143005916854644	2051.77300984661	0.578117930743496	0.00358437345027894	0.0266378043013666	2051.77300984661	0.861573627452081	1.39531969240094e-05	0.000149383262490057	2051.77300984661	0.402993742541255	0.0424836518119744	0.101887406147509	2051.77300984661	0.0761409862851322	0.700821626472256	0.998625307316004	2051.77300984661	-0.18635728769208
ENSG00000173436.9	MINOS1	chr1	19923477	19956314	+	32837	2926	169	103	108.37037037037	FALSE	106.451659186804	-0.294728240318806	0.132477438463454	0.385712489576097	106.451659186804	0.0728835674406387	0.705935167328649	0.853692420095085	106.451659186804	-0.0116258730175101	0.952257120653363	0.972839362396618	106.451659186804	-0.262009577304288	0.179498070221957	0.299181624583193	106.451659186804	-0.0215940905379313	0.911614070698239	0.972227872326518	106.451659186804	-0.225325759636008	0.25375713978641	0.45893695316659	106.451659186804	-0.118864608199213	0.542869730882124	0.684343939369918	106.451659186804	-0.0425277421811436	0.828156243010992	0.892874293576667	106.451659186804	0.273134149780875	0.164820336477299	0.985126099538007	106.451659186804	-0.298209327076646
ENSG00000158747.9	NBL1	chr1	19967048	19984945	+	17897	2521	187	83	93.3703703703704	FALSE	91.9406123096107	-0.151954911402545	0.473104296491265	0.718584523661955	91.9406123096107	0.437347712540877	0.0326990760034113	0.143630246844445	91.9406123096107	1.00206911424498	4.6336663595257e-07	6.09996433640673e-06	91.9406123096107	0.978801636497268	7.2869445349411e-07	7.45129909522286e-06	91.9406123096107	0.22514415313685	0.279592803052788	0.589993267140128	91.9406123096107	0.186435538759802	0.373189025291711	0.584757129032295	91.9406123096107	0.600113839235543	0.00309641520893178	0.0136599391454845	91.9406123096107	0.378614429613224	0.0679325033802886	0.146623324031393	91.9406123096107	0.377099064539395	0.0711498820032545	0.92127723468883	91.9406123096107	-0.250912173781074
ENSG00000162542.9	TMCO4	chr1	20008706	20126438	-	117732	1522	84	55	56.3703703703704	FALSE	55.3931383382779	-0.442929843455744	0.0451282381822189	0.219130887697922	55.3931383382779	-0.286159143322039	0.194033270215034	0.428367612206407	55.3931383382779	-0.238224091824836	0.278316987688826	0.419173686881849	55.3931383382779	-0.369915276556323	0.0915673101618684	0.178819691767339	55.3931383382779	-0.504450625659032	0.0252504494444133	0.165958205446048	55.3931383382779	-0.489043295202422	0.0303592143726469	0.114020278493381	55.3931383382779	-0.483841656363403	0.0309833166491085	0.0837813354042775	55.3931383382779	-0.636547746620948	0.00580454610735038	0.0211217021744126	55.3931383382779	-0.0615207822032884	0.789893118051277	NA	55.3931383382779	-0.202884151880383
ENSG00000169914.5	OTUD3	chr1	20209006	20239438	+	30432	1136	58	42	42.0740740740741	FALSE	41.735008657688	0.441319416500569	0.1026410347313	0.331902559906235	41.735008657688	0.388479707055373	0.156048730346589	0.375659514741405	41.735008657688	0.477878362617551	0.0792781558322666	0.163373305363061	41.735008657688	0.442563572853293	0.100975948668039	0.192837369409886	41.735008657688	0.630893317451135	0.0193315126802328	0.143005916854644	41.735008657688	0.511280513189944	0.0609217317925365	0.181722225145512	41.735008657688	0.489025024009595	0.0720612088566198	0.161050277137808	41.735008657688	0.569630136335966	0.0368847362543755	0.0911914263581683	41.735008657688	0.189573900950566	0.459410050355173	NA	41.735008657688	0.122800806134571
ENSG00000162545.5	CAMK2N1	chr1	20808884	20812713	-	3829	1807	157	61	66.9259259259259	FALSE	65.5859665467308	0.274985070868544	0.253707124049727	0.535854418189305	65.5859665467308	0.671343321856642	0.00459460242819881	0.0379791973739299	65.5859665467308	0.264477566583587	0.277023517067533	0.417579469493146	65.5859665467308	0.27738653905466	0.248657331342862	0.38148636849321	65.5859665467308	0.244434100704617	0.316579363796529	0.623959293436363	65.5859665467308	0.703969314853659	0.00302209917231161	0.0235771494689736	65.5859665467308	1.09250218107118	2.4960421614086e-06	3.26173980092306e-05	65.5859665467308	0.440744431373178	0.0689740535566034	0.148272095507151	65.5859665467308	-0.030550970163927	0.897449782915061	0.998625307316004	65.5859665467308	0.0326259929970163
ENSG00000090432.5	MUL1	chr1	20825943	20834654	-	8711	3854	233	132	142.740740740741	FALSE	139.870335186501	-0.429862119909389	0.0216563150903656	0.148011921660536	139.870335186501	-0.153509012258002	0.408994322247385	0.650031040509795	139.870335186501	-0.380223646780642	0.0430724903283295	0.102146290114101	139.870335186501	-0.447099195448712	0.0168658571397464	0.0469370518458462	139.870335186501	-0.19034285036228	0.307369298765795	0.615708653929859	139.870335186501	-0.660522342357549	0.000560638826746472	0.00654643444739705	139.870335186501	-0.63399484348324	0.000873186370730866	0.00477161106955357	139.870335186501	-0.496343586438579	0.00910690435912631	0.0303426892145468	139.870335186501	0.239519269547109	0.205006698184045	0.998625307316004	139.870335186501	-0.507013330099547
ENSG00000158825.5	CDA	chr1	20915441	20945401	+	29960	3040	193	111	112.592592592593	FALSE	110.900719435909	-0.18944443395923	0.384341736079311	0.655268738833606	110.900719435909	0.471226755601904	0.0268670762073442	0.125872743783683	110.900719435909	0.305175943706427	0.154421224773783	0.271016326399534	110.900719435909	-0.239366372805913	0.272224400372658	0.406949625140196	110.900719435909	-0.208020172543915	0.343841218293027	0.648286243528929	110.900719435909	0.0398871109338425	0.854406078562825	0.923900021063549	110.900719435909	0.203907367187903	0.343341502881732	0.499825130178092	110.900719435909	-0.0614566211044249	0.779169796632392	0.858593343517973	110.900719435909	-0.0185757385846846	0.932884644332824	0.998625307316004	110.900719435909	-0.431339644668061
ENSG00000158828.5	PINK1	chr1	20959948	20978004	+	18056	32876	1991	1158	1217.62962962963	FALSE	1197.14708002939	0.217730726871569	0.0388236913524397	0.204134509679159	1197.14708002939	0.51760816287453	8.36775770360624e-07	5.02404695636791e-05	1197.14708002939	0.982329407745185	4.82375282198673e-21	5.56673604885377e-19	1197.14708002939	0.371677649188309	0.000402594785462392	0.0020075517753192	1197.14708002939	0.0452591791680033	0.669743953330849	0.863014032670813	1197.14708002939	0.590383018247628	1.90785352406893e-08	1.80353046966772e-06	1197.14708002939	0.567590991327472	6.44712706711465e-08	1.2400253488827e-06	1197.14708002939	0.132030286983417	0.21354432570651	0.348303024638041	1197.14708002939	-0.172471547703565	0.10169936028889	0.952520245483062	1197.14708002939	0.0727748553730986
ENSG00000244038.5	DDOST	chr1	20978270	20988000	-	9730	16180	834	571	599.259259259259	FALSE	590.525167613098	0.310846808809224	0.0256696718656007	0.163795174185471	590.525167613098	0.533277793499759	0.000125439175090938	0.00267302760157813	590.525167613098	0.623143224627348	7.15210427139681e-06	7.07723814650691e-05	590.525167613098	0.690686371530951	5.84416851604166e-07	6.09581957918438e-06	590.525167613098	0.410491750023564	0.00325283068958783	0.0491050382905702	590.525167613098	0.36124817456211	0.00975081310648258	0.0534190661308288	590.525167613098	0.562895380056248	5.12457864077601e-05	0.000444263471238396	590.525167613098	0.746613908763358	7.48451954966712e-08	1.25485737204419e-06	590.525167613098	0.0996449412143399	0.470253413013407	0.998625307316004	590.525167613098	-0.172029618937649
ENSG00000189410.7	SH2D5	chr1	21046225	21059330	-	13105	817	60	28	30.2592592592593	FALSE	29.4001930074221	0.0532885601620532	0.870028243019976	0.939435533162941	29.4001930074221	0.0299930772596915	0.92747685827872	0.967060147234722	29.4001930074221	0.811028196475006	0.0093063962431443	0.0300824434400074	29.4001930074221	0.232034129099326	0.469114338745653	0.606246366214932	29.4001930074221	0.110644858832058	0.736150671352995	0.898001583337941	29.4001930074221	0.369871602111646	0.251317852172772	0.456036437493823	29.4001930074221	0.517970413313326	0.102800583855456	0.210432155756641	29.4001930074221	0.163243616743932	0.620481078161522	0.740840471656284	29.4001930074221	0.0573562986700044	0.859412733205987	NA	29.4001930074221	0.339878524851954
ENSG00000127483.13	HP1BP3	chr1	21069154	21113816	-	44662	14681	863	546	543.740740740741	FALSE	536.219854285024	0.321678195701255	0.0550238342973294	0.243254622669686	536.219854285024	0.372268752083045	0.0265738478932636	0.124939265809281	536.219854285024	0.421058602439735	0.0120689241271542	0.0371216544804057	536.219854285024	0.0914979265258658	0.586448051811904	0.70746366934572	536.219854285024	0.466316055807123	0.00541994296448908	0.0672648228805168	536.219854285024	0.53252510453172	0.00148740527683235	0.0138243735845741	536.219854285024	0.637854144730495	0.000136741781325646	0.00102886322511405	536.219854285024	0.240949979496869	0.152952741482608	0.271664613394854	536.219854285024	0.144637860105868	0.38474665014141	0.998625307316004	536.219854285024	0.160256352448675
ENSG00000075151.15	EIF4G3	chr1	21132963	21503377	-	370414	5424	282	202	200.888888888889	FALSE	197.624043118816	-0.149002857613273	0.227867493822608	0.508207841061765	197.624043118816	-0.0295469116355498	0.810968190353408	0.909537213111243	197.624043118816	-0.0448669176438899	0.717140992098546	0.813235688589546	197.624043118816	0.0272728382338431	0.822605275351394	0.882917076551817	197.624043118816	-0.150945738444502	0.228019528938563	0.533205666881071	197.624043118816	0.137908412506753	0.260725000683316	0.467003095358182	197.624043118816	0.134270556178134	0.271245612235096	0.42293183195667	197.624043118816	0.102893204302087	0.405062032323474	0.55400665218199	197.624043118816	-0.00194288083122932	0.987659079078827	0.998726332951763	197.624043118816	0.167455324142302
ENSG00000117298.10	ECE1	chr1	21543740	21671997	-	128257	17234	935	631	638.296296296296	FALSE	625.015427373903	-0.257250025901287	0.0888903652900203	0.308185636350808	625.015427373903	-0.184891026605436	0.221879712287099	0.462573097305272	625.015427373903	0.0206721052575376	0.891011272134017	0.931750804885014	625.015427373903	-0.110578057341207	0.463366737374745	0.600828371269806	625.015427373903	-0.198880610889355	0.189160436633493	0.491172358877946	625.015427373903	-0.274571171271815	0.0704526153426579	0.200171908971226	625.015427373903	0.0578442407363132	0.701276364925115	0.809170315585706	625.015427373903	-0.383390094054289	0.0118244269407006	0.0374449564571292	625.015427373903	0.0583694150119314	0.700614052354282	0.998625307316004	625.015427373903	-0.089680144666379
ENSG00000142794.14	NBPF3	chr1	21766621	21811498	+	44877	1482	95	53	54.8888888888889	FALSE	53.8953258526152	0.0734713778621371	0.78673917737961	0.902992034383262	53.8953258526152	0.118518757128091	0.663805463553552	0.830587500170173	53.8953258526152	0.121844143252619	0.655107149566878	0.765427068649027	53.8953258526152	-0.186763321854899	0.497151424409051	0.631225287036808	53.8953258526152	0.233227443369057	0.390326916593771	0.686506370489799	53.8953258526152	-0.180388177497068	0.517522460158142	0.703058336793341	53.8953258526152	-0.227492665384189	0.413904311592762	0.56644905479952	53.8953258526152	-0.366112336091893	0.196877851600669	0.328228253156387	53.8953258526152	0.159756065506919	0.552227291720171	NA	53.8953258526152	-0.298906934625159
ENSG00000090686.11	USP48	chr1	22004791	22110099	-	105308	17130	845	623	634.444444444444	FALSE	625.001231380281	-0.0395431171433647	0.752294829828967	0.886590432076949	625.001231380281	-0.190801893298451	0.130435336412763	0.338013531456347	625.001231380281	0.193475737548338	0.121722685168725	0.226899051900418	625.001231380281	-0.118889902135013	0.343225172579338	0.483192577680532	625.001231380281	0.0224690510092448	0.85797852506693	0.949115382933973	625.001231380281	0.0679068004426987	0.588560705493563	0.758073696045195	625.001231380281	-0.131514552736884	0.296566755724375	0.449555133293551	625.001231380281	-0.0988122959577574	0.433900223440179	0.580930749659398	625.001231380281	0.0620121681526095	0.620806261043535	0.998625307316004	625.001231380281	0.25870869374115
ENSG00000142798.12	HSPG2	chr1	22148738	22263790	-	115052	1409	119	44	52.1851851851852	FALSE	51.0370305202289	-0.249697392601189	0.452181436833961	0.705923582865272	51.0370305202289	-0.737003929878053	0.0301852401366748	0.135741925027577	51.0370305202289	-0.0482352563312126	0.884293814266103	0.927793564232798	51.0370305202289	-2.14442262924337	6.71374967635603e-09	1.03753703694086e-07	51.0370305202289	-0.700800885803744	0.0392388572663889	0.214465598629322	51.0370305202289	-0.53004308878751	0.116760742300218	0.276676254954596	51.0370305202289	-0.290273472881552	0.384930467431496	0.540447485162945	51.0370305202289	-1.5773122405907	1.23755167559433e-05	0.000117112717671259	51.0370305202289	-0.451103493202555	0.186206809054477	NA	51.0370305202289	0.206960841090543
ENSG00000070831.11	CDC42	chr1	22379120	22419437	+	40317	12855	720	451	476.111111111111	FALSE	466.619171937591	0.221573273367082	0.103625850712471	0.333388598635417	466.619171937591	0.354174573246982	0.00927473253083911	0.0622663178895261	466.619171937591	0.264538845691344	0.0525135822289627	0.119191747557232	466.619171937591	0.0365572632533397	0.789084069554232	0.862036026808323	466.619171937591	0.175132445875277	0.200546267934123	0.504019955127221	466.619171937591	-0.0816863774636144	0.553883469029661	0.730238650711806	466.619171937591	-0.0135085950241585	0.921723108856362	0.955821162947559	466.619171937591	-0.299194738301441	0.0317648689588199	0.081602378019102	466.619171937591	-0.0464408274918047	0.732062754116769	0.998625307316004	466.619171937591	-0.435860950710596
ENSG00000184677.12	ZBTB40	chr1	22778344	22857650	+	79306	2888	149	114	106.962962962963	FALSE	105.151289052106	0.591421896858576	0.000276373435896317	0.0101481584767549	105.151289052106	0.259199527939687	0.124337377761228	0.328632343481938	105.151289052106	0.359830965570255	0.0316102076070767	0.0792127199087658	105.151289052106	0.70489566041516	1.20412144246762e-05	9.36117509865907e-05	105.151289052106	0.632562430887928	0.000115022939855266	0.00541089805430867	105.151289052106	0.625542887199716	0.000143778469857378	0.00232716845747298	105.151289052106	0.273571124583885	0.104476806188075	0.213091666568573	105.151289052106	0.576947962397765	0.000512118715091047	0.00281776278780126	105.151289052106	0.0411405340293523	0.78827607742495	0.998625307316004	105.151289052106	0.366343359260029
ENSG00000133216.12	EPHB2	chr1	23037332	23241818	+	204486	2146	186	75	79.4814814814815	FALSE	76.8998614490725	-0.243408768902996	0.217780664199773	0.499535101207843	76.8998614490725	-0.5068801902303	0.0127969272592104	0.0778326458763475	76.8998614490725	-1.29268755536921	5.8626761394177e-09	1.17597607618207e-07	76.8998614490725	0.536160847722447	0.00443748374556556	0.0156350041883805	76.8998614490725	0.0576639688443936	0.768032524534538	0.911374330073885	76.8998614490725	-0.289979464285032	0.149393423640303	0.325849278956243	76.8998614490725	-0.956283595471102	7.10380842880497e-06	8.27319026190838e-05	76.8998614490725	-0.39001846566902	0.0558776552927825	0.125926666226646	76.8998614490725	0.30107273774739	0.127106586044488	0.975431061423351	76.8998614490725	0.216900725945268
ENSG00000004487.11	KDM1A	chr1	23345941	23410182	+	64241	1994	119	71	73.8518518518518	FALSE	72.3489586102448	0.222500500813026	0.241208170498708	0.523538248548722	72.3489586102448	0.5929796558265	0.00146285422839836	0.0169710590053512	72.3489586102448	-0.00397262820467836	0.983813990626403	0.991383398540863	72.3489586102448	-0.0308117921985863	0.873466441117792	0.917557961434295	72.3489586102448	0.261051521141293	0.173170546604595	0.468876040524541	72.3489586102448	-0.0592864040944949	0.764580677188635	0.870371582686043	72.3489586102448	0.142846619008138	0.45924600113604	0.609356423188719	72.3489586102448	-0.165302954241542	0.412092903449436	0.561462364313353	72.3489586102448	0.0385510203282668	0.835883078732521	0.998625307316004	72.3489586102448	-0.652266059920995
ENSG00000169641.9	LUZP1	chr1	23410516	23504301	-	93785	4900	267	184	181.481481481481	FALSE	178.025157745927	0.107374231775639	0.452669732647284	0.705923582865272	178.025157745927	-0.0705012275730581	0.628339096351165	0.810130761778359	178.025157745927	-0.193145743946088	0.188972954384915	0.315582347803863	178.025157745927	0.258439776111896	0.0679876956093798	0.141816587602101	178.025157745927	-0.0213804635558997	0.883186524700122	0.958870201763144	178.025157745927	0.0412243827395706	0.776551136763981	0.878640389206055	178.025157745927	-0.253861932014423	0.0854677291956579	0.18340165216919	178.025157745927	0.256355246042982	0.0747453557905518	0.157989350988307	178.025157745927	-0.128754695331538	0.370014625637009	0.998625307316004	178.025157745927	0.111725610312629
ENSG00000125944.14	HNRNPR	chr1	23630264	23670829	-	40565	13938	705	523	516.222222222222	FALSE	508.487851422806	-0.00467660349176166	0.967394768645028	0.986602767609287	508.487851422806	-0.0858942522192415	0.455930590624734	0.689366002803304	508.487851422806	-0.305913467306733	0.0084813265154833	0.0278816967729708	508.487851422806	-0.250601520984201	0.0296744723439566	0.0736759782474695	508.487851422806	-0.00969820425488169	0.932801885375271	0.978414414870677	508.487851422806	-0.0585067721427714	0.612065132598359	0.775643292679552	508.487851422806	-0.0388278668791966	0.735757823840576	0.834814068128348	508.487851422806	-0.00994197422925288	0.931356620757599	0.958651098349592	508.487851422806	-0.00502160076312003	0.96505506981314	0.998726332951763	508.487851422806	0.0273874800764702
ENSG00000007968.6	E2F2	chr1	23832922	23857712	-	24790	533	32	21	19.7407407407407	FALSE	19.5233594351011	0.188403071621856	0.568233135458704	0.781386512176733	19.5233594351011	-0.0761333192958025	0.82361554558392	0.917353689904576	19.5233594351011	-1.02334169284531	0.00787577412192472	0.026290055915636	19.5233594351011	-0.628909397542642	0.0784140375202719	0.158396712299417	19.5233594351011	0.411020190722917	0.210688927569193	0.515326675028861	19.5233594351011	-0.0245680812085503	0.942794124982003	0.970322387693407	19.5233594351011	-0.803630895789226	0.0307516353392648	0.0833106803733863	19.5233594351011	-0.0468372204238692	0.892147792868341	0.934932649701984	19.5233594351011	0.222617119101061	0.485767263335015	NA	19.5233594351011	0.0515652380872522
ENSG00000117318.8	ID3	chr1	23884409	23886285	-	1876	12744	834	497	472	FALSE	460.925529442438	0.329850251896752	0.0325869809968275	0.189012998131729	460.925529442438	0.095111028634359	0.540185665034752	0.752466908169889	460.925529442438	-0.17617504583322	0.259216732116247	0.397786388194103	460.925529442438	-0.0548499166679729	0.72386546435978	0.816070605975768	460.925529442438	0.331910984856487	0.0319190569228502	0.190223246904156	460.925529442438	-0.0762199584262613	0.625152996441116	0.782927074110742	460.925529442438	-1.09231643376559	1.01633502135695e-11	4.28016729847291e-10	460.925529442438	-1.35805678387117	9.13130009662535e-17	6.70584567426552e-15	460.925529442438	0.0020607329597353	0.989291329731227	0.999109507644424	460.925529442438	-0.17133098706062
ENSG00000142676.8	RPL11	chr1	24018269	24022915	+	4646	73937	3915	2648	2738.40740740741	FALSE	2693.34826024379	0.0489390958164041	0.65159883179465	0.833136635119822	2693.34826024379	-0.192159269242195	0.0770569914158316	0.245862989486923	2693.34826024379	0.0300763401294038	0.781621328921806	0.858209209044751	2693.34826024379	-0.136665768220804	0.207818582835554	0.333214710768086	2693.34826024379	-0.132262113552889	0.223492347646404	0.528600745591149	2693.34826024379	0.117650069848542	0.278109133486793	0.486679663163458	2693.34826024379	-0.0393358758769462	0.7170982427554	0.821993424901072	2693.34826024379	-0.00431780809405454	0.968292719106711	0.981659908954049	2693.34826024379	-0.181201209369294	0.0949999805329142	0.950870257346934	2693.34826024379	0.309809339090737
ENSG00000011007.8	TCEB3	chr1	24069645	24088549	+	18904	6270	328	223	232.222222222222	FALSE	228.065562906155	0.349286865540376	0.0285652106712793	0.174814367785804	228.065562906155	0.315662387369033	0.0492738547474356	0.186397391777656	228.065562906155	0.397855006916438	0.012932369337805	0.0391540270605231	228.065562906155	0.594577678600379	0.000168006807540102	0.000946676278884811	228.065562906155	0.329094865622889	0.0405224335130231	0.218764517855826	228.065562906155	0.407240937626943	0.0111110949225075	0.0583529488660766	228.065562906155	0.360120111301484	0.0246755524799896	0.0702481179942895	228.065562906155	0.365664558625313	0.0232061570380818	0.0638223186135545	228.065562906155	-0.0201919999174862	0.897901117829159	0.998625307316004	228.065562906155	0.0915785502579109
ENSG00000057757.5	PITHD1	chr1	24104895	24114722	+	9827	4795	260	169	177.592592592593	FALSE	174.393008441587	-0.0776566277006872	0.563974323520194	0.778784124133714	174.393008441587	-0.297652361778981	0.0308328429065252	0.138025512376515	174.393008441587	-0.279691939660199	0.0424068419123092	0.100675179597323	174.393008441587	-0.582451224298553	2.94038825828006e-05	0.000208460344457765	174.393008441587	0.0251822690603581	0.852089512436172	0.947633386826811	174.393008441587	-0.088674378933016	0.515790784822298	0.702316413412648	174.393008441587	-0.050349221388655	0.71016720273465	0.815948508339812	174.393008441587	-0.503482054968075	0.000387930728231832	0.00223009020982391	174.393008441587	0.102838896761045	0.445460187680124	0.998625307316004	174.393008441587	0.208977982845965
ENSG00000011009.6	LYPLA2	chr1	24117460	24122029	+	4569	14253	948	498	527.888888888889	FALSE	516.172271695445	0.0339689185272887	0.802907861151831	0.909593558648878	516.172271695445	0.349024127006898	0.00999492016875655	0.0656684845862396	516.172271695445	0.745653417915438	2.91076637662954e-08	4.94552008082793e-07	516.172271695445	0.430088277894244	0.00142139513655103	0.00593539341324834	516.172271695445	0.0315254885265822	0.817586706300933	0.932974890482867	516.172271695445	0.00418351900096123	0.975627949851371	0.986269622418549	516.172271695445	0.00289147042716386	0.983127132129451	0.990317943021523	516.172271695445	-0.146367043403013	0.288335057970471	0.434188328270734	516.172271695445	-0.00244343000070654	0.985681151810213	0.998726332951763	516.172271695445	-0.344840608005937
ENSG00000117308.10	GALE	chr1	24122089	24127271	-	5182	4607	250	167	170.62962962963	FALSE	167.267785861515	0.2174562499687	0.145259898078972	0.406544710025117	167.267785861515	0.445164734094148	0.00270776781316345	0.0260609727283531	167.267785861515	0.120939484523232	0.424376354613516	0.569724775207087	167.267785861515	0.218108679379318	0.143418199335072	0.252140765228944	167.267785861515	-0.0388947361523522	0.799696512273017	0.926115593967606	167.267785861515	0.150677944617204	0.320489262684183	0.531814675669776	167.267785861515	0.0325209457939407	0.830819554146768	0.898243406515169	167.267785861515	0.267221973187623	0.0770570195593977	0.161797891258225	167.267785861515	-0.256350986121052	0.0879300425756697	0.947349530467335	167.267785861515	-0.294486789476945
ENSG00000117305.10	HMGCL	chr1	24128375	24165110	-	36735	1733	102	65	64.1851851851852	FALSE	63.6175794441966	-0.188130218286417	0.356549017249953	0.63176362258885	63.6175794441966	-0.126945579687734	0.535865096509326	0.749873582296358	63.6175794441966	0.234615875946865	0.238679566376257	0.374536635681486	63.6175794441966	-0.179786103168583	0.376763390034072	0.517133068248804	63.6175794441966	-0.209673318098149	0.312288579590532	0.620436568970483	63.6175794441966	-0.0639811010979234	0.755283590684712	0.864431992120602	63.6175794441966	-0.24244572621213	0.242452895909269	0.393603236355748	63.6175794441966	0.151463511670729	0.454474848088757	0.599979720712627	63.6175794441966	-0.0215430998117322	0.917870711427692	0.998625307316004	63.6175794441966	0.0629644785898104
ENSG00000179163.11	FUCA1	chr1	24171567	24194784	-	23217	2663	178	89	98.6296296296296	FALSE	97.0533738341409	0.46668051438029	0.0151766486872639	0.120195811261165	97.0533738341409	-0.127911166405704	0.529083831046178	0.744145301984709	97.0533738341409	0.626997717897389	0.00108266200817261	0.00522149095266714	97.0533738341409	1.16386463362302	3.14564580846943e-10	6.30975364651452e-09	97.0533738341409	0.250382908715986	0.204609317816016	0.508575775695978	97.0533738341409	0.333700539701294	0.0896748131360499	0.234712927695711	97.0533738341409	0.563324185098089	0.00343804424570951	0.0148303209550363	97.0533738341409	1.04439931770017	3.04329467966437e-08	5.58733812468958e-07	97.0533738341409	-0.216297605664304	0.251601658673455	0.998625307316004	97.0533738341409	0.461611706106998
ENSG00000189266.7	PNRC2	chr1	24285599	24289952	+	4353	3086	176	113	114.296296296296	FALSE	112.289757127857	0.123405340675861	0.543557367614463	0.765852226834631	112.289757127857	-0.41265583516798	0.0489549934356257	0.185507066809795	112.289757127857	-0.422577450290702	0.0440191559364386	0.103975071677617	112.289757127857	0.0110493827876279	0.956769755920894	0.973420660764032	112.289757127857	-0.0757042102251592	0.713614878938034	0.888105882403447	112.289757127857	-0.310402204589743	0.137850904780917	0.308373512351611	112.289757127857	-0.499862369856422	0.0176960730220389	0.0543356271160463	112.289757127857	-0.166483757543486	0.424031831505024	0.572462299415625	112.289757127857	-0.199109550901021	0.329773754149577	0.998625307316004	112.289757127857	0.102253630578237
ENSG00000188529.10	SRSF10	chr1	24291294	24307417	-	16123	11860	614	441	439.259259259259	FALSE	432.836378488966	-0.102070140649938	0.375194368850589	0.64800333558918	432.836378488966	-0.249440548297833	0.0320980111792861	0.141831391018964	432.836378488966	-0.300834825211413	0.00994515303911495	0.0317088733066291	432.836378488966	-0.2889187769399	0.0126158897116581	0.0371784550963073	432.836378488966	-0.0851109890557148	0.462069482889798	0.738888706884529	432.836378488966	-0.0473820909337194	0.682214160880183	0.820985242901043	432.836378488966	-0.130591140570167	0.259605104989561	0.410510028688476	432.836378488966	-0.0225258682834073	0.845890176742115	0.905393894306243	432.836378488966	0.0169591515942233	0.883452292862329	0.998625307316004	432.836378488966	0.202058457364114
ENSG00000001461.12	NIPAL3	chr1	24742284	24799466	+	57182	4275	312	146	158.333333333333	FALSE	154.972493097959	-0.0585932852843883	0.670717182139251	0.84383305684403	154.972493097959	0.338130955168448	0.0120707892651307	0.074538591667791	154.972493097959	0.812436292727775	5.03299337603876e-10	1.27416464784845e-08	154.972493097959	-0.409726557190081	0.00394177180938519	0.0141578756257869	154.972493097959	-0.0334523092343649	0.810410294568711	0.930930898550799	154.972493097959	0.221642774672941	0.10505545606976	0.25816448634842	154.972493097959	0.724184754760276	3.47437691414182e-08	7.09731339288833e-07	154.972493097959	-0.680804800923439	7.13285887357578e-06	7.17809557764375e-05	154.972493097959	0.0251409760500234	0.856310064029766	0.998625307316004	154.972493097959	-0.116488180495507
ENSG00000117602.7	RCAN3	chr1	24829387	24867530	+	38143	856	52	31	31.7037037037037	FALSE	31.2448289814507	-0.0587085191911436	0.822642080702128	0.918456782148399	31.2448289814507	0.374736099147989	0.139339894937653	0.351707016834996	31.2448289814507	0.492265617624377	0.0500576597679248	0.114760672006651	31.2448289814507	-0.439234263406297	0.107919207432679	0.202699234252121	31.2448289814507	-0.0211687059167672	0.936432284482577	0.979232506216858	31.2448289814507	0.0992388538585194	0.705689136345719	0.835098370697571	31.2448289814507	0.132117347024331	0.611005194078425	0.740910501443898	31.2448289814507	-0.507308495692702	0.076883997577606	0.161625550620915	31.2448289814507	0.0375398132743763	0.886940352816115	NA	31.2448289814507	-0.275497245289469
ENSG00000133226.12	SRRM1	chr1	24958207	24999758	+	41551	15827	827	601	586.185185185185	FALSE	578.139844261195	-0.246898738416724	0.128804107036019	0.379326813512999	578.139844261195	-0.29005458315363	0.0751500882966979	0.240816330546144	578.139844261195	-0.376865507011806	0.0209647229526343	0.057092408261449	578.139844261195	-0.506520054574136	0.0019051818948955	0.00762931334747246	578.139844261195	-0.1286380683951	0.428999380737775	0.715750750513682	578.139844261195	-0.105310285854951	0.517415682222485	0.703058336793341	578.139844261195	-0.256893364233466	0.114867944296743	0.22927146294269	578.139844261195	-0.257987115981465	0.114013046466038	0.218497997352388	578.139844261195	0.118260670021624	0.467990992182108	0.998625307316004	578.139844261195	0.184744297298679
ENSG00000169504.10	CLIC4	chr1	25071848	25170815	+	98967	13108	813	487	485.481481481481	FALSE	475.572798021066	0.204463520482564	0.185051871453672	0.459835271179343	475.572798021066	0.44194898940699	0.00408223604412771	0.0346794928184692	475.572798021066	0.628671281230842	4.12845522112339e-05	0.000325674400427162	475.572798021066	0.79001180595293	2.20251780872867e-07	2.52536429011135e-06	475.572798021066	-0.0143666992301072	0.926524171353762	0.977717808332527	475.572798021066	0.418477359045063	0.00664890834711297	0.0408308220956779	475.572798021066	0.775602838036401	3.94530996574472e-07	6.38579678608517e-06	475.572798021066	0.610916677778296	7.08202353091528e-05	0.000525738187934112	475.572798021066	-0.218830219712671	0.156751562228186	0.97847337410396	475.572798021066	-0.0234716303619268
ENSG00000117614.5	SYF2	chr1	25549170	25558993	-	9823	6104	337	227	226.074074074074	FALSE	221.748226889298	0.094839069809913	0.437221147157114	0.69563959062455	221.748226889298	-0.0951077063949029	0.4457395384389	0.68125929455935	221.748226889298	-0.0821695510663866	0.510068872713189	0.647307253097722	221.748226889298	0.402492625945805	0.00077339959405808	0.00351530884542204	221.748226889298	0.0532842453144071	0.666675160497255	0.862151687119074	221.748226889298	-0.13276706671493	0.291247206510589	0.500972256494985	221.748226889298	-0.215304446266231	0.0873908525511464	0.186403052273041	221.748226889298	0.224389243536596	0.0682825032183132	0.147199981464806	221.748226889298	-0.0415548244955059	0.733415473197035	0.998625307316004	221.748226889298	-0.0376593603200275
ENSG00000117616.13	C1orf63	chr1	25568728	25664704	-	95976	7405	453	281	274.259259259259	FALSE	269.216843082098	0.832633673345252	1.31876902178449e-09	5.85929076378848e-07	269.216843082098	0.845782583425478	8.67685744552429e-10	1.57352153593732e-07	269.216843082098	0.966723973610165	1.89381385916682e-12	6.95389667461008e-11	269.216843082098	0.735222282566082	9.30205655916797e-08	1.16890697297033e-06	269.216843082098	0.89687651608165	7.62135649353886e-11	6.77233738015863e-08	269.216843082098	0.744345855142128	8.58952039506146e-08	6.36053985254301e-06	269.216843082098	1.06724035690205	5.91631190505377e-15	4.01315630445098e-13	269.216843082098	0.505224282353364	0.000348476994602133	0.00204393833269607	269.216843082098	0.0642428427363978	0.621473871246609	0.998625307316004	269.216843082098	-0.10143672828335
ENSG00000183726.6	TMEM50A	chr1	25664408	25688852	+	24444	7169	390	260	265.518518518519	FALSE	258.881920485855	0.290225635597395	0.147687924394825	0.410021991930871	258.881920485855	0.0186403018622256	0.926532300535538	0.966674418522812	258.881920485855	-0.348199491430903	0.0881318211384144	0.177488796258187	258.881920485855	0.376699548569388	0.0597106270892288	0.128174876554244	258.881920485855	0.0488229337719615	0.809140934542281	0.930303741221869	258.881920485855	-0.0133693639290038	0.947394799396545	0.973242796235572	258.881920485855	0.105935085265423	0.599602219477923	0.731374786860786	258.881920485855	0.141662676636943	0.483457295210603	0.626696064951337	258.881920485855	-0.241402701825433	0.228447685500691	0.998625307316004	258.881920485855	-0.0320096657912294
ENSG00000204178.5	TMEM57	chr1	25757388	25826700	+	69312	2274	120	80	84.2222222222222	FALSE	82.907681848939	-0.0285594158160286	0.877511169275518	0.942076144760451	82.907681848939	0.13006461509663	0.48094852603346	0.708858617073035	82.907681848939	0.301127386022782	0.0982020683275159	0.19280238160811	82.907681848939	0.540931555687232	0.00220650429490508	0.00864887391465661	82.907681848939	0.105455428503804	0.570046309631544	0.810469041181744	82.907681848939	0.305041481411716	0.0954035405953295	0.243958521361179	82.907681848939	0.171445015565034	0.351313080040084	0.507811586598761	82.907681848939	0.466834054032347	0.0100839323546909	0.0329433172440379	82.907681848939	0.134014844319833	0.467060105748888	0.998625307316004	82.907681848939	0.174976866315086
ENSG00000157978.7	LDLRAP1	chr1	25870071	25895377	+	25306	4837	256	186	179.148148148148	FALSE	175.586319841726	-0.00251713694694013	0.986514654964485	0.994686170885557	175.586319841726	-0.124542901850376	0.409428348360854	0.6504580665401	175.586319841726	-0.0453763942896752	0.762843358451071	0.844635804616581	175.586319841726	-0.163478170662142	0.275815946027076	0.410467341550259	175.586319841726	0.134780067105297	0.365905162835032	0.668226421173286	175.586319841726	-0.221715732316854	0.146207987566439	0.321028954167377	175.586319841726	-0.246126319962232	0.105845641276941	0.215424729360261	175.586319841726	-0.34834107897173	0.0242667997600037	0.0660806960944174	175.586319841726	0.137297204052237	0.354186175123131	0.998625307316004	175.586319841726	-0.0971728304664779
ENSG00000162430.12	SEPN1	chr1	26126667	26144713	+	18046	1020	68	36	37.7777777777778	FALSE	37.2761302084612	-0.207377234255104	0.582855232672009	0.790477191307926	37.2761302084612	-0.319728500014637	0.401069845683399	0.643420590132278	37.2761302084612	-1.06827542943592	0.00681189584386109	0.0234432635432028	37.2761302084612	-1.1143245568621	0.0044945938059163	0.0157923924710843	37.2761302084612	-0.317180911290708	0.405315256498002	0.69760170719152	37.2761302084612	-0.53382321304909	0.16578317461085	0.349238799249765	37.2761302084612	-0.839270558382102	0.0313013984752785	0.0844140293934218	37.2761302084612	-1.0752215064355	0.00688616012596239	0.0242338292591294	37.2761302084612	-0.109803677035604	0.773932604936949	NA	37.2761302084612	-0.214094713034453
ENSG00000117640.13	MTFR1L	chr1	26145131	26159432	+	14301	1773	87	65	65.6666666666667	FALSE	64.9438007996898	0.385759150816646	0.0583262594011758	0.250743657977188	64.9438007996898	0.634090089920272	0.00164720154559924	0.0184577968905357	64.9438007996898	0.656359545934433	0.00111720561265451	0.00535463272602373	64.9438007996898	0.421188839921139	0.0376911260762382	0.0896475766363631	64.9438007996898	0.445390231590414	0.0302123436228473	0.183454413399595	64.9438007996898	0.467788892597603	0.0229630431351839	0.0950394044244268	64.9438007996898	0.617753426526809	0.00220486754092664	0.0103227949643719	64.9438007996898	0.595116512519707	0.00362159224661844	0.0142582388483585	64.9438007996898	0.0596310807737673	0.759629353034113	0.998625307316004	64.9438007996898	-0.166301197322669
ENSG00000127423.6	AUNIP	chr1	26158414	26185903	-	27489	928	75	33	34.3703703703704	FALSE	33.3641180246253	-0.0547872297184977	0.844593196745638	0.928728517050085	33.3641180246253	-0.563501149335978	0.0548123482687298	0.198315361040689	33.3641180246253	-0.824771859168713	0.00623020536255237	0.021847515726772	33.3641180246253	-0.70590360105181	0.0161387134822014	0.045253584096826	33.3641180246253	-0.0515437952744626	0.855180187785937	0.948639993904315	33.3641180246253	-0.504747778671994	0.0858335632322114	0.227754280196357	33.3641180246253	-0.731515247164348	0.0141930210543744	0.0457515122519926	33.3641180246253	-0.578485372043156	0.0520116684505614	0.119391392448485	33.3641180246253	0.00324343444403517	0.99080380484928	NA	33.3641180246253	0.0587533706639844
ENSG00000182749.5	PAQR7	chr1	26187701	26197744	-	10043	947	58	33	35.0740740740741	FALSE	34.5470290964018	0.212558707700425	0.454262849094376	0.70680785800256	34.5470290964018	-0.303936631829614	0.31337841895118	0.564180934273781	34.5470290964018	0.639020796770044	0.0214782620714208	0.0582055006912611	34.5470290964018	0.450958918070621	0.105333730992683	0.199360071054523	34.5470290964018	0.0350065267056773	0.904724303203741	0.968483334329411	34.5470290964018	0.287134684566336	0.316666718077149	0.52738266449254	34.5470290964018	0.399800143304895	0.157112023218397	0.290732494443707	34.5470290964018	0.211448630617606	0.466426866664158	0.610910841636989	34.5470290964018	-0.177552180994747	0.532432352805984	NA	34.5470290964018	0.59107131639595
ENSG00000117632.16	STMN1	chr1	26210672	26233482	-	22810	65924	3612	2415	2441.62962962963	FALSE	2405.71687440079	0.0268815309085296	0.717613487967947	0.86983114920703	2405.71687440079	-0.203854020578404	0.00641496483841784	0.0479826410388729	2405.71687440079	-0.213240112166757	0.00436478561635885	0.0163997822355031	2405.71687440079	-0.733356594747304	2.30250323575912e-22	2.46506551240428e-20	2405.71687440079	0.064526869088148	0.386209332192074	0.683772888196607	2405.71687440079	0.0764733062354164	0.304658227162385	0.516442771187515	2405.71687440079	0.0831341075543632	0.264000362092997	0.415278317854199	2405.71687440079	-0.279296831769425	0.000199639998782116	0.00127189645579966	2405.71687440079	0.0376453381796184	0.612405049400401	0.998625307316004	2405.71687440079	0.280327326813821
ENSG00000158006.9	PAFAH2	chr1	26286258	26324648	-	38390	689	40	25	25.5185185185185	FALSE	25.2304692332612	0.598215970181298	0.0673243691982334	0.27008774026885	25.2304692332612	0.168310362053169	0.621879927669289	0.806836769932735	25.2304692332612	0.646893606309427	0.0491832564293012	0.11328211939626	25.2304692332612	0.380763787361643	0.250646134586554	0.383742514117182	25.2304692332612	0.60102090327856	0.0689998589044252	0.291412902198062	25.2304692332612	-0.0655228797919867	0.852211245220925	0.922613661753064	25.2304692332612	0.015432569659032	0.964456333519815	0.97919021085247	25.2304692332612	0.351585997464584	0.301010719682954	0.447737069819673	25.2304692332612	0.0028049330972623	0.992780179015853	NA	25.2304692332612	-0.233833241845156
ENSG00000142684.7	ZNF593	chr1	26496362	26498551	+	2189	9043	613	337	334.925925925926	FALSE	326.016659799192	-0.386954861674179	0.00978094895105145	0.0935945059767549	326.016659799192	-0.39062091734873	0.00940296763200015	0.062775935670889	326.016659799192	-0.167136658604705	0.263242031801332	0.402680098913176	326.016659799192	-0.228029920674239	0.125832376991337	0.228007035470028	326.016659799192	-0.325664752627682	0.030174360128955	0.183446293407675	326.016659799192	-0.55104596653692	0.000279087740254325	0.00377469354627083	326.016659799192	-0.63772003671852	2.65949059616715e-05	0.000257139084844653	326.016659799192	-0.577255726786986	0.000148368698106323	0.000986829529470651	326.016659799192	0.061290109046497	0.685565176749968	0.998625307316004	326.016659799192	-0.160425049188191
ENSG00000130695.9	CEP85	chr1	26560691	26605299	+	44608	1444	87	51	53.4814814814815	FALSE	52.194435147099	0.471183281140194	0.073210968066365	0.281687688785933	52.194435147099	0.287136550135669	0.28336658851554	0.533021910573474	52.194435147099	0.169953680500148	0.528940717325934	0.664428500729184	52.194435147099	0.088921122300417	0.740535227789971	0.827353852620324	52.194435147099	0.568562558656188	0.0311564410892033	0.187571907532968	52.194435147099	0.373277146418086	0.162728416093826	0.344501715745459	52.194435147099	0.295943681386084	0.26880876019661	0.420608318913026	52.194435147099	0.0337009698959776	0.902468646861203	0.941228608906814	52.194435147099	0.0973792775159938	0.701172155933011	NA	52.194435147099	0.0861405962824167
ENSG00000142669.9	SH3BGRL3	chr1	26605667	26608007	+	2340	18844	1040	665	697.925925925926	FALSE	685.158934839614	-0.0789275918642167	0.58470806770142	0.791426639694564	685.158934839614	-0.0378155323838131	0.793707048838658	0.899885460611096	685.158934839614	0.13828707431783	0.337731374917298	0.482779925622875	685.158934839614	-0.568592223930762	9.35895601181406e-05	0.000568057944815435	685.158934839614	-0.350545437891279	0.0159482704174663	0.127672370206852	685.158934839614	-0.138456706831234	0.339617095451418	0.552101675946902	685.158934839614	-0.0243841384631111	0.866088860893614	0.923897433121327	685.158934839614	-0.753855228047317	2.9796382180275e-07	4.24993020953328e-06	685.158934839614	-0.271617846027063	0.0617124575514579	0.88803521302857	685.158934839614	-0.100641174447421
ENSG00000117682.12	DHDDS	chr1	26758773	26797785	+	39012	4210	215	155	155.925925925926	FALSE	152.879890009364	-0.00230854558726587	0.985954309068819	0.99434683808711	152.879890009364	-0.314435630688775	0.0208517224585255	0.107538250589935	152.879890009364	0.0667233338864085	0.612642990027116	0.731127016481363	152.879890009364	0.0580003462588838	0.656144563405204	0.763254429954005	152.879890009364	-0.15213976987476	0.258135659875824	0.56802629088544	152.879890009364	-0.0690029223586709	0.606451705497082	0.771389901953489	152.879890009364	-0.366941378210378	0.00732792715317858	0.0272223915899435	152.879890009364	-0.300281712034598	0.0293090150558946	0.0763977435572542	152.879890009364	-0.149831224287494	0.261523916948583	0.998625307316004	152.879890009364	0.245432708330104
ENSG00000117676.9	RPS6KA1	chr1	26856252	26901521	+	45269	4296	220	157	159.111111111111	FALSE	156.655729570929	0.100910585157066	0.511116741719672	0.74541003888413	156.655729570929	0.00269653963569431	0.986170241322325	0.992742405936057	156.655729570929	0.132518589899925	0.39091778218125	0.537640521972232	156.655729570929	-0.382154683787743	0.0156181936485188	0.0440721717245914	156.655729570929	0.22407442215833	0.145257114147399	0.426295780458056	156.655729570929	0.136194491743825	0.379459521663381	0.590645175412049	156.655729570929	0.00961196189317396	0.950733122599116	0.97172872580791	156.655729570929	-0.363134990065998	0.0243511648793198	0.0662670325982981	156.655729570929	0.123163837001264	0.417486865873407	0.998625307316004	156.655729570929	0.13349795210813
ENSG00000117713.13	ARID1A	chr1	27022524	27108595	+	86071	4659	252	166	172.555555555556	TRUE	170.004505721558	-0.107048716043034	0.600889777314647	0.799207687654237	170.004505721558	-0.0212219293265029	0.917506767286133	0.96207615787167	170.004505721558	-0.025841295779785	0.899672720310645	0.93758771714089	170.004505721558	-0.551926333776952	0.00785334276439153	0.0251024474116486	170.004505721558	0.0062807015364501	0.97554657982865	0.989874830660025	170.004505721558	-0.0804279924348592	0.695837049257713	0.829404160926095	170.004505721558	0.0128080362462711	0.950118493835358	0.971659907494648	170.004505721558	-0.541458928013691	0.00994247895358172	0.0325472498641402	170.004505721558	0.113329417579484	0.580142436508799	0.998625307316004	170.004505721558	-0.0592060631083562
ENSG00000060642.6	PIGV	chr1	27113963	27124889	+	10926	576	37	20	21.3333333333333	FALSE	20.9942110742363	-0.462449338081158	0.188860015090482	0.4645834753062	20.9942110742363	-0.621307505247141	0.0881464079166425	0.268276317149412	20.9942110742363	-0.238875531005302	0.49253501979875	0.633381503029189	20.9942110742363	0.509579388373061	0.110713013107343	0.206723226407196	20.9942110742363	0.248358920263201	0.453815134847224	0.733466949482072	20.9942110742363	-0.216776951171923	0.535092279397596	0.716088854627566	20.9942110742363	0.0921703656697296	0.783412445751939	0.868005360717173	20.9942110742363	0.770621661819273	0.0160146138465603	0.0476511634555658	20.9942110742363	0.710808258344359	0.0397196517205437	NA	20.9942110742363	0.404530554075218
ENSG00000204160.7	ZDHHC18	chr1	27153201	27184093	+	30892	3180	183	122	117.777777777778	FALSE	115.358585795708	-0.0779742560364416	0.614838924581787	0.808745473121879	115.358585795708	0.207461540597893	0.174706745129133	0.401385404959103	115.358585795708	0.120500527616351	0.434252855795614	0.580266297233057	115.358585795708	-0.108569081064196	0.483676680407482	0.619747798428391	115.358585795708	-0.0460479424401131	0.768786145188288	0.91170875298854	115.358585795708	0.00222295679363541	0.988662914029433	0.994144919550248	115.358585795708	0.261705690343058	0.0857221820013133	0.183694967380408	115.358585795708	-0.242280634540913	0.132850358762461	0.244686227967633	115.358585795708	0.0319263135963285	0.838093995625894	0.998625307316004	115.358585795708	-0.205238583804258
ENSG00000142751.10	GPN2	chr1	27202624	27216788	-	14164	1836	101	66	68	FALSE	66.7763795204842	-0.167741147830106	0.382063327183632	0.653690702199905	66.7763795204842	-0.326154175689387	0.098463975014104	0.285558381845734	66.7763795204842	0.0929342264868914	0.623969041220279	0.739969157918511	66.7763795204842	0.00194964728073805	0.991744373734844	0.994352953113478	66.7763795204842	-0.217316594935881	0.267488478426075	0.578181128507445	66.7763795204842	0.0303067612843438	0.874398478230959	0.935569521680951	66.7763795204842	0.113183179694671	0.549288202656095	0.689792957716515	66.7763795204842	0.0756571645400161	0.693684116143874	0.797629018640588	66.7763795204842	-0.0495754471057752	0.801366287406257	0.998625307316004	66.7763795204842	0.356460936973731
ENSG00000198746.8	GPATCH3	chr1	27216979	27226957	-	9978	2471	142	86	91.5185185185185	FALSE	89.7643676204497	-0.378733265250974	0.10011482466855	0.327668630572645	89.7643676204497	-0.00138413301373247	0.995140003775626	0.997159909060691	89.7643676204497	0.123139213460168	0.585848645351917	0.711084696434522	89.7643676204497	0.208758494537513	0.350553028564099	0.490321771103508	89.7643676204497	-0.036583613606074	0.87252761444071	0.954837485458146	89.7643676204497	-0.266261783863695	0.249860006093128	0.454132954416759	89.7643676204497	-0.446987288271383	0.0551512964118385	0.131935146386429	89.7643676204497	0.0462108172584134	0.839512823040065	0.900737858673511	89.7643676204497	0.3421496516449	0.138980065032034	0.975431061423351	89.7643676204497	-0.264877650849963
ENSG00000090273.9	NUDC	chr1	27226729	27273353	+	46624	12287	638	465	455.074074074074	FALSE	445.699734972989	-0.188934437182164	0.0758347731426621	0.286042511319053	445.699734972989	-0.36144241057731	0.000801743158215001	0.010977333904312	445.699734972989	-0.371765027447594	0.000571904292390635	0.0030831593851243	445.699734972989	-0.475752259746459	9.86043528075976e-06	7.79535835452235e-05	445.699734972989	-0.252878307254571	0.0185799542783409	0.1397980302433	445.699734972989	-0.232619238611122	0.0304916789615522	0.114372756121719	445.699734972989	-0.358484096556988	0.000887744702405761	0.00483957019974085	445.699734972989	-0.506111137737988	3.71006248683696e-06	4.05007558452497e-05	445.699734972989	-0.0639438700724073	0.552894584137537	0.998625307316004	445.699734972989	0.128823171966188
ENSG00000090020.6	SLC9A1	chr1	27425306	27493472	-	68166	1015	62	37	37.5925925925926	FALSE	37.1390785716444	-0.0629131870999058	0.841561959920782	0.927461190109894	37.1390785716444	-0.560193335362778	0.0889129817509824	0.269836323715584	37.1390785716444	0.0114870040469807	0.970991651386231	0.983173443336532	37.1390785716444	-0.300321483299142	0.346632954871183	0.486293090777602	37.1390785716444	-0.0739904357188121	0.816097407834422	0.932150267648122	37.1390785716444	0.254990748684756	0.414296106197426	0.618936650919693	37.1390785716444	0.190757985642566	0.541433536317039	0.682824070921545	37.1390785716444	0.251110222639081	0.423230819035134	0.571728345689602	37.1390785716444	-0.0110772486189063	0.972144504782455	NA	37.1390785716444	0.815184084047534
ENSG00000142784.11	WDTC1	chr1	27561007	27635110	+	74103	1460	89	50	54.0740740740741	FALSE	52.7435476642659	-0.220720646607031	0.329941373437923	0.609986230393996	52.7435476642659	-0.0969339340512217	0.668603077670747	0.832596268737829	52.7435476642659	-0.399990390974753	0.0854962514506672	0.173293724997862	52.7435476642659	-0.209774561211092	0.353070680153543	0.492370694263087	52.7435476642659	-0.4103479331864	0.0786337526546778	0.309462025674697	52.7435476642659	-0.422031566547577	0.0717051111354225	0.202469532109744	52.7435476642659	-0.294300600480624	0.201125807462502	0.344400828529133	52.7435476642659	-0.523672664241645	0.0279371176767289	0.0735771273489664	52.7435476642659	-0.189627286579369	0.420030953178309	NA	52.7435476642659	-0.325097632496355
ENSG00000186501.10	TMEM222	chr1	27648651	27662891	+	14240	870	76	29	32.2222222222222	FALSE	31.0878734851055	-0.614691391285694	0.0392388450179156	0.205390193753012	31.0878734851055	-0.465762826347247	0.117329639757469	0.315961958682052	31.0878734851055	-0.57754572639484	0.0546182313140771	0.122969346269366	31.0878734851055	-0.669386297678857	0.0250840255013069	0.0645303986934538	31.0878734851055	-0.965747862568823	0.00199453589211053	0.0355892488700686	31.0878734851055	-0.654977100402282	0.0312540862819112	0.115959837453471	31.0878734851055	-0.75191771782035	0.0136614156322007	0.0444508748838284	31.0878734851055	-0.714178022093205	0.0202614839425162	0.0574851680438054	31.0878734851055	-0.351056471283129	0.275748441560477	NA	31.0878734851055	-0.189214274055035
ENSG00000142733.10	MAP3K6	chr1	27681675	27693383	-	11708	1065	71	40	39.4444444444444	FALSE	38.9142881811751	0.0771254073189514	0.754359280614669	0.887776161797897	38.9142881811751	-0.179879315286479	0.481861974592526	0.70938129659198	38.9142881811751	0.613297531827598	0.0101012835523249	0.0320114142817257	38.9142881811751	-0.40948728552119	0.113022600087496	0.209932864627403	38.9142881811751	0.0909954314102924	0.7156632118775	0.889020017548312	38.9142881811751	0.101321360128703	0.685709726396781	0.822962807774418	38.9142881811751	0.314349341902119	0.197493288675591	0.340717122741659	38.9142881811751	-0.485827919864564	0.0720373733738053	0.153427377075886	38.9142881811751	0.013870024091341	0.9549274168578	NA	38.9142881811751	0.281200675415182
ENSG00000158195.6	WASF2	chr1	27730730	27816669	-	85939	29356	1725	1069	1087.25925925926	FALSE	1070.88127507163	0.067789075952586	0.624695958995699	0.816330631122909	1070.88127507163	0.324421374941711	0.0190479055179448	0.101535505958283	1070.88127507163	0.760191228763064	3.45437904860986e-08	5.69491878032415e-07	1070.88127507163	0.00089147648486311	0.994869298992654	0.996663877209552	1070.88127507163	0.0399279976419996	0.77375145560587	0.913875314717189	1070.88127507163	0.392691814901242	0.00453732277782569	0.0313029382894442	1070.88127507163	0.473996086875776	0.000602267304509792	0.00350370559750297	1070.88127507163	-0.265148847351529	0.0578133267907738	0.129207550770326	1070.88127507163	-0.0278610783105864	0.840655590688053	0.998625307316004	1070.88127507163	0.0682704399595312
ENSG00000126705.9	AHDC1	chr1	27860546	27930942	-	70396	4372	325	154	161.925925925926	FALSE	159.380155058765	0.381062063362444	0.162663127632244	0.432407560134533	159.380155058765	1.05787401920439	9.14299352855704e-05	0.00210671323526849	159.380155058765	0.671382300723835	0.0136135166130873	0.0407305416242067	159.380155058765	0.0690602729518343	0.801479717731021	0.870336314143262	159.380155058765	0.98372468151068	0.000280377238408627	0.00973215679882446	159.380155058765	0.487471923568351	0.0746173506882576	0.208048251715048	159.380155058765	0.669594578349681	0.0138777714910468	0.0450065246238838	159.380155058765	-0.238934187819747	0.392632972750157	0.541928641792155	159.380155058765	0.602662618148236	0.0242547765302769	0.741168121729367	159.380155058765	-0.570402095636041
ENSG00000126709.10	IFI6	chr1	27992572	27998729	-	6157	415920	24493	15341	15404.4444444444	FALSE	15110.7136728237	0.163905587886656	0.220653584839353	0.502879649880096	15110.7136728237	-0.617586870628844	4.00423622023876e-06	0.000182048221657557	15110.7136728237	-1.16015844511972	4.91546112542725e-18	4.15988452957587e-16	15110.7136728237	0.301518075454442	0.0242380179679006	0.0628660325927508	15110.7136728237	0.0357738911156504	0.789262610253945	0.920617318097382	15110.7136728237	-0.348503143941683	0.00924978435035628	0.051403116783781	15110.7136728237	-1.25154157214004	1.00641225567274e-20	1.35499686422847e-18	15110.7136728237	0.338411519071236	0.0114496973005233	0.0365715349433681	15110.7136728237	-0.128131696771006	0.338332336815807	0.998625307316004	15110.7136728237	0.269083726687161
ENSG00000009780.11	FAM76A	chr1	28052490	28089633	+	37143	1315	75	49	48.7037037037037	FALSE	47.7358305869287	-0.306376475580931	0.160945245033939	0.431328638528885	47.7358305869287	-0.0795521708594955	0.712933870804086	0.857489222518287	47.7358305869287	-0.355863493087811	0.109920838807847	0.210371865958762	47.7358305869287	-0.0949821184041271	0.656855018613036	0.763780907536696	47.7358305869287	-0.329249947091016	0.139030661945608	0.417441087259963	47.7358305869287	-0.39595810688757	0.078425489514316	0.214229603388937	47.7358305869287	-0.653580902999143	0.00446239927430466	0.0183833472190409	47.7358305869287	-0.472926720519321	0.0386681104690607	0.0947613981323975	47.7358305869287	-0.0228734715100848	0.919527931487873	NA	47.7358305869287	-0.316405936028075
ENSG00000117758.9	STX12	chr1	28099694	28150963	+	51269	3112	166	111	115.259259259259	FALSE	113.135285747963	0.343570876790286	0.0317072504896255	0.18569404827972	113.135285747963	0.47070389582314	0.00322153704036699	0.0293605929648216	113.135285747963	0.590884164609788	0.000193231687722228	0.00120619734278665	113.135285747963	0.717533477483913	3.87613564911471e-06	3.40685869218925e-05	113.135285747963	0.192139890015396	0.24213911326458	0.549029895501163	113.135285747963	0.433596983058056	0.0071681066567084	0.0428639271544487	113.135285747963	0.531300813974829	0.000839601937293512	0.00463110044369345	113.135285747963	0.411777710363964	0.0112565454854041	0.0361682238239706	113.135285747963	-0.151430986774889	0.336370820521148	0.998625307316004	113.135285747963	-0.0371069127650837
ENSG00000117751.13	PPP1R8	chr1	28157289	28178187	+	20898	2727	130	108	101	FALSE	99.134512346922	-0.189921738705753	0.220424260755276	0.502826930854752	99.134512346922	-0.271486447586712	0.0852623584685072	0.26279615586235	99.134512346922	-0.530033510530882	0.00108620918917538	0.00523430306670956	99.134512346922	-0.285153870796377	0.0674104125588748	0.14094327670545	99.134512346922	-0.27300503639825	0.0847855921025383	0.322105502959878	99.134512346922	-0.451941981584152	0.0052366590260968	0.0346743309283876	99.134512346922	-0.430781992528785	0.00720557316285596	0.0268802364085382	99.134512346922	-0.283530434939018	0.0766028013743394	0.16114879095937	99.134512346922	-0.0830832976924963	0.602259818114992	0.998625307316004	99.134512346922	-0.18045553399744
ENSG00000117748.5	RPA2	chr1	28218035	28241257	-	23222	6339	328	231	234.777777777778	FALSE	230.835532293697	0.0378549550933377	0.731649515183154	0.876250878630947	230.835532293697	-0.226650471799962	0.0463337278063514	0.178622645703099	230.835532293697	-0.281268620304188	0.014011180735585	0.0416171559184806	230.835532293697	-0.109241524587279	0.326629969918913	0.465656010380147	230.835532293697	0.0708368892833011	0.524804721240257	0.7819465471434	230.835532293697	-0.152823559068831	0.179141862769037	0.366209846560244	230.835532293697	-0.250191724880882	0.0282551016099596	0.0779251498777469	230.835532293697	0.0248172247114895	0.825658728953796	0.891254065291962	230.835532293697	0.0329819341899634	0.764665540474933	0.998625307316004	230.835532293697	0.0738269127311313
ENSG00000158161.11	EYA3	chr1	28296855	28415207	-	118352	4910	258	189	181.851851851852	FALSE	178.14525130922	0.19434323616233	0.222284323330332	0.50378766649347	178.14525130922	0.414049040222715	0.00900988909253624	0.0611008454178027	178.14525130922	0.183412374316395	0.252745767403907	0.390999110228259	178.14525130922	-0.00171132416955986	0.991496393722598	0.994352953113478	178.14525130922	0.284377869889616	0.0750251984233683	0.304695572755965	178.14525130922	0.109687642053752	0.497020452269019	0.687932046551791	178.14525130922	0.212189572211942	0.185091876909549	0.326399368568814	178.14525130922	-0.145203554731764	0.377801326479069	0.527899520889504	178.14525130922	0.0900346337272857	0.566773146189087	0.998625307316004	178.14525130922	-0.304361398168963
ENSG00000126698.6	DNAJC8	chr1	28525967	28559536	-	33569	11464	630	409	424.592592592593	FALSE	417.275989426316	0.143338898690831	0.445398952257519	0.701716018615343	417.275989426316	0.0712402198938346	0.705409299798486	0.853522200164672	417.275989426316	0.253099453053801	0.177998033982207	0.301217011991218	417.275989426316	0.402487221469883	0.0314541149265528	0.0772418551471047	417.275989426316	0.178017831548083	0.344183364244223	0.64879367303228	417.275989426316	0.204076843945134	0.278282620811786	0.486679663163458	417.275989426316	-0.0286367782827123	0.879455424055483	0.931600841416824	417.275989426316	0.168455822904448	0.371589561594725	0.521140284774421	417.275989426316	0.0346789328572514	0.853184795144409	0.998625307316004	417.275989426316	0.1328366240513
ENSG00000130770.13	ATPIF1	chr1	28562620	28573417	+	10797	19980	1093	733	740	FALSE	727.771236347453	0.222750232499582	0.0731320972228283	0.281564911578012	727.771236347453	-0.278293069346322	0.0271879001960311	0.12652739213532	727.771236347453	0.115680307974237	0.354225835474514	0.499468545545308	727.771236347453	0.0592656786012376	0.634345320671808	0.745804778974555	727.771236347453	-0.139362751443274	0.267324810847008	0.578108607735827	727.771236347453	0.288828319453303	0.0204356087227561	0.0882207036423059	727.771236347453	0.0564578192893992	0.651599679621563	0.772736521168719	727.771236347453	0.0229623578363297	0.854758815236345	0.911482879177986	727.771236347453	-0.362112983942856	0.00372150819791133	0.422264167506476	727.771236347453	0.567121388799625
ENSG00000130766.4	SESN2	chr1	28586038	28609002	+	22964	8586	732	262	318	FALSE	311.180387605861	-0.415436021724181	0.0100457817431358	0.0948637795637672	311.180387605861	0.135854869354718	0.391384429309801	0.633717572676182	311.180387605861	0.592256586968928	0.000150028912484137	0.000973818054298059	311.180387605861	1.29190024994272	3.64917070304894e-17	2.11938110243744e-15	311.180387605861	-0.399909728061323	0.0138628428181951	0.117488031174749	311.180387605861	0.00449546507862945	0.977548825994976	0.987551030899426	311.180387605861	0.266504321700198	0.0912868155774433	0.192586572464663	311.180387605861	1.11006506677623	7.18932593617222e-13	3.19421751344132e-11	311.180387605861	0.0155262936628585	0.924852143655712	0.998625307316004	311.180387605861	-0.131359404276089
ENSG00000130772.9	MED18	chr1	28655513	28662476	+	6963	1354	76	49	50.1481481481481	FALSE	49.4963696482257	0.0828132834468783	0.729806322472647	0.875859094983077	49.4963696482257	-0.0993323241958731	0.685888694580449	0.842707581911953	49.4963696482257	0.165458064621312	0.491770290385199	0.632581181291673	49.4963696482257	-0.0611797297649461	0.800363815767703	0.869814488677429	49.4963696482257	0.145177651199095	0.547705799881522	0.797985327703037	49.4963696482257	0.0970932765322729	0.689573374208498	0.824980423081557	49.4963696482257	-0.06446345732245	0.792445616941375	0.873764952492996	49.4963696482257	-0.0327560630932455	0.894567502072201	0.936292912062848	49.4963696482257	0.0623643677522162	0.793145177637985	NA	49.4963696482257	0.196425600728146
ENSG00000204138.8	PHACTR4	chr1	28696114	28826881	+	130767	8476	491	311	313.925925925926	FALSE	308.135854563063	-0.142601281093345	0.372002937151901	0.644949484776511	308.135854563063	-0.427421309736143	0.00819587096764162	0.0569417587321841	308.135854563063	-0.449967148753927	0.00542565694447931	0.0194955065138064	308.135854563063	-0.346578724634684	0.0308167831214117	0.075939527126141	308.135854563063	-0.321033488248632	0.0465014239003254	0.238268110947431	308.135854563063	-0.127491293541228	0.427010966884309	0.629779162113522	308.135854563063	-0.250715090923484	0.119000549833518	0.235982790854863	308.135854563063	-0.527641291193137	0.0012049495922807	0.00575036631418166	308.135854563063	-0.178432207155287	0.268869298850892	0.998625307316004	308.135854563063	0.299930016194915
ENSG00000180198.11	RCC1	chr1	28832455	28865812	+	33357	9179	471	317	339.962962962963	FALSE	333.972915635225	0.0519903849994539	0.809339205071811	0.91254926783563	333.972915635225	0.0657285035886505	0.760702580935046	0.882474785499847	333.972915635225	-0.601161297234881	0.00590313595724057	0.020940225994427	333.972915635225	-0.452953407967329	0.0368877646477606	0.0880195157518798	333.972915635225	0.320681144052745	0.136141042597178	0.414282637450971	333.972915635225	-0.0614732516753334	0.776378143252419	0.878640389206055	333.972915635225	-0.04890961190218	0.821031306083621	0.892001978953302	333.972915635225	-0.350406743587309	0.107584955252021	0.208505978706533	333.972915635225	0.268690759053291	0.210746672413445	0.998625307316004	333.972915635225	-0.127201755263984
ENSG00000180098.5	TRNAU1AP	chr1	28879597	28905051	+	25454	4719	262	178	174.777777777778	FALSE	171.875537312804	-0.228891643997508	0.145230047854981	0.406544710025117	171.875537312804	0.118071018215967	0.447016545766014	0.68274132445459	171.875537312804	0.283612578212335	0.0657570250945125	0.141306550277562	171.875537312804	-0.456974393796495	0.00406484055061739	0.0145119217086324	171.875537312804	-0.298022305155879	0.0613652315188369	0.272962117263708	171.875537312804	-0.029419687069997	0.851421162625293	0.922613661753064	171.875537312804	0.0628212710626892	0.686737680134526	0.798110257085456	171.875537312804	-0.486175818424508	0.00277675377066868	0.0115192502363034	171.875537312804	-0.069130661158371	0.66627740007221	0.998625307316004	171.875537312804	-0.147490705285964
ENSG00000120656.7	TAF12	chr1	28915835	28969597	-	53762	2287	122	88	84.7037037037037	FALSE	83.3195516574375	0.0623407968949937	0.719047093345287	0.870469283508335	83.3195516574375	0.069464912680463	0.691310622522328	0.845559007809141	83.3195516574375	0.159994267659208	0.357295867330703	0.502208800842203	83.3195516574375	-0.363408393803281	0.0434795230313215	0.100248843190535	83.3195516574375	0.17191585635323	0.323098950251115	0.628969377304984	83.3195516574375	-0.00546081631917408	0.975444742877176	0.986269622418549	83.3195516574375	0.296060037940858	0.0846209593248865	0.182112338232246	83.3195516574375	-0.263820303914835	0.150690627224781	0.268828932647942	83.3195516574375	0.109575059458237	0.522376563718536	0.998625307316004	83.3195516574375	-0.0749257289996371
ENSG00000162419.8	GMEB1	chr1	28995244	29045865	+	50621	3067	172	104	113.592592592593	FALSE	111.566084081293	-0.322896701746971	0.0580101108749041	0.25045513882044	111.566084081293	0.107505910660917	0.518115759119556	0.736872060745259	111.566084081293	0.226324090925348	0.17062187035807	0.291790981524598	111.566084081293	-0.215587517033173	0.200801804234761	0.325013630679434	111.566084081293	-0.148198591786455	0.383526979791047	0.681236225985519	111.566084081293	-0.0338748533424356	0.841121946603771	0.917193473741699	111.566084081293	0.0776308880773674	0.641590292952649	0.764847242175642	111.566084081293	-0.134875445554672	0.430996916131642	0.57835073946629	111.566084081293	0.174698109960516	0.312135657289747	0.998625307316004	111.566084081293	-0.141380764003352
ENSG00000198492.10	YTHDF2	chr1	29063133	29096287	+	33154	4975	274	174	184.259259259259	FALSE	181.002142836925	0.105521012990183	0.497632995588787	0.738718142131968	181.002142836925	-0.2156871937893	0.175849955499585	0.40346054855908	181.002142836925	0.0383423732432955	0.807246559497723	0.877347471587178	181.002142836925	0.163796964900658	0.290530174369295	0.426163625958664	181.002142836925	-0.19590455281341	0.219299155664988	0.523519153183998	181.002142836925	0.0712013977437491	0.650943815569447	0.800482527698604	181.002142836925	0.0938853373416547	0.54902803777265	0.689758680001098	181.002142836925	0.0354322576496315	0.822803073622466	0.889684608446	181.002142836925	-0.301425565803592	0.0561170351782338	0.886180118215023	181.002142836925	0.286888591533049
ENSG00000159023.14	EPB41	chr1	29213603	29446553	+	232950	4551	269	162	168.555555555556	FALSE	164.438449079332	0.531130498861362	0.000294680306867063	0.0105616114249777	164.438449079332	0.771052566828808	1.20600360197193e-07	9.89001919551748e-06	164.438449079332	0.682538612206704	3.20484803451779e-06	3.53767448878573e-05	164.438449079332	0.875094449337386	1.14609540539861e-09	2.04502083782571e-08	164.438449079332	0.654950108289585	8.38247625678806e-06	0.000908374195339252	164.438449079332	0.308178575021344	0.0411951528464542	0.139984752655293	164.438449079332	0.176678486536686	0.24418196574632	0.39558813994928	164.438449079332	0.388617315811099	0.00994438255470861	0.0325472498641402	164.438449079332	0.123819609428223	0.375146999522559	0.998625307316004	164.438449079332	-0.462873991807463
ENSG00000116350.11	SRSF4	chr1	29474255	29508499	-	34244	8036	419	301	297.62962962963	FALSE	292.319962353493	-0.0971899163178572	0.525125768392318	0.753415541766037	292.319962353493	-0.0933332510942413	0.543331724373424	0.75494607875448	292.319962353493	-0.231775512449223	0.133242442217398	0.243019774536904	292.319962353493	-0.149167374774945	0.329773904554813	0.468707580119483	292.319962353493	-0.0544199187132148	0.722962491595378	0.892512886283375	292.319962353493	-0.100503617868206	0.513887052885142	0.700905656475422	292.319962353493	-0.045646450307017	0.765982353026271	0.855412786040425	292.319962353493	-0.294421415644458	0.0582878483020286	0.129876083252715	292.319962353493	0.0427699976046424	0.780444333625236	0.998625307316004	292.319962353493	-0.00717036677396478
ENSG00000116353.11	MECR	chr1	29519385	29557454	-	38069	794	55	29	29.4074074074074	FALSE	28.6267406273072	-0.258162524722303	0.370740926246313	0.644570005194488	28.6267406273072	-1.02559470698458	0.00109447194155457	0.0136930198707851	28.6267406273072	-0.848402792272	0.00595134071135515	0.0210775661861705	28.6267406273072	-1.08131157354645	0.000508726678215286	0.00245016003394094	28.6267406273072	-0.175705752398555	0.54469135767562	0.795680980487515	28.6267406273072	-0.639626551878528	0.0350857207849094	0.125109034869464	28.6267406273072	-0.441381750326003	0.135701733802833	0.260217006165726	28.6267406273072	-0.548290916365033	0.0700788552282185	0.150053182544084	28.6267406273072	0.0824567723237481	0.778513160035954	NA	28.6267406273072	0.385968155106057
ENSG00000162511.7	LAPTM5	chr1	31205316	31230667	-	25351	421	46	12	15.5925925925926	FALSE	15.52836347276	-0.297108529230812	0.525071819580269	0.753415541766037	15.52836347276	0.0935673226139988	0.836060983689363	0.923477868571717	15.52836347276	0.13271201818326	0.768678953317689	0.848928806758761	15.52836347276	1.18429379552652	0.00373804303752762	0.0135190274446359	15.52836347276	0.43064777462311	0.326246325170766	0.631020979851303	15.52836347276	0.247845460382042	0.58044105718381	0.751646638609055	15.52836347276	0.48913121733827	0.260427694744854	0.411187010572632	15.52836347276	2.05198648272063	2.3241333266034e-07	3.4192464801652e-06	15.52836347276	0.727756303853923	0.105658016325263	NA	15.52836347276	0.154278137768043
ENSG00000162512.11	SDC3	chr1	31342314	31381608	-	39294	744	47	27	27.5555555555556	FALSE	26.9561677843713	0.628346546110409	0.0522763227123561	0.237222926712234	26.9561677843713	0.407547736975165	0.218465696889925	0.457203528630211	26.9561677843713	0.404796875209404	0.222200279762225	0.354699942616458	26.9561677843713	0.762930061706593	0.0173639951776264	0.0480638623096187	26.9561677843713	0.379623649753532	0.254028778192265	0.564042909299466	26.9561677843713	0.247053569274442	0.463868720709162	0.660990611324826	26.9561677843713	-0.396697840460063	0.265666177005665	0.417233942890128	26.9561677843713	-0.439190069784526	0.227485017199164	0.364701269623293	26.9561677843713	-0.248722896356877	0.428059549184234	NA	26.9561677843713	-0.160494167700723
ENSG00000134644.11	PUM1	chr1	31404353	31538838	-	134485	9890	496	360	366.296296296296	FALSE	358.617141595342	-0.0799456536264229	0.490182627731337	0.732060979835405	358.617141595342	0.194536322423734	0.0908226635123249	0.272744233852828	358.617141595342	0.0603641541774232	0.602231797136239	0.723166452615219	358.617141595342	0.200538474671976	0.0792332974091327	0.159688609838411	358.617141595342	-0.0545807192419155	0.639815896972729	0.848643517444407	358.617141595342	-0.10470254556271	0.371610040204582	0.583208551264202	358.617141595342	0.000319601197112749	0.997804625900641	0.998591272187532	358.617141595342	0.0735473445072978	0.527656615267461	0.664983888382199	358.617141595342	0.0253649343845074	0.827586034364421	0.998625307316004	358.617141595342	-0.299238867986444
ENSG00000060688.8	SNRNP40	chr1	31732417	31769662	-	37245	789	62	26	29.2222222222222	FALSE	28.3883625362541	-0.186893962913194	0.504439026427899	0.741997844943084	28.3883625362541	-0.0574777735093688	0.837176259153469	0.924117793644438	28.3883625362541	-1.07058243830093	0.00059808060772812	0.00319575723407822	28.3883625362541	-0.938129526243632	0.00181499097120388	0.00733424728063558	28.3883625362541	-0.0865791097711436	0.758217021731947	0.907871948545525	28.3883625362541	-0.850713101311733	0.0053489597290706	0.0351910928869251	28.3883625362541	-0.600611286662776	0.0412927657707589	0.105064041419372	28.3883625362541	-0.737284259969353	0.0151793734758701	0.0457388649394989	28.3883625362541	0.10031485314205	0.722981950088501	NA	28.3883625362541	-0.793235327802364
ENSG00000121766.10	ZCCHC17	chr1	31769842	31837783	+	67941	3485	208	122	129.074074074074	FALSE	126.148313324268	0.318586452231367	0.0598655588430818	0.255086965151127	126.148313324268	-0.483382018934588	0.0074105360941901	0.052829546056119	126.148313324268	0.194911442996211	0.256613664262851	0.395330967517284	126.148313324268	0.312652378486585	0.064477466031655	0.135928164019163	126.148313324268	-0.0656974244410721	0.707524456202325	0.885377033912669	126.148313324268	0.322591479608622	0.0593643845906721	0.178355736982854	126.148313324268	0.231482792408718	0.1767910131347	0.315962377859	126.148313324268	0.179082050244193	0.301508131853235	0.447976896129499	126.148313324268	-0.384283876672439	0.0243737814321917	0.741168121729367	126.148313324268	0.805973498543209
ENSG00000168528.7	SERINC2	chr1	31882412	31907525	+	25113	4348	288	149	161.037037037037	FALSE	159.28051346149	-0.591186639910974	0.00944318348834136	0.0917072442375971	159.28051346149	-0.364456999899992	0.108275200622862	0.301987894769226	159.28051346149	-0.185562875455279	0.410852921429766	0.556445520473235	159.28051346149	-0.430446199427496	0.0570994558394666	0.123860569959361	159.28051346149	-0.209431476596565	0.35401738691503	0.65606623443624	159.28051346149	0.083982963150591	0.708005056683043	0.836390977623707	159.28051346149	0.381182802390943	0.0863715316298418	0.184805545403991	159.28051346149	0.181498634749324	0.417789215510768	0.566530591946999	159.28051346149	0.381755163314409	0.0961647260818914	0.950870257346934	159.28051346149	0.448439963050583
ENSG00000142910.11	TINAGL1	chr1	32042116	32053288	+	11172	7539	536	274	279.222222222222	FALSE	272.503408725818	-0.218900815198855	0.0771104494662214	0.287779695067973	272.503408725818	-0.530886961730324	2.80035492253035e-05	0.000829465128053491	272.503408725818	-1.3238877527021	8.47674085712615e-23	1.09165680081772e-20	272.503408725818	0.328198268451876	0.00670303128321641	0.0221095530744844	272.503408725818	-0.162324400309508	0.192026836861094	0.494091624781049	272.503408725818	-0.539213864267159	2.29117423732374e-05	0.000544368296065742	272.503408725818	-1.32152989922916	9.06795920219824e-23	1.54957472059103e-20	272.503408725818	-0.544719946623492	2.05214668999503e-05	0.000181808329883309	272.503408725818	0.0565764148893469	0.650888931959897	0.998625307316004	272.503408725818	-0.00832690253683491
ENSG00000162517.8	PEF1	chr1	32095463	32110497	-	15034	4685	273	170	173.518518518519	FALSE	170.636837639966	0.0472172279124275	0.770149762559615	0.894932756650286	170.636837639966	0.25636189211785	0.111093967658649	0.306816334320837	170.636837639966	0.400094659176397	0.0123371734840658	0.0377853877597954	170.636837639966	-0.136494203189045	0.402311223116781	0.543221019391539	170.636837639966	0.0768070241921966	0.636870438619307	0.847183419835413	170.636837639966	0.27626176789371	0.0867486113128369	0.229487395095525	170.636837639966	0.3010006793247	0.0609264011850225	0.14157740610097	170.636837639966	-0.303982379184274	0.0700022100530692	0.149961340051006	170.636837639966	0.029589796279769	0.854458135564204	0.998625307316004	170.636837639966	0.0198998757758602
ENSG00000134668.8	SPOCD1	chr1	32256023	32281652	-	25629	1662	98	63	61.5555555555556	FALSE	60.5111928817692	-0.576704183376107	0.00880800224686299	0.0881584204843109	60.5111928817692	-0.0524480718433777	0.80501552893349	0.905890879866809	60.5111928817692	0.129465370053347	0.537205090512297	0.670704812426507	60.5111928817692	-0.413471535871066	0.0559622761219112	0.121822828422171	60.5111928817692	-0.285899741607877	0.188453241882966	0.490221167263477	60.5111928817692	0.0121183403781043	0.954543607474876	0.976448288054069	60.5111928817692	0.0799407309420711	0.704049939100835	0.811094179362364	60.5111928817692	-1.18268822752034	1.24639244028134e-06	1.51097451900955e-05	60.5111928817692	0.29080444176823	0.197900145719142	0.998625307316004	60.5111928817692	0.0645664122214821
ENSG00000184007.13	PTP4A2	chr1	32372022	32410457	-	38435	44746	2483	1625	1657.25925925926	FALSE	1628.55021147182	0.00348931270660379	0.968198936055115	0.987080630189135	1628.55021147182	0.0839375138824409	0.338019847652404	0.586006089365858	1628.55021147182	0.323299673123961	0.000209958662691222	0.00130104091818284	1628.55021147182	0.340349397602244	9.08272823829484e-05	0.000552802213188274	1628.55021147182	-0.0967202367866211	0.271771166766069	0.581559338210328	1628.55021147182	0.164014837563174	0.0611059491980805	0.182130596906916	1628.55021147182	0.285819161428593	0.00105854110847033	0.00559226890004006	1628.55021147182	0.380540555462234	1.31115641434934e-05	0.000123159998920806	1628.55021147182	-0.100209549493225	0.253724754600157	0.998625307316004	1628.55021147182	0.0800773236807331
ENSG00000121774.13	KHDRBS1	chr1	32479430	32526451	+	47021	13802	908	495	511.185185185185	FALSE	499.141820776817	-0.195693453239222	0.100695362380083	0.328118441550942	499.141820776817	-0.306905572461213	0.0105969767887567	0.0684336742332063	499.141820776817	-0.456074350905455	0.000158413250482383	0.00102078328048329	499.141820776817	-0.495406951975692	3.77492419343054e-05	0.000260232555336104	499.141820776817	-0.291888945437748	0.0151160161761132	0.123943598185371	499.141820776817	-0.32484482726803	0.0069866026497835	0.0422333000993035	499.141820776817	-0.425744211148403	0.00041571707977705	0.00258138987333443	499.141820776817	-0.540948356734842	8.7750348217031e-06	8.58798889543098e-05	499.141820776817	-0.0961954921985254	0.424353256489105	0.998625307316004	499.141820776817	-0.0179392548068178
ENSG00000121775.13	TMEM39B	chr1	32537632	32568467	+	30835	7490	361	278	277.407407407407	FALSE	272.030735162256	0.131595068372225	0.250044152698106	0.531920324761019	272.030735162256	-0.0220373991209657	0.849797854622842	0.931981004775286	272.030735162256	-0.119017590452208	0.310103039663438	0.454103123986458	272.030735162256	0.0562005759144144	0.624227294662309	0.737461384915062	272.030735162256	0.17218659029906	0.134963051075554	0.412691559482924	272.030735162256	0.0339591452841088	0.770647356516588	0.8740232814303	272.030735162256	0.0355612538495847	0.759139484248061	0.850348893848402	272.030735162256	-0.0313362381774914	0.789773690464421	0.865449378895899	272.030735162256	0.0405915219268353	0.720523386572049	0.998625307316004	272.030735162256	0.0559965444050746
ENSG00000025800.9	KPNA6	chr1	32573639	32642169	+	68530	13939	907	469	516.259259259259	FALSE	505.564827448403	-0.578902556822629	0.000257163605440276	0.0101029658836271	505.564827448403	-0.261420438776253	0.0976462402709615	0.284565531242728	505.564827448403	-0.227534100392177	0.149185358421265	0.264603012960352	505.564827448403	-0.489330479517459	0.00195804557602441	0.00779883146057951	505.564827448403	-0.461457592099342	0.00359959015183548	0.0517572137365859	505.564827448403	-0.625600999738504	8.51618574266748e-05	0.00156321108296356	505.564827448403	-0.385340758149046	0.0148706911740075	0.0475840697775406	505.564827448403	-0.436445590915071	0.00597227413111614	0.0216081546942581	505.564827448403	0.117444964723287	0.462271705365706	0.998625307316004	505.564827448403	-0.364180560962252
ENSG00000084652.11	TXLNA	chr1	32645287	32663886	+	18599	6011	330	215	222.62962962963	FALSE	218.811404682502	0.00143533194753653	0.991692266649931	0.996725947854535	218.811404682502	0.0773913607586486	0.575471263600927	0.776873286468004	218.811404682502	0.225887616580626	0.0996355384257646	0.194841856173271	218.811404682502	-0.101271447652457	0.4644131595555	0.601669580284954	218.811404682502	0.17943795161692	0.192470069039118	0.494303188867514	218.811404682502	0.0572323357825364	0.680325140087327	0.819933432092227	218.811404682502	0.0747494248675276	0.588796376013212	0.721960065855306	218.811404682502	-0.179240178350459	0.205547412505107	0.338930099743994	218.811404682502	0.178002619669383	0.193215012931148	0.998625307316004	218.811404682502	-0.0201590249761122
ENSG00000160050.10	CCDC28B	chr1	32665987	32670988	+	5001	1886	141	65	69.8518518518518	FALSE	67.6783612685876	-0.354117188881274	0.124894129626194	0.371521575263179	67.6783612685876	-0.216820086970381	0.346921776966269	0.59558479716427	67.6783612685876	0.0402600159865558	0.859366624179334	0.912236509671194	67.6783612685876	-0.162035422986042	0.476800861348866	0.612970551786173	67.6783612685876	-0.391058149918629	0.0943447332662831	0.342585555251305	67.6783612685876	-0.771076399608767	0.00141324517845091	0.0132807295522472	67.6783612685876	-0.284399155609979	0.219503859115682	0.365332701274013	67.6783612685876	-0.66819714280968	0.00551031932615997	0.0202082944829787	67.6783612685876	-0.0369409610373555	0.876130104251222	0.998625307316004	67.6783612685876	-0.554256312638386
ENSG00000160055.15	TMEM234	chr1	32680073	32687972	-	7899	763	44	28	28.2592592592593	FALSE	27.8272073691331	0.210953667523927	0.485692820320343	0.728539230480515	27.8272073691331	0.267708464931234	0.378860200589507	0.623435507858955	27.8272073691331	0.565795604455537	0.0563112448353522	0.12600899561998	27.8272073691331	0.679238889648682	0.01917692872568	0.052096052783978	27.8272073691331	-0.13850196571097	0.664972479017012	0.861487891608859	27.8272073691331	0.386687391319418	0.201807041859784	0.395977540293158	27.8272073691331	0.400156648081892	0.182941260108751	0.323956962400631	27.8272073691331	0.80383851642327	0.00617877011176817	0.0221328650755396	27.8272073691331	-0.349455633234897	0.259325800658414	NA	27.8272073691331	0.118978926388184
ENSG00000084623.7	EIF3I	chr1	32687529	32697205	+	9676	12834	780	453	475.333333333333	FALSE	465.745898106834	-0.154200926101886	0.254686410488095	0.536544201895972	465.745898106834	-0.432953846821603	0.00155635210585361	0.0177532025835882	465.745898106834	-0.202288941305394	0.136859320757654	0.24834223488922	465.745898106834	-0.506175597702786	0.000208914777001002	0.00114381805818294	465.745898106834	-0.58087083656882	2.42869268395369e-05	0.00185888788704972	465.745898106834	-0.30688976543241	0.0246580711822048	0.0991904121888057	465.745898106834	-0.303112264402839	0.0262303406193108	0.073435036781095	465.745898106834	-0.409163276859668	0.00287562716722166	0.0118768073293304	465.745898106834	-0.426669910466934	0.00194934576612896	0.331925780517239	465.745898106834	0.126064081389193
ENSG00000116478.7	HDAC1	chr1	32757687	32799236	+	41549	18430	997	708	682.592592592593	FALSE	667.571313880665	0.000287317613454879	0.997715986127804	0.999027402365989	667.571313880665	0.261306787142148	0.0089438740216102	0.0607609056238748	667.571313880665	0.0469832585856401	0.640672421146699	0.754341477979273	667.571313880665	-0.135468427082154	0.178665632406939	0.298266561338484	667.571313880665	0.00389293997716879	0.96921864510592	0.987717824649869	667.571313880665	-0.170963541063039	0.0927298978934766	0.239673610436717	667.571313880665	0.00861042401824769	0.931924893197028	0.961371874308962	667.571313880665	-0.319733832231612	0.00183341723606194	0.00818897753724748	667.571313880665	0.00360562236371391	0.971383550812994	0.998726332951763	667.571313880665	-0.432270328205187
ENSG00000175130.6	MARCKSL1	chr1	32799433	32801980	-	2547	3814	219	160	141.259259259259	FALSE	137.70790780693	0.0750373423477419	0.699980831985121	0.861562223739675	137.70790780693	0.279032906224682	0.150744523804242	0.368302402673769	137.70790780693	-0.11400530739758	0.56331119200618	0.692430938188811	137.70790780693	0.123202867586138	0.525813352314882	0.656601665074485	137.70790780693	-0.0724637549462936	0.713126887586416	0.888010863662121	137.70790780693	-0.675654472418655	0.000920809664488204	0.00952539543497343	137.70790780693	-0.278152273169382	0.161685652673842	0.296295877430348	137.70790780693	-1.04512247265173	6.7200308808994e-07	8.75574698059707e-06	137.70790780693	-0.147501097294036	0.451026822178904	0.998625307316004	137.70790780693	-0.954687378643337
ENSG00000160058.14	BSDC1	chr1	32830704	32860332	-	29628	5415	293	205	200.555555555556	FALSE	196.645684808814	0.159239668903445	0.659566330410923	0.837210852577552	196.645684808814	0.190986061020848	0.59759158662274	0.792330474295683	196.645684808814	-0.609780483216312	0.0951003883490921	0.188325329424293	196.645684808814	0.414960418632671	0.249954597297598	0.38294768130801	196.645684808814	0.410919699769883	0.255266152818115	0.565195203807601	196.645684808814	-0.203537228453016	0.575600556379313	0.747996175747246	196.645684808814	0.231395041531919	0.522349815928245	0.667734694142736	196.645684808814	0.455964465203768	0.207011468615221	0.340964580188109	196.645684808814	0.251680030866438	0.484815611156662	0.998625307316004	196.645684808814	-0.394523289473864
ENSG00000160062.10	ZBTB8A	chr1	33005028	33071540	+	66512	1131	75	43	41.8888888888889	FALSE	41.2818676202353	-0.0339996382176749	0.909772575911597	0.95682981955118	41.2818676202353	-0.0505796599912338	0.867310869794515	0.938418878924047	41.2818676202353	0.440674403054782	0.134053835974593	0.244098849686523	41.2818676202353	-0.163519350237974	0.588245599803272	0.709247001336753	41.2818676202353	0.0231856445407239	0.938795393060336	0.97953800504559	41.2818676202353	-0.00186247561490141	0.995099016629557	0.997456273183333	41.2818676202353	0.319679837190246	0.280128739540052	0.431494163726744	41.2818676202353	0.0726922399221133	0.810378049884238	0.880444105576845	41.2818676202353	0.0571852827583988	0.849062735688298	NA	41.2818676202353	0.0487171843763324
ENSG00000176261.11	ZBTB8OS	chr1	33065773	33116504	-	50731	2894	176	103	107.185185185185	FALSE	105.078955231213	0.493029711626321	0.0211323916969938	0.145932870574555	105.078955231213	0.175553663372144	0.420737599051283	0.659378184333281	105.078955231213	0.12859303620851	0.556504001656555	0.686086454096665	105.078955231213	0.435680904216808	0.0418409787901879	0.0972786335765592	105.078955231213	0.00563905365377712	0.979588882996103	0.991219904460815	105.078955231213	0.339518050162299	0.117725823056847	0.277925521701155	105.078955231213	-0.0104680122654299	0.962099428073619	0.977849268749079	105.078955231213	0.509871831809085	0.0182184112361707	0.0528185325431036	105.078955231213	-0.487390657972544	0.0229702756216116	0.741168121729367	105.078955231213	0.163964386790154
ENSG00000162521.14	RBBP4	chr1	33116743	33151812	+	35069	6343	419	232	234.925925925926	FALSE	230.400586897845	-0.293281330806736	0.0600012131588901	0.255227754968836	230.400586897845	-0.190369827028885	0.222561053158611	0.462654243248091	230.400586897845	-0.317278206035081	0.043222580683418	0.102440574848972	230.400586897845	-0.461681782261744	0.00324240766033631	0.0120300770228595	230.400586897845	-0.270842490838847	0.0840775075892615	0.321137690995063	230.400586897845	-0.415790811923738	0.00852574782328895	0.0484397667249013	230.400586897845	-0.314956618527446	0.0447540266252159	0.111552392872838	230.400586897845	-0.470839206094484	0.00305792861649003	0.0124474364114202	230.400586897845	0.0224388399678892	0.886935777170833	0.998625307316004	230.400586897845	-0.225420984894853
ENSG00000162520.10	SYNC	chr1	33145507	33169197	-	23690	898	60	34	33.2592592592593	FALSE	32.4709344518522	-0.0715473902193936	0.760862107557057	0.890895193267878	32.4709344518522	-0.224575866204089	0.352410308764698	0.600713217664129	32.4709344518522	-0.144159220922106	0.547944017673828	0.679615912681858	32.4709344518522	-1.36583317785749	8.0461950022923e-07	8.18172928988111e-06	32.4709344518522	-0.207073448402606	0.39253036864929	0.687931345035302	32.4709344518522	-0.186865998229782	0.440986753039385	0.64134341857741	32.4709344518522	-0.91521976654198	0.000515267214450771	0.00305963800533335	32.4709344518522	-1.70962860361971	3.65121515475844e-08	6.59445078560641e-07	32.4709344518522	-0.135526058183213	0.574492784184611	NA	32.4709344518522	0.0377098679743065
ENSG00000162522.6	KIAA1522	chr1	33207486	33240571	+	33085	1538	123	56	56.962962962963	FALSE	55.9979000905648	0.17768343623851	0.700031426446146	0.861562223739675	55.9979000905648	0.451036604583944	0.327074618373286	0.575180102684548	55.9979000905648	-1.03331705289174	0.0301080931133396	0.0762875721143813	55.9979000905648	-0.656295643429297	0.161417909306465	0.276583020072743	55.9979000905648	-0.103370602737121	0.82398026260508	0.935761319599691	55.9979000905648	-0.424443434682158	0.365005910799597	0.577426754735907	55.9979000905648	0.551256428464009	0.230439152005859	0.378499501797424	55.9979000905648	-0.767373634794962	0.105510825400378	0.205292862976755	55.9979000905648	-0.281054038975632	0.543394568713242	0.998625307316004	55.9979000905648	-0.875480039266102
ENSG00000134684.6	YARS	chr1	33240840	33283754	-	42914	7538	401	274	279.185185185185	FALSE	274.138795963419	-0.148908520272889	0.249142380219884	0.531552826419591	274.138795963419	-0.219493679249735	0.0928794518675152	0.276633043588608	274.138795963419	0.27157666904635	0.0330349311599403	0.0821804026559992	274.138795963419	0.366072088447418	0.00368199425527543	0.0133434751029272	274.138795963419	-0.186264982383359	0.153885414198118	0.439984079041575	274.138795963419	-0.0642424883102949	0.621109807783841	0.780508723920738	274.138795963419	-0.248416351723975	0.0577396719710566	0.136456043918832	274.138795963419	0.12467392207312	0.334075042793246	0.482571023142106	274.138795963419	-0.0373564621104704	0.775327270598434	0.998625307316004	274.138795963419	0.15525119093944
ENSG00000116497.13	S100PBP	chr1	33282368	33324476	+	42108	3302	191	123	122.296296296296	FALSE	120.206750462402	0.420347721654339	0.00988312931262115	0.0941280676012342	120.206750462402	0.259743512414095	0.117985463800647	0.316969252698179	120.206750462402	0.261036512865329	0.116553849304813	0.219719982886358	120.206750462402	0.199093363423505	0.22792911781959	0.356643447956484	120.206750462402	0.447413370644366	0.00648292168464941	0.0745242459117654	120.206750462402	0.474216337240556	0.00392936000005577	0.0284798474392297	120.206750462402	0.622294344060657	0.000124048974709784	0.000944558002803034	120.206750462402	0.320204259363982	0.0553862622534382	0.125073018140801	120.206750462402	0.027065648990027	0.863542290802237	0.998625307316004	120.206750462402	0.21447282482646
ENSG00000121900.14	TMEM54	chr1	33360195	33367039	-	6844	737	52	28	27.2962962962963	FALSE	26.7801086825367	-0.389473517968879	0.163623501443176	0.433212222902238	26.7801086825367	-0.44792987526871	0.115143301327073	0.312511721317156	26.7801086825367	-1.12725457836194	0.000264169440917465	0.00158501664550479	26.7801086825367	-0.732454750666912	0.0111601135847005	0.0334690412803403	26.7801086825367	-0.346151340759387	0.220626243045641	0.525167328623008	26.7801086825367	-0.719821493740113	0.0148057590832989	0.0707583859114749	26.7801086825367	-1.01806997322474	0.000803129368631491	0.00445203217071705	26.7801086825367	-0.623882947335254	0.0340137624480572	0.0856950079709205	26.7801086825367	0.0433221772094921	0.880878449865337	NA	26.7801086825367	-0.271891618471402
ENSG00000004455.12	AK2	chr1	33473585	33546597	-	73012	23029	1344	882	852.925925925926	FALSE	833.434991702821	-0.296425711515892	0.00916084549164323	0.0905893957924987	833.434991702821	-0.337108307541913	0.00314828031901132	0.0290203515713014	833.434991702821	-0.638997151561717	2.78640736075279e-08	4.75240226634343e-07	833.434991702821	-0.114623141791237	0.311669692481859	0.449243505970254	833.434991702821	-0.430506984215723	0.000169662552267924	0.00717914971167989	833.434991702821	-0.506905984080882	1.01065161826336e-05	0.00029444755016027	833.434991702821	-0.544605601114061	2.08117106435546e-06	2.77676968136075e-05	833.434991702821	-0.0196353411522956	0.862882209064785	0.917564704574047	833.434991702821	-0.134081272699831	0.243156807758492	0.998625307316004	833.434991702821	-0.169797676538969
ENSG00000134686.12	PHC2	chr1	33789224	33896653	-	107429	3899	233	134	144.407407407407	FALSE	142.098349520639	-0.329931461094784	0.0306234976492837	0.181777154383123	142.098349520639	-0.00167611708368516	0.991085645390276	0.994806493237748	142.098349520639	0.000818052301894935	0.995653245689973	0.997674192738058	142.098349520639	0.446744165303448	0.00196312186942952	0.00781554701243312	142.098349520639	-0.388753360137645	0.0124754410472135	0.111301977053754	142.098349520639	-0.0515658080416038	0.733543325124291	0.851504338541579	142.098349520639	0.0410283258254918	0.783898316322391	0.868056026340123	142.098349520639	0.417982483950621	0.00446921414406171	0.0170663673760775	142.098349520639	-0.0588218990428605	0.710046010849252	0.998625307316004	142.098349520639	-0.0498896909579186
ENSG00000163866.8	SMIM12	chr1	35178338	35325417	-	147079	5767	314	209	213.592592592593	FALSE	209.235029407566	0.011952028001867	0.921871734469513	0.963325309168308	209.235029407566	-0.0666234886016547	0.590075238514329	0.787062228976032	209.235029407566	0.0394721438176913	0.747885560422621	0.833945424760373	209.235029407566	0.218100265179162	0.0690903526180858	0.143708070022488	209.235029407566	-0.0699601481880362	0.572869771523088	0.812163704936386	209.235029407566	0.0890671891524106	0.468549570282985	0.665118099074452	209.235029407566	-0.116002953878006	0.350359735275018	0.507134159904513	209.235029407566	0.0732439969275727	0.553561156876265	0.685758321483687	209.235029407566	-0.0819121761899031	0.50544711302943	0.998625307316004	209.235029407566	0.155690677754065
ENSG00000163867.12	ZMYM6	chr1	35449523	35497569	-	48046	767	48	27	28.4074074074074	FALSE	28.1629311455075	0.851201067160758	0.00466425236797933	0.0622320518646611	28.1629311455075	0.403011426587917	0.202296986698561	0.437217218252786	28.1629311455075	0.584994395183689	0.0600879917663167	0.132360410221986	28.1629311455075	0.382985678380947	0.220305107982739	0.348270981948874	28.1629311455075	0.685366680515563	0.0265413684754123	0.171400145546885	28.1629311455075	0.838757323325704	0.00608119792253926	0.0383385535294727	28.1629311455075	1.0286232574356	0.000594053894845804	0.00346830677371867	28.1629311455075	0.957587979218185	0.00165478158996945	0.00749841367081517	28.1629311455075	-0.165834386645195	0.549437767467862	NA	28.1629311455075	0.435745896737787
ENSG00000116560.6	SFPQ	chr1	35641979	35658749	-	16770	53326	2875	1892	1975.03703703704	TRUE	1940.82342514033	0.244158755223839	0.0528570099985938	0.238260161031978	1940.82342514033	0.144109878593477	0.253956766324527	0.499812051419253	1940.82342514033	0.0842424827306563	0.505068298918396	0.643353914017899	1940.82342514033	0.355301025251969	0.00480307305313968	0.0167294578382898	1940.82342514033	0.274170200752224	0.0298450257568952	0.182352083008341	1940.82342514033	0.255885518991439	0.042722703384529	0.143366292399896	1940.82342514033	-0.017683533746009	0.88883165706866	0.937858410218197	1940.82342514033	0.128397905369553	0.309979155076631	0.457553948839027	1940.82342514033	0.0300114455283848	0.811552629617971	0.998625307316004	1940.82342514033	0.111775640397962
ENSG00000146463.7	ZMYM4	chr1	35734568	35887659	+	153091	3308	165	119	122.518518518519	FALSE	120.54793048181	0.351302025226495	0.0342214431102318	0.194071098911085	120.54793048181	0.124649005683063	0.463055902345641	0.694701122445275	120.54793048181	0.351867033208193	0.035472667230108	0.0873642242258147	120.54793048181	0.374082578704825	0.0237151914782493	0.0618348566536747	120.54793048181	0.258971144394009	0.124685171272434	0.396579945993205	120.54793048181	0.173341826924791	0.308368015340166	0.520349066523493	120.54793048181	0.247498520103853	0.141728064119237	0.269044131118038	120.54793048181	0.384482361906962	0.0223720518509348	0.0620468329423866	120.54793048181	-0.0923308808324855	0.571294636635003	0.998625307316004	120.54793048181	0.0486928212417276
ENSG00000142687.13	KIAA0319L	chr1	35899091	36023551	-	124460	7170	383	273	265.555555555556	FALSE	260.788855960441	-0.0815581569697804	0.600608814765982	0.799207687654237	260.788855960441	0.104889801295719	0.499750182779566	0.722548018903226	260.788855960441	0.380103775709184	0.0135631036652413	0.0406070549761907	260.788855960441	0.0126289866117663	0.935089308340402	0.959254580655453	260.788855960441	-0.00741161476326625	0.962178695116723	0.985922495941789	260.788855960441	0.0157047616984306	0.920008868466246	0.960432190459476	260.788855960441	0.227884591969122	0.14092096645195	0.268027334737163	260.788855960441	0.197927609497726	0.2034312674772	0.336068513096692	260.788855960441	0.0741465422065141	0.634823980145231	0.998625307316004	260.788855960441	-0.0891850395972883
ENSG00000020129.11	NCDN	chr1	36023074	36032875	+	9801	905	55	32	33.5185185185185	FALSE	32.8168151043085	-0.44785682315771	0.0942789502244018	0.317454623605166	32.8168151043085	-0.38207840066827	0.155620340512299	0.375213433969763	32.8168151043085	0.26901300834378	0.285950371826189	0.427770202701602	32.8168151043085	-0.0868873499732169	0.735071568226872	0.823999742054244	32.8168151043085	-0.268934141320216	0.313672393047546	0.620916213994318	32.8168151043085	-0.0259037592590093	0.920880852780903	0.96089094149966	32.8168151043085	0.0385895012475661	0.880746091205037	0.932702868126321	32.8168151043085	-0.283497483114528	0.294675798171293	0.441194463782664	32.8168151043085	0.178922681837494	0.517257779664107	NA	32.8168151043085	0.356174641409261
ENSG00000126067.7	PSMB2	chr1	36067185	36107445	-	40260	20279	1084	722	751.074074074074	FALSE	735.909779288213	0.00855807350106763	0.950279791265052	0.978283650614071	735.909779288213	0.0661121832396001	0.630410691744774	0.811670984961193	735.909779288213	-0.183149056424908	0.184518701553658	0.31018410556296	735.909779288213	-0.0370409574576177	0.78730305352892	0.860787346122068	735.909779288213	0.0406334405610371	0.767631410010688	0.911190583670181	735.909779288213	0.0243032468483975	0.859852531253129	0.926741510188912	735.909779288213	-0.0370178401970338	0.788010040241997	0.870602662885787	735.909779288213	-0.187268308823032	0.175893425308	0.301872992527836	735.909779288213	0.0320753670599695	0.815219444516419	0.998625307316004	735.909779288213	-0.0418089363912026
ENSG00000142686.7	C1orf216	chr1	36179476	36185073	-	5597	1694	88	62	62.7407407407407	FALSE	62.012134173296	-0.303720108031581	0.148362226190708	0.410652588543002	62.012134173296	-0.190010344422259	0.365984940879839	0.611400029673362	62.012134173296	-0.0868209323830467	0.677370941069531	0.783739346659355	62.012134173296	-0.430663073906345	0.0421665497191207	0.0979074891048097	62.012134173296	-0.10693660942477	0.609597233015757	0.831659527360021	62.012134173296	-0.328865686505611	0.124660685623756	0.289225810039869	62.012134173296	-0.493990862549804	0.0222838607247871	0.0648589539470876	62.012134173296	-0.298024194466277	0.165407244092735	0.287690109807799	62.012134173296	0.196783498606811	0.354687772353128	0.998625307316004	62.012134173296	-0.138855342083351
ENSG00000092853.9	CLSPN	chr1	36185819	36235568	-	49749	9248	613	323	342.518518518519	FALSE	336.967825808428	-0.240471086603426	0.0799191982461964	0.292608980476185	336.967825808428	-0.686215035041381	9.55243678463163e-07	5.51188008235303e-05	336.967825808428	-0.996045603325327	2.3325839279233e-12	8.46013909531693e-11	336.967825808428	-1.13124146929775	1.52406110038387e-15	7.24214274759951e-14	336.967825808428	-0.237807563360962	0.0847258655927868	0.32201627102545	336.967825808428	-0.395787986918971	0.00436423231102416	0.0304878681727678	336.967825808428	-0.702055626377872	5.4791516565647e-07	8.49572344262059e-06	336.967825808428	-0.751239822357286	1.03310186322608e-07	1.66608768722812e-06	336.967825808428	0.00266352324246405	0.984648196043279	0.998726332951763	336.967825808428	0.29042704812241
ENSG00000134698.10	AGO4	chr1	36273773	36323491	+	49718	1282	67	46	47.4814814814815	FALSE	46.6921167041974	0.173801872334172	0.455441260273695	0.707711846653317	46.6921167041974	0.291264427226623	0.210846994066521	0.447498652875224	46.6921167041974	0.206288136442866	0.380022080304702	0.525911260798565	46.6921167041974	0.421183353885004	0.0642035209667388	0.135417158155813	46.6921167041974	0.142401783448096	0.547926909220462	0.798045978582695	46.6921167041974	0.086204234360119	0.718483760617641	0.843165173910243	46.6921167041974	0.122941055082639	0.603241406058982	0.734602098273922	46.6921167041974	0.505520619122412	0.0288214176903663	0.0754143455820362	46.6921167041974	-0.031400088886076	0.891656223554018	NA	46.6921167041974	-0.205060192866504
ENSG00000092847.6	AGO1	chr1	36335409	36395211	+	59802	2374	131	87	87.9259259259259	FALSE	86.3778120968892	0.049907597376014	0.775791279401207	0.897829428954614	86.3778120968892	0.00787879391515233	0.964585278354509	0.983954583168065	86.3778120968892	-0.182440131684222	0.312602611756627	0.456497421211075	86.3778120968892	-0.264046992693526	0.141109206881757	0.24893714757818	86.3778120968892	-0.0479854798115915	0.788511853384472	0.920362055585764	86.3778120968892	0.0860759968194718	0.627487020361154	0.784257807247207	86.3778120968892	-0.0619624717150367	0.728601373888586	0.82968979771646	86.3778120968892	-0.268260699121618	0.145636617344995	0.262287592567414	86.3778120968892	-0.0978930771876055	0.579542574264417	0.998625307316004	86.3778120968892	0.0781972029043195
ENSG00000126070.14	AGO3	chr1	36396319	36538101	+	141782	1447	77	54	53.5925925925926	FALSE	52.7968758744494	-0.0164976554733818	0.936865535597071	0.971186838547766	52.7968758744494	-0.0381080234178878	0.85677630240316	0.934698959609399	52.7968758744494	0.124463359155555	0.54972896597237	0.680726253014281	52.7968758744494	0.0488967658147972	0.812747903847064	0.877104429631408	52.7968758744494	-0.143178515087501	0.504719921601024	0.76928665923614	52.7968758744494	0.0179633920375292	0.932349100301239	0.966435357963416	52.7968758744494	0.308842765508303	0.130476452930088	0.252815909449796	52.7968758744494	-0.0288851661303936	0.892753356198122	0.935165191934046	52.7968758744494	-0.126680859614119	0.551535145493204	NA	52.7968758744494	0.0560714154554171
ENSG00000116863.10	ADPRHL2	chr1	36554476	36559533	+	5057	10706	593	394	396.518518518519	FALSE	389.615867225645	0.0124028582756247	0.933205567582282	0.969878909185516	389.615867225645	-0.270366066081094	0.0709480620950225	0.232036981883095	389.615867225645	-0.144317734699638	0.33329507061879	0.478304263165144	389.615867225645	0.219821168746452	0.135289423975543	0.24111147642332	389.615867225645	-0.0690974604929229	0.642675307752278	0.850295451168637	389.615867225645	0.181953260915469	0.219135748428753	0.416789439327461	389.615867225645	-0.255480530768187	0.0878792009662627	0.1871029240203	389.615867225645	-0.104667575806144	0.483939472174501	0.627138128881816	389.615867225645	-0.0815003187685476	0.583006210599186	0.998625307316004	389.615867225645	0.452319326996564
ENSG00000054116.7	TRAPPC3	chr1	36602173	36615098	-	12925	12482	656	453	462.296296296296	FALSE	454.601575436293	0.333068162050645	0.0846626553383699	0.302497931377867	454.601575436293	0.420643735374727	0.0295306331647466	0.133825726108874	454.601575436293	0.574908945088359	0.00287875553188707	0.0117181042860048	454.601575436293	0.621564873829838	0.00123700178228536	0.00527700328247129	454.601575436293	0.320062269714656	0.0983430261668969	0.350330394907353	454.601575436293	0.453648091001302	0.0189706977311849	0.0834936206237291	454.601575436293	0.214173351289789	0.269368186236453	0.421092113008433	454.601575436293	0.466695671474947	0.0158656551015395	0.0473412395004299	454.601575436293	-0.0130058923359889	0.946068681664508	0.998625307316004	454.601575436293	0.0330043556265747
ENSG00000116871.11	MAP7D1	chr1	36621180	36646450	+	25270	10166	588	375	376.518518518519	FALSE	368.335950211007	-0.295493516640164	0.0194975904526841	0.139161115471929	368.335950211007	-0.133125013967278	0.291994941939173	0.541797254974209	368.335950211007	-0.419308322455468	0.00103573423835209	0.00503763759372681	368.335950211007	-0.422369196211026	0.00088017756799952	0.00394614423271632	368.335950211007	-0.443436774081496	0.000535344782280028	0.0149593513689947	368.335950211007	-0.337073798739468	0.00829254845725524	0.0473312972304766	368.335950211007	-0.295038933507402	0.0203252983065599	0.0606482876937849	368.335950211007	-0.493258791990032	0.000130721448430359	0.000889426332888338	368.335950211007	-0.147943257441332	0.250957546311459	0.998625307316004	368.335950211007	-0.20394878477219
ENSG00000054118.9	THRAP3	chr1	36690017	36770958	+	80941	10243	510	378	379.37037037037	TRUE	374.388401677769	-0.173231577346063	0.175935221556172	0.448373851350146	374.388401677769	-0.290451487962751	0.0245946663449315	0.118840785829832	374.388401677769	-0.306277080752983	0.0178980210323439	0.050345620415767	374.388401677769	-0.235997467267709	0.065564838137537	0.137765228585991	374.388401677769	-0.128266341233092	0.318312371134224	0.625502815103652	374.388401677769	0.0510401626619728	0.689737053921627	0.825010561468243	374.388401677769	-0.32541725623011	0.0119499605165613	0.03992005607149	374.388401677769	-0.0268911511426332	0.834253811779879	0.896852717887966	374.388401677769	0.0449652361129702	0.727032738411526	0.998625307316004	374.388401677769	0.341491650624724
ENSG00000142694.6	EVA1B	chr1	36787632	36789755	-	2123	1190	83	39	44.0740740740741	FALSE	43.2905266219714	-0.362543747178715	0.171662725969195	0.444247051467227	43.2905266219714	0.374833536837651	0.139422618268193	0.351707016834996	43.2905266219714	-0.110308191956381	0.674455673076671	0.78158752099104	43.2905266219714	-0.394563134358088	0.137019503958025	0.243414959145647	43.2905266219714	0.150757495796556	0.558940882925025	0.804071342993649	43.2905266219714	-0.39269152660726	0.146630800145388	0.321560041977275	43.2905266219714	-0.168300314477056	0.523243346755534	0.668421561137101	43.2905266219714	-0.403066372414625	0.13911038430488	0.253722264969861	43.2905266219714	0.513301242975271	0.0512495412086177	NA	43.2905266219714	-0.76752506344491
ENSG00000196182.6	STK40	chr1	36805225	36851497	-	46272	3218	165	122	119.185185185185	FALSE	117.094895613493	0.10358090426668	0.519000037077392	0.750501925056095	117.094895613493	0.497112550254051	0.00154554035994496	0.0176525342396798	117.094895613493	0.618897905687215	7.11274011781574e-05	0.000519768163543673	117.094895613493	0.559512718491655	0.000298762028558586	0.001566253324939	117.094895613493	0.0245329027148256	0.881207681155464	0.957968057770571	117.094895613493	0.571826708097256	0.000270338832177793	0.00369006276917338	117.094895613493	0.254101626840686	0.112664570222873	0.226092450542107	117.094895613493	0.594257843179612	0.000161264381630643	0.00105891174814986	117.094895613493	-0.0790480015518539	0.623438573327535	0.998625307316004	117.094895613493	0.0747141578432044
ENSG00000181817.5	10	chr1	36856839	36863493	-	6654	3360	194	123	124.444444444444	FALSE	121.81298223717	0.036807533688244	0.827471123749114	0.920485125717296	121.81298223717	0.350935150180448	0.0356387648032603	0.151742244389924	121.81298223717	0.0167994817857299	0.92152006882695	0.95283073441893	121.81298223717	-0.216930183355001	0.205563102511846	0.330732161673051	121.81298223717	-0.0377989628965994	0.82546939129329	0.935849340789892	121.81298223717	-0.170101392290546	0.326859480920714	0.537666299048772	121.81298223717	-0.169237293186597	0.326961708453207	0.482862180707196	121.81298223717	-0.119127912281382	0.492700260648505	0.634367835696284	121.81298223717	-0.0746064965848433	0.660487084959712	0.998625307316004	121.81298223717	-0.521036542470994
ENSG00000116898.7	MRPS15	chr1	36921319	36930038	-	8719	4216	217	155	156.148148148148	FALSE	153.544360330372	-0.0303722605820793	0.838775548768849	0.92627501506088	153.544360330372	-0.438886508555889	0.00449851206418325	0.0374571758614877	153.544360330372	-0.361976178995944	0.0185726158647293	0.0518004596905162	153.544360330372	-0.222997369163805	0.139017036173173	0.24597877009853	153.544360330372	-0.408213981414293	0.00826202586076341	0.085566855243291	153.544360330372	-0.230731930625808	0.131473347212684	0.298867271254006	153.544360330372	-0.407730644493644	0.00819256344107041	0.0296172167361073	153.544360330372	-0.0859666919717956	0.571987789216043	0.701156503652057	153.544360330372	-0.377841720832214	0.0140827035198655	0.631997533913881	153.544360330372	0.208154577930081
ENSG00000163874.8	ZC3H12A	chr1	37940153	37949980	+	9827	10322	936	296	382.296296296296	FALSE	376.309948113775	0.157009535785452	0.350836763161469	0.627193661160051	376.309948113775	0.0884931722970806	0.601145288908944	0.793726157094335	376.309948113775	-0.151956651734913	0.373461673410168	0.519420946927962	376.309948113775	1.55495902618757	2.4000195039413e-21	2.31810579478504e-19	376.309948113775	0.217668375674035	0.197103037938434	0.499467235725824	376.309948113775	0.495625016090767	0.00310982259040345	0.0240701564520226	376.309948113775	0.0622950128320798	0.713190804286053	0.818364344897452	376.309948113775	1.63201102611019	3.02229303765678e-23	4.34130102450045e-21	376.309948113775	0.0606588398885827	0.717001122975618	0.998625307316004	376.309948113775	0.407131843793687
ENSG00000163875.11	MEAF6	chr1	37958176	37980375	-	22199	7279	375	262	269.592592592593	FALSE	265.271020701946	0.0279432375856972	0.865437026181056	0.937994960409835	265.271020701946	0.0368671615086515	0.82372215956033	0.917357452043249	265.271020701946	-0.233863417051066	0.161702779573733	0.280095691869822	265.271020701946	-0.0810836998298898	0.623777415731566	0.737231172218208	265.271020701946	0.124386699017022	0.45146443786957	0.731595381693856	265.271020701946	0.000736400344333088	0.99646178712169	0.997921722119163	265.271020701946	0.107505283993794	0.51516012255353	0.662064999153024	265.271020701946	-0.0624430021635509	0.708125366835253	0.808064981340446	265.271020701946	0.0964434614313243	0.557619678809267	0.998625307316004	265.271020701946	-0.0361307611643184
ENSG00000163877.9	SNIP1	chr1	38000050	38019903	-	19853	1131	61	43	41.8888888888889	FALSE	41.2440197863851	0.218516867897577	0.40151967344356	0.668772974361664	41.2440197863851	0.0383062254261468	0.885954586328513	0.946803596986847	41.2440197863851	-0.219680026974583	0.423376749316931	0.56864053724762	41.2440197863851	0.433221397490036	0.0904329374510435	0.177079568574256	41.2440197863851	0.286483357045365	0.274770989237569	0.585378808526742	41.2440197863851	0.22679872711755	0.390998835630969	0.600798141694068	41.2440197863851	0.301280996183448	0.248855653325284	0.400168536997553	41.2440197863851	0.551618961162652	0.0331072826031329	0.0841731452564255	41.2440197863851	0.0679664891477884	0.789631015706492	NA	41.2440197863851	0.188492501691403
ENSG00000134697.8	GNL2	chr1	38032417	38061536	-	29119	7018	360	256	259.925925925926	FALSE	256.61199513644	0.024543396125224	0.885612894219959	0.946603146655306	256.61199513644	-0.793063653448927	6.74000235098139e-06	0.000274732389407434	256.61199513644	-0.321783625190782	0.0629032599381153	0.136631231437324	256.61199513644	-0.223475913276937	0.19285121889003	0.315427800254532	256.61199513644	-0.384554475081568	0.0266782378521606	0.171660261806154	256.61199513644	-0.0395116244634495	0.818102263581123	0.904523667311417	256.61199513644	-0.336828841351253	0.0516900518830431	0.125428126988728	256.61199513644	-0.0715744359632857	0.677806200054549	0.786076737292734	256.61199513644	-0.409097871206792	0.0179905843897878	0.714884609749185	256.61199513644	0.753552028985477
ENSG00000134690.6	CDCA8	chr1	38158090	38175391	+	17301	8271	468	323	306.333333333333	FALSE	302.86178195884	-0.032498711790574	0.84522997858936	0.92931373295534	302.86178195884	0.13615037933166	0.412981590036067	0.65362209876712	302.86178195884	0.00624218937655787	0.970167045919052	0.982999358042953	302.86178195884	-0.906544794794021	1.2298004117339e-07	1.4888292178021e-06	302.86178195884	0.307208969397889	0.0637845608589314	0.278657624283414	302.86178195884	0.178485204138481	0.283450687767258	0.492422837047869	302.86178195884	0.197351515056364	0.234763088062561	0.384110624290907	302.86178195884	-0.713822334103758	3.35365941040536e-05	0.000277215046705693	302.86178195884	0.339707681188463	0.0399567614940884	0.854367383147873	302.86178195884	0.0423348248068204
ENSG00000185090.10	MANEAL	chr1	38259474	38266809	+	7335	1975	100	74	73.1481481481482	FALSE	72.0340620247264	0.223197969127465	0.285987688703728	0.570434702990197	72.0340620247264	0.114286348470228	0.590881971387375	0.787481278724311	72.0340620247264	0.367708916518784	0.0785412155500617	0.162242312934169	72.0340620247264	0.192032215461295	0.358750858231629	0.498648541568318	72.0340620247264	0.465942235833132	0.0250786537791576	0.165195639348847	72.0340620247264	0.180137903472311	0.397071822646835	0.604839463025649	72.0340620247264	0.0915835438370798	0.667317362791289	0.783820172347384	72.0340620247264	-0.235579562489782	0.288074686452797	0.433943323244543	72.0340620247264	0.242744266705667	0.230976007424088	0.998625307316004	72.0340620247264	0.0658515550020836
ENSG00000196449.3	YRDC	chr1	38268616	38273857	-	5241	3240	203	119	120	FALSE	118.781448615804	-0.0349191236123794	0.895537328663436	0.951423476381252	118.781448615804	-0.430517167141445	0.111168708130671	0.306879509303866	118.781448615804	-1.06564182524326	0.000126826581856625	0.000846717510426725	118.781448615804	-0.154363557657986	0.562580817774489	0.686782957376578	118.781448615804	0.166465207898334	0.530873117352741	0.786852518915389	118.781448615804	-0.0822797156966283	0.75861352525715	0.867126290897226	118.781448615804	0.0361510874993986	0.892063526403403	0.939203376258369	118.781448615804	0.616686754142642	0.0192750963110915	0.0552573021029619	118.781448615804	0.201384331510713	0.447434353664165	0.998625307316004	118.781448615804	0.348237451444816
ENSG00000197982.12	C1orf122	chr1	38272651	38275126	+	2475	12108	591	436	448.444444444444	FALSE	441.623945189196	-0.0690445260094189	0.661824248805046	0.838577437721117	441.623945189196	0.0572064925900604	0.717068750024171	0.859097139730387	441.623945189196	0.106722795086033	0.498632328355062	0.638358575099133	441.623945189196	-0.355071403960063	0.0253031444048317	0.0649087012648194	441.623945189196	0.0407595954412221	0.796428227494855	0.925226987778701	441.623945189196	-0.148258386449137	0.350501378756198	0.563493884888128	441.623945189196	-0.0107366890158998	0.945862303878187	0.969310129775532	441.623945189196	-0.277246372036162	0.0822945490260184	0.169944076840623	441.623945189196	0.109804121450641	0.486694204411004	0.998625307316004	441.623945189196	-0.205464879039197
ENSG00000188786.9	MTF1	chr1	38275239	38325292	-	50053	2500	121	93	92.5925925925926	FALSE	91.4061137243935	0.104839306116291	0.545092671644313	0.76640719623914	91.4061137243935	-0.0319814073847154	0.856688165632999	0.934698959609399	91.4061137243935	-0.108527324424939	0.543606412377776	0.675679434948243	91.4061137243935	-0.036957870480217	0.832680583498806	0.889433785908209	91.4061137243935	0.364295800910336	0.0339873628318773	0.197251064306559	91.4061137243935	0.0379938808009055	0.830198329624531	0.911095758557933	91.4061137243935	0.324516684474017	0.0590571602952836	0.138794479339828	91.4061137243935	0.456602891390389	0.00790108084501936	0.0270659230488983	91.4061137243935	0.259456494794045	0.123634832848033	0.975431061423351	91.4061137243935	0.0699752881856209
ENSG00000183431.7	SF3A3	chr1	38422647	38456593	-	33946	7338	454	283	271.777777777778	FALSE	266.205923461006	-0.355084614100015	0.00196235588437323	0.0347085942787562	266.205923461006	-0.42719394053151	0.000232867631841012	0.0043019995354246	266.205923461006	-0.727409820576893	8.86027551924723e-10	2.12790292605489e-08	266.205923461006	-0.568357040756399	9.64640185695194e-07	9.67470958249153e-06	266.205923461006	-0.423261281734754	0.000273616610254808	0.00957227243592213	266.205923461006	-0.532196513036626	5.8931746939209e-06	0.000198358902765838	266.205923461006	-0.635595923227612	6.8506401391064e-08	1.29796989927717e-06	266.205923461006	-0.526245246032826	8.15917865644839e-06	8.07377077296218e-05	266.205923461006	-0.0681766676347393	0.56273679542287	0.998625307316004	266.205923461006	-0.105002572505116
ENSG00000183520.7	UTP11L	chr1	38474930	38490496	+	15566	6683	332	248	247.518518518519	FALSE	243.019423984935	-0.201891366680344	0.111869958247633	0.34787032413838	243.019423984935	-0.15556168426855	0.222648858614792	0.462688904969842	243.019423984935	-0.231811944023676	0.0707365854446935	0.149838662044572	243.019423984935	-0.121792714226461	0.334526904876809	0.473779410908873	243.019423984935	-0.0583561053503158	0.646075568184132	0.851658136609434	243.019423984935	-0.135413047930182	0.28994184636419	0.499500435593678	243.019423984935	-0.273098640193579	0.0336678156327378	0.0893851836607434	243.019423984935	0.0335672527945031	0.791734857392282	0.866686868024413	243.019423984935	0.143535261330028	0.261168441473649	0.998625307316004	243.019423984935	0.0201486363383679
ENSG00000116954.7	RRAGC	chr1	39303870	39325495	-	21625	37899	2015	1349	1403.66666666667	FALSE	1375.70977101453	0.199234414869654	0.079843119085655	0.292571528327889	1375.70977101453	0.311482031689746	0.00618596145933516	0.0465834351929256	1375.70977101453	0.566654359608868	5.85092846727292e-07	7.48076983599815e-06	1375.70977101453	0.557597291291196	8.46247423666553e-07	8.57440662109577e-06	1375.70977101453	0.265393632017338	0.0197845184293226	0.144695663179392	1375.70977101453	0.278755678251238	0.0144100054275714	0.0695153682027142	1375.70977101453	0.0839595022535775	0.462082888621318	0.612023930286038	1375.70977101453	0.308104888305616	0.00686449031741987	0.0241671398417563	1375.70977101453	0.0661592171476836	0.559468006669356	0.998625307316004	1375.70977101453	-0.0327263534385087
ENSG00000214114.4	MYCBP	chr1	39328636	39347289	-	18653	810	52	29	30	FALSE	29.5305789029317	-0.686065197713084	0.00774661968970042	0.0827361328878341	29.5305789029317	-1.12795483871043	4.8667606938479e-05	0.0013144691649098	29.5305789029317	-0.454393555071904	0.0742953289622082	0.155558033260646	29.5305789029317	-1.17688876460972	1.76517057380271e-05	0.000132903323362214	29.5305789029317	-0.109295902711926	0.656823967931495	0.857557710702214	29.5305789029317	-0.547364009432399	0.0346974454355421	0.124373336079156	29.5305789029317	-0.357415005976596	0.155110054708719	0.288348942707463	29.5305789029317	-1.34475437332911	5.00333551833343e-06	5.23146803170565e-05	29.5305789029317	0.576769295001157	0.0271538226846286	NA	29.5305789029317	0.58059082927803
ENSG00000174574.11	AKIRIN1	chr1	39456895	39471731	+	14836	6445	340	232	238.703703703704	FALSE	234.917843015959	-0.234886468543577	0.0702238151278184	0.275257530315745	234.917843015959	0.086395816712471	0.500126189656996	0.722739835893049	234.917843015959	-0.00833385741044276	0.948472950535714	0.971073813886199	234.917843015959	0.065188777673975	0.608322549013289	0.725946565863471	234.917843015959	-0.208274168039835	0.111543835765223	0.374348787493813	234.917843015959	-0.0878194611301949	0.499715577887548	0.68921587044882	234.917843015959	0.124805793207532	0.329158757903162	0.484967905452865	234.917843015959	0.2935011450418	0.0214136387948748	0.0600257395366742	234.917843015959	0.0266123005037429	0.840098282497366	0.998625307316004	234.917843015959	-0.174215277842666
ENSG00000168653.6	NDUFS5	chr1	39491990	39500308	+	8318	19604	1027	690	726.074074074074	FALSE	712.407991569538	-0.251216773306815	0.0345543053528213	0.194704855653247	712.407991569538	-0.136302013615172	0.251643300937282	0.497575071679726	712.407991569538	0.0358938878026026	0.761875668816182	0.844053809416762	712.407991569538	-0.289723424239515	0.0148127385478706	0.0422419752042293	712.407991569538	-0.29667061997528	0.0130127401682099	0.113755325772728	712.407991569538	-0.211169856600974	0.0767397511991709	0.211206866857257	712.407991569538	-0.0603329943251581	0.611307186927653	0.740973354663637	712.407991569538	-0.161809924888215	0.175146796139056	0.30115217308275	712.407991569538	-0.0454538466684645	0.704446193180904	0.998625307316004	712.407991569538	-0.0748678429858022
ENSG00000127603.19	MACF1	chr1	39546988	39952849	+	405861	24062	1360	861	891.185185185185	FALSE	877.17657945433	-0.0648884933804974	0.50600079463424	0.742691504734181	877.17657945433	0.261761653552148	0.00694705252558147	0.050560843413859	877.17657945433	0.610166038997823	2.18063686791446e-10	5.81896072320959e-09	877.17657945433	0.254487928208354	0.00841179452035386	0.0265126349627701	877.17657945433	-0.0174443726709223	0.858606876239748	0.949115382933973	877.17657945433	0.38575527308389	6.75855040253704e-05	0.00130557562775966	877.17657945433	0.412322598386526	1.96813476604084e-05	0.000199416710730204	877.17657945433	0.194602527748681	0.0460393156359465	0.108458472624873	877.17657945433	0.0474441207095751	0.627491283140531	0.998625307316004	877.17657945433	0.123993619531742
ENSG00000090621.9	PABPC4	chr1	40026488	40042462	-	15974	19566	1391	669	724.666666666667	FALSE	709.51381689861	-0.597457702080095	0.000424334455988527	0.0133756748445186	709.51381689861	-0.255612067212396	0.1306856543536	0.338454293306176	709.51381689861	-0.652073352314609	0.000124321747307846	0.000835645269725809	709.51381689861	-0.938575789940981	3.50912802173008e-08	4.83443590714628e-07	709.51381689861	-0.336927422308346	0.0465937004212841	0.238268110947431	709.51381689861	-0.491694880796906	0.00376219960546137	0.0276060327779767	709.51381689861	-0.326239029847497	0.0539347148179338	0.129811450669599	709.51381689861	-0.768912966108806	6.49617855840976e-06	6.59714773371761e-05	709.51381689861	0.260530279771749	0.125704374029319	0.975431061423351	709.51381689861	-0.23608281358451
ENSG00000084072.12	PPIE	chr1	40157854	40229586	+	71732	2302	137	82	85.2592592592593	FALSE	83.5355207380282	-0.173049332683693	0.363484019706134	0.638828915962957	83.5355207380282	-0.0440059656034181	0.817073022077273	0.913799480953616	83.5355207380282	-0.110337552474404	0.564485827332622	0.6932993865484	83.5355207380282	-0.0819390737422523	0.664124137113053	0.769715283994599	83.5355207380282	-0.377921034925561	0.0544555114487643	0.256392067065152	83.5355207380282	0.132406653757219	0.482977782236646	0.676610527030559	83.5355207380282	0.188620877344179	0.313390684807714	0.46716819748387	83.5355207380282	0.0204146859562079	0.915035275501044	0.949218241664987	83.5355207380282	-0.204871702241868	0.29939835069865	0.998625307316004	83.5355207380282	0.176412619360637
ENSG00000043514.11	TRIT1	chr1	40306723	40349183	-	42460	1937	105	74	71.7407407407407	FALSE	70.7304487851791	0.17172540465888	0.451413293491971	0.705537166033448	70.7304487851791	-0.192834742247417	0.411305512300704	0.652087126335423	70.7304487851791	-0.254250592124238	0.281174119546223	0.42221959054947	70.7304487851791	-0.0369245190735681	0.872616640911949	0.917235802557709	70.7304487851791	0.0434026350875934	0.851404456601818	0.947633386826811	70.7304487851791	-0.0552555151546857	0.81306651814512	0.902324101440931	70.7304487851791	-0.160502740595049	0.493339910650049	0.642317721030965	70.7304487851791	0.0545128087140824	0.814977328181928	0.883911697574102	70.7304487851791	-0.128322769571286	0.573667301896787	0.998625307316004	70.7304487851791	0.137579227092732
ENSG00000168389.13	MFSD2A	chr1	40420802	40435638	+	14836	596	51	18	22.0740740740741	FALSE	21.7021856622663	0.10492566598659	0.753507835414919	0.887431494432998	21.7021856622663	-0.788643381957901	0.0386937305527662	0.159551039300176	21.7021856622663	-0.960606599119112	0.0148077383969469	0.0433833047791856	21.7021856622663	1.13966140791782	0.000201094800384722	0.00110920446692653	21.7021856622663	-0.0939860353434506	0.787084153622203	0.9191785765655	21.7021856622663	0.370740764019987	0.263348318592269	0.470563675650693	21.7021856622663	0.038498120492009	0.910042045391802	0.949524632060675	21.7021856622663	1.40665210545545	4.54300157037101e-06	4.82884114286086e-05	21.7021856622663	-0.198911701330041	0.558753739247203	NA	21.7021856622663	1.15938414597789
ENSG00000131236.12	CAP1	chr1	40505905	40538321	+	32416	33879	1725	1169	1254.77777777778	FALSE	1231.29390538089	-0.185462675685813	0.0445956896081287	0.218651289634067	1231.29390538089	0.195558689448799	0.0332008736259758	0.14471939629756	1231.29390538089	0.270312823350534	0.0032001153431994	0.0127174530141636	1231.29390538089	-0.0191994270848976	0.834577165460535	0.891031201764065	1231.29390538089	-0.175262237023968	0.058616726920269	0.265447707848397	1231.29390538089	0.0104504010202467	0.909888323473523	0.954802508548149	1231.29390538089	0.0968543093250222	0.292645131991741	0.444976838274916	1231.29390538089	-0.159844917737897	0.0852721775105311	0.174490507824526	1231.29390538089	0.0102004386618448	0.912509139738357	0.998625307316004	1231.29390538089	-0.185108288428552
ENSG00000131238.12	PPT1	chr1	40538379	40563375	-	24996	7754	491	280	287.185185185185	FALSE	281.712840731063	0.0466357652864643	0.683663116803336	0.850606336588413	281.712840731063	0.233047872983333	0.0407482545718333	0.164511126817497	281.712840731063	0.444602723830385	7.66433002171512e-05	0.000555961114881311	281.712840731063	0.786895120523841	6.36292756236303e-13	1.98389383575992e-11	281.712840731063	0.0472778063947721	0.6830637675417	0.871207785040267	281.712840731063	0.115346791338889	0.317926446754423	0.529142986675371	281.712840731063	0.296953252821625	0.00886151477946636	0.0315604891103559	281.712840731063	0.740390530858131	2.84158720665781e-11	9.67446127140279e-10	281.712840731063	0.000642041108307785	0.99552386217409	0.999638052598611	281.712840731063	-0.117701081644444
ENSG00000117000.8	RLF	chr1	40627045	40706593	+	79548	7511	422	268	278.185185185185	FALSE	273.727334070126	0.212192406523549	0.184912228465419	0.45961680059964	273.727334070126	0.45752044238769	0.00410342772700046	0.0347929950211127	273.727334070126	0.560695856310259	0.000418705993339857	0.00234624920813873	273.727334070126	0.410091419722511	0.0098437989435156	0.0302148523012365	273.727334070126	0.312221410462404	0.0515436387700714	0.250008733146526	273.727334070126	0.325903990592296	0.0423040638755927	0.142122461851991	273.727334070126	0.42285310024161	0.00807766207587455	0.0293331038848473	273.727334070126	0.5617427044273	0.00042933045615456	0.00243305512333509	273.727334070126	0.100029003938855	0.527521234729585	0.998625307316004	273.727334070126	-0.131616451795393
ENSG00000084073.4	ZMPSTE24	chr1	40723779	40759856	+	36077	3092	179	108	114.518518518519	FALSE	112.264537371266	0.0165528556769728	0.91789644006891	0.961956335234384	112.264537371266	-0.068030844687015	0.676031702040762	0.837593098763833	112.264537371266	-0.264777976063692	0.109439116637822	0.209856709202349	112.264537371266	-0.399535256622014	0.0155150514117514	0.0438368034482743	112.264537371266	-0.170783511265258	0.299158029047511	0.609286785724543	112.264537371266	-0.628768059314869	0.000251612782314763	0.00349192364746262	112.264537371266	-0.20561379311496	0.211432163040545	0.35657358147244	112.264537371266	-0.528807384995725	0.00200505524809423	0.008807177921189	112.264537371266	-0.187336366942231	0.250927645089672	0.998625307316004	112.264537371266	-0.560737214627854
ENSG00000084070.7	SMAP2	chr1	40810522	40888998	+	78476	1772	84	67	65.6296296296296	FALSE	64.7177502373134	0.00858787735347145	0.963386053854812	0.984095697730068	64.7177502373134	0.100887131693917	0.590434369615798	0.787423053940564	64.7177502373134	0.158424535643784	0.396254894904016	0.54321521075549	64.7177502373134	-0.15578120077293	0.411419765238203	0.552998946287501	64.7177502373134	0.0136221573044749	0.942813814109208	0.97953800504559	64.7177502373134	0.186311208378929	0.319802931226503	0.531171747080131	64.7177502373134	-0.035790696900746	0.850654071802861	0.91324297233783	64.7177502373134	-0.465363250239723	0.0221098135182373	0.0614922700854638	64.7177502373134	0.00503427995100347	0.978608749196692	0.998726332951763	64.7177502373134	0.085424076685012
ENSG00000164002.7	EXO5	chr1	40974413	40982228	+	7815	1293	75	45	47.8888888888889	FALSE	47.0968853505112	-0.0565001626013961	0.795811053267322	0.90647165242707	47.0968853505112	-0.504260342563834	0.0294089501894325	0.13346676781578	47.0968853505112	0.0577733947963893	0.791636197239116	0.866635363886508	47.0968853505112	-0.357851441445551	0.110592891304467	0.206542335462694	47.0968853505112	-0.165405310926084	0.46033878273295	0.738305409959317	47.0968853505112	-0.0725421429400318	0.744592123061907	0.859725260593569	47.0968853505112	-0.0957743596890658	0.665615472586847	0.782597895166667	47.0968853505112	-0.318078255727675	0.167310871395529	0.290432585118318	47.0968853505112	-0.108905148324688	0.625327592808191	NA	47.0968853505112	0.431718199623803
ENSG00000066136.15	NFYC	chr1	41157320	41237275	+	79955	2481	124	93	91.8888888888889	FALSE	90.7977356050002	0.00487901987615563	0.978580538702935	0.990846247369449	90.7977356050002	0.0764414517115804	0.675077669607416	0.836836455371634	90.7977356050002	0.0278522593240423	0.879205088945336	0.924788875517076	90.7977356050002	0.127582408840027	0.477874449504388	0.613817918227232	90.7977356050002	0.0803851154569442	0.660195902036483	0.859182891841855	90.7977356050002	-0.0377840409665542	0.838285333668865	0.916123905421416	90.7977356050002	-0.151357060748927	0.41543460466897	0.568105862894501	90.7977356050002	0.214394435326596	0.239651737290441	0.378787857979875	90.7977356050002	0.0755060955807886	0.676946188637804	0.998625307316004	90.7977356050002	-0.114225492678135
ENSG00000171793.9	CTPS1	chr1	41445007	41478235	+	33228	6222	476	214	230.444444444444	FALSE	226.149494925354	-0.451412712904074	0.000262191704804388	0.0101029658836271	226.149494925354	-0.726534616781949	1.02512450070466e-08	1.30132233046595e-06	226.149494925354	-0.874934362456376	9.56345573419145e-12	3.15914006148793e-10	226.149494925354	-0.834490814539553	4.23126123905160e-11	9.9205771425363e-10	226.149494925354	-0.609831556598062	1.33696958215909e-06	0.000228467532828187	226.149494925354	-0.474841293338706	0.000151079547415723	0.00239303539810359	226.149494925354	-0.881761283701988	6.58961051899084e-12	2.88449650599766e-10	226.149494925354	-0.682822039090741	8.97591154211665e-08	1.46887568993091e-06	226.149494925354	-0.158418843693989	0.216771211823764	0.998625307316004	226.149494925354	0.251693323443243
ENSG00000010803.12	SCMH1	chr1	41492872	41707826	-	214954	3087	179	111	114.333333333333	FALSE	112.698778704032	0.45268878378683	0.0331499427649809	0.19054328924402	112.698778704032	0.688250013087117	0.00112855493920221	0.0140132514789977	112.698778704032	0.955908240692138	4.80689786544406e-06	4.98996430284298e-05	112.698778704032	0.687324830095331	0.00106158082854148	0.00462185558178325	112.698778704032	0.582493096043607	0.00618873610823699	0.0728385550434356	112.698778704032	0.739056161021024	0.000476147490471795	0.00578011830646499	112.698778704032	0.807673770913077	0.000122835571524447	0.000940635827479664	112.698778704032	0.769358821550404	0.00028153891740591	0.00171353069867734	112.698778704032	0.129804312256777	0.527426764651617	0.998625307316004	112.698778704032	0.0508061479339074
ENSG00000127129.5	EDN2	chr1	41944446	41950344	-	5898	202	29	4	7.48148148148148	FALSE	7.22473695965046	-0.535845813834538	0.210025318573148	0.48971004482839	7.22473695965046	-1.87806211751777	0.000207129532067856	0.00393280560246789	7.22473695965046	-3.71215682121184	6.87118241449196e-07	8.69762491954068e-06	7.22473695965046	-4.58634764419906	4.7693840597417e-07	5.0634106039265e-06	7.22473695965046	-0.52529981648351	0.22472638491971	0.530249244927389	7.22473695965046	-2.39745386454148	1.97162889627103e-05	0.000492131864389448	7.22473695965046	-6.88896756351414	2.49893296217202e-08	5.32506434097377e-07	7.22473695965046	-4.32101359956394	2.31000493806375e-06	2.63667264832651e-05	7.22473695965046	0.0105459973510288	0.981094667695574	NA	7.22473695965046	-0.519391747023711
ENSG00000127124.9	HIVEP3	chr1	41972036	42501596	-	529560	434	40	14	16.0740740740741	FALSE	15.756501891469	-0.21276334053194	0.544189742072365	0.765986068122134	15.756501891469	-0.947268398443057	0.0126934868001692	0.0773623619384799	15.756501891469	-0.979447303298805	0.0104160083607715	0.0328098724898318	15.756501891469	-1.12841106652546	0.00313246831569629	0.0116856059837436	15.756501891469	-0.696869392772523	0.0606702166588928	0.270776265811613	15.756501891469	-1.2678477572077	0.0015083371089162	0.0139126495167292	15.756501891469	-1.45179352045766	0.000345544470243791	0.00222500591491763	15.756501891469	-1.24922778406844	0.00189669446398967	0.00842942152898332	15.756501891469	-0.484106052240583	0.19549997063816	NA	15.756501891469	-0.320579358764639
ENSG00000198815.4	FOXJ3	chr1	42642210	42801548	-	159338	2629	127	98	97.3703703703704	FALSE	96.1514729725115	0.0605399242807481	0.705554342544673	0.864004758878003	96.1514729725115	-0.163163455812509	0.323857555126968	0.571899490234149	96.1514729725115	-0.126537829186246	0.443366499520186	0.588726048227193	96.1514729725115	0.126029766943852	0.427943005702624	0.568840919771656	96.1514729725115	-0.0812595312843452	0.621800829074109	0.837522088422461	96.1514729725115	-0.0581878539754684	0.72418010248811	0.846163000377373	96.1514729725115	-0.0361422789848295	0.824940233604519	0.894842968311919	96.1514729725115	0.338075804425109	0.0344873308288108	0.0867160219990983	96.1514729725115	-0.141799455565093	0.382311314446655	0.998625307316004	96.1514729725115	0.10497560183704
ENSG00000177181.10	RIMKLA	chr1	42846466	42888249	+	41783	405	40	12	15	FALSE	14.7721309650566	0.131577011746205	0.743956494445456	0.883103712262136	14.7721309650566	-0.619600761399314	0.169375824673772	0.394101486790034	14.7721309650566	-0.243832398713699	0.569216840695002	0.69670259592504	14.7721309650566	1.40172968777252	0.00011617766309555	0.000688236476178036	14.7721309650566	0.171659038104673	0.673971172154338	0.86632544998748	14.7721309650566	-0.12622116264871	0.766410935817353	0.871554591204633	14.7721309650566	-0.087394087785162	0.83460817419078	0.900805081484182	14.7721309650566	1.25004423713697	0.000816432257297441	0.00417904207277941	14.7721309650566	0.040082026358468	0.91953538015472	NA	14.7721309650566	0.493379598750604
ENSG00000127125.7	PPCS	chr1	42921788	42939056	+	17268	6384	428	229	236.444444444444	FALSE	231.377455071833	-0.429100340112752	0.000835272787594887	0.0200600918664005	231.377455071833	-0.545803641773506	2.85020273833771e-05	0.000838639123604929	231.377455071833	-0.256184639662511	0.045571570190693	0.106846694647625	231.377455071833	-0.436258297880267	0.000672042158169838	0.00312004525470072	231.377455071833	-0.609322396940567	3.4912581065189e-06	0.000449613326587348	231.377455071833	-0.41556224181928	0.00137766510798824	0.013023332074025	231.377455071833	-0.36087116945611	0.00512166002814574	0.0205282232792526	231.377455071833	-0.288335486270887	0.0257968269811196	0.0691286503480786	231.377455071833	-0.180222056827815	0.176954083841951	0.993799788825718	231.377455071833	0.130241399954226
ENSG00000171960.6	PPIH	chr1	43124096	43142429	+	18333	6593	375	243	244.185185185185	FALSE	239.576857829076	0.132399967223333	0.38739977813331	0.657831918305483	239.576857829076	-0.082726098314416	0.594054707949374	0.78930461628556	239.576857829076	0.0460537376888312	0.765561413039135	0.846537918898178	239.576857829076	-0.250016904569135	0.107458698979321	0.202005077031997	239.576857829076	0.0669235648465216	0.664799266530627	0.861471449343592	239.576857829076	0.110811242162429	0.472973419252438	0.668688275257964	239.576857829076	-0.0848170916359606	0.584936900746321	0.718516629808102	239.576857829076	-0.26972893081828	0.0869050892411863	0.176997163189819	239.576857829076	-0.065476402376811	0.668761819005117	0.998625307316004	239.576857829076	0.193537340476845
ENSG00000065978.13	YBX1	chr1	43148098	43168020	+	19922	20793	1368	745	770.111111111111	FALSE	758.448568422752	0.42349686819912	0.0261523860027977	0.164521977813739	758.448568422752	0.307974563448156	0.106562378183928	0.298522475580826	758.448568422752	0.422595156723039	0.0266431171043341	0.0691098001183359	758.448568422752	0.372657718769354	0.0503922752178032	0.11253726001141	758.448568422752	0.301136082124565	0.114668881312247	0.379875830035569	758.448568422752	0.434884533769603	0.022594318474726	0.0940829962354334	758.448568422752	0.689866644816818	0.00028766106243252	0.00190190193510072	758.448568422752	0.620618303238301	0.00112340791586304	0.00543123108833457	758.448568422752	-0.122360786074555	0.519366824648754	0.998625307316004	758.448568422752	0.126909970321447
ENSG00000117385.11	LEPRE1	chr1	43212006	43232755	-	20749	1181	68	41	43.7407407407407	FALSE	43.138554633599	0.258922261639096	0.277875350941497	0.562460220607323	43.138554633599	0.103000636688214	0.673533406437738	0.836013109317745	43.138554633599	0.49822334981134	0.035164262443957	0.086724850423814	43.138554633599	0.011566207660194	0.962092580017463	0.976488254258729	43.138554633599	0.0251822762045784	0.918933047915835	0.974440948528135	43.138554633599	0.0049404183682109	0.98415705009223	0.991165054966995	43.138554633599	0.434581586053223	0.0672898168280297	0.152925143819405	43.138554633599	0.0839394106751842	0.735464851594094	0.827379030260922	43.138554633599	-0.233739985434517	0.328500019011027	NA	43.138554633599	-0.0980602183200027
ENSG00000177868.7	CCDC23	chr1	43272723	43282954	-	10231	1007	62	37	37.2962962962963	FALSE	36.6323625040771	-0.0528481752873316	0.852598744771831	0.931732723680604	36.6323625040771	0.0635866437270404	0.823122374677212	0.917149269138772	36.6323625040771	-0.111228574943349	0.69992308212455	0.801174353698151	36.6323625040771	-0.534927979084804	0.070001171936794	0.144961643866314	36.6323625040771	-0.0284651584306928	0.921058253752122	0.975393116772894	36.6323625040771	0.0248370675618693	0.930993991196185	0.965882048256877	36.6323625040771	0.331674106638467	0.235407877963498	0.384740556112497	36.6323625040771	-0.783847379132119	0.0120261090650431	0.037908480011342	36.6323625040771	0.0243830168566388	0.932074065344861	NA	36.6323625040771	-0.0387495761651711
ENSG00000117394.15	SLC2A1	chr1	43391052	43424530	-	33478	7393	490	268	273.814814814815	FALSE	269.456529075534	0.262909256457334	0.0401660813771242	0.207871752543463	269.456529075534	0.290038348298788	0.0244134742214137	0.118286876734723	269.456529075534	0.761747634141081	1.29126948558784e-09	2.98031705167105e-08	269.456529075534	0.885579336137496	8.79015087647649e-13	2.71212780167952e-11	269.456529075534	0.147179383201582	0.259283396947295	0.569027479692186	269.456529075534	0.660315366358637	1.82354001600894e-07	1.16575371095363e-05	269.456529075534	0.94454887199593	3.17186939138538e-14	1.89162626925171e-12	269.456529075534	0.929990831023555	1.11526619703345e-13	5.76177641095303e-12	269.456529075534	-0.115729873255752	0.362597826937578	0.998625307316004	269.456529075534	0.370277018059849
ENSG00000117395.6	EBNA1BP2	chr1	43629846	43736607	-	106761	15482	923	567	573.407407407407	FALSE	562.288431900306	-0.091296994494265	0.503022035845044	0.741638262903445	562.288431900306	-0.512547947853753	0.000199979540102257	0.00382532681567003	562.288431900306	-0.635509788180511	4.29275761280738e-06	4.5529025513199e-05	562.288431900306	-0.638885208359503	3.49944145394925e-06	3.12240895822288e-05	562.288431900306	-0.466961145236944	0.000699469582361446	0.017860593990988	562.288431900306	-0.302273627328008	0.0277690049103529	0.107338137766626	562.288431900306	-0.835407320681501	1.8670443134896e-09	5.12054190421869e-08	562.288431900306	-0.728893954099425	1.59307928666138e-07	2.4449227187e-06	562.288431900306	-0.375664150742679	0.00637221232886549	0.498422567783062	562.288431900306	0.210274320525745
ENSG00000117399.9	CDC20	chr1	43824626	43828874	+	4248	5782	388	223	214.148148148148	FALSE	210.937956002614	-0.236007022717356	0.122094394003369	0.366159562981416	210.937956002614	-0.524458614969689	0.000724021194918376	0.0103361678526177	210.937956002614	-0.727664932165625	3.43098547373705e-06	3.73844571643234e-05	210.937956002614	-2.11427987897403	5.3816029924101e-35	1.32835900529323e-32	210.937956002614	-0.201467192624517	0.188819370775185	0.49084362184469	210.937956002614	-0.576503189305295	0.000219555311050347	0.00314672337740868	210.937956002614	-0.62283686671542	6.47399658302904e-05	0.00054945495355106	210.937956002614	-1.64426661809303	1.49739560866247e-22	2.04705498131919e-20	210.937956002614	0.0345398300928386	0.822465818846101	0.998625307316004	210.937956002614	-0.052044574335606
ENSG00000066322.8	ELOVL1	chr1	43829068	43833696	-	4628	4791	359	169	177.444444444444	FALSE	172.241437011728	-0.518373734225794	0.00708390922526672	0.0790588074475928	172.241437011728	-0.219135660815607	0.252335296571488	0.498056740411871	172.241437011728	-0.621443397632005	0.00137193380578436	0.00635941773510686	172.241437011728	-0.759457861733218	9.04469716876829e-05	0.000550864832362406	172.241437011728	-0.623448681313379	0.00133750194226344	0.0277047405557537	172.241437011728	-0.90596840850386	4.2970865374861e-06	0.000160258993297196	172.241437011728	-0.602148907277992	0.00191358148046232	0.00920134471611915	172.241437011728	-0.843598269672287	1.86632346884791e-05	0.000167855772714398	172.241437011728	-0.105074947087586	0.593084804669565	0.998625307316004	172.241437011728	-0.686832747688253
ENSG00000159479.12	MED8	chr1	43849588	43855479	-	5891	8015	450	288	296.851851851852	FALSE	291.671050150204	0.059237445209406	0.677853183620921	0.848964536949331	291.671050150204	0.0103299147600889	0.942656479810068	0.972648104922464	291.671050150204	0.120409644119587	0.399804503606787	0.545891643984313	291.671050150204	0.2754153645606	0.0513971859942818	0.114454866427412	291.671050150204	0.150617324697382	0.292087412046368	0.602503613553851	291.671050150204	0.179056005752441	0.210547965038974	0.406886874841813	291.671050150204	0.00440354407940548	0.975552956000174	0.985646795567657	291.671050150204	0.11390530372046	0.428167418282618	0.576172940522186	291.671050150204	0.0913798794879758	0.519810646091652	0.998625307316004	291.671050150204	0.168726090992352
ENSG00000198198.9	SZT2	chr1	43855553	43918321	+	62768	937	58	34	34.7037037037037	FALSE	34.1619172368527	0.380065652046983	0.178746833062395	0.450977955307338	34.1619172368527	0.264196875169264	0.358980117170978	0.606367625279406	34.1619172368527	0.454269123716064	0.109606389086982	0.210112079821936	34.1619172368527	0.272164714521481	0.338665425598218	0.478210864749049	34.1619172368527	0.226123955711374	0.435588297546108	0.720386676343703	34.1619172368527	0.47028891392892	0.0987568649782455	0.248951348140905	34.1619172368527	0.206843073819128	0.475043245119863	0.624812651885006	34.1619172368527	0.449849838500658	0.116844860638675	0.222521095506914	34.1619172368527	-0.153941696335608	0.579091019328227	NA	34.1619172368527	0.206092038759656
ENSG00000178922.12	HYI	chr1	43916824	43919660	-	2836	11858	737	410	439.185185185185	FALSE	431.787519788411	-0.433122363905691	0.000568071670979881	0.015555085376825	431.787519788411	-0.108585125713981	0.384108361301357	0.628193670786216	431.787519788411	0.139758449940785	0.258935694191655	0.397598510210306	431.787519788411	-0.450539658826961	0.000335149362436943	0.00172924340936075	431.787519788411	-0.476118256580941	0.000171642818892553	0.00722502193158932	431.787519788411	-0.0858583528518657	0.491992052028087	0.683667823521787	431.787519788411	0.210864726790328	0.0878874189579936	0.1871029240203	431.787519788411	-0.404241765494433	0.00143960921654655	0.00670108302683742	431.787519788411	-0.0429958926752498	0.737158059509564	0.998625307316004	431.787519788411	0.0227267728621148
ENSG00000142949.12	PTPRF	chr1	43990858	44089343	+	98485	12169	884	414	450.703703703704	FALSE	442.949699737585	0.0324532490538755	0.809163967803831	0.91254926783563	442.949699737585	0.181694734392509	0.17604758686876	0.403748714270842	442.949699737585	0.689304884935498	1.98551903059355e-07	2.81842206163807e-06	442.949699737585	0.0307725626542049	0.818725593843417	0.880774288970049	442.949699737585	-0.202538830153704	0.137086885195991	0.414620170814014	442.949699737585	0.270325432027604	0.043963382608894	0.1453883951852	442.949699737585	0.639131329266138	1.46301354463765e-06	2.00932586671564e-05	442.949699737585	-0.100327215806558	0.461374839183016	0.606296483433937	442.949699737585	-0.234992079207579	0.0831181995147959	0.940977779045572	442.949699737585	0.0886306976350948
ENSG00000066135.8	KDM4A	chr1	44115829	44171186	+	55357	5423	305	195	200.851851851852	FALSE	198.026338266686	0.258682225313777	0.113388125827508	0.351190967620507	198.026338266686	0.0675164878249148	0.683710830293585	0.842058827164075	198.026338266686	0.541937485369032	0.000849558996116644	0.00426266586080886	198.026338266686	0.191535545155741	0.241876857828743	0.373664422577575	198.026338266686	0.23898926505111	0.146601700205875	0.427676529228302	198.026338266686	0.325065103803657	0.047832677600369	0.153878679751438	198.026338266686	0.299166807626156	0.0681778569130585	0.154535464373703	198.026338266686	0.0760999557358328	0.648132388637669	0.763833475521794	198.026338266686	-0.019692960262667	0.903141748991883	0.998625307316004	198.026338266686	0.257548615978742
ENSG00000132768.9	DPH2	chr1	44435672	44439041	+	3369	2081	101	79	77.0740740740741	FALSE	75.7257669916077	-0.230395731429715	0.183328296634079	0.457342853422355	75.7257669916077	-0.306346009860893	0.0829172467974479	0.257402365828733	75.7257669916077	-0.196606924896651	0.261051700513382	0.400087169845104	75.7257669916077	-0.023609911992434	0.889079409667954	0.92901689020572	75.7257669916077	-0.0989530717899744	0.568628687201789	0.808954991234702	75.7257669916077	-0.0591566398408474	0.733073608354871	0.85131762226896	75.7257669916077	-0.365069611409683	0.0401659515849886	0.102886897026292	75.7257669916077	-0.0783458709200931	0.654396583212464	0.769277422731307	75.7257669916077	0.13144265963974	0.454267493083453	0.998625307316004	75.7257669916077	0.247189370020046
ENSG00000117410.9	ATP6V0B	chr1	44440159	44443967	+	3808	35757	2295	1186	1324.33333333333	FALSE	1301.05817674385	0.326232831534013	0.0225272712193968	0.151994937020167	1301.05817674385	0.291231671621333	0.0420188829849112	0.167886598113274	1301.05817674385	0.162583782534131	0.256984555849058	0.395699007361598	1301.05817674385	1.04031593114171	2.59960681676902e-13	8.65172515873017e-12	1301.05817674385	0.403495686306866	0.00480824999809077	0.0622829584300795	1301.05817674385	0.269417691707929	0.0601925441284837	0.180158451465725	1301.05817674385	0.222960083051574	0.119851168620058	0.237298904714313	1301.05817674385	1.01824328066956	8.98215990395563e-13	3.93179669490393e-11	1301.05817674385	0.0772628547728535	0.58751485428886	0.998625307316004	1301.05817674385	-0.0218139799134035
ENSG00000117411.12	B4GALT2	chr1	44444615	44456840	+	12225	16059	935	564	594.777777777778	FALSE	584.686747423094	-0.232889874127417	0.0710548378048271	0.277239293350215	584.686747423094	0.0192944472968441	0.880744831577009	0.944019591687795	584.686747423094	0.318942979783963	0.0125487238287389	0.038345240695383	584.686747423094	-0.0346060478310473	0.787359841242423	0.860787346122068	584.686747423094	-0.0184477400902194	0.886124846905867	0.959671589226756	584.686747423094	-0.0311213349969553	0.80933961128003	0.899761264335587	584.686747423094	0.097189526286541	0.449086589148818	0.600491123333387	584.686747423094	-0.184134451226388	0.155903745021281	0.275091477017296	584.686747423094	0.214442134037197	0.0969979568590602	0.950870257346934	584.686747423094	-0.0504157822937995
ENSG00000178028.9	DMAP1	chr1	44679127	44686353	+	7226	2031	154	69	75.2222222222222	FALSE	73.741817354981	-0.329655091634853	0.138395029542407	0.395607339374225	73.741817354981	-0.326027161054073	0.14588151811079	0.360785741701219	73.741817354981	-0.237394445905838	0.287197901798541	0.428983429577357	73.741817354981	-0.404765542589409	0.0697119384972618	0.144497384065003	73.741817354981	-0.262364327073067	0.240995063504967	0.547833751421113	73.741817354981	-0.112532884324937	0.612375541361417	0.775815377892436	73.741817354981	-0.0607422940605019	0.782997902787594	0.867654241697289	73.741817354981	-0.426625730915961	0.0614025154117354	0.135356673765488	73.741817354981	0.0672907645617862	0.766542996133177	0.998625307316004	73.741817354981	0.213494276729135
ENSG00000187147.13	RNF220	chr1	44870866	45117396	+	246530	12538	596	458	464.37037037037	FALSE	456.333069048748	-0.17329917740343	0.111885368713424	0.34787032413838	456.333069048748	-0.202020353548532	0.0656515964712332	0.222579201161151	456.333069048748	-0.150815292336788	0.168559746721744	0.289381611355621	456.333069048748	-0.095411771603849	0.37936718217051	0.519823713302568	456.333069048748	-0.193589309197118	0.0780532306404621	0.309124226171752	456.333069048748	-0.191319404789221	0.0821021502979238	0.220811049499803	456.333069048748	-0.194015567896594	0.0770921054421266	0.169620302958871	456.333069048748	0.113068655526811	0.298943260212426	0.445266637511208	456.333069048748	-0.020290131793688	0.853840498701692	0.998625307316004	456.333069048748	0.0107009487593112
ENSG00000126106.9	TMEM53	chr1	45100910	45140227	-	39317	1444	67	54	53.4814814814815	FALSE	52.911122107816	0.425320030145381	0.0626317939988101	0.260928855680393	52.911122107816	0.326679359160985	0.159706550381497	0.380639808209044	52.911122107816	0.407065867296457	0.0781991702536458	0.161683243428051	52.911122107816	0.0650839571855908	0.781593513365621	0.856795897674217	52.911122107816	0.334016464411643	0.15167793344591	0.437638839242613	52.911122107816	0.429411928974197	0.0639401990686535	0.18763956701587	52.911122107816	0.381506676290332	0.0991967654614544	0.20489596882624	52.911122107816	0.539769768021203	0.0194144650160992	0.0555610100267495	52.911122107816	-0.0913035657337377	0.680799154846219	NA	52.911122107816	0.102732569813213
ENSG00000142945.8	KIF2C	chr1	45205490	45233439	+	27949	7218	490	252	267.333333333333	FALSE	262.7118199865	-0.121728568954662	0.440460329327896	0.697421983812916	262.7118199865	-0.390449615685517	0.0145217521606739	0.084672106102197	262.7118199865	-0.671756609642357	3.20258888568434e-05	0.000259892281627316	262.7118199865	-1.18927042904474	4.4704210901574e-13	1.43689092165344e-11	262.7118199865	-0.0363584307691433	0.818123608744612	0.93298849939741	262.7118199865	-0.330821836128315	0.0384177338095068	0.133736782756393	262.7118199865	-0.476291880458414	0.00296592168608312	0.0131644256256417	262.7118199865	-1.00292723673796	1.23759421106568e-09	3.05479504431378e-08	262.7118199865	0.085370138185519	0.589332672193617	0.998625307316004	262.7118199865	0.0596277795572018
ENSG00000142937.7	RPS8	chr1	45240923	45244451	+	3528	134038	7540	5043	4964.37037037037	FALSE	4876.62412281503	-0.242564175911021	0.00337931383993971	0.050946274182577	4876.62412281503	-0.384250855511468	3.58216079186769e-06	0.000166654873280295	4876.62412281503	-0.310496983090616	0.000179170010414041	0.00113317061390688	4876.62412281503	-0.760358431234607	5.46820810377478e-20	4.49912011205025e-18	4876.62412281503	-0.33015209096768	6.81307862201361e-05	0.00390587204098148	4876.62412281503	-0.250722032083096	0.00248281807128912	0.0203339367571199	4876.62412281503	-0.288720363199662	0.000493466737373709	0.00296080042424226	4876.62412281503	-0.462116786634146	2.62909175082062e-08	4.90800615499833e-07	4876.62412281503	-0.0875879150566595	0.291065530629582	0.998625307316004	4876.62412281503	0.133528823428372
ENSG00000173846.8	PLK3	chr1	45265897	45271662	+	5765	1422	106	48	52.6666666666667	FALSE	51.5658672162353	-0.413585839695275	0.0773016075018875	0.287993129471835	51.5658672162353	-0.240456117528354	0.30145931337434	0.55175436841285	51.5658672162353	-0.322806699328598	0.169746128609011	0.290684929431426	51.5658672162353	0.712788032618468	0.000870623817765322	0.00390922852181033	51.5658672162353	-0.151791494119909	0.512259728049267	0.774271124926993	51.5658672162353	-0.165023757677993	0.478218263372	0.673202628680999	51.5658672162353	-0.492944084936723	0.0392348440530756	0.100996762530599	51.5658672162353	0.525159840745881	0.0172657405385062	0.0507017086666114	51.5658672162353	0.261794345575366	0.271837013720457	NA	51.5658672162353	0.0754323598503611
ENSG00000070785.12	EIF2B3	chr1	45316450	45452282	-	135832	1685	97	63	62.4074074074074	FALSE	61.5810727481731	-0.284108019557117	0.197054953268437	0.473507386355688	61.5810727481731	-0.299714358396347	0.178261276215535	0.406896101759866	61.5810727481731	0.268642876044995	0.208833169804124	0.339186903103536	61.5810727481731	-0.0654671019378274	0.762078757838766	0.844368060119112	61.5810727481731	-0.0807065922242076	0.712995356945431	0.888010863662121	61.5810727481731	-0.202811283241198	0.361385083787695	0.573645561725163	61.5810727481731	-0.760961404909595	0.00107906929529102	0.0056838232115922	61.5810727481731	-0.356497785772576	0.115587295201325	0.220693748422642	61.5810727481731	0.20340142733291	0.360176100012156	0.998625307316004	61.5810727481731	0.0969030751551488
ENSG00000126088.8	UROD	chr1	45477819	45481247	+	3428	5482	284	196	203.037037037037	FALSE	200.059366481778	-0.0423992341642	0.772915064344468	0.89596157395811	200.059366481778	-0.213432669482657	0.15316862032543	0.37156875790657	200.059366481778	0.268354280801488	0.0653701111943758	0.140750862145196	200.059366481778	-0.00314181057556212	0.982881007332064	0.989304686831695	200.059366481778	-0.173950596292437	0.244203343980554	0.551239657618928	200.059366481778	0.183608101010031	0.210613892493498	0.406886874841813	200.059366481778	0.000948990527233481	0.994870755275228	0.996665336119016	200.059366481778	-0.00334431287380168	0.982057979480653	0.98897191957612	200.059366481778	-0.131551362128237	0.37678532216887	0.998625307316004	200.059366481778	0.397040770492688
ENSG00000132773.7	TOE1	chr1	45805342	45809647	+	4305	1737	92	68	64.3333333333333	FALSE	63.2482355213076	-0.264117260867326	0.175948640519689	0.448373851350146	63.2482355213076	-0.635061262381431	0.00198274074377938	0.0208751590630611	63.2482355213076	-0.336042107036224	0.0914448798086765	0.182889759617353	63.2482355213076	-0.191392950068713	0.322348743460534	0.460809352379393	63.2482355213076	0.00586354238830841	0.975780668064424	0.989874830660025	63.2482355213076	-0.233547815649166	0.238615447413029	0.440360719774076	63.2482355213076	-0.429666227201	0.0323374630031922	0.0865514145320379	63.2482355213076	-0.0851399187278711	0.664887015566639	0.776269349668263	63.2482355213076	0.269980803255634	0.168028101905425	0.985126099538007	63.2482355213076	0.401513446732265
ENSG00000117450.9	PRDX1	chr1	45976708	45988719	-	12011	138045	8320	5134	5112.77777777778	FALSE	4997.05981408373	-0.282820703968799	0.0168140440216395	0.127696992136104	4997.05981408373	-0.0544801525414906	0.645038617122899	0.820755932337661	4997.05981408373	-0.150783370000772	0.20245244421119	0.332039944492549	4997.05981408373	-0.584196861579251	8.06692805553925e-07	8.1923111658882e-06	4997.05981408373	-0.229251246897919	0.0527113651041886	0.252131230173665	4997.05981408373	-0.348134685684987	0.00327936071754078	0.024906324218861	4997.05981408373	-0.388468699875737	0.00103426085238925	0.00550161565713937	4997.05981408373	-0.854975924888967	5.91620102908502e-13	2.69596729971536e-11	4997.05981408373	0.0535694570708794	0.650936637167811	0.998625307316004	4997.05981408373	-0.293654533143496
ENSG00000117448.9	AKR1A1	chr1	46016215	46035721	+	19506	2734	143	101	101.259259259259	FALSE	99.0460086050779	0.377146614913653	0.0383907763727433	0.202938988012015	99.0460086050779	0.0552011675521101	0.768347554476805	0.885313325866297	99.0460086050779	0.300274714110909	0.103572163906242	0.200991973896236	99.0460086050779	0.257465987025146	0.159740691574734	0.274662931047419	99.0460086050779	0.113758928586935	0.543237092481774	0.794340102648189	99.0460086050779	0.0373772958484833	0.842970055322775	0.917744659593014	99.0460086050779	0.0835248187247397	0.655330259134109	0.775120155976326	99.0460086050779	0.0927111120532299	0.623386340564497	0.743206971947814	99.0460086050779	-0.263387686326718	0.146008840040511	0.975431061423351	99.0460086050779	-0.0178238717036268
ENSG00000132780.12	NASP	chr1	46049518	46084566	+	35048	34907	1766	1311	1292.85185185185	FALSE	1271.63258880054	-0.0885154626202863	0.333203623339275	0.612124746122141	1271.63258880054	-0.37334862736895	5.25240967509485e-05	0.00140512363266929	1271.63258880054	-0.226470719398311	0.0138336142804219	0.0411893506407271	1271.63258880054	-0.210243439974098	0.0217816733021888	0.0576631551373822	1271.63258880054	-0.070111859042687	0.44465600805805	0.727108988277453	1271.63258880054	-0.0767405073853724	0.403258265723122	0.610036252845704	1271.63258880054	-0.362427747588799	8.6394049733869e-05	0.000703019712394835	1271.63258880054	-0.244766675002123	0.00801110093639721	0.0273479227509895	1271.63258880054	0.0184036035775992	0.840910979881949	0.998625307316004	1271.63258880054	0.296608119983578
ENSG00000159592.6	GPBP1L1	chr1	46092976	46153785	-	60809	10055	608	363	372.407407407407	FALSE	367.7799933357	-0.0504598302117449	0.60996368732776	0.805249936947627	367.7799933357	-0.154835106550734	0.123378260504152	0.326526303823884	367.7799933357	-0.0921651406647573	0.357343410913804	0.502208800842203	367.7799933357	-0.0904278195071176	0.361024210871713	0.501024697455262	367.7799933357	0.190045845126595	0.053359212628719	0.253691794231566	367.7799933357	0.128446346376911	0.194448886068532	0.385858151318663	367.7799933357	0.365553054804762	0.000168740554701424	0.00122402332169539	367.7799933357	0.321376827076869	0.00106025000256154	0.00518513017213089	367.7799933357	0.24050567533834	0.0140897074149179	0.631997533913881	367.7799933357	0.283281452927645
ENSG00000159596.6	TMEM69	chr1	46152886	46160115	+	7229	1750	93	62	64.8148148148148	FALSE	64.1159143185347	0.129170910373835	0.506130554308049	0.742691504734181	64.1159143185347	0.340668869154609	0.0768453970120318	0.245452263784657	64.1159143185347	0.0123106402779758	0.950707159070134	0.971969870484938	64.1159143185347	0.232860666315916	0.225181284323825	0.353972244297933	64.1159143185347	0.241120477389599	0.216448461876173	0.519546470078788	64.1159143185347	0.162387027735829	0.410325983374177	0.615488975061265	64.1159143185347	-0.0591443454061024	0.767792683429568	0.856637482142987	64.1159143185347	0.419388686088077	0.0303060281352427	0.078414644041762	64.1159143185347	0.111949567015765	0.556482853518593	0.998625307316004	64.1159143185347	-0.178281841418779
ENSG00000086015.16	MAST2	chr1	46252659	46501796	+	249137	3049	205	114	112.925925925926	FALSE	111.165347659197	-0.195404508860884	0.242376184465292	0.525177950538548	111.165347659197	-0.217190104226204	0.198120310317925	0.432767226520423	111.165347659197	-0.288893127430172	0.088907126481046	0.178667503110734	111.165347659197	-0.725739795482845	2.92503924115295e-05	0.000207935189575081	111.165347659197	-0.350096618031461	0.0405228895330508	0.218764517855826	111.165347659197	-0.172029305811809	0.30895664320686	0.520650243037391	111.165347659197	-0.315685660391959	0.0634149166832213	0.146137175738357	111.165347659197	-0.533610449040636	0.00229694318452348	0.0098128063161902	111.165347659197	-0.154692109170577	0.367921479991366	0.998625307316004	111.165347659197	0.0451607984143954
ENSG00000117461.10	PIK3R3	chr1	46505812	46642160	-	136348	6127	427	204	226.925925925926	FALSE	223.581156777099	0.410476104358549	0.00672038468524938	0.076239079468931	223.581156777099	0.496163547684017	0.0010753129695091	0.0134960890495168	223.581156777099	1.31883178491919	2.4385618554038e-19	2.28095375232823e-17	223.581156777099	0.568835905657224	0.000150387989064975	0.000861048756978972	223.581156777099	0.398311748469208	0.00915342908392648	0.0917044518600788	223.581156777099	0.740464027169465	8.52002583794277e-07	4.50648509499759e-05	223.581156777099	1.12437026229926	2.64146281688016e-14	1.59673731910184e-12	223.581156777099	0.617733813572443	4.71806989890061e-05	0.00036970695874454	223.581156777099	-0.0121643558893412	0.934448660169463	0.998625307316004	223.581156777099	0.244300479485447
ENSG00000085998.9	POMGNT1	chr1	46654354	46685977	-	31623	1182	73	42	43.7777777777778	FALSE	43.0306396831433	-0.246517850967789	0.290317044811616	0.574428247649971	43.0306396831433	-0.164238324466322	0.482473819738658	0.70969415033897	43.0306396831433	-0.400449398266038	0.0955987279744502	0.188859559088698	43.0306396831433	-0.400531499204967	0.0899058615722442	0.176178787941342	43.0306396831433	-0.20836392683576	0.377139657579294	0.67742434980608	43.0306396831433	-0.0970993213700617	0.678230273546584	0.818754664761243	43.0306396831433	0.0607508413103069	0.790813775667519	0.87272369729031	43.0306396831433	-0.14585244317339	0.537972821644317	0.673788239257875	43.0306396831433	0.0381539241320291	0.873121459639858	NA	43.0306396831433	0.0671390030962599
ENSG00000085999.7	RAD54L	chr1	46713360	46744145	+	30785	1537	107	56	56.9259259259259	FALSE	56.1151724223662	-0.154404418226145	0.572393749454535	0.783108677082832	56.1151724223662	-0.292685740201424	0.290943496306681	0.540749614762846	56.1151724223662	-0.795638343131892	0.00545873665167813	0.0195826943426774	56.1151724223662	-0.810259363683777	0.00425304254372079	0.0150687942757189	56.1151724223662	0.0968361431296433	0.722137681884735	0.892512886283375	56.1151724223662	-0.0965834943163055	0.725717334143055	0.847187633321657	56.1151724223662	-0.395751644605234	0.155881489334526	0.28927865318972	56.1151724223662	-0.709412250636638	0.0134653056842924	0.0415028464483601	56.1151724223662	0.251240561355788	0.3571869729238	0.998625307316004	56.1151724223662	0.196102245885119
ENSG00000132128.12	LRRC41	chr1	46726868	46769280	-	42412	4248	230	158	157.333333333333	FALSE	154.662839209248	0.0278466493872127	0.854556034341062	0.932108466536745	154.662839209248	0.196112009757774	0.195513234372628	0.429819544936955	154.662839209248	-0.386720894285587	0.0141742902135261	0.0419419264297753	154.662839209248	-0.0319406621760206	0.833775152069378	0.890388895720285	154.662839209248	0.0708266604714227	0.643286816010198	0.850501680161104	154.662839209248	-0.136167879808024	0.380939894943696	0.591892272507376	154.662839209248	-0.295983695630769	0.0585637712650721	0.137963327534844	154.662839209248	-0.0535678735528444	0.729972274604653	0.824105403650991	154.662839209248	0.0429800110842101	0.776883707254131	0.998625307316004	154.662839209248	-0.332279889565798
ENSG00000173660.7	UQCRH	chr1	46769303	46782448	+	13145	45339	2655	1640	1679.22222222222	FALSE	1648.2852123548	-0.198393057035245	0.0609336345732557	0.256817332412127	1648.2852123548	-0.181379865956368	0.0871212891162508	0.26676766887905	1648.2852123548	-0.18555636477253	0.0801190501190979	0.164571863004693	1648.2852123548	-0.310662788250555	0.00337494410752884	0.0124284100039375	1648.2852123548	-0.274573263623932	0.00972121614383643	0.095450526689647	1648.2852123548	-0.192569871886495	0.0695999810657543	0.198573933402795	1648.2852123548	-0.130260423080896	0.218967104777163	0.364644245324188	1648.2852123548	0.041940860264969	0.69202750456181	0.796548757193814	1648.2852123548	-0.0761802065886876	0.473593485451314	0.998625307316004	1648.2852123548	-0.0111900059301268
ENSG00000117481.6	NSUN4	chr1	46805849	46830824	+	24975	1409	80	52	52.1851851851852	FALSE	51.173784647214	-0.196715994030411	0.368331318338341	0.642519060611405	51.173784647214	-0.517383296176839	0.0236571245512593	0.115992732589038	51.173784647214	-0.419594557220547	0.0641360454619151	0.138613412807832	51.173784647214	-0.0842781147883118	0.696349269271592	0.795137446253838	51.173784647214	0.125441123590332	0.560412805377232	0.804365722594424	51.173784647214	-0.0868510781643638	0.693414479680291	0.827626738272541	51.173784647214	-0.312256123452406	0.162800518900464	0.29738559893751	51.173784647214	0.0516324830076511	0.813425227407906	0.883101516557739	51.173784647214	0.322157117620744	0.138034617487767	NA	51.173784647214	0.430532218012475
ENSG00000079277.15	MKNK1	chr1	47023090	47082515	-	59425	2873	145	111	106.407407407407	FALSE	105.120209368999	0.130676668845926	0.479807925078593	0.72374192888114	105.120209368999	0.138928708793327	0.455754340673181	0.689366002803304	105.120209368999	0.534986340401408	0.00329410103471507	0.0130199535685481	105.120209368999	-0.187273120348548	0.320814604936826	0.459355233559239	105.120209368999	0.104432325369005	0.576866233450885	0.813213845713657	105.120209368999	0.329232484041036	0.0748872457059948	0.208343163852057	105.120209368999	0.408449711082088	0.025840617845576	0.0726185104920267	105.120209368999	-0.110501153181575	0.564236421838285	0.694528999093365	105.120209368999	-0.0262443434769216	0.886671627972359	0.998625307316004	105.120209368999	0.19030377524771
ENSG00000142961.10	MOB3C	chr1	47073387	47082563	-	9176	3893	196	142	144.185185185185	FALSE	141.158720866858	0.124334446510845	0.458233925966515	0.709131123375552	141.158720866858	0.0572213599067331	0.735519381305443	0.869125694452149	141.158720866858	0.139252204137038	0.40914805980269	0.554926617342632	141.158720866858	0.108978201468708	0.515323587257671	0.647781213236902	141.158720866858	0.24874309132251	0.138470130378714	0.416394442824113	141.158720866858	0.172155001386613	0.30822976086469	0.520214559362514	141.158720866858	-0.178587780184577	0.299161037295445	0.45210000760329	141.158720866858	-0.172299311533838	0.320581341036754	0.468071935006999	141.158720866858	0.124408644811664	0.452566770876618	0.998625307316004	141.158720866858	0.11493364147988
ENSG00000123472.8	ATPAF1	chr1	47098409	47139539	-	41130	4463	229	155	165.296296296296	FALSE	161.904565952705	-0.0258975169517977	0.866242390356089	0.938153353550366	161.904565952705	0.00459768937198829	0.976273116024999	0.988762339055701	161.904565952705	0.11471821103155	0.455395076638371	0.599502318667936	161.904565952705	0.0148875130561162	0.922562344415044	0.950810599915574	161.904565952705	-0.0302410040664265	0.845571738175908	0.944769327980777	161.904565952705	-0.0554424475433128	0.722080009231793	0.845041875679404	161.904565952705	0.0197818217321562	0.89812859207732	0.942796298783115	161.904565952705	-0.0453434143049989	0.771916110728813	0.854061857746598	161.904565952705	-0.00434348711462881	0.977570901536731	0.998726332951763	161.904565952705	-0.0600401369153011
ENSG00000159658.6	EFCAB14	chr1	47124366	47184824	-	60458	9565	528	343	354.259259259259	FALSE	348.178479272616	0.112832989677506	0.262559098856356	0.546137676132392	348.178479272616	0.277666650333146	0.0056788496662264	0.0443040018736504	348.178479272616	0.0755325149031679	0.458794594930096	0.602282282545255	348.178479272616	0.426823693695882	1.48934381702101e-05	0.000113210514611195	348.178479272616	0.157907501716322	0.119791523256266	0.388775557215186	348.178479272616	0.251637581758629	0.0127876699836413	0.0643544075555504	348.178479272616	0.477652653161153	1.46111919698595e-06	2.00932586671564e-05	348.178479272616	0.52901940433116	1.09726324260313e-07	1.75781959057786e-06	348.178479272616	0.0450745120388155	0.651639096456354	0.998625307316004	348.178479272616	-0.0260290685745167
ENSG00000123473.11	STIL	chr1	47715811	47779819	-	64008	9573	586	361	354.555555555556	TRUE	349.399035700739	0.191106180756414	0.26269713682772	0.546208977000642	349.399035700739	-0.0147105544963146	0.931806059619376	0.969127707406043	349.399035700739	-0.112992515740463	0.512125172199174	0.64904139371505	349.399035700739	-0.315764554625585	0.0672611039295935	0.140730437842799	349.399035700739	0.293138810577864	0.0861312544621449	0.324443546905731	349.399035700739	0.289888777965259	0.0899480051684787	0.235119791453619	349.399035700739	0.305912100991522	0.0731308339898215	0.162795613020607	349.399035700739	-0.039695359546026	0.818081507465002	0.886196790848958	349.399035700739	0.10203262982145	0.547559205184064	0.998625307316004	349.399035700739	0.304599332461574
ENSG00000162368.9	CMPK1	chr1	47799469	47844511	+	45042	6835	478	249	253.148148148148	FALSE	249.850202273096	0.309532972339091	0.106520027104728	0.339260559445383	249.850202273096	0.374103662032847	0.0514491311217244	0.191352688932483	249.850202273096	0.0354488181474135	0.854950796507819	0.909395831669677	249.850202273096	0.0854001559060797	0.657689716426296	0.764451382624469	249.850202273096	0.29748489956164	0.122418396338696	0.393915064720473	249.850202273096	0.361038552297459	0.0606572741823636	0.181237571749994	249.850202273096	0.78431980504409	3.80140539250176e-05	0.000344686615487455	249.850202273096	0.279028237634114	0.148666674460248	0.265965788051896	249.850202273096	-0.0120480727774507	0.949531535124814	0.998625307316004	249.850202273096	-0.0130651097353889
ENSG00000185104.15	FAF1	chr1	50905150	51425935	-	520785	4128	204	155	152.888888888889	FALSE	150.184625832847	-0.180997727027675	0.178061296146294	0.450527527777895	150.184625832847	-0.116837880556326	0.386696039782328	0.630491928349681	150.184625832847	-0.138109405502506	0.307711326272731	0.451506414342716	150.184625832847	-0.238874803324631	0.0762425974465131	0.154774068862211	150.184625832847	-0.208127092280881	0.127343101815721	0.400697876322413	150.184625832847	-0.184319147472916	0.177331621605943	0.363969839743693	150.184625832847	-0.206542633877096	0.129046708549963	0.251032252030401	150.184625832847	-0.299307632179805	0.0312454736863923	0.0804541521811886	150.184625832847	-0.0271293652532058	0.843324235278436	0.998625307316004	150.184625832847	-0.0674812669165894
ENSG00000123080.6	CDKN2C	chr1	51426417	51440305	+	13888	3121	175	126	115.592592592593	TRUE	113.659940853251	-0.0473961014863316	0.78875109313108	0.903201316180771	113.659940853251	-0.19180733897939	0.28531033840134	0.535092373793648	113.659940853251	-0.216006765791242	0.22987754468432	0.363727183416109	113.659940853251	-1.70092283197793	4.20051843937013e-17	2.42375369170409e-15	113.659940853251	-0.0526441611018266	0.76795764657702	0.911374330073885	113.659940853251	-0.405660893973234	0.0265101998877487	0.104144410108678	113.659940853251	-0.0379235160527442	0.831312480092057	0.8985576813159	113.659940853251	-0.975627905586506	4.15238609890266e-07	5.7295190799455e-06	113.659940853251	-0.00524805961549502	0.976458858830418	0.998726332951763	113.659940853251	-0.213853554993844
ENSG00000123091.4	RNF11	chr1	51701943	51739127	+	37184	3319	214	118	122.925925925926	FALSE	120.815513518319	-0.242981073648859	0.118322773049844	0.35924278649946	120.815513518319	-0.0468251563613239	0.761845590760411	0.882474785499847	120.815513518319	0.067000272863882	0.662027063592973	0.771308835333311	120.815513518319	-0.0703287692570242	0.645785610746324	0.755081542973395	120.815513518319	-0.311349753684044	0.0499592202006212	0.247594886058405	120.815513518319	-0.0986396862337855	0.527692363107592	0.710696325555889	120.815513518319	0.317191214748675	0.034913214568647	0.0921136652782059	120.815513518319	0.0789692057787264	0.609628015583308	0.731948999658597	120.815513518319	-0.0683686800351843	0.670180062709521	0.998625307316004	120.815513518319	-0.0518145298724616
ENSG00000085832.12	EPS15	chr1	51819935	51985000	-	165065	2982	147	111	110.444444444444	TRUE	108.544291818775	-0.0598659679892816	0.717799038838825	0.86983114920703	108.544291818775	-0.075114743529798	0.653533715752052	0.825239029699551	108.544291818775	-0.277210248889139	0.103870444052776	0.201394886723318	108.544291818775	0.000826731526323977	0.995992338836161	0.997676465212279	108.544291818775	-0.240311649229882	0.158073620945871	0.446911293580977	108.544291818775	0.0638174886160933	0.701474839449461	0.83314766953477	108.544291818775	0.0305769028793158	0.853913034971966	0.9153041289217	108.544291818775	0.0929350469964497	0.577703214948772	0.70529079615231	108.544291818775	-0.180445681240601	0.287477840235066	0.998625307316004	108.544291818775	0.138932232145891
ENSG00000117859.14	OSBPL9	chr1	52042851	52254889	+	212038	6001	305	220	222.259259259259	FALSE	218.644499668332	0.0462396475252873	0.715141112428495	0.868976409503879	218.644499668332	0.0504267443668527	0.692803643151398	0.846336702370542	218.644499668332	0.0266820031587425	0.834828502923476	0.89484753642678	218.644499668332	0.00146652260195417	0.990774746039055	0.994243296815702	218.644499668332	0.0688052173148636	0.590301334272178	0.819271479198795	218.644499668332	0.0664667341848671	0.603918655234575	0.769820853595529	218.644499668332	0.0140630304787278	0.9125259622346	0.950812539161136	218.644499668332	0.143049786057609	0.263752539213984	0.406469834106047	218.644499668332	0.0225655697895763	0.85841751445543	0.998625307316004	218.644499668332	0.0160399898180144
ENSG00000078618.15	NRD1	chr1	52254863	52344477	-	89614	4632	233	168	171.555555555556	FALSE	168.705926833951	-0.0341813291875618	0.792998767320735	0.90543302991989	168.705926833951	0.031334951385669	0.810658596268964	0.909304757188339	168.705926833951	0.354638454173553	0.00550826184985343	0.0197205539072512	168.705926833951	-0.020840780706308	0.872473773683615	0.917235802557709	168.705926833951	-0.178787406916057	0.181160437339061	0.480248104473418	168.705926833951	0.00788680581186654	0.952309073429347	0.975134642370728	168.705926833951	0.0653327543833684	0.616603191771689	0.744843623437812	168.705926833951	0.0358013118157756	0.786676918510749	0.863123832936297	168.705926833951	-0.144606077728495	0.276643476816561	0.998625307316004	168.705926833951	-0.0234481455738025
ENSG00000169213.6	RAB3B	chr1	52373628	52456436	-	82808	1197	118	39	44.3333333333333	FALSE	43.5009556808083	-0.587020586707324	0.032125888149148	0.187224944171946	43.5009556808083	0.164075726522243	0.519691489869738	0.73804995668571	43.5009556808083	0.924424762686194	0.000118176534377372	0.000798567820895307	43.5009556808083	0.356498515945166	0.149623048807931	0.260653830361103	43.5009556808083	-0.325930739496173	0.227847949481139	0.533148265840541	43.5009556808083	0.235822323776911	0.354972447181463	0.56706423460804	43.5009556808083	1.30502687072325	2.70669895782016e-08	5.69946135999763e-07	43.5009556808083	0.302348827775081	0.23558922593032	0.374431382868328	43.5009556808083	0.261089847211152	0.359062618693831	NA	43.5009556808083	0.0717465972546674
ENSG00000117862.7	TXNDC12	chr1	52485803	52521843	-	36040	3920	226	141	145.185185185185	FALSE	142.753936522453	-0.187543059936571	0.174820091813873	0.447398764077126	142.753936522453	0.00718859566777523	0.958224883442033	0.981531563604139	142.753936522453	-0.0599135846546741	0.664782685958762	0.773606462471131	142.753936522453	0.0186450937009745	0.89053229595347	0.929878963788782	142.753936522453	-0.0385107726541544	0.780652896087137	0.916932034829134	142.753936522453	-0.0515380730203776	0.710593975455255	0.837889870739835	142.753936522453	0.141204284722197	0.298284626627285	0.451235477053125	142.753936522453	0.087551349207585	0.525634465515076	0.663464184739626	142.753936522453	0.149032287282417	0.284559753958223	0.998625307316004	142.753936522453	-0.0587266686881529
ENSG00000198841.3	KTI12	chr1	52497775	52499488	-	1713	1951	120	74	72.2592592592593	FALSE	70.7074034542772	0.0133133005223921	0.957314271949247	0.981277496890185	70.7074034542772	-0.228331109858301	0.367228975244188	0.612567449531319	70.7074034542772	-0.658780652724113	0.0113687479832444	0.0353226204822063	70.7074034542772	0.0351266679026207	0.887453559330768	0.92808194988975	70.7074034542772	-0.155676314549424	0.537839885973499	0.790623863892464	70.7074034542772	-0.310090988367743	0.224727972998699	0.423707355838413	70.7074034542772	-0.199710695583987	0.429800507269275	0.58086803157335	70.7074034542772	-0.210498410620423	0.408822209479131	0.558032896072437	70.7074034542772	-0.168989615071816	0.501266922659757	0.998625307316004	70.7074034542772	-0.0817598785094417
ENSG00000134717.13	BTF3L4	chr1	52521797	52556388	+	34591	9835	631	355	364.259259259259	FALSE	359.232374839098	0.205042746737771	0.361841318794021	0.637202132145001	359.232374839098	0.481748750551093	0.0317971247484483	0.140992639977401	359.232374839098	0.216481884322302	0.336620291919977	0.481908798775724	359.232374839098	0.948276765024125	2.08154144711345e-05	0.00015324421954474	359.232374839098	0.520950620137933	0.0202261332844834	0.146598222158172	359.232374839098	0.352377637851217	0.117354876864443	0.277298658310427	359.232374839098	0.63720498933654	0.00443878642751409	0.018320044679466	359.232374839098	1.04947232129803	2.57642471320166e-06	2.90534390882106e-05	359.232374839098	0.315907873400161	0.156822183460584	0.97847337410396	359.232374839098	-0.129371112699876
ENSG00000157077.10	ZFYVE9	chr1	52608046	52812358	+	204312	747	50	25	27.6666666666667	FALSE	27.3948479165455	-0.113563168360572	0.724035235390583	0.873151925329679	27.3948479165455	-0.0249251026386288	0.938379030361266	0.971807290747922	27.3948479165455	0.365764114611386	0.240457964315588	0.376579039638406	27.3948479165455	0.670976507175704	0.0258567147369778	0.0659858607561128	27.3948479165455	-0.178881010242269	0.586848103151879	0.818639284867755	27.3948479165455	0.298143388366552	0.343845158566433	0.556135434841886	27.3948479165455	0.235371034629814	0.454589113246659	0.605465705482246	27.3948479165455	0.653127840476406	0.0336726280930683	0.0851009593956215	27.3948479165455	-0.0653178418816967	0.842803331692284	NA	27.3948479165455	0.32306849100518
ENSG00000154222.10	CC2D1B	chr1	52811395	52831865	-	20470	4800	338	188	177.777777777778	FALSE	174.494204489559	0.08922124747289	0.88108953011231	0.943978968480587	174.494204489559	0.3394150540291	0.569172551106376	0.7719272419309	174.494204489559	-1.45981670855605	0.0154124167270501	0.0446980205732922	174.494204489559	-0.319746172116206	0.592421809704569	0.712831442252511	174.494204489559	0.275317062983586	0.644338188476878	0.850880022506467	174.494204489559	-0.351275803586073	0.556915379008322	0.732536744796027	174.494204489559	0.135632529969136	0.820169437081127	0.891719762376471	174.494204489559	0.224548165729871	0.706672967353134	0.807123447704121	174.494204489559	0.186095815510696	0.754843420031978	0.998625307316004	174.494204489559	-0.690690857615172
ENSG00000085840.8	ORC1	chr1	52838501	52870131	-	31630	768	50	28	28.4444444444444	FALSE	27.8023397211141	-0.254405848040458	0.321377969877942	0.602990844665413	27.8023397211141	-0.612541209984614	0.0232029541527417	0.11512085460707	27.8023397211141	-1.119164157381	0.000111381737123996	0.00076486716853464	27.8023397211141	-1.03227124976065	0.000223941298679726	0.0012170901407144	27.8023397211141	-0.281728544516431	0.280934871993979	0.591418333706994	27.8023397211141	-0.544431439954872	0.0438435663020262	0.145146301386777	27.8023397211141	-1.01214170842833	0.000370789255635524	0.00235345237541233	27.8023397211141	-0.736855048042639	0.00829869544779109	0.0281996970359738	27.8023397211141	-0.027322696475973	0.917764223024445	NA	27.8023397211141	0.0681097700297425
ENSG00000134748.12	PRPF38A	chr1	52870236	52886511	+	16275	8234	460	315	304.962962962963	FALSE	298.346568382084	-0.364863408587452	0.00591103328631119	0.0708845368180313	298.346568382084	-0.189319341284202	0.152365270225417	0.370431952128948	298.346568382084	-0.401751979042719	0.00262432753278906	0.0109067241822135	298.346568382084	-0.570071622011318	1.97458196288051e-05	0.000146537966857008	298.346568382084	-0.277374182416149	0.036919303424155	0.208278901988686	298.346568382084	-0.618249784972604	4.94421414172095e-06	0.000176022426565662	298.346568382084	-0.576030929121836	1.88570348701782e-05	0.000193491468656355	298.346568382084	-0.62401227785404	4.37493263702014e-06	4.66134909023513e-05	298.346568382084	0.0874892261713024	0.514414399782717	0.998625307316004	298.346568382084	-0.428930443688402
ENSG00000134744.9	ZCCHC11	chr1	52873954	53019159	-	145205	1429	75	52	52.9259259259259	FALSE	51.9227701138758	0.192798648987765	0.354886972169383	0.629697610762207	51.9227701138758	-0.024454634986457	0.909255367338063	0.957757609550264	51.9227701138758	-0.10209780317809	0.637333921027601	0.751506000829521	51.9227701138758	-0.479797175694541	0.0304269636948493	0.0751665274930304	51.9227701138758	-0.117353015922775	0.589388924256687	0.819271479198795	51.9227701138758	0.0813085894765165	0.703897701038952	0.833977996190951	51.9227701138758	-0.119231501809655	0.582053916428077	0.716460881199598	51.9227701138758	-0.223677527956005	0.314254032811076	0.461792845304981	51.9227701138758	-0.31015166491054	0.143436294304898	NA	51.9227701138758	0.105763224462974
ENSG00000162377.4	SELRC1	chr1	53152508	53164038	-	11530	875	50	32	32.4074074074074	FALSE	31.7843189608101	0.237813783516721	0.406930684194415	0.673367981331764	31.7843189608101	0.128022448221953	0.660762481929831	0.829221132918166	31.7843189608101	-0.13497542249744	0.651504063706189	0.762182100606832	31.7843189608101	0.0535529702792318	0.85355682758241	0.904610402596436	31.7843189608101	-0.405306542618723	0.187851433763734	0.48933461388801	31.7843189608101	-0.0848536016987311	0.776597075942421	0.878640389206055	31.7843189608101	0.037831194672593	0.897616340121437	0.942481247585855	31.7843189608101	0.0598640193523972	0.840178717328282	0.900856049041505	31.7843189608101	-0.643120326135443	0.0321834519576647	NA	31.7843189608101	-0.212876049920684
ENSG00000162378.8	ZYG11B	chr1	53192126	53293014	+	100888	1886	99	66	69.8518518518518	FALSE	68.6547974372984	0.0481979573543001	0.802078711802083	0.90897480335076	68.6547974372984	0.089745065956845	0.642675118829349	0.819576794764293	68.6547974372984	0.0918085069267982	0.635426560857534	0.749654861893261	68.6547974372984	-0.413276198013344	0.0385492443537035	0.0912732708038927	68.6547974372984	-0.103813160198255	0.598876585849259	0.825212891638107	68.6547974372984	-0.113761263802176	0.565904198647301	0.739394899158934	68.6547974372984	-0.423375263855964	0.0369215533276589	0.0961561907589615	68.6547974372984	-0.183231096251344	0.361376436094697	0.511743587432267	68.6547974372984	-0.152011117552555	0.435481747483703	0.998625307316004	68.6547974372984	-0.203506329759021
ENSG00000121310.12	ECHDC2	chr1	53361656	53392884	-	31228	2361	123	87	87.4444444444444	FALSE	85.9776965647408	-0.251041652457906	0.163761446367795	0.433212222902238	85.9776965647408	-0.453690531624168	0.0144056558518203	0.0844384286934531	85.9776965647408	0.0333090103590845	0.851680407320895	0.906894200054341	85.9776965647408	-0.126673258815175	0.477065041273893	0.613094424994934	85.9776965647408	-0.175172393256996	0.33439352693298	0.638054730583306	85.9776965647408	-0.387131923715233	0.0369370370385017	0.129989113316486	85.9776965647408	-0.387682387057316	0.0354711757685148	0.0933087234692193	85.9776965647408	-0.157798176880491	0.387860323119016	0.537799624103019	85.9776965647408	0.0758692592009097	0.679155496868931	0.998625307316004	85.9776965647408	0.0665586079089348
ENSG00000116171.12	SCP2	chr1	53392901	53517375	+	124474	3522	180	121	130.444444444444	FALSE	127.887431699903	0.334127736840656	0.0951367501860272	0.318532465016216	127.887431699903	0.402309199981236	0.0449855731375268	0.17621802530455	127.887431699903	0.402705924536761	0.0448526385757195	0.105578952684462	127.887431699903	0.240118192299527	0.231675344838612	0.361106317178724	127.887431699903	0.315116697850445	0.118239360119814	0.386656899209207	127.887431699903	0.168163670014242	0.408573305243575	0.614059228548943	127.887431699903	0.288463673580108	0.152762206099109	0.284938069562696	127.887431699903	0.129922091282876	0.52531479824463	0.663343370356939	127.887431699903	-0.0190110389902111	0.923298286016994	0.998625307316004	127.887431699903	-0.234145529966994
ENSG00000157184.5	CPT2	chr1	53662101	53679869	+	17768	1413	72	51	52.3333333333333	FALSE	51.7528226412877	-0.405975344075633	0.0567886884790322	0.247869595261153	51.7528226412877	-0.209010697679301	0.322214135833666	0.57035753207529	51.7528226412877	-0.149771672135603	0.476227442158099	0.61805714183805	51.7528226412877	-0.264183018680956	0.206844172374459	0.332071782424471	51.7528226412877	-0.471189251731899	0.0312210825836062	0.187833811670904	51.7528226412877	-0.27554104803748	0.198966137530685	0.391846874578383	51.7528226412877	-0.0319969494270611	0.877406222914687	0.930472513382396	51.7528226412877	0.3328361820947	0.101166312391522	0.19897384947124	51.7528226412877	-0.0652139076562658	0.771845732996954	NA	51.7528226412877	-0.0665303503581798
ENSG00000162384.9	C1orf123	chr1	53679771	53686289	-	6518	1942	108	73	71.9259259259259	FALSE	70.596823889972	-0.0551413474613177	0.759281385934904	0.889820415154341	70.596823889972	-0.214833822655077	0.244871289240988	0.490345196963332	70.596823889972	-0.172489994627358	0.349285258712149	0.494227517343337	70.596823889972	-0.43776858281748	0.0188260014245527	0.0513467920990103	70.596823889972	-0.00604959703166333	0.973443360461131	0.989704542455104	70.596823889972	-0.187925230378483	0.311491937328047	0.523235794914371	70.596823889972	0.0119677544946021	0.947223727666011	0.970050758792503	70.596823889972	-0.349173348304517	0.0667022876203868	0.144776875377322	70.596823889972	0.0490917504296544	0.786058600698704	0.998625307316004	70.596823889972	0.0269085922765939
ENSG00000162385.6	MAGOH	chr1	53692564	53704282	-	11718	23575	1314	893	873.148148148148	FALSE	853.71916037761	-0.224271123698402	0.0168279515857954	0.127696992136104	853.71916037761	-0.370680462274298	8.95202581572448e-05	0.00207155472391999	853.71916037761	-0.363177719117309	0.000123978104995962	0.000833966268731354	853.71916037761	-0.108670547870226	0.244883226645642	0.377259423018928	853.71916037761	-0.139728221243101	0.137215727289322	0.414723740887056	853.71916037761	-0.234820766613839	0.0128686959158248	0.06464173652234	853.71916037761	-0.527627573286415	2.97285817808315e-08	6.18660837715384e-07	853.71916037761	-0.396193709244765	3.12200774078393e-05	0.000260489772625409	853.71916037761	0.0845429024553019	0.369990865052965	0.998625307316004	853.71916037761	0.135859695660458
ENSG00000157193.10	LRP8	chr1	53711217	53793742	-	82525	10844	553	394	401.62962962963	FALSE	393.864738952309	-0.0429977105163703	0.750935420162001	0.885729505713367	393.864738952309	0.170545213331247	0.206873634850877	0.442362693946985	393.864738952309	-0.0759929915385157	0.576880577956425	0.703949576451633	393.864738952309	-0.370014855828712	0.00685290346741915	0.0224728849466095	393.864738952309	0.10338903106615	0.445462187260465	0.72791044428034	393.864738952309	0.065620613107104	0.62900826666989	0.78535442709409	393.864738952309	0.0616151482690384	0.649547360465358	0.77133206536084	393.864738952309	-0.222864086450916	0.105190548144553	0.204906327604827	393.864738952309	0.14638674158252	0.278956547786922	0.998625307316004	393.864738952309	-0.104924600224143
ENSG00000058804.10	NDC1	chr1	54231133	54304533	-	73400	6134	350	224	227.185185185185	FALSE	224.201324657426	0.028223591342085	0.816698980219794	0.915502351234148	224.201324657426	-0.19760470457523	0.112131304503716	0.307731755564433	224.201324657426	-0.486624759295035	0.00013012640792486	0.000864849110561189	224.201324657426	-0.847450160317775	5.71476476704056e-11	1.31218087131582e-09	224.201324657426	-0.0277093169261633	0.822183054265901	0.935091013953823	224.201324657426	-0.138193240144727	0.266929163170736	0.474292968948291	224.201324657426	-0.384407714377117	0.00230139379267201	0.0106845272945055	224.201324657426	-0.125416482640892	0.31535378160107	0.46249112119279	224.201324657426	-0.0559329082682482	0.647481115986404	0.998625307316004	224.201324657426	0.0594114644305031
ENSG00000058799.9	YIPF1	chr1	54317392	54356407	-	39015	3249	162	119	120.333333333333	FALSE	118.351169182908	-0.114893760137054	0.430587072459609	0.691468093049993	118.351169182908	-0.34098754332019	0.0235598267800284	0.115664431363167	118.351169182908	-0.194563704815019	0.190607447834524	0.317179359823517	118.351169182908	0.0318818826526774	0.824359540610128	0.884052483449384	118.351169182908	-0.137570428437476	0.353203071336469	0.655779877119905	118.351169182908	-0.275335039009588	0.0677896434640919	0.195157052486476	118.351169182908	-0.24655843843218	0.098482386514953	0.203941851916074	118.351169182908	0.26555229882857	0.0655371380121583	0.142736031464715	118.351169182908	-0.0226766683004219	0.878440999555653	0.998625307316004	118.351169182908	0.0656525043106028
ENSG00000081870.7	HSPB11	chr1	54382247	54411602	-	29355	8725	477	298	323.148148148148	FALSE	318.102735207939	0.347998894650041	0.00753124909829878	0.0816130237652231	318.102735207939	0.212024042595788	0.107022123923202	0.299621484934333	318.102735207939	0.043111630373892	0.745081653406286	0.83157612303742	318.102735207939	0.00341799689153015	0.979321486942362	0.987545475824992	318.102735207939	0.382674471650391	0.00343943908681861	0.0506846695281429	318.102735207939	0.30063316247985	0.0221769987116152	0.0929112732444189	318.102735207939	0.102988036432862	0.436052852616372	0.586996765391468	318.102735207939	0.043523866554662	0.744168321319846	0.833488613712185	318.102735207939	0.0346755770003499	0.786894511897209	0.998625307316004	318.102735207939	0.0886091198840619
ENSG00000116212.10	LRRC42	chr1	54411750	54433841	+	22091	35835	1825	1365	1327.22222222222	FALSE	1300.1821644831	-0.00605420132635215	0.953131622425223	0.979815779369566	1300.1821644831	0.231093907353486	0.0246231731948725	0.118849275942225	1300.1821644831	0.0530280139576678	0.607147268318022	0.726907925932895	1300.1821644831	0.0276295468050203	0.788316441872831	0.861515176790305	1300.1821644831	0.137613202949557	0.181645934019083	0.480775324721839	1300.1821644831	-0.139191836312917	0.179189783124459	0.366209846560244	1300.1821644831	0.0339701958881828	0.741983642516962	0.838517950833744	1300.1821644831	-0.101644122628896	0.32685462647715	0.474735242052297	1300.1821644831	0.143667404275909	0.162414429057948	0.985126099538007	1300.1821644831	-0.370285743666403
ENSG00000116209.7	TMEM59	chr1	54497347	54519177	-	21830	11676	699	439	432.444444444444	FALSE	426.536401813459	0.59603489546036	0.00825121509477389	0.0855343349814813	426.536401813459	0.596208137260493	0.00832918904865717	0.0577325849347641	426.536401813459	0.636068472586752	0.00486205061331083	0.0178825255587252	426.536401813459	0.982893551643488	1.22285342343776e-05	9.48770404653867e-05	426.536401813459	0.488478902965717	0.0309175347237392	0.186639411382573	426.536401813459	0.540333030908728	0.0169566565033515	0.077652409909601	426.536401813459	0.969862244791504	1.64354369251235e-05	0.00017263036940502	426.536401813459	1.19427529361365	1.09083401700571e-07	1.75600562954941e-06	426.536401813459	-0.107555992494644	0.63123675247633	0.998625307316004	426.536401813459	-0.0558751063517653
ENSG00000116221.11	MRPL37	chr1	54649714	54691137	+	41423	10505	552	368	389.074074074074	FALSE	382.661814701297	-0.0486214884585477	0.637707505257436	0.823171947563954	382.661814701297	0.072837437590307	0.480539874535849	0.708719902631249	382.661814701297	0.227173294058076	0.0266169920293726	0.0690968715083275	382.661814701297	-0.212670885696966	0.041002628517367	0.0957302567013461	382.661814701297	-0.167930319754724	0.10967093586137	0.370726568202039	382.661814701297	0.104475798249729	0.31263929550712	0.52397449639311	382.661814701297	0.100613229122507	0.329303762366188	0.485031200461785	382.661814701297	-0.12419939720498	0.238450761327466	0.377329262637135	382.661814701297	-0.119308831296177	0.254127542160043	0.998625307316004	382.661814701297	0.0316383606594224
ENSG00000157216.11	SSBP3	chr1	54691105	54879152	-	188047	1393	97	51	51.5925925925926	FALSE	50.4589891420259	-0.0111019684094143	0.962310198765427	0.983649777703264	50.4589891420259	0.0573080783737762	0.807981510833709	0.907562091425653	50.4589891420259	0.0928781959322208	0.693213908601394	0.795852557084236	50.4589891420259	-0.586724928081772	0.0172222418382265	0.0477196261223825	50.4589891420259	0.0475092667595766	0.840906833635778	0.941688484396663	50.4589891420259	-0.23934323751594	0.325138962278585	0.535705914844855	50.4589891420259	0.236611734903189	0.309601446410091	0.463008808817619	50.4589891420259	-0.716922268731038	0.00539104662741386	0.0198692825927829	50.4589891420259	0.0586112351689909	0.80297813542777	NA	50.4589891420259	-0.296651315889717
ENSG00000116133.7	DHCR24	chr1	55315306	55352891	-	37585	140587	7744	4929	5206.92592592593	FALSE	5121.94982567405	0.266281423789988	0.0383680547536356	0.202938988012015	5121.94982567405	0.482074791651335	0.000176845199901805	0.00346897670270957	5121.94982567405	0.727460365325445	1.49504406528269e-08	2.72232818936517e-07	5121.94982567405	0.264734120836774	0.039492179501806	0.0929855609573525	5121.94982567405	0.289970801939192	0.024178910209857	0.161665760816245	5121.94982567405	0.447234718746265	0.000505043312796545	0.00602391258726188	5121.94982567405	0.506239751252713	8.21290465384275e-05	0.000675588455858893	5121.94982567405	0.0936443531017568	0.467050494884298	0.611404050904813	5121.94982567405	0.0236893781492047	0.853710059891009	0.998625307316004	5121.94982567405	-0.0348400729050696
ENSG00000169174.9	PCSK9	chr1	55505221	55530525	+	25304	3755	280	133	139.074074074074	FALSE	136.934528831134	1.03629487861129	9.17371373039679e-09	3.70534637310481e-06	136.934528831134	1.54951964651774	1.56793697349493e-18	1.26660799513417e-15	136.934528831134	2.17245749228423	1.32788315427054e-36	4.2141320388743e-34	136.934528831134	1.26777025444941	9.57635059729033e-13	2.9343259106042e-11	136.934528831134	1.0644425889588	4.84491245556612e-09	2.15259460400803e-06	136.934528831134	1.58161135512098	3.59739287902726e-19	3.55182590255958e-16	136.934528831134	2.03713245003209	4.24472972661957e-32	1.34709529824077e-29	136.934528831134	0.662834319852202	0.000456820527818024	0.00256431283019012	136.934528831134	0.0281477103475097	0.861186021275316	0.998625307316004	136.934528831134	0.0320917086032426
ENSG00000162402.8	USP24	chr1	55532032	55680786	-	148754	2162	109	78	80.0740740740741	FALSE	78.5408327861835	0.116712107695275	0.509548410033854	0.744060365808713	78.5408327861835	0.0123701583040191	0.94536809276752	0.974314645364437	78.5408327861835	0.0700196919458791	0.697021239732472	0.798684714378847	78.5408327861835	0.0127782861037785	0.942824293930966	0.964422317931457	78.5408327861835	0.0892740754645079	0.61975935716145	0.837156204616873	78.5408327861835	0.249825587065907	0.160061192733764	0.340612930145731	78.5408327861835	0.0729000991242849	0.684750565736855	0.796321623758369	78.5408327861835	0.031435775757823	0.863401294319825	0.91772534704856	78.5408327861835	-0.0274380322307668	0.876269728244144	0.998625307316004	78.5408327861835	0.237455428761888
ENSG00000162407.8	PPAP2B	chr1	56960419	57110974	-	150555	12401	706	436	459.296296296296	FALSE	453.796391473425	0.575063051405971	0.00770758320645212	0.0826093896778187	453.796391473425	0.503638918554386	0.0199308748840156	0.104548851369163	453.796391473425	0.919454994387655	1.95161632426662e-05	0.000167556160941383	453.796391473425	1.15707361167453	6.90736708436239e-08	8.97351811573745e-07	453.796391473425	0.615884909729121	0.00437571104854659	0.0582074376906961	453.796391473425	0.930809074096567	1.55384506890246e-05	0.0004171440266546	453.796391473425	0.740251430899709	0.000601354910955064	0.00350172984190478	453.796391473425	1.13282203831083	1.39142082242336e-07	2.16156738252692e-06	453.796391473425	0.0408218583231495	0.848608152276059	0.998625307316004	453.796391473425	0.427170155542181
ENSG00000162409.6	PRKAA2	chr1	57110995	57181008	+	70013	2288	153	80	84.7407407407407	FALSE	83.3921562967642	0.450168377872188	0.0228261065299253	0.15285062744907	83.3921562967642	0.744499254421667	0.000132259119781487	0.00278496336108601	83.3921562967642	1.35936110534013	3.61995720257317e-13	1.46881003205777e-11	83.3921562967642	1.24433617630548	2.54518222006655e-11	6.2304377982125e-10	83.3921562967642	0.543981508837728	0.00622584404791452	0.0730587730952784	83.3921562967642	0.746976027772141	0.000137665535732788	0.00226117550928199	83.3921562967642	0.895907607302852	3.29623550283246e-06	4.13495015124457e-05	83.3921562967642	1.06712532487957	2.76818216463279e-08	5.14603906170021e-07	83.3921562967642	0.0938131309655406	0.615379178038617	0.998625307316004	83.3921562967642	0.00247677335047388
ENSG00000184292.5	TACSTD2	chr1	59041099	59043166	-	2067	3904	268	116	144.592592592593	FALSE	143.497955525203	0.249238509030527	0.149155072308426	0.411484623574256	143.497955525203	1.2053537270226	2.55679931301466e-13	1.03271448615674e-10	143.497955525203	1.50628456157327	2.23451793505245e-20	2.36380075843763e-18	143.497955525203	0.0685405646260203	0.694930373380687	0.793925340429517	143.497955525203	0.202785034125761	0.24772484247062	0.556110787363269	143.497955525203	1.15876440457975	2.6325959279419e-12	8.06663703989369e-10	143.497955525203	1.18778033851551	5.97426543140345e-13	3.10452179084509e-11	143.497955525203	-0.23164970263258	0.208625112709535	0.342923187483708	143.497955525203	-0.0464534749047658	0.785180387952879	0.998625307316004	143.497955525203	-0.0465893224428546
ENSG00000162601.5	MYSM1	chr1	59120411	59165764	-	45353	979	60	35	36.2592592592593	FALSE	35.5948335502944	-0.0662561633003105	0.798055020603413	0.906884332702538	35.5948335502944	-0.254808446275892	0.340911662058061	0.589251318624379	35.5948335502944	-0.239998514534204	0.370026061834973	0.515530195275254	35.5948335502944	0.290476493230689	0.245120071643971	0.377493406694683	35.5948335502944	0.172935969022434	0.500663886884091	0.76546787660909	35.5948335502944	-0.15110543048689	0.571049079611315	0.744201360801388	35.5948335502944	0.0329253776655549	0.898988712287981	0.943049339527546	35.5948335502944	0.69900389323549	0.00471180930137352	0.0177788269435266	35.5948335502944	0.239192132322745	0.349540360745417	NA	35.5948335502944	0.103703015789002
ENSG00000177606.5	JUN	chr1	59246465	59249785	-	3320	37996	2379	1287	1407.25925925926	TRUE	1378.72648044283	-0.251630159890384	0.00814400013346865	0.0850382904653377	1378.72648044283	0.09977688094593	0.291706506576414	0.541714528200213	1378.72648044283	0.163569536094657	0.0835292265538611	0.169882192252125	1378.72648044283	0.58337595975017	4.61754187263466e-10	8.86209008212345e-09	1378.72648044283	-0.0201991106634463	0.831497556230193	0.938936728640378	1378.72648044283	0.208718041413352	0.0272701394739832	0.106421809119813	1378.72648044283	0.400439558812998	2.09343139513333e-05	0.00021067079702327	1378.72648044283	0.240569820474496	0.010986698389248	0.0354490095177269	1378.72648044283	0.231431049226937	0.0150883950357023	0.655239983142792	1378.72648044283	0.108941160467422
ENSG00000172456.12	FGGY	chr1	59762310	60233347	+	471037	911	70	32	33.7407407407407	FALSE	33.5703739479248	0.104694574346359	0.729938874395151	0.875859094983077	33.5703739479248	-0.561292828638978	0.0806412524301466	0.25297959370029	33.5703739479248	-1.20676656604252	0.000463959346270369	0.00256069012584995	33.5703739479248	-0.255812979898284	0.409114051762788	0.550566025134656	33.5703739479248	-0.249217086211417	0.427383245361334	0.714395695688641	33.5703739479248	-0.0297014312850767	0.923602084736093	0.96260006157224	33.5703739479248	-0.853425076625617	0.00984856662515204	0.034238796178052	33.5703739479248	0.685289510146894	0.0214658721087521	0.0601342180196631	33.5703739479248	-0.353911660557776	0.253585654551716	NA	33.5703739479248	0.531591397353901
ENSG00000134709.6	HOOK1	chr1	60280458	60342050	+	61592	1233	76	45	45.6666666666667	FALSE	44.8220934674029	0.434164729392332	0.0543013186731578	0.241402842991054	44.8220934674029	-0.0209105094075951	0.929927314709814	0.968037843749812	44.8220934674029	-0.165404021663596	0.494564543502317	0.634980571241379	44.8220934674029	0.409456166315988	0.069487743930232	0.144133541681616	44.8220934674029	0.168501375096297	0.471955515715044	0.745510152530145	44.8220934674029	-0.0977117065523216	0.686198011684901	0.823418872750906	44.8220934674029	0.0535195210996297	0.820624649140269	0.891887308251031	44.8220934674029	0.532720468638471	0.019754026283977	0.0562970742653686	44.8220934674029	-0.265663354296034	0.232601750041943	NA	44.8220934674029	-0.0768011971447266
ENSG00000134716.5	CYP2J2	chr1	60358980	60392462	-	33482	438	47	17	16.2222222222222	FALSE	15.6984571671561	0.841317321538804	0.016405172982594	0.126213304868684	15.6984571671561	-0.919969214148097	0.0287686759571291	0.131298641271212	15.6984571671561	-2.01238855904501	8.87626148567717e-05	0.000630491283467045	15.6984571671561	0.186693583106634	0.610078087991835	0.727183620374975	15.6984571671561	0.212822799800348	0.566184621194839	0.808247448645416	15.6984571671561	0.194407215400447	0.60194705928968	0.767748179826051	15.6984571671561	-1.023494151198	0.0166029643453864	0.0516394613836555	15.6984571671561	-0.585294251275594	0.153126403368856	0.271918709099851	15.6984571671561	-0.628494521738456	0.0680606817027178	NA	15.6984571671561	1.11437642954854
ENSG00000162599.11	NFIA	chr1	61330931	61928465	+	597534	1316	75	46	48.7407407407407	FALSE	47.938480126259	-0.0873529171654487	0.731315023501525	0.87604007803108	47.938480126259	0.292034919131968	0.241166418533772	0.485501765992547	47.938480126259	0.593766525346895	0.0150919550763376	0.0440996753726851	47.938480126259	0.231938362904794	0.34898193963409	0.488585712240196	47.938480126259	0.0462232522265403	0.856081939131071	0.948639993904315	47.938480126259	-0.0924043793631689	0.721096158095198	0.844335282755821	47.938480126259	0.224141712339185	0.370981979410936	0.527362960973536	47.938480126259	0.234251575148311	0.354402843044486	0.504440759777879	47.938480126259	0.133576169391989	0.599553326635503	NA	47.938480126259	-0.384439298495137
ENSG00000162604.8	TM2D1	chr1	62146718	62191095	-	44377	8525	425	303	315.740740740741	FALSE	310.596855168425	-0.14603236132609	0.237530545911242	0.518853596599631	310.596855168425	0.192844235877172	0.114498230488468	0.311473279534833	310.596855168425	0.406523133532639	0.000780152751590091	0.00398187096532427	310.596855168425	0.362786122129577	0.00258095781931376	0.00988551344069918	310.596855168425	0.0683640325821533	0.579012526005897	0.814652389386332	310.596855168425	0.0894210932421564	0.468379540833428	0.665118099074452	310.596855168425	0.240635504147351	0.0484553866164336	0.119074824522574	310.596855168425	0.285894730058393	0.0195256123515152	0.0558251580938108	310.596855168425	0.214396393908243	0.0824922612331063	0.937387061812198	310.596855168425	-0.103423142635015
ENSG00000132849.14	INADL	chr1	62208149	62629592	+	421443	450	34	15	16.6666666666667	FALSE	16.5121902771146	-0.0130635040595041	0.975495058113131	0.989413204701893	16.5121902771146	0.25581462199102	0.540741962369401	0.752863318764852	16.5121902771146	1.39604165910141	0.000272104588778557	0.00162188459697785	16.5121902771146	1.01154436490502	0.00925371688954866	0.0286410756811318	16.5121902771146	-0.171443855758001	0.697715200670201	0.879792432688436	16.5121902771146	0.715851940813714	0.07611206823849	0.210367601358389	16.5121902771146	0.742766787987122	0.0635732875007738	0.146440496346385	16.5121902771146	0.345688681595591	0.411030982292751	0.560187317278126	16.5121902771146	-0.158380351698497	0.717047912594909	NA	16.5121902771146	0.460037318822694
ENSG00000132854.14	KANK4	chr1	62702651	62785085	-	82434	443	60	11	16.4074074074074	FALSE	16.3153832611687	-0.355669480725648	0.400696955754307	0.668546551792776	16.3153832611687	0.632241445680571	0.103428960319129	0.293936680785831	16.3153832611687	1.93944491628282	7.97524738585185e-08	1.23248779601182e-06	16.3153832611687	-1.43945518237143	0.00375488864813088	0.0135633904582484	16.3153832611687	-0.313151862338012	0.465607766349986	0.741372649155143	16.3153832611687	-0.412034788012827	0.345282192420378	0.557850465790451	16.3153832611687	1.00175324518033	0.00810882445166807	0.0294102098275602	16.3153832611687	-2.57137999944583	0.000156782626494618	0.00103427648034979	16.3153832611687	0.0425176183876365	0.92311797915694	NA	16.3153832611687	-1.0442762336934
ENSG00000162607.8	USP1	chr1	62901968	62917475	+	15507	15345	836	563	568.333333333333	FALSE	559.484171168977	-0.359266254594364	2.98985487537329e-05	0.00219569011756753	559.484171168977	-0.389710187454121	7.1452784220987e-06	0.000288604291176223	559.484171168977	-0.681212940135312	1.40082628898369e-14	7.07258091131198e-13	559.484171168977	-0.503509156851147	6.16422994825118e-09	9.62659882603867e-08	559.484171168977	-0.220177183895017	0.0105896942523742	0.100534212742091	559.484171168977	-0.282569219518896	0.00110543735816747	0.010878091212266	559.484171168977	-0.524366908452554	2.11961336268431e-09	5.69029738393136e-08	559.484171168977	-0.173310793486002	0.0448287537350292	0.106339643803916	559.484171168977	0.139089070699347	0.110680940152184	0.970345503113109	559.484171168977	0.107140967935225
ENSG00000088035.11	ALG6	chr1	63833261	63904233	+	70972	603	48	22	22.3333333333333	FALSE	22.0757820354246	-0.176832216891168	0.567835232259261	0.78120202413002	22.0757820354246	-1.16343253692124	0.000939019241554288	0.0123433801485968	22.0757820354246	-0.91602448469646	0.00718129986122544	0.0244869649143704	22.0757820354246	-0.964972591925536	0.00407481274421085	0.0145416811425934	22.0757820354246	-0.182029271155594	0.562333612429989	0.805456393481762	22.0757820354246	-0.239760109045252	0.449461638279029	0.650051451456291	22.0757820354246	-0.222339726640767	0.479301414646186	0.629016743545415	22.0757820354246	-0.25914051508187	0.417706588646007	0.56650499797137	22.0757820354246	-0.00519705426442554	0.98687768018721	NA	22.0757820354246	0.923672427875984
ENSG00000142856.12	ITGB3BP	chr1	63906441	64059392	-	152951	2676	147	97	99.1111111111111	FALSE	97.5049803136055	0.0440026388587835	0.81870461741523	0.917056501998201	97.5049803136055	0.121651351743741	0.527349793449689	0.743997570897188	97.5049803136055	0.000549326845878065	0.997741850031978	0.998865939543055	97.5049803136055	-0.381610184888389	0.0528934648940846	0.116877817934731	97.5049803136055	0.169671420781861	0.377635790507872	0.678026246786921	97.5049803136055	0.157962733851678	0.412782733528584	0.617714275873189	97.5049803136055	-0.0406355880966423	0.834549426526998	0.900805081484182	97.5049803136055	-0.124681881276282	0.527806018427566	0.664983888382199	97.5049803136055	0.125668781923077	0.509372465462518	0.998625307316004	97.5049803136055	0.0363113821079373
ENSG00000079739.11	PGM1	chr1	64058947	64125916	+	66969	4713	274	175	174.555555555556	FALSE	171.704069486194	0.00836627748971995	0.951329026502194	0.978716583415443	171.704069486194	-0.031150216810304	0.822499040308268	0.916799607649181	171.704069486194	0.455664363971686	0.000666926394767861	0.00349634686956178	171.704069486194	0.439760811037475	0.000916546963800624	0.00407248951253206	171.704069486194	0.0225538583044493	0.870818686372354	0.953873202069694	171.704069486194	0.240552686227059	0.0782453840516099	0.213924544037867	171.704069486194	0.516197869395975	0.000107834559131754	0.000846482237142023	171.704069486194	0.447113437171059	0.000937293684935713	0.00470819202054197	171.704069486194	0.0141875808147293	0.917735202381645	0.998625307316004	171.704069486194	0.271702903037363
ENSG00000162434.7	JAK1	chr1	65298912	65432187	-	133275	6422	340	221	237.851851851852	TRUE	233.291412523974	0.198694747383727	0.13740013804472	0.394529997602087	233.291412523974	0.386593248370956	0.00372022884517251	0.0324207648057934	233.291412523974	0.536617276648027	4.99623482154639e-05	0.000383059039035903	233.291412523974	0.468873913538638	0.000371120915152064	0.00187480412282049	233.291412523974	0.017517425128315	0.897937035374225	0.96490434968525	233.291412523974	0.278319888650957	0.0386890229353475	0.134450785218419	233.291412523974	0.376453385628292	0.0047703666023864	0.019400218594419	233.291412523974	0.26981405276766	0.0459724655658929	0.108354378362015	233.291412523974	-0.181177322255412	0.176409418471304	0.991785483698827	233.291412523974	-0.108273359719999
ENSG00000162433.10	AK4	chr1	65613232	65697828	+	84596	2224	198	61	82.3703703703704	FALSE	81.0598741757654	0.898201277094464	0.00020909886557705	0.00866195942451044	81.0598741757654	1.25023018926944	1.46848131689271e-07	1.15755967532499e-05	81.0598741757654	1.84344398826592	9.89369641188414e-16	5.98063852489813e-14	81.0598741757654	2.71057409794027	1.14914715921788e-34	2.68718990968687e-32	81.0598741757654	1.00099760954804	3.88513502715467e-05	0.00261540226146185	81.0598741757654	1.14340398972114	2.11930420757715e-06	9.32284019234186e-05	81.0598741757654	1.96414641795202	7.35057969240202e-18	7.09970121159612e-16	81.0598741757654	2.62424450359297	6.64187186422098e-32	1.68627638244193e-29	81.0598741757654	0.102796332453571	0.629155520248025	0.998625307316004	81.0598741757654	-0.106826199548297
ENSG00000116675.11	DNAJC6	chr1	65713902	65881552	+	167650	916	66	33	33.9259259259259	FALSE	33.1599359626121	0.296323170300548	0.336495982983098	0.613897864621626	33.1599359626121	0.516416445002379	0.0914969602923672	0.273843714771969	33.1599359626121	0.685639507783576	0.0235695167300113	0.0627709363820756	33.1599359626121	0.0887055899966126	0.776669176905184	0.854040976543275	33.1599359626121	0.399356506125918	0.196988773746297	0.499467235725824	33.1599359626121	0.653769070862769	0.0318725397007318	0.117469675562299	33.1599359626121	0.702288531187969	0.0201979648522558	0.0603900120044231	33.1599359626121	0.066328770917153	0.836437141083068	0.898088501167731	33.1599359626121	0.103033335825371	0.730083155429772	NA	33.1599359626121	0.137352625860389
ENSG00000213625.4	LEPROT	chr1	65886270	65901690	+	15420	10885	680	403	403.148148148148	FALSE	396.816297286412	0.774643548335536	0.000682403015212799	0.0177305064128097	396.816297286412	0.876346241261123	0.000122436842087422	0.002615321583627	396.816297286412	0.755194493786016	0.000948958906154913	0.00467171680891555	396.816297286412	1.12754802265273	6.95255138663884e-07	7.13399210411925e-06	396.816297286412	0.814015444597504	0.000364761265129128	0.011609698281149	396.816297286412	0.85435561782742	0.000183234154868662	0.00278804571945707	396.816297286412	1.1711256920222	2.62529779618765e-07	4.36591138282764e-06	396.816297286412	0.988121402105159	1.48662707655384e-05	0.00013774940773991	396.816297286412	0.0393718962619678	0.861221875131726	0.998625307316004	396.816297286412	-0.0219906234337027
ENSG00000198160.10	MIER1	chr1	67390578	67454302	+	63724	4063	224	143	150.481481481481	FALSE	147.49778577845	-0.142861966983305	0.381562546278873	0.653358144891623	147.49778577845	0.0022352336329455	0.989060653698091	0.993962379803637	147.49778577845	0.0247149251879448	0.879426014765365	0.924911772660083	147.49778577845	0.0238037366733466	0.882781948333434	0.92414329670016	147.49778577845	0.0362521902704138	0.824030196473957	0.935761319599691	147.49778577845	-0.127533609234906	0.439879490507828	0.640361918848715	147.49778577845	0.0332938404419172	0.837955370278203	0.903759123715513	147.49778577845	0.0133606176955713	0.935173950898324	0.960873256306018	147.49778577845	0.179114157253719	0.272874590618308	0.998625307316004	147.49778577845	-0.129768842867851
ENSG00000116704.6	SLC35D1	chr1	67465015	67519782	-	54767	1042	57	39	38.5925925925926	FALSE	38.2731647900395	-0.197975430388224	0.427473534432931	0.688350197039825	38.2731647900395	-0.329582071261011	0.197147243574829	0.432235481471978	38.2731647900395	-0.168042631193491	0.504701384154754	0.643098712495063	38.2731647900395	-0.614590333646535	0.0179014819878956	0.0492637252847445	38.2731647900395	-0.209806495784265	0.407929548970218	0.699105491253492	38.2731647900395	-0.097059145508923	0.699628549811812	0.832471785434891	38.2731647900395	-0.045909915189171	0.85357138649713	0.915158704200471	38.2731647900395	-0.246326039214993	0.338004901137419	0.487187599595638	38.2731647900395	-0.0118310653960412	0.963065728322666	NA	38.2731647900395	0.232522925752088
ENSG00000142864.10	SERBP1	chr1	67873493	67896098	-	22605	32849	1643	1158	1216.62962962963	FALSE	1194.0868413735	-0.218018947913263	0.0366005063925885	0.199553273487168	1194.0868413735	-0.048188170983297	0.643855104600713	0.820228709776034	1194.0868413735	-0.0767416567998329	0.461834348848568	0.605021380490694	1194.0868413735	-0.249188806681207	0.0168984888085782	0.0469984261511819	1194.0868413735	-0.104943641218184	0.31473064412606	0.621902713743422	1194.0868413735	-0.13632713040582	0.192135771750342	0.382721019451588	1194.0868413735	-0.160327444170849	0.124839265680647	0.244613388056941	1194.0868413735	-0.271417401712677	0.00969880295608311	0.0318726194777199	1194.0868413735	0.113075306695078	0.279572746756583	0.998625307316004	1194.0868413735	-0.0881389594225232
ENSG00000116717.7	GADD45A	chr1	68150744	68154021	+	3277	8720	579	324	322.962962962963	FALSE	315.472200537406	-0.680711731043178	7.55448996990733e-07	0.000129094611293455	315.472200537406	-0.849680778413344	1.06719077281211e-09	1.84656468840585e-07	315.472200537406	-1.18102892706112	7.8962947574396e-17	5.65858671085551e-15	315.472200537406	-0.395424460536053	0.00367372321961942	0.0133204445635957	315.472200537406	-0.760132657706702	4.48387423006972e-08	1.47569282994072e-05	315.472200537406	-0.593198074573513	1.76406307155268e-05	0.000454361288516437	315.472200537406	-0.825117618486796	3.08588998266586e-09	8.11278650472451e-08	315.472200537406	-0.659510892117343	2.06325806860103e-06	2.37796513587403e-05	315.472200537406	-0.0794209266635249	0.574270672947314	0.998625307316004	315.472200537406	0.25648270383983
ENSG00000172380.5	GNG12	chr1	68167149	68299150	-	132001	6828	369	258	252.888888888889	FALSE	247.89380218559	0.114811284366593	0.508222060329555	0.743262216604415	247.89380218559	0.256005091819735	0.139975333777008	0.35225738202846	247.89380218559	0.544776316498676	0.00154896808022828	0.00701535696274644	247.89380218559	0.110310926982048	0.524689617563193	0.655659111470474	247.89380218559	0.0871956585930359	0.617427009489705	0.836860342636595	247.89380218559	0.0926218574509985	0.59611094561048	0.76315255189378	247.89380218559	0.412238241639559	0.0170020293073523	0.0525678609690789	247.89380218559	-0.250611735820039	0.15817661435244	0.278001002560584	247.89380218559	-0.0276156257735574	0.873368598653202	0.998625307316004	247.89380218559	-0.163383234368737
ENSG00000116729.9	WLS	chr1	68564142	68698803	-	134661	5889	310	221	218.111111111111	FALSE	212.960349688262	0.0106543664831328	0.935503889369853	0.970770577067846	212.960349688262	-0.0298643104390082	0.822270836631637	0.916799607649181	212.960349688262	-0.259276657188195	0.0550604916220419	0.123771193663917	212.960349688262	0.215800632662765	0.0969422753325753	0.186820442117819	212.960349688262	-0.109611393357342	0.413207744480899	0.702108137756391	212.960349688262	-0.226056735294765	0.0950007930239363	0.2432786878417	212.960349688262	-0.180801954372766	0.178360644408401	0.317964309508657	212.960349688262	0.249854672550952	0.0579365683774883	0.129352850905116	212.960349688262	-0.120265759840474	0.36590369848483	0.998625307316004	212.960349688262	-0.196192424855756
ENSG00000024526.12	DEPDC1	chr1	68939835	68962904	-	23069	2957	178	109	109.518518518519	FALSE	107.484406727465	-0.275440812012648	0.103274244289003	0.332958361392152	107.484406727465	-0.248676246086154	0.143863544934181	0.358187576431812	107.484406727465	-0.384472949786451	0.0254148439063354	0.0665398653363865	107.484406727465	-1.52922293880361	7.64994198407495e-16	3.7592244607218e-14	107.484406727465	-0.17818428256052	0.293824581439155	0.603542586839652	107.484406727465	-0.173186522238461	0.308594598545381	0.520436050745988	107.484406727465	-0.0962308937925256	0.567895398595248	0.70596411572537	107.484406727465	-0.998526011472542	5.95122396425178e-08	1.01697261819887e-06	107.484406727465	0.0972565294521287	0.570642842489002	0.998625307316004	107.484406727465	0.0754897238476937
ENSG00000066557.5	LRRC40	chr1	70610488	70671303	-	60815	1480	95	47	54.8148148148148	FALSE	53.7156125200377	0.0802673886723103	0.702470117814179	0.862642000658988	53.7156125200377	-0.259886579064372	0.232489383253904	0.474632295563831	53.7156125200377	-1.07618170259673	6.12619673204537e-06	6.16504916885109e-05	53.7156125200377	-0.795387849914505	0.000433680425990925	0.0021409357029752	53.7156125200377	-0.0759582778244285	0.723922189064864	0.892944554696055	53.7156125200377	-0.478916156044258	0.0322885053479252	0.118511217894119	53.7156125200377	-0.736042199809762	0.00125298564838376	0.00644026552028774	53.7156125200377	-0.339158867096847	0.12665862704863	0.235951480074241	53.7156125200377	-0.156225666496739	0.461598486867656	NA	53.7156125200377	-0.219029576979885
ENSG00000116754.9	SRSF11	chr1	70671365	70718735	+	47370	21916	1017	826	811.703703703704	FALSE	798.78235748441	0.026453706732326	0.808866827508977	0.912362354562677	798.78235748441	-0.273798103114614	0.0132384928475925	0.0793238350935312	798.78235748441	-0.0852007232715582	0.43855662861642	0.58434760861981	798.78235748441	-0.166140756022496	0.130142988822406	0.234071206149517	798.78235748441	-0.0141745551934376	0.89733261935705	0.964521308286772	798.78235748441	-0.0117811336478728	0.914669041476994	0.957746568506118	798.78235748441	-0.220648474819712	0.0456289076008462	0.113510210789787	798.78235748441	-0.0151651391094053	0.890470325292253	0.933874579316294	798.78235748441	-0.0406282619257635	0.710646643738922	0.998625307316004	798.78235748441	0.262016969466741
ENSG00000118454.8	ANKRD13C	chr1	70726271	70820417	-	94146	1399	79	58	51.8148148148148	FALSE	51.0789196056225	0.712588595893133	0.00624572212834633	0.0732183203594796	51.0789196056225	0.378702055956641	0.157465784939172	0.37780895740984	51.0789196056225	0.292952533084827	0.277568107541941	0.418258471022161	51.0789196056225	0.538934385960768	0.0402332877899018	0.0944242245132595	51.0789196056225	0.470731113438294	0.0777715890283319	0.308933484326619	51.0789196056225	0.618752002223368	0.0195173311102647	0.0852939165122303	51.0789196056225	0.414649330587283	0.120912453777809	0.238793338942405	51.0789196056225	0.663731866631807	0.0123336171779193	0.038688502732841	51.0789196056225	-0.241857482454839	0.335960456640777	NA	51.0789196056225	0.240049946266727
ENSG00000116761.7	CTH	chr1	70876901	70905534	+	28633	920	54	32	34.0740740740741	FALSE	33.2476067060681	0.386076718485015	0.167413659056262	0.438184911450351	33.2476067060681	0.482707025837758	0.0847833812306959	0.261682919630415	33.2476067060681	0.531378534843516	0.0571348461536941	0.127402821310345	33.2476067060681	0.776839501563849	0.00417653800200279	0.0148391510139131	33.2476067060681	0.453396519154351	0.107537131434309	0.366120670469452	33.2476067060681	0.194349939543746	0.501942174176423	0.690936006340431	33.2476067060681	-0.136614901793222	0.646003651814653	0.768356103603937	33.2476067060681	0.211257040798359	0.467660886963292	0.612022774897763	33.2476067060681	0.0673198006693357	0.80166585648832	NA	33.2476067060681	-0.288357086294012
ENSG00000132485.8	ZRANB2	chr1	71528974	71546980	-	18006	13599	760	496	503.666666666667	FALSE	495.369840405294	-0.0906931593823428	0.494737942472537	0.736265509430742	495.369840405294	-0.589639757241257	1.30622407728063e-05	0.000453402623074832	495.369840405294	-0.410628970482318	0.00226468895781171	0.00964718412229859	495.369840405294	-0.0557591400778952	0.674188954054232	0.778200601531081	495.369840405294	-0.383572564132235	0.00433816701916331	0.0578813095079357	495.369840405294	-0.0534283944335336	0.688653004351686	0.824713018419014	495.369840405294	-0.411258041992513	0.00223196603628129	0.010416623003359	495.369840405294	0.200261482616683	0.131287122292726	0.242489579857237	495.369840405294	-0.292879404749892	0.0293237119716548	0.772422219080896	495.369840405294	0.536211362807723
ENSG00000116791.9	CRYZ	chr1	75171170	75199092	-	27922	5728	332	217	212.148148148148	FALSE	207.577587091972	0.166137717127267	0.235432256882506	0.516683387171634	207.577587091972	0.215824940670006	0.124466749892036	0.328876461356119	207.577587091972	-0.598475461916413	4.87120721986153e-05	0.000375091398229546	207.577587091972	-0.39272721009405	0.00633191232363882	0.0210180698198934	207.577587091972	0.172544558445714	0.220957948491961	0.525403353037079	207.577587091972	-0.331812453849226	0.0223547096586719	0.0934795058950393	207.577587091972	-0.446811079972381	0.00217250570836102	0.010203427972778	207.577587091972	-0.504688884662581	0.000629686522961659	0.00335254310547472	207.577587091972	0.00640684131844621	0.963270427383576	0.998726332951763	207.577587091972	-0.547637394519232
ENSG00000162623.11	TYW3	chr1	75198836	75232362	+	33526	4277	236	161	158.407407407407	FALSE	155.65642884562	-0.0174911845063001	0.902131386006167	0.954534204079332	155.65642884562	-0.231457837008557	0.11195284053008	0.307502979229769	155.65642884562	-0.250179989567569	0.0866001231236126	0.175132555860772	155.65642884562	-0.174540554260339	0.223796913865245	0.352224473362835	155.65642884562	0.215087017284286	0.128627896748894	0.402885967751383	155.65642884562	-0.196689488833922	0.178054162258094	0.364980227410709	155.65642884562	-0.421496312737332	0.00438625024203233	0.01815864982882	155.65642884562	-0.204972380654611	0.162888837758989	0.284591075958785	155.65642884562	0.232578201790586	0.0982596340379273	0.951138961877975	155.65642884562	0.0347683481746352
ENSG00000117054.9	ACADM	chr1	76190036	76253260	+	63224	3588	187	130	132.888888888889	FALSE	130.854053821428	0.172605125086593	0.258021904898631	0.540606068516795	130.854053821428	0.18561697750223	0.227401304473863	0.468535381423908	130.854053821428	-0.0998368083652637	0.526417302664195	0.662569993126634	130.854053821428	-0.118514391134732	0.446627438225955	0.585778560848682	130.854053821428	0.294991388731159	0.0537920773156843	0.254795521869494	130.854053821428	0.130678016085617	0.400131092252356	0.607062469823192	130.854053821428	0.293088009310145	0.0548434099279332	0.131499876044149	130.854053821428	0.474427234551796	0.00181106278383851	0.00811144349656704	130.854053821428	0.122386263644565	0.413163648834795	0.998625307316004	130.854053821428	-0.0549389614166131
ENSG00000137955.11	RABGGTB	chr1	76251879	76260764	+	8885	1805	137	72	66.8518518518518	FALSE	65.8624219447365	-0.484941799065904	0.251372619561244	0.53339508172684	65.8624219447365	-0.198230763570054	0.638264533393047	0.816625376452434	65.8624219447365	-2.08144595084235	3.29336945042357e-06	3.61294826376096e-05	65.8624219447365	-1.1116099732466	0.00946258646104998	0.0292061630055193	65.8624219447365	-0.201225229282334	0.63335514028424	0.845316235139708	65.8624219447365	-0.976353048137069	0.0229776728648585	0.095055680203507	65.8624219447365	-0.426097311454183	0.314254962177499	0.468063961432997	65.8624219447365	-0.365995741999346	0.38785713782563	0.537799624103019	65.8624219447365	0.28371656978357	0.503748396855505	0.998625307316004	65.8624219447365	-0.778122284567015
ENSG00000142892.10	PIGK	chr1	77554675	77685115	-	130440	1711	98	62	63.3703703703704	FALSE	62.5787056159952	-0.343119398525437	0.0724968013351736	0.280420070960122	62.5787056159952	-0.146924288340231	0.438308447166738	0.673958965482546	62.5787056159952	-0.242296807848926	0.206066355944532	0.336291210086889	62.5787056159952	-0.934563044773932	4.36960227078294e-06	3.79553135661557e-05	62.5787056159952	-0.455238881589487	0.0204695735014996	0.14776351924634	62.5787056159952	-0.267711475648115	0.165894324964355	0.349238799249765	62.5787056159952	-0.273064354841078	0.154860566405681	0.288149704795932	62.5787056159952	-0.482009230726509	0.0155554072463259	0.0466504720860114	62.5787056159952	-0.11211948306405	0.575645505193565	0.998625307316004	62.5787056159952	-0.120787187307884
ENSG00000154027.14	AK5	chr1	77747736	78025651	+	277915	977	73	35	36.1851851851852	FALSE	35.5505976230414	-0.149208852476256	0.544830236250868	0.766280702647232	35.5505976230414	-0.375609029857059	0.140358389668326	0.352821683335996	35.5505976230414	0.344417241769834	0.149931087535718	0.265343087799719	35.5505976230414	-0.915329043038225	0.000606550807389845	0.00285326123582115	35.5505976230414	-0.341925262588208	0.179930984961493	0.477844211705866	35.5505976230414	-0.270516712398853	0.286778751788791	0.495781320699455	35.5505976230414	-0.474096263860382	0.0656799298985469	0.150226990238993	35.5505976230414	-1.48154531764189	1.07365487027207e-06	1.33433526954372e-05	35.5505976230414	-0.192716410111952	0.451305935601235	NA	35.5505976230414	0.105092317458206
ENSG00000036549.8	ZZZ3	chr1	78028101	78149104	-	121003	4126	207	151	152.814814814815	FALSE	150.603727931275	-0.33756671552901	0.0112123929166366	0.100983262233571	150.603727931275	-0.185781079780264	0.161292304479805	0.382504248093821	150.603727931275	-0.00727023150774503	0.955638968995241	0.973992567789489	150.603727931275	-0.302641817761211	0.0221910181200873	0.0584784659000877	150.603727931275	-0.139092686214331	0.29404625968609	0.603858346099052	150.603727931275	0.061440849920868	0.637952524533377	0.791738286732345	150.603727931275	0.0438280685571417	0.736014566126022	0.834814068128348	150.603727931275	-0.111010534728763	0.405524630742619	0.554553996426426	150.603727931275	0.19847402931468	0.142326352799449	0.975431061423351	150.603727931275	0.247221929701132
ENSG00000077254.10	USP33	chr1	78161672	78225537	-	63865	7592	471	266	281.185185185185	FALSE	274.399825589464	-0.428243116316448	0.000731375393480801	0.0186752923749149	274.399825589464	-0.242818679270341	0.0547143731688967	0.19804151526632	274.399825589464	-0.579906779358565	6.75270687706026e-06	6.7345177676271e-05	274.399825589464	-0.297730839415516	0.0179539090777364	0.049392704664014	274.399825589464	-0.321319821322948	0.0114764785773308	0.105722010489829	274.399825589464	-0.567379470978006	1.12448038962717e-05	0.000321290441872251	274.399825589464	-0.688956221148319	1.07892377581148e-07	1.95659523915527e-06	274.399825589464	-0.394303973791836	0.00212176421747073	0.00919547147018085	274.399825589464	0.106923294993499	0.407021409661755	0.998625307316004	274.399825589464	-0.324560791707665
ENSG00000180488.10	FAM73A	chr1	78245309	78344106	+	98797	664	39	26	24.5925925925926	FALSE	23.9444632160617	0.0838683682000666	0.770926200519278	0.89542978764183	23.9444632160617	0.00919414623411034	0.974995468649821	0.988435760351875	23.9444632160617	0.409169141976592	0.148445717300082	0.263764975790548	23.9444632160617	-0.0656196576591015	0.82186475556833	0.882571207025991	23.9444632160617	-0.511190374332137	0.102712456133872	0.357362132030378	23.9444632160617	-0.610775706456966	0.0554545444170822	0.170863065773298	23.9444632160617	-0.56595631324601	0.0711965219860738	0.159801034192536	23.9444632160617	-0.622671816847954	0.053494712840387	0.121948183247737	23.9444632160617	-0.595058742532203	0.0535072243679061	NA	23.9444632160617	-0.619969852691077
ENSG00000162614.14	NEXN	chr1	78354198	78409580	+	55382	7189	426	256	266.259259259259	FALSE	258.925253109124	-0.185700650922993	0.160276802478463	0.429888218177973	258.925253109124	-0.623650446370961	4.53704737890327e-06	0.000201581015044672	258.925253109124	-0.569245172378212	2.72068559513151e-05	0.000224475507876867	258.925253109124	-0.0498062452521339	0.704621097255483	0.801523389150399	258.925253109124	-0.455193448448269	0.000745492317551645	0.0185040355691729	258.925253109124	-0.462602832791354	0.000628582478878221	0.00709731119099348	258.925253109124	-0.631519109869633	3.50599582013874e-06	4.36946407542116e-05	258.925253109124	-0.698968359169371	3.91435952087437e-07	5.45188067437142e-06	258.925253109124	-0.269492797525276	0.0465175387721444	0.86467318059931	258.925253109124	0.161047613579608
ENSG00000162613.12	FUBP1	chr1	78409740	78444794	-	35054	20310	1084	726	752.222222222222	TRUE	737.153890208532	-0.271718265711852	0.000653532809410466	0.0171813388888207	737.153890208532	-0.228668719318179	0.00427127920415342	0.0360100445997223	737.153890208532	-0.494762809223541	1.10904988724143e-09	2.60714743334056e-08	737.153890208532	-0.410816846775007	2.96447356649394e-07	3.2886781662753e-06	737.153890208532	-0.100141466803816	0.208717539395234	0.51290488248508	737.153890208532	-0.291354213585167	0.000298440172483278	0.00399990855608809	737.153890208532	-0.458550935132215	1.51886914218803e-08	3.44302836670481e-07	737.153890208532	-0.37889287931353	3.08836098999736e-06	3.44330937981387e-05	737.153890208532	0.171576798908036	0.032456235200167	0.810573668845196	737.153890208532	-0.0626854942669878
ENSG00000162616.8	DNAJB4	chr1	78444859	78483648	+	38789	1887	137	67	69.8888888888889	FALSE	68.6543492140107	0.395230829429119	0.0575573576387157	0.249490087793965	68.6543492140107	-0.158406428515787	0.468105101872543	0.698267909222665	68.6543492140107	-0.243330328634621	0.269248925709496	0.408772587366237	68.6543492140107	-0.466855412969336	0.0351017401527049	0.0847885058190934	68.6543492140107	0.907724855507765	8.77732178668766e-06	0.00091881279030002	68.6543492140107	0.226066031436963	0.28867963675507	0.498415465554815	68.6543492140107	0.00324883927955081	0.987975949209405	0.993004669683834	68.6543492140107	-0.696644116015147	0.00288443668295119	0.011893783927937	68.6543492140107	0.512494026078645	0.00910923840026098	0.526576828867761	68.6543492140107	0.384472459952751
ENSG00000137959.11	IFI44L	chr1	79085607	79111830	+	26223	24143	1556	949	894.185185185185	FALSE	875.417510028973	0.443241777959538	0.000115952392856318	0.0058548282804043	875.417510028973	-0.302976715551425	0.00950348555373868	0.063067940724811	875.417510028973	-1.35003197756862	6.87903407382798e-29	1.35837992844523e-26	875.417510028973	0.29622013100359	0.0101184461231469	0.0309296567768433	875.417510028973	0.225234930450759	0.0514586395685705	0.250008733146526	875.417510028973	0.0482765361323647	0.677551070233333	0.818254798871078	875.417510028973	-1.01543492961754	1.80385671599262e-17	1.66969487274067e-15	875.417510028973	0.142086879484425	0.220717181324397	0.357443570849024	875.417510028973	-0.218006847508778	0.0571385743167168	0.886180118215023	875.417510028973	0.35125325168379
ENSG00000137965.6	IFI44	chr1	79115481	79129763	+	14282	9300	572	364	344.444444444444	FALSE	335.070330719584	0.127512606288414	0.394898077564127	0.663841149684985	335.070330719584	-0.519770518317202	0.000681875247263525	0.00999858654650772	335.070330719584	-1.94330266555457	5.98696118036404e-32	1.47778158468652e-29	335.070330719584	0.082704947401528	0.581207310699598	0.70324185224355	335.070330719584	-0.127228260330717	0.400532817145946	0.694306622893261	335.070330719584	-0.343435575978771	0.0242893669840074	0.0987352767703065	335.070330719584	-1.39537496902605	1.84683107376171e-18	1.93069893193489e-16	335.070330719584	-0.40097017085114	0.00879947061174231	0.0294953209565983	335.070330719584	-0.254740866619131	0.0906101280917252	0.947515112468378	335.070330719584	0.176334942338431
ENSG00000137941.12	TTLL7	chr1	84330711	84464833	-	134122	1552	92	57	57.4814814814815	FALSE	56.7751139551016	-0.0604529484041366	0.768457996463154	0.894370367592873	56.7751139551016	0.146293348549137	0.472304302884818	0.701704737574735	56.7751139551016	0.197467376930486	0.330492619753656	0.475368123091567	56.7751139551016	-0.420426302227083	0.0480703741995388	0.108497166659157	56.7751139551016	0.105464975638357	0.607166663683509	0.830009366068798	56.7751139551016	0.0491782726311037	0.812168380194524	0.901913273130864	56.7751139551016	0.274318922493238	0.173000147540435	0.311190143936095	56.7751139551016	-0.261097847135619	0.226144500803312	0.363582419782564	56.7751139551016	0.165917924042494	0.416447920452384	0.998625307316004	56.7751139551016	-0.0971150759180332
ENSG00000142875.15	PRKACB	chr1	84543745	84704181	+	160436	1042	68	37	38.5925925925926	FALSE	37.8155683305906	0.16668210971527	0.483780857316122	0.726898325686686	37.8155683305906	0.175870185594341	0.464595478467835	0.695988857264963	37.8155683305906	0.458645378395316	0.0504478432184644	0.115446699675322	37.8155683305906	-0.369974664733867	0.141914276517319	0.249960408549633	37.8155683305906	-0.0894180428799559	0.719392760340372	0.89144470631309	37.8155683305906	0.142149831512606	0.559064002818641	0.733856299350837	37.8155683305906	0.385192506876599	0.102234473859524	0.209758766333653	37.8155683305906	-0.0953027315032308	0.705381118824986	0.806471295618338	37.8155683305906	-0.256100152595226	0.290101777691584	NA	37.8155683305906	-0.0337203540817349
ENSG00000117133.6	RPF1	chr1	84944942	84963473	+	18531	4994	256	184	184.962962962963	FALSE	181.518595261252	-0.164110122512327	0.232231646678075	0.513304956460387	181.518595261252	-0.293292784206249	0.0357841353069109	0.152277997262396	181.518595261252	-0.245112305677198	0.0785999182654411	0.162314402441717	181.518595261252	-0.0546195770494852	0.688469205911652	0.788673116376297	181.518595261252	-0.0840545585359984	0.542588234054555	0.793913888985473	181.518595261252	-0.303631287378595	0.0307555880750278	0.114877745117569	181.518595261252	-0.444631892903561	0.00166055775217342	0.0081930683985636	181.518595261252	-0.118959618432911	0.393129670311917	0.542277281960834	181.518595261252	0.0800555639763285	0.563259649394363	0.998625307316004	181.518595261252	-0.0103385031723465
ENSG00000174021.6	GNG5	chr1	84964008	84972248	-	8240	7915	389	287	293.148148148148	FALSE	286.81865066563	0.0503242794459609	0.671789621905223	0.844703916831726	286.81865066563	0.0524292426397735	0.660863732976547	0.829221132918166	286.81865066563	-0.120718127616592	0.317369536109619	0.461637861821914	286.81865066563	-0.0531533249646458	0.655732881221473	0.762975302151893	286.81865066563	-0.11510008430238	0.340893974824768	0.646156966786025	286.81865066563	-0.194360599939454	0.110271632846211	0.266378968156228	286.81865066563	-0.227642467886582	0.0609468042219209	0.141587791455161	286.81865066563	-0.281236909391363	0.0221276887195054	0.0615157868225421	286.81865066563	-0.165424363748341	0.167592302689338	0.985126099538007	286.81865066563	-0.246789842579227
ENSG00000117151.8	CTBS	chr1	85015289	85040163	-	24874	1165	65	43	43.1481481481481	FALSE	42.4553670563892	-0.121932388448673	0.591929415241324	0.795145092038459	42.4553670563892	0.0977564770059078	0.663834394126555	0.830587500170173	42.4553670563892	-0.391895255970766	0.100278656292734	0.195630178974559	42.4553670563892	-0.0747007901360264	0.740670706459001	0.827353852620324	42.4553670563892	0.022190013971014	0.922380312447123	0.975746601952993	42.4553670563892	-0.0671598501873249	0.77109551116956	0.874308372113399	42.4553670563892	-0.117767177567512	0.608961825757942	0.738835989034007	42.4553670563892	0.370893595886332	0.094825717242082	0.189523464555362	42.4553670563892	0.144122402419687	0.527494812163977	NA	42.4553670563892	-0.164916327193233
ENSG00000117155.12	SSX2IP	chr1	85109390	85156486	-	47096	2159	123	77	79.962962962963	FALSE	78.5085820750288	-0.0105134064778842	0.956003880652601	0.980672156955353	78.5085820750288	-0.409574637964023	0.0385636691913154	0.159162454451476	78.5085820750288	-0.565219062401436	0.00492065737835365	0.0180607027939077	78.5085820750288	-0.788186057650755	9.70030570883057e-05	0.00058717245591736	78.5085820750288	0.00221069330096067	0.990831663747039	0.995874919585588	78.5085820750288	-0.0727495336666082	0.707516497038345	0.836159632129549	78.5085820750288	-0.468876086397848	0.0185115288113683	0.0562948134900131	78.5085820750288	-0.428701345047711	0.0326879168649859	0.0832771147501282	78.5085820750288	0.0127240997788449	0.946925597219777	0.998625307316004	78.5085820750288	0.336825104297415
ENSG00000153898.8	MCOLN2	chr1	85391268	85462796	-	71528	1663	104	61	61.5925925925926	FALSE	60.2095217094975	-0.0967462461068335	0.694887247620871	0.857844968374417	60.2095217094975	0.053645913136081	0.827562538828014	0.91912156678155	60.2095217094975	-0.271183735820462	0.280429671800216	0.421498319285643	60.2095217094975	-0.380277488601378	0.128873260951658	0.232322348964747	60.2095217094975	0.0986044478624506	0.688687886108027	0.873990367888592	60.2095217094975	-0.568740010730766	0.0273619759714365	0.106493014281211	60.2095217094975	-0.739529709018658	0.00444780273415094	0.0183487349562048	60.2095217094975	-0.323406111140314	0.203364327828944	0.336068513096692	60.2095217094975	0.195350693969284	0.427012693905462	0.998625307316004	60.2095217094975	-0.622385923866847
ENSG00000055732.8	MCOLN3	chr1	85483765	85514182	-	30417	782	41	29	28.962962962963	FALSE	28.6270866030405	0.329769677548615	0.260057046043411	0.543094456202525	28.6270866030405	0.0223718852963947	0.941358337777424	0.972312059660975	28.6270866030405	0.436223904981058	0.137073575584511	0.248578733192645	28.6270866030405	0.000226807528170506	0.999398123769743	0.999546882431513	28.6270866030405	0.318392519377836	0.283632108895042	0.593863081913606	28.6270866030405	0.173321462893404	0.565879585225683	0.739394899158934	28.6270866030405	-0.193234676171803	0.534628234184491	0.677635396662764	28.6270866030405	0.417681385751465	0.159520285227534	0.279806011553863	28.6270866030405	-0.0113771581707787	0.968133345227158	NA	28.6270866030405	0.150949577597009
ENSG00000162642.9	C1orf52	chr1	85715639	85725355	-	9716	2299	117	84	85.1481481481482	FALSE	83.3602426271699	-0.156914440581279	0.377312520054894	0.650271344687314	83.3602426271699	-0.564877647559625	0.00249526604928312	0.024691463378541	83.3602426271699	-0.436295795897427	0.0181334690776744	0.0508257269299077	83.3602426271699	-0.0423128763715322	0.809712168301918	0.875423084016406	83.3602426271699	-0.161095669835822	0.371374830103815	0.671949231486668	83.3602426271699	-0.0560255965311493	0.754394911298935	0.863859946108548	83.3602426271699	-0.188380084591621	0.295549491821239	0.448395558190802	83.3602426271699	0.115672008468459	0.514493715446801	0.653393047800525	83.3602426271699	-0.00418122925454244	0.981560841380723	0.998726332951763	83.3602426271699	0.508852051028476
ENSG00000142867.8	BCL10	chr1	85731931	85742773	-	10842	2086	134	76	77.2592592592593	TRUE	75.4595802827381	0.6096340614617	0.0519132167224165	0.236319690868309	75.4595802827381	0.484385158765506	0.125072413497007	0.329889214103733	75.4595802827381	-0.0475183826247655	0.882630548072231	0.927184661327562	75.4595802827381	0.77862284565152	0.0126187509082222	0.0371784550963073	75.4595802827381	0.509881950798162	0.106432864905916	0.36408044901987	75.4595802827381	0.0444100764690699	0.890108371690054	0.945999640095422	75.4595802827381	0.446428909326303	0.1580591634971	0.291513849488424	75.4595802827381	0.358731311995541	0.259831919963776	0.402355634013793	75.4595802827381	-0.0997521106635383	0.7463342460066	0.998625307316004	75.4595802827381	-0.439975082296436
ENSG00000153904.14	DDAH1	chr1	85784164	86043933	-	259769	8251	545	284	305.592592592593	FALSE	298.819952122862	-0.507813920616865	0.000267019549714758	0.0101109249159158	298.819952122862	-0.0874921158573793	0.525091735200766	0.741836486824656	298.819952122862	-0.0360754245670614	0.792971473481262	0.867669562043406	298.819952122862	-0.359641321455942	0.00930483328621548	0.0287714316450839	298.819952122862	-0.547146248207567	9.9260537511924e-05	0.00490016186850531	298.819952122862	-0.265045763772518	0.0565456820870436	0.172906032699749	298.819952122862	-0.322449168130243	0.0203473749648883	0.0606937811137956	298.819952122862	-0.762255726006934	9.71909986995022e-08	1.5759839679631e-06	298.819952122862	-0.0393323275907021	0.782753620862096	0.998625307316004	298.819952122862	-0.177553647915138
ENSG00000142871.11	CYR61	chr1	86046444	86049645	+	3201	194111	17267	6558	7189.2962962963	FALSE	7036.0328212686	-0.954085671494519	2.45226661616707e-06	0.000315809292047255	7036.0328212686	-0.581954244603516	0.00404296713383102	0.0344446845169918	7036.0328212686	-0.88122083413639	1.34950050584e-05	0.000122488881459594	7036.0328212686	-0.660496942855519	0.00110237980537812	0.00477841314662925	7036.0328212686	-0.854726091990772	2.43110050388775e-05	0.00185888788704972	7036.0328212686	-0.552781016447451	0.00632182274949911	0.0394215557558239	7036.0328212686	-0.400806964406975	0.0476801696809258	0.117429597501304	7036.0328212686	-0.680723593995491	0.000773684791195455	0.00398968241865794	7036.0328212686	0.0993595795037467	0.623861851975323	0.998625307316004	7036.0328212686	0.0291732281560653
ENSG00000117174.6	ZNHIT6	chr1	86115106	86174116	-	59010	2882	180	106	106.740740740741	FALSE	104.936965395787	-0.413954346533314	0.00842875184244301	0.0864643575216266	104.936965395787	-0.334674946756321	0.0337428893271054	0.145978244674128	104.936965395787	-0.845565162407359	3.546828956333e-07	4.79712665235541e-06	104.936965395787	-0.346971849755169	0.0260530241762255	0.0663534459243163	104.936965395787	-0.397277814215544	0.0125032173017544	0.111326241426242	104.936965395787	-0.375103405258492	0.0184906595698059	0.0821700220605998	104.936965395787	-0.830509716594007	5.23858580754141e-07	8.16430454492107e-06	104.936965395787	-0.348850153365375	0.029027496565814	0.075819616250389	104.936965395787	0.0166765323177697	0.918333397322626	0.998625307316004	104.936965395787	-0.0404284585021711
ENSG00000122417.11	ODF2L	chr1	86814344	86862023	-	47679	3256	180	118	120.592592592593	FALSE	117.821669857779	0.154867271989581	0.396199997182755	0.665083597291239	117.821669857779	0.301884481521167	0.0976732917274725	0.284565531242728	117.821669857779	0.337176606640018	0.0639828057610804	0.13836729423046	117.821669857779	0.0937502543878341	0.608216418889471	0.725946565863471	117.821669857779	0.0995821024097143	0.590101494587297	0.819271479198795	117.821669857779	0.325074971848291	0.0752734312805604	0.208894350518132	117.821669857779	0.0948567199503235	0.607334221160412	0.737465412576035	117.821669857779	0.109719417582621	0.555102914933098	0.686991057722585	117.821669857779	-0.0552851695798663	0.761151326806033	0.998625307316004	117.821669857779	0.0231904903271239
ENSG00000097033.10	SH3GLB1	chr1	87170259	87213867	+	43608	11386	661	389	421.703703703704	FALSE	413.83605436566	0.179750220571666	0.0999502534543505	0.327620810072649	413.83605436566	0.115503837456605	0.294837709199099	0.544683551755341	413.83605436566	0.334490877800326	0.00218177790460912	0.0093439642798828	413.83605436566	0.392307646278194	0.000286183182047036	0.00150921291137683	413.83605436566	0.0600723254948353	0.587604635042455	0.818919250173731	413.83605436566	0.323524725179252	0.00313321349345217	0.0241053983574164	413.83605436566	0.375325449292302	0.000571470682208294	0.00335187358554647	413.83605436566	0.160826858458873	0.146466813403102	0.263515712472154	413.83605436566	-0.119677895076831	0.272979139189902	0.998625307316004	413.83605436566	0.208020887722647
ENSG00000183291.11	SEP15	chr1	87328132	87380107	-	51975	8788	447	328	325.481481481481	FALSE	320.001470622699	0.0874198460936519	0.530477786266376	0.756183934700405	320.001470622699	0.219611221007927	0.114987336804522	0.312309572836061	320.001470622699	-0.244288595714518	0.0855613904279949	0.173386206463663	320.001470622699	0.193855850315024	0.162269709610181	0.277769256318434	320.001470622699	0.189710596298166	0.174265175077902	0.469986526774873	320.001470622699	-0.0328301118550592	0.816015589800667	0.903800666087265	320.001470622699	0.13154169188663	0.346846597097256	0.503317290740869	320.001470622699	0.362583238391103	0.0092199651155355	0.0306177371689421	320.001470622699	0.102290750204514	0.460384925242645	0.998625307316004	320.001470622699	-0.252441332862986
ENSG00000153936.12	HS2ST1	chr1	87380331	87602334	+	222003	3236	160	125	119.851851851852	FALSE	117.69185846154	0.175871607336236	0.299526165034165	0.583831116717797	117.69185846154	0.0651375838122752	0.705129297587221	0.853522200164672	117.69185846154	-0.113972581819637	0.514013993148685	0.650645063122395	117.69185846154	0.234072199205216	0.165130433740151	0.281084246079686	117.69185846154	0.186048487628758	0.276970602163676	0.587529427268185	117.69185846154	0.118721255500359	0.490952204659045	0.682616380941993	117.69185846154	0.101735500398271	0.553677818937978	0.693638953768909	117.69185846154	0.290295998008031	0.0896895434435077	0.181420733676078	117.69185846154	0.0101768802925226	0.951636387020876	0.998726332951763	117.69185846154	0.0535836716880842
ENSG00000143013.8	LMO4	chr1	87794151	87814606	+	20455	4009	228	134	148.481481481481	FALSE	144.93473423558	-0.156705085409034	0.304230904431564	0.587694742778017	144.93473423558	-0.175140504973095	0.255285886268208	0.501319422183271	144.93473423558	-0.102846469340883	0.502373627657543	0.641484704032896	144.93473423558	0.124823677802	0.404457989142143	0.545539418870231	144.93473423558	-0.383601944770329	0.0144428165437846	0.120280101038491	144.93473423558	-0.351374094618459	0.0250835884777476	0.100492681340516	144.93473423558	-0.0722751645426234	0.636542972289676	0.761076540872721	144.93473423558	-0.333441734110334	0.0341811047619846	0.0860678087035975	144.93473423558	-0.226896859361295	0.149105863477805	0.975431061423351	144.93473423558	-0.176233589645363
ENSG00000065243.14	PKN2	chr1	89149905	89301938	+	152033	3665	198	127	135.740740740741	FALSE	133.64223183186	-0.246919802907391	0.110835533780333	0.346328152810107	133.64223183186	-0.0552815850873859	0.719635096625274	0.860696685847236	133.64223183186	-0.0378566423979988	0.805786328264831	0.876403587877758	133.64223183186	-0.142878727312227	0.351534501570825	0.490844685882833	133.64223183186	-0.0663746229572216	0.66761037403773	0.862552400044635	133.64223183186	-0.0516010648818097	0.738875830840636	0.85523650291128	133.64223183186	-0.0255034742266585	0.868254928395863	0.925430405868495	133.64223183186	-0.190966657000499	0.224877304229148	0.362132381640074	133.64223183186	0.18054517995017	0.247485531035605	0.998625307316004	133.64223183186	0.00368052020557618
ENSG00000137947.7	GTF2B	chr1	89318615	89357627	-	39012	1295	81	46	47.962962962963	FALSE	46.9091563164592	0.309225502526202	0.196845587118177	0.473260250847434	46.9091563164592	0.409711169891118	0.0876427771918672	0.267534770912721	46.9091563164592	-0.0642090981864816	0.798080777860978	0.870245691793166	46.9091563164592	0.704996221155919	0.00241855619374606	0.00935624307254135	46.9091563164592	0.243517799498632	0.318590915846225	0.625520663242478	46.9091563164592	0.394525006251295	0.102568776497932	0.254233235135459	46.9091563164592	0.0302034980544469	0.903155014102875	0.94528097235785	46.9091563164592	0.437585401780861	0.070699766454663	0.151163542611416	46.9091563164592	-0.0657077030275695	0.779633630397387	NA	46.9091563164592	-0.0151861636398236
ENSG00000137944.12	CCBL2	chr1	89401456	89458636	-	57180	672	45	22	24.8888888888889	FALSE	24.4287736690555	-0.157556323172243	0.634039254966972	0.821321054185069	24.4287736690555	-0.378168828830672	0.26890488173042	0.517574086179849	24.4287736690555	0.0713613651679391	0.827833187224839	0.890095059890157	24.4287736690555	0.103595681306325	0.748422737539154	0.833487506856551	24.4287736690555	-0.304933603165184	0.371113845449685	0.671949231486668	24.4287736690555	0.252593594057471	0.43668422783974	0.638114791742136	24.4287736690555	0.00405466416423607	0.990188573592902	0.994360616998108	24.4287736690555	0.212620115118523	0.516289769867989	0.654892876140543	24.4287736690555	-0.147377279992941	0.666848049703874	NA	24.4287736690555	0.630762422888143
ENSG00000213516.5	RBMXL1	chr1	89445139	89458643	-	13504	3432	197	121	127.111111111111	FALSE	124.543292422077	-0.0255885229338293	0.857957385439875	0.933603885258233	124.543292422077	0.21054744157644	0.13635458500945	0.34713537896331	124.543292422077	0.162699825332476	0.252572028397672	0.390798370945798	124.543292422077	0.54259373107167	6.7089599911169e-05	0.000424614091745475	124.543292422077	0.177200172671404	0.213131249912193	0.517598415771639	124.543292422077	-0.0409030129888156	0.779268260562803	0.880205639171357	124.543292422077	-0.192639253382168	0.190573132361305	0.332899281410631	124.543292422077	0.205577676173186	0.151349452929972	0.269702006982501	124.543292422077	0.202788695605233	0.150847930111157	0.975431061423351	124.543292422077	-0.251450454565255
ENSG00000117226.7	GBP3	chr1	89472349	89488577	-	16228	2246	127	79	83.1851851851852	FALSE	81.533026942427	-0.0267075408506369	0.885669430710355	0.946603146655306	81.533026942427	-0.271696715740335	0.156107923563724	0.375659514741405	81.533026942427	-0.483035637015416	0.0137046834343499	0.0409481563542816	81.533026942427	0.379272578121556	0.0353557653706475	0.0853262713426328	81.533026942427	-0.0421781285197865	0.822808534560538	0.935091013953823	81.533026942427	0.0809066388215143	0.665201014727804	0.810166696391346	81.533026942427	-0.193863289591521	0.308315752625402	0.461694266570496	81.533026942427	0.131382585726319	0.48270249245448	0.626174357365038	81.533026942427	-0.0154705876691496	0.934116620840947	0.998625307316004	81.533026942427	0.35260335456185
ENSG00000117228.9	GBP1	chr1	89518002	89531043	-	13041	6143	381	230	227.518518518519	FALSE	222.020121256529	-0.192796284187457	0.225358385720567	0.506988811722725	222.020121256529	-0.686335774746378	2.54929336499209e-05	0.000765304758152694	222.020121256529	-1.32749318068185	4.50690408009237e-15	2.45695396660741e-13	222.020121256529	0.0374478854177252	0.812383765979046	0.876936021231244	222.020121256529	-0.258392168312124	0.106904387419275	0.365045035996987	222.020121256529	-0.440919190669082	0.00639436303930259	0.039678266604159	222.020121256529	-1.35690795315225	1.24423538212235e-15	9.36972508944003e-14	222.020121256529	-0.429755306696532	0.00800130041214455	0.0273249636673007	222.020121256529	-0.065595884124667	0.68309169429035	0.998625307316004	222.020121256529	0.245416584077295
ENSG00000162645.8	GBP2	chr1	89571815	89616139	-	44324	2503	151	99	92.7037037037037	FALSE	91.1282965679958	0.033128328938976	0.874819689080604	0.941005659989136	91.1282965679958	-0.467711275902005	0.0318417524402354	0.141120105827397	91.1282965679958	-0.242520232891048	0.259223079242263	0.397786388194103	91.1282965679958	0.0751856917808836	0.719813699621918	0.813077980369527	91.1282965679958	-0.190429758215195	0.374824636732297	0.67542802340628	91.1282965679958	-0.462600888680105	0.0345735088327281	0.124131462614853	91.1282965679958	-0.717365858469969	0.00123189936362934	0.00634956945777858	91.1282965679958	0.227572573125163	0.280521333083959	0.425813557530588	91.1282965679958	-0.223558087154171	0.294121797193699	0.998625307316004	91.1282965679958	0.00511038722190003
ENSG00000162654.8	GBP4	chr1	89646831	89664615	-	17784	5990	456	186	221.851851851852	FALSE	213.762786990438	-0.201682558139145	0.0574770751074906	0.249327447131383	213.762786990438	-1.02576725950426	2.93158809035791e-19	2.89445464121337e-16	213.762786990438	-2.6934495904916	9.20126839701416e-76	2.72541569919559e-72	213.762786990438	-0.0551305441684434	0.599925093739119	0.719133196137301	213.762786990438	-0.258661743992151	0.0162438714578078	0.128647987320927	213.762786990438	-1.28735626905138	1.82442596559008e-27	5.40394971007781e-24	213.762786990438	-2.94294413960148	1.90244439762411e-82	1.69051209172879e-78	213.762786990438	-1.57291960762649	6.67490458727804e-37	2.57883487663272e-34	213.762786990438	-0.0569791858530062	0.598410822424025	0.998625307316004	213.762786990438	-0.261589009547115
ENSG00000171488.10	LRRC8C	chr1	90098631	90235462	+	136831	685	43	25	25.3703703703704	FALSE	24.6396645891255	0.126330815057855	0.669573643002924	0.84322849387493	24.6396645891255	-0.28252193477962	0.362285119763924	0.609152535078033	24.6396645891255	-0.635067094138644	0.049341116091697	0.11352800559058	24.6396645891255	-0.0542941324172654	0.856254748427264	0.906010918614512	24.6396645891255	-0.169167670493335	0.582738118071928	0.81617181594441	24.6396645891255	-0.391439908463075	0.215747172161534	0.412631407300283	24.6396645891255	-0.485967625976213	0.125248409437333	0.245198802877317	24.6396645891255	-0.730556045749851	0.0278347637346525	0.0733945728623508	24.6396645891255	-0.295498485551189	0.328258324986467	NA	24.6396645891255	-0.108917973683455
ENSG00000171492.10	LRRC8D	chr1	90286573	90402170	+	115597	7074	395	256	262	FALSE	256.09677428444	0.0233461517088893	0.866799695711532	0.938153353550366	256.09677428444	0.303674814937444	0.0280806559273737	0.129122235000741	256.09677428444	-0.054387000349345	0.698875504293498	0.800181385279219	256.09677428444	-0.0387532909157777	0.781023339038184	0.856705763571572	256.09677428444	0.0104279709224915	0.940748470406794	0.97953800504559	256.09677428444	-0.0254238796387373	0.856711401589954	0.924886103089337	256.09677428444	0.148083391708856	0.287554586580225	0.439719507202182	256.09677428444	-0.126611782312474	0.372741313047174	0.52234336977404	256.09677428444	-0.0129181807863978	0.926180739349751	0.998625307316004	256.09677428444	-0.329098694576181
ENSG00000162664.12	ZNF326	chr1	90460671	90501090	+	40419	3461	177	129	128.185185185185	FALSE	125.580751183518	0.0963617229184171	0.524547239403232	0.753374295997596	125.580751183518	-0.231619490653147	0.1389080179889	0.351462599045946	125.580751183518	-0.549869159461503	0.00065402260853704	0.00344049426362748	125.580751183518	-0.202200642956679	0.190232412782284	0.312574929730654	125.580751183518	0.0248553805418473	0.871653740765322	0.954233724336658	125.580751183518	-0.128852540751203	0.409205348250647	0.614528730991005	125.580751183518	-0.211819422131566	0.175439801632473	0.314152624678708	125.580751183518	0.025208519929781	0.870804514097275	0.92239467305619	125.580751183518	-0.0715063423765698	0.637321790539186	0.998625307316004	125.580751183518	0.102766949901944
ENSG00000122482.16	ZNF644	chr1	91380859	91487829	-	106970	4036	238	143	149.481481481481	FALSE	146.328016184335	-0.145921042037855	0.303952093962451	0.587411550010947	146.328016184335	-0.179781691927466	0.21093370212135	0.44754202228429	146.328016184335	-0.178942012247513	0.213662423993822	0.344574283050653	146.328016184335	0.187438457412456	0.175365326916195	0.294295806416867	146.328016184335	-0.158193461719289	0.271718647150209	0.581559338210328	146.328016184335	-0.118905693105435	0.408515798381237	0.614059228548943	146.328016184335	-0.0769546133857546	0.58932444074539	0.722408191538631	146.328016184335	0.109415805705682	0.440737899526654	0.587782826833836	146.328016184335	-0.0122724196814337	0.932239108022611	0.998625307316004	146.328016184335	0.0608759988220311
ENSG00000097046.8	CDC7	chr1	91966408	91991321	+	24913	1095	78	40	40.5555555555556	FALSE	39.4924963195071	0.024701546588573	0.936209767092493	0.97107038524383	39.4924963195071	-0.182838730910795	0.561012019819603	0.766121531906715	39.4924963195071	-0.393017238662076	0.218285568390645	0.350503353942766	39.4924963195071	-0.27726200637659	0.376424445167628	0.51690737440265	39.4924963195071	-0.196396812711023	0.53359926899901	0.788475799111589	39.4924963195071	-0.265289646731107	0.40368196009287	0.610401025960474	39.4924963195071	0.166378583913739	0.589615804041881	0.722665659960849	39.4924963195071	-0.175732792564259	0.57945438275251	0.706702119837881	39.4924963195071	-0.221098359299596	0.480301151443244	NA	39.4924963195071	-0.082450915820312
ENSG00000069702.6	TGFBR3	chr1	92145902	92371892	-	225990	3650	267	127	135.185185185185	FALSE	132.595423564608	0.133775805644711	0.374351135123059	0.64742782925331	132.595423564608	0.0113061972038173	0.941198790483543	0.972312059660975	132.595423564608	-1.12657161195497	7.89957901953323e-11	2.26437610217975e-09	132.595423564608	0.759386451209148	1.63360862703514e-07	1.92593236253541e-06	132.595423564608	0.00780531868249303	0.959521929620145	0.985143955377766	132.595423564608	-0.404488204245514	0.0115372991891054	0.0597786825623269	132.595423564608	-1.32256073973405	9.68369405351723e-14	5.66113851049698e-12	132.595423564608	0.959013154464405	4.47433264498645e-11	1.48829039690271e-09	132.595423564608	-0.125970486962218	0.4043671252102	0.998625307316004	132.595423564608	-0.415794401449331
ENSG00000122484.8	RPAP2	chr1	92764522	92867613	+	103091	1494	81	52	55.3333333333333	FALSE	54.42249213838	-0.161425499460252	0.450078107757602	0.704602878276262	54.42249213838	-0.26828383320336	0.21943664717694	0.458587499250773	54.42249213838	0.277213250876925	0.182742806201556	0.307781003773128	54.42249213838	-0.182257456735445	0.393524624766455	0.534279574587428	54.42249213838	-0.258432168174918	0.238472054605619	0.545115973830705	54.42249213838	0.129296894464117	0.541422528839454	0.719898337762589	54.42249213838	-0.0192245736038824	0.928168681547211	0.959852872732659	54.42249213838	-0.163597544755384	0.455694198117113	0.601180458994883	54.42249213838	-0.0970066687146659	0.659640176946915	NA	54.42249213838	0.397580727667477
ENSG00000067208.10	EVI5	chr1	92974253	93257961	-	283708	1843	97	73	68.2592592592593	FALSE	66.5564833551363	-0.151250338787871	0.460756074426579	0.710442213665552	66.5564833551363	0.0460482773252745	0.821146850893691	0.916326876433673	66.5564833551363	0.0182271771622358	0.928948125078502	0.95776952350081	66.5564833551363	0.0415088534233675	0.836786690712611	0.892197076939128	66.5564833551363	-0.0499025480198721	0.808594274764489	0.930303741221869	66.5564833551363	-0.126476085110748	0.543239618217265	0.721558631910107	66.5564833551363	-0.0546653807981036	0.79021475185354	0.872387661196491	66.5564833551363	-0.1090821374036	0.601646842735851	0.725503303643746	66.5564833551363	0.101347790767999	0.623961450524688	0.998625307316004	66.5564833551363	-0.172524362436022
ENSG00000122406.8	RPL5	chr1	93297582	93307481	+	9899	43779	2300	1569	1621.44444444444	TRUE	1591.21309774283	-0.237320911775924	0.0164825592316274	0.12637102789667	1591.21309774283	-0.442635263014799	8.59109782387321e-06	0.000323476674842955	1591.21309774283	-0.130091156463756	0.188833393527411	0.315408559188829	1591.21309774283	-0.538009109189521	6.14925412974288e-08	8.09457846096348e-07	1591.21309774283	-0.47778501959283	1.60052177949544e-06	0.000258586118774482	1591.21309774283	-0.217202756908394	0.0285759383003658	0.109497967976305	1591.21309774283	-0.309109842481339	0.00184701039846065	0.00892470603628132	1591.21309774283	-0.379540206686885	0.000138023465491199	0.000930558812105308	1591.21309774283	-0.240464107816906	0.0159065094964099	0.67360609780449	1591.21309774283	0.225432506106405
ENSG00000143033.13	MTF2	chr1	93544792	93604638	+	59846	3584	197	130	132.740740740741	FALSE	130.314003199629	0.108286061455616	0.462930089371715	0.712124098204558	130.314003199629	-0.0361645518837198	0.810355307820751	0.90920909369414	130.314003199629	0.0143414545405717	0.923962252712552	0.953802111710471	130.314003199629	0.0913205161282722	0.535578864806835	0.664795962915939	130.314003199629	0.221482498093243	0.134533928086872	0.412386246612137	130.314003199629	0.0934720711355068	0.533139972936877	0.714161453217697	130.314003199629	0.156365579714582	0.291958386652671	0.444400139797897	130.314003199629	0.190024921366922	0.203914855747171	0.336738042774459	130.314003199629	0.113196436637627	0.436093278408679	0.998625307316004	130.314003199629	0.129636623019227
ENSG00000117500.8	TMED5	chr1	93615299	93646285	-	30986	4117	274	153	152.481481481481	FALSE	150.309166904154	-0.112504788135658	0.481740855330828	0.724881045191167	150.309166904154	-0.837687788877767	8.2142108749521e-07	4.96540665543023e-05	150.309166904154	-0.605264403403569	0.000285387521598743	0.00169063567795095	150.309166904154	-0.281806101159446	0.0805407860733872	0.16169915175545	150.309166904154	0.0249771028872428	0.876011221981891	0.956502111955122	150.309166904154	0.0147228841857502	0.926914774469776	0.964130245339861	150.309166904154	0.0699092605254871	0.661074200939061	0.779602567955474	150.309166904154	0.222564334958234	0.162103988779516	0.283498532630344	150.309166904154	0.137481891022901	0.390500324830234	0.998625307316004	150.309166904154	0.852410673063518
ENSG00000122483.13	CCDC18	chr1	93645476	93744287	+	98811	2196	120	79	81.3333333333333	FALSE	80.4938801473968	-0.176281401547529	0.310644592943226	0.593249054995381	80.4938801473968	-0.491615136399293	0.00660522896560089	0.0488709946613901	80.4938801473968	-0.482715422046528	0.00771155044371345	0.0258584291482407	80.4938801473968	-0.954072986142941	3.70469939235788e-07	4.01462912201124e-06	80.4938801473968	-0.0518313548546518	0.7662145120093	0.910359961721439	80.4938801473968	-0.0712047989967267	0.684313559891657	0.821984789995032	80.4938801473968	-0.26848581502455	0.129656114580058	0.251830433695824	80.4938801473968	-0.299590629953246	0.0960972185433062	0.191418938349208	80.4938801473968	0.124450046692878	0.477703305809833	0.998625307316004	80.4938801473968	0.420410337402566
ENSG00000117505.8	DR1	chr1	93811445	93835055	+	23610	5583	261	200	206.777777777778	FALSE	203.064461853552	-0.207330334495507	0.07279969025457	0.281014111518697	203.064461853552	-0.251709950904032	0.0317240901557038	0.140809323238554	203.064461853552	-0.293589147330166	0.0127128609435076	0.0386634526996047	203.064461853552	0.00755117585236808	0.946897798174658	0.966919539712711	203.064461853552	-0.0316253084523155	0.783983782628775	0.918333758560414	203.064461853552	-0.166596764035625	0.154730971359426	0.332995740251843	203.064461853552	-0.327450201615772	0.00554755188273003	0.0218993985028605	203.064461853552	-0.149471345715896	0.203647550561159	0.336359132767	203.064461853552	0.175705026043191	0.130809861086559	0.975431061423351	203.064461853552	0.0851131868684072
ENSG00000137942.12	FNBP1L	chr1	93913688	94020218	+	106530	743	42	29	27.5185185185185	FALSE	26.8014859913364	0.241779851476731	0.442476216623045	0.698559631997145	26.8014859913364	-0.12853220105122	0.693620042461299	0.846367236693243	26.8014859913364	-0.245902481985793	0.456224291313787	0.600327121666565	26.8014859913364	-0.0953786032560055	0.766863873906733	0.847240132231161	26.8014859913364	0.0987939254772318	0.758563405413227	0.907871948545525	26.8014859913364	-0.282336819330436	0.39635354822372	0.604509267494772	26.8014859913364	-0.152912414894513	0.640142816477657	0.764120590387414	26.8014859913364	-0.790064241279505	0.0256844400821821	0.0689106082639704	26.8014859913364	-0.1429859259995	0.648306778690331	NA	26.8014859913364	-0.153804618279216
ENSG00000137936.12	BCAR3	chr1	94027347	94312706	-	285359	3949	236	137	146.259259259259	FALSE	143.396084651324	0.0318924688671711	0.841059274920222	0.927461190109894	143.396084651324	-0.0536419175257487	0.739389217568444	0.871612176613584	143.396084651324	0.0766843265976845	0.631637954065874	0.746502730994182	143.396084651324	0.550130992567762	0.000364450604490326	0.00184740905390818	143.396084651324	-0.190600562590006	0.24334291322389	0.550635377363759	143.396084651324	0.410032801879991	0.00911342207369531	0.050964045655668	143.396084651324	0.0200480500482782	0.900592756754025	0.943993729867737	143.396084651324	-0.00556209784528347	0.972657999331811	0.98361659065238	143.396084651324	-0.222493031457177	0.16934453130715	0.985126099538007	143.396084651324	0.46367471940574
ENSG00000067334.9	DNTTIP2	chr1	94333373	94345474	-	12101	4863	263	177	180.111111111111	FALSE	176.929173230641	-0.353347120389971	0.0144758069025796	0.116831989224634	176.929173230641	-0.496172978986193	0.000740766329427782	0.0104586368757124	176.929173230641	-0.537419268957931	0.00027257951725439	0.00162341929646281	176.929173230641	-0.163079929038163	0.253046706764363	0.386286383148622	176.929173230641	-0.402046242258464	0.00604728020605797	0.0719375514250962	176.929173230641	-0.256161952875082	0.0780413107428015	0.213574095245006	176.929173230641	-0.526459047087551	0.000356414953189658	0.00227849156405993	176.929173230641	-0.020983988110619	0.883989122882096	0.929532101971707	176.929173230641	-0.0486991218684926	0.742821639333034	0.998625307316004	176.929173230641	0.240011026111112
ENSG00000023909.5	GCLM	chr1	94350761	94374966	-	24205	12057	667	437	446.555555555556	FALSE	439.985354820982	0.0637656218783408	0.568535049173785	0.781588371421538	439.985354820982	0.148651701458125	0.18449306293519	0.414934284293115	439.985354820982	-0.162771310605984	0.152414726141695	0.268455353120932	439.985354820982	-0.188376888346153	0.0954150260994561	0.184638049198556	439.985354820982	0.130707567308683	0.244282030039008	0.551239657618928	439.985354820982	0.411397280541237	0.000213919759892812	0.00309237364319756	439.985354820982	0.451181807379088	4.60634635686426e-05	0.000403668577190294	439.985354820982	0.307039091713639	0.00605985439261279	0.0218184937946346	439.985354820982	0.0669419454303426	0.547828404886939	0.998625307316004	439.985354820982	0.262745579083113
ENSG00000137962.8	ARHGAP29	chr1	94614544	94740624	-	126080	4386	258	163	162.444444444444	FALSE	159.949365059911	-0.508757840708326	0.00223747326325112	0.0381615881329165	159.949365059911	0.264596902014617	0.0983151889849261	0.285406327775254	159.949365059911	0.475219113325127	0.00272862102365422	0.0112356470881332	159.949365059911	0.0632307443423706	0.693558860527737	0.793378480258686	159.949365059911	-0.256410487865803	0.120886060003037	0.390757922585299	159.949365059911	0.098019737632493	0.545309204212288	0.722434045089689	159.949365059911	0.359785422701451	0.0239987481698923	0.0687247425838424	159.949365059911	-0.725528565553793	2.72547850616636e-05	0.000232201361512888	159.949365059911	0.252347352842522	0.136425000862525	0.975431061423351	159.949365059911	-0.166577164382124
ENSG00000117528.7	ABCD3	chr1	94883933	94984222	+	100289	1869	133	64	69.2222222222222	FALSE	67.8631921861659	-0.212744087221874	0.304801710915732	0.587863717819257	67.8631921861659	-0.204085746247417	0.329365997716794	0.577495314860188	67.8631921861659	0.217123849690796	0.283811634203816	0.425215002787913	67.8631921861659	-0.422762340318031	0.0447879872648291	0.102556010195396	67.8631921861659	-0.107436867853432	0.605829085464713	0.829491102224876	67.8631921861659	-0.016493340404415	0.936553722003718	0.96769957834012	67.8631921861659	0.342183218386862	0.0882765135498773	0.1876615070345	67.8631921861659	-0.237661462846553	0.263591323576419	0.406291847580235	67.8631921861659	0.105307219368442	0.615925933696333	0.998625307316004	67.8631921861659	0.187592405843002
ENSG00000117525.9	F3	chr1	94994781	95007356	-	12575	17543	1473	624	649.740740740741	FALSE	633.986667390011	-0.767195227164928	1.96725002935434e-05	0.00156080212150381	633.986667390011	-0.49430374436953	0.00587984626996042	0.0450542374872288	633.986667390011	-1.54384433872612	2.45665021872405e-17	1.86579434560529e-15	633.986667390011	-0.86720592724749	1.42796388471964e-06	1.38223170801947e-05	633.986667390011	-0.560904031074191	0.00179287826010669	0.0335079784140862	633.986667390011	-0.682195360392261	0.000150134886358885	0.00238231892890188	633.986667390011	-0.875868698211754	1.18357909129003e-06	1.66941012781003e-05	633.986667390011	-1.04802238929046	7.06880575657901e-09	1.50631673748108e-07	633.986667390011	0.206291196090737	0.253580967485967	0.998625307316004	633.986667390011	-0.187891616022731
ENSG00000117519.11	CNN3	chr1	95362507	95392834	-	30327	22712	1340	867	841.185185185185	FALSE	822.750577734545	0.299557058986332	0.471298171942447	0.717561316284425	822.750577734545	0.566451064207373	0.173058021500729	0.399115904244868	822.750577734545	-0.371080153229526	0.372950262044999	0.518888297950098	822.750577734545	0.267750963033614	0.519653905247247	0.651473561234062	822.750577734545	0.455914635168567	0.272914458425049	0.58282092707642	822.750577734545	-0.00160889759878349	0.996915623940941	0.998263718090962	822.750577734545	0.468143400130603	0.260241148756448	0.410965496330157	822.750577734545	0.0128767992232927	0.975320343622824	0.985523831411464	822.750577734545	0.156357576182234	0.70671680325658	0.998625307316004	822.750577734545	-0.568059961806156
ENSG00000152078.5	TMEM56	chr1	95582894	95663163	+	80269	1811	104	64	67.0740740740741	FALSE	65.8736791713716	-0.331858381164848	0.111444881905067	0.347351533008917	65.8736791713716	0.0357384237011043	0.860908095046143	0.936356099458999	65.8736791713716	0.336537123878017	0.0918036401738565	0.183389453143937	65.8736791713716	-0.300804297073982	0.146923433672028	0.256949740525416	65.8736791713716	-0.179504207198867	0.389377478524492	0.68596516141329	65.8736791713716	-0.175974039305341	0.40010775836814	0.607062469823192	65.8736791713716	0.353601963728702	0.0759816733391485	0.167870002310212	65.8736791713716	-0.42876591471545	0.0471865934637445	0.110574912847794	65.8736791713716	0.152354173965981	0.473440542184526	0.998625307316004	65.8736791713716	-0.211712463006446
ENSG00000188641.8	DPYD	chr1	97543299	98386605	-	843306	1151	60	41	42.6296296296296	FALSE	41.9647005085546	-0.132720203225667	0.566367532955024	0.780391052541222	41.9647005085546	-0.387868068247471	0.105580014726625	0.296543069875619	41.9647005085546	-0.614025060429614	0.0126189806176946	0.038480529090197	41.9647005085546	-0.431355573491789	0.0691391354736695	0.143715779509936	41.9647005085546	-0.286237708973175	0.229510639976608	0.534671302168089	41.9647005085546	-0.351219983817377	0.144407596614707	0.318493074281901	41.9647005085546	-0.330657373092689	0.165410503251338	0.301381532067129	41.9647005085546	-0.430346801487559	0.0783265351775781	0.16380550519839	41.9647005085546	-0.153517505747508	0.520093073847128	NA	41.9647005085546	0.0366480844300938
ENSG00000162627.12	SNX7	chr1	99127236	99226056	+	98820	6055	322	209	224.259259259259	FALSE	219.785858430922	-0.0610987987350948	0.666207067459122	0.841255648918823	219.785858430922	0.066851254786338	0.636858331482558	0.815318129023773	219.785858430922	-0.0164268898345439	0.908094715905244	0.944222986839925	219.785858430922	-0.18615841851084	0.191002090159284	0.313607873256039	219.785858430922	0.132533942469312	0.348502177577466	0.650788143655015	219.785858430922	-0.0556330162950184	0.697365228538633	0.830223395068903	219.785858430922	0.15506279019556	0.271616848425597	0.423287849019617	219.785858430922	-0.438987025400531	0.00286519874361401	0.0118419330398856	219.785858430922	0.193632741204407	0.169689798437052	0.985126099538007	219.785858430922	-0.122484271081356
ENSG00000162688.11	AGL	chr1	100315640	100389579	+	73939	1374	84	46	50.8888888888889	FALSE	49.9660964139592	0.0173640562602518	0.939007101981297	0.972496166457553	49.9660964139592	0.153685891850357	0.497298723554021	0.721122855309189	49.9660964139592	0.700981589114632	0.00121895802237193	0.00577688585962506	49.9660964139592	0.0989832989278493	0.659486217460576	0.766339025546578	49.9660964139592	-0.166179124915822	0.479633095952027	0.752475227865415	49.9660964139592	0.21341585274517	0.346635585046972	0.559250483229842	49.9660964139592	0.41107841276801	0.0633851640846723	0.146106502738365	49.9660964139592	0.0571626973382069	0.805285112078758	0.87639479558259	49.9660964139592	-0.183543181176074	0.429532718384912	NA	49.9660964139592	0.0597299608948124
ENSG00000117620.8	SLC35A3	chr1	100435345	100492535	+	57190	1458	80	53	54	FALSE	52.911345977343	-0.4125946606481	0.0508088979901255	0.233206543150958	52.911345977343	-0.0462400017099845	0.822097436007025	0.916799607649181	52.911345977343	-0.169458933072948	0.416747496331504	0.562638855301548	52.911345977343	-0.193757649731594	0.346483836031763	0.486160645346321	52.911345977343	-0.0805722469013806	0.697458852571403	0.879792432688436	52.911345977343	-0.228595208002691	0.279425045431669	0.487717728089925	52.911345977343	0.0914793286456055	0.652310761886776	0.773270201457563	52.911345977343	-0.218351517936948	0.304599171497232	0.451487612664621	52.911345977343	0.332022413746719	0.120465089055664	NA	52.911345977343	-0.182355206292707
ENSG00000156875.9	HIAT1	chr1	100503653	100548933	+	45280	2144	157	79	79.4074074074074	FALSE	77.3522414859006	-0.597020105439102	0.0192672091933601	0.138182744868602	77.3522414859006	0.036199946385204	0.884550598113415	0.945763382681174	77.3522414859006	-0.727363811428554	0.00496875184497269	0.018183744337314	77.3522414859006	-0.124132531398083	0.618639392546582	0.733901167899429	77.3522414859006	-0.448342476456545	0.0789351603311438	0.310080872116868	77.3522414859006	-0.501648368982241	0.0504289462063693	0.159100263991768	77.3522414859006	-0.559864476602537	0.028987288977374	0.0796231993363046	77.3522414859006	-0.263882498532893	0.298951519206507	0.445266637511208	77.3522414859006	0.148677628982557	0.568400239546309	0.998625307316004	77.3522414859006	-0.537848315367445
ENSG00000156876.8	SASS6	chr1	100549119	100598511	-	49392	1763	92	66	65.2962962962963	FALSE	64.5793822155868	0.0121968340915713	0.948578089897055	0.97761177886325	64.5793822155868	-0.533437236015262	0.00825267996535218	0.0572916516969684	64.5793822155868	-0.613973854549101	0.00266113992699519	0.0110241908584052	64.5793822155868	-0.54738113047242	0.00597804459277103	0.0200434812493259	64.5793822155868	0.0911679329920917	0.631999391121779	0.844249336967548	64.5793822155868	-0.092611002681253	0.633506585949723	0.788272310725538	64.5793822155868	-0.0223517463850132	0.907173272907906	0.948035011532359	64.5793822155868	0.00688623848005156	0.971623078214817	0.983171528722154	64.5793822155868	0.0789710989005204	0.675043553935386	0.998625307316004	64.5793822155868	0.440826233334009
ENSG00000137992.10	DBT	chr1	100652475	100715390	-	62915	2168	123	80	80.2962962962963	FALSE	78.9795256955617	0.119342175521049	0.491442434500765	0.733074489894875	78.9795256955617	-0.0938715272745358	0.599964788245712	0.793464370940824	78.9795256955617	0.213411286326412	0.220117132423466	0.352441153886169	78.9795256955617	-0.117052841772243	0.508167841178707	0.641417533624146	78.9795256955617	-0.116780802227086	0.517058804296631	0.777557037566401	78.9795256955617	-0.01443309215968	0.935708943730933	0.967273837856971	78.9795256955617	0.317150838254027	0.065631505351147	0.150154880677212	78.9795256955617	0.183361554110447	0.298999102636662	0.445266637511208	78.9795256955617	-0.236122977748135	0.181137892766672	0.998625307316004	78.9795256955617	0.0794384351148557
ENSG00000137996.8	RTCA	chr1	100731763	100758325	+	26562	2841	136	106	105.222222222222	FALSE	103.212810043605	-0.153043300985008	0.373779590208372	0.64681702796331	103.212810043605	-0.0964747175897506	0.576751823573613	0.777708640592327	103.212810043605	-0.107165167365545	0.536035789943069	0.669837439099157	103.212810043605	-0.175460460140954	0.307700597639661	0.444806818061823	103.212810043605	-0.187978585277252	0.281614884871452	0.591730874194306	103.212810043605	-0.269310613382709	0.126551399824587	0.292314982802516	103.212810043605	-0.102575336211433	0.553262959881331	0.693314717459528	103.212810043605	-0.190153017805292	0.2800580551515	0.425328299107201	103.212810043605	-0.0349352842922439	0.841874800939957	0.998625307316004	103.212810043605	-0.172835895792958
ENSG00000162694.9	EXTL2	chr1	101337943	101361554	-	23611	1592	79	60	58.962962962963	FALSE	58.2069033010917	0.122735355106321	0.599711285355305	0.798596505569795	58.2069033010917	-0.00687665468675309	0.976964155883942	0.988762339055701	58.2069033010917	0.00872216563885006	0.970783159046173	0.983173443336532	58.2069033010917	0.0114303344166253	0.961247807699347	0.976076793419769	58.2069033010917	0.293575742047844	0.208872490637014	0.513044037128177	58.2069033010917	0.115472078293794	0.62644578576915	0.783806991318596	58.2069033010917	0.20057726477336	0.392621832682193	0.547268643955132	58.2069033010917	0.268476439248912	0.254581311801781	0.395906464240571	58.2069033010917	0.170840386941523	0.456698496490771	0.998625307316004	58.2069033010917	0.122348732980547
ENSG00000162695.7	SLC30A7	chr1	101361632	101447309	+	85677	2156	113	79	79.8518518518518	FALSE	78.1440889338106	0.173347908393274	0.332467155013057	0.61182942175847	78.1440889338106	0.26509711098193	0.139070724008215	0.351573955487054	78.1440889338106	0.297583271799042	0.0963672200321946	0.190007538860913	78.1440889338106	0.1641960434468	0.357937686565649	0.497607446434467	78.1440889338106	-0.209740699648562	0.264464190880084	0.575423310519203	78.1440889338106	-0.260133135254967	0.170156421922606	0.355009386370902	78.1440889338106	-0.141509750342743	0.446590052692604	0.598472512162961	78.1440889338106	-0.0776688960946826	0.678372523518755	0.7863665177882	78.1440889338106	-0.383088608041836	0.0370180474943926	0.848823539833109	78.1440889338106	-0.525230246236896
ENSG00000117543.15	DPH5	chr1	101455179	101491644	-	36465	2844	148	97	105.333333333333	FALSE	103.311411821191	-0.0506706914233658	0.774249152780447	0.896764594839292	103.311411821191	0.0330875602554761	0.851787034884518	0.932419978268592	103.311411821191	0.0455235710729769	0.79714751040929	0.870005622653346	103.311411821191	-0.103721935560648	0.557824417142285	0.683135029041668	103.311411821191	-0.0263004181594214	0.882744151176793	0.958709250795555	103.311411821191	-0.0198816516115915	0.911410193733035	0.955609555340619	103.311411821191	-0.0582314430804345	0.744023760589267	0.840186629422707	103.311411821191	-0.168874051566611	0.352764603058848	0.502833856718147	103.311411821191	0.0243702732639444	0.890855862174291	0.998625307316004	103.311411821191	-0.0529692118670676
ENSG00000185946.11	RNPC3	chr1	104068313	104097861	+	29548	994	56	38	36.8148148148148	FALSE	36.1377186252677	-0.0620188115803051	0.806498025832323	0.911047475819703	36.1377186252677	0.0106427693426178	0.966607611041568	0.984940052382143	36.1377186252677	0.353100499297987	0.151664491575626	0.267499186761954	36.1377186252677	0.0880212744640135	0.723455761474877	0.815919265955801	36.1377186252677	-0.0913252758320649	0.723711292516686	0.892944554696055	36.1377186252677	0.455339846428314	0.0634180646962104	0.186734582388012	36.1377186252677	-0.149610159667555	0.56322554815858	0.701938600411941	36.1377186252677	0.00198345872033582	0.993877820948534	0.996456991644892	36.1377186252677	-0.0293064642517598	0.909267331755188	NA	36.1377186252677	0.444697077085696
ENSG00000198890.6	PRMT6	chr1	107599267	107601916	+	2649	791	55	29	29.2962962962963	FALSE	28.5648878732337	0.348180808642187	0.213984514740683	0.494529622362994	28.5648878732337	0.0651924017235467	0.821848755494191	0.916799607649181	28.5648878732337	-0.315598772899698	0.29506009948636	0.437497390066913	28.5648878732337	-0.103885122284634	0.720431484612891	0.813541005498812	28.5648878732337	0.185641439224896	0.518434383706104	0.778331069726711	28.5648878732337	-0.0886558802624716	0.764548217586589	0.870371582686043	28.5648878732337	-0.109835258853975	0.709182345821092	0.815023692968979	28.5648878732337	-0.673679998297793	0.0352382626686114	0.0879817932209274	28.5648878732337	-0.162539369417291	0.556499746616061	NA	28.5648878732337	-0.153848281986018
ENSG00000134215.11	VAV3	chr1	108113782	108507766	-	393984	463	36	15	17.1481481481481	FALSE	16.9116887396855	0.594234915681777	0.144342245053884	0.405065376635508	16.9116887396855	1.2206912917117	0.00183208999965375	0.0197093846693986	16.9116887396855	1.33774300409799	0.000588642891587706	0.00316053216595067	16.9116887396855	-0.293308833254494	0.511088737648423	0.644646490098494	16.9116887396855	0.641974428221511	0.118243704261636	0.386656899209207	16.9116887396855	0.652253779231979	0.113206246643103	0.271365176064369	16.9116887396855	1.47106397859365	0.000138273846690901	0.00103687881999607	16.9116887396855	-0.35812064123731	0.444490210697772	0.59092459788456	16.9116887396855	0.0477395125397335	0.899619156203619	NA	16.9116887396855	-0.568437512479718
ENSG00000085491.11	SLC25A24	chr1	108676658	108743471	-	66813	11426	687	399	423.185185185185	FALSE	414.277743186593	-0.254827900943922	0.100315591742046	0.32796333635755	414.277743186593	0.255322176279125	0.0967943262870467	0.283786385191368	414.277743186593	-0.00313863913383776	0.983805426564044	0.991383398540863	414.277743186593	-0.250179740237454	0.106379951413823	0.200613804809684	414.277743186593	-0.221872140062486	0.153806108638487	0.439984079041575	414.277743186593	-0.040418358007811	0.794255448652695	0.890535545412119	414.277743186593	0.202280807611901	0.188859623001296	0.331399409555593	414.277743186593	-0.389924589787786	0.012890600748856	0.0400090388593553	414.277743186593	0.0329557608814358	0.83278969991105	0.998625307316004	414.277743186593	-0.295740534286936
ENSG00000162639.11	HENMT1	chr1	109190912	109204148	-	13236	1373	99	45	50.8518518518519	FALSE	49.6914402565575	-0.488717001216549	0.0223004564014206	0.151499889589467	49.6914402565575	-0.109291430810183	0.600937109228153	0.793687151100085	49.6914402565575	-0.148219106820624	0.480101615364237	0.621607256013582	49.6914402565575	-0.833164073627336	0.000162365553460306	0.000920727701370949	49.6914402565575	-0.543220059683779	0.0128610854225843	0.112950631226532	49.6914402565575	-1.1896222204846	5.38604605934821e-07	2.97269598033343e-05	49.6914402565575	-0.834390132099136	0.000202765217933191	0.00143111336501536	49.6914402565575	-1.03597708680298	9.95661503593133e-06	9.66934220866511e-05	49.6914402565575	-0.0545030584672297	0.808499238615714	NA	49.6914402565575	-1.08033078967442
ENSG00000134186.7	PRPF38B	chr1	109234945	109244425	+	9480	10647	531	386	394.333333333333	FALSE	388.866163624424	0.0128700121153946	0.921172858222052	0.962891661941084	388.866163624424	-0.289395016579376	0.02857647817758	0.130689956297466	388.866163624424	-0.039304054510627	0.763999087160344	0.845231061816088	388.866163624424	0.0786739378641571	0.544012918873304	0.67221199723016	388.866163624424	-0.139946084587221	0.287348246512616	0.597420804518274	388.866163624424	0.111130003060205	0.394369214950959	0.603472506294855	388.866163624424	-0.0365724153833151	0.779950576707716	0.865788984962494	388.866163624424	0.261400808390038	0.0444721627103767	0.105663004771232	388.866163624424	-0.152816096702615	0.243317736174658	0.998625307316004	388.866163624424	0.400525019639581
ENSG00000116266.6	STXBP3	chr1	109289296	109352148	+	62852	742	42	29	27.4814814814815	FALSE	27.0833360885342	0.142176896369833	0.607163015035859	0.802745209285619	27.0833360885342	-0.169843798227712	0.555716289775404	0.762521562358316	27.0833360885342	-0.840086763149777	0.00758446424828357	0.0255770585617639	27.0833360885342	-0.305670010731372	0.288824133949725	0.424194590520338	27.0833360885342	0.153554255609422	0.583668724267899	0.816438713989768	27.0833360885342	-0.559569325369795	0.0664925400386378	0.192522877413925	27.0833360885342	0.0718115146934904	0.798545552669708	0.877839017099844	27.0833360885342	0.0196200439972915	0.945457066110456	0.96789533288681	27.0833360885342	0.0113773592395893	0.966828029084869	NA	27.0833360885342	-0.389725527142082
ENSG00000121957.8	GPSM2	chr1	109417972	109477167	+	59195	4124	250	151	152.740740740741	FALSE	150.119063401865	0.44728296915034	0.00749612958546409	0.0814310605090879	150.119063401865	0.334859693911393	0.0477497460317856	0.182417989354448	150.119063401865	0.270915981766276	0.11063366956444	0.211235665610146	150.119063401865	-0.239670151645091	0.166841330538683	0.283266139977725	150.119063401865	0.397319348800095	0.0186553627888843	0.140098962462071	150.119063401865	0.316895960342484	0.0621972614203355	0.183982977690114	150.119063401865	0.366034216348922	0.0302799707753726	0.0822837370978474	150.119063401865	-0.196655708976749	0.264562382677782	0.407223511601381	150.119063401865	-0.0499636203502451	0.760383449177357	0.998625307316004	150.119063401865	-0.0179637335689094
ENSG00000121940.11	CLCC1	chr1	109472130	109506111	-	33981	1559	76	60	57.7407407407407	FALSE	56.7407262300359	0.051744775331993	0.81060813986894	0.912893248889942	56.7407262300359	-0.146500467798681	0.508657754447972	0.729845439371012	56.7407262300359	-0.00267554647956306	0.990261374634406	0.994339184972412	56.7407262300359	-0.356851823532274	0.109646093714006	0.205248617809702	56.7407262300359	-0.169545054435477	0.44698935043477	0.729018825334219	56.7407262300359	0.142716906817063	0.511934754906476	0.698993889382137	56.7407262300359	-0.0579940812507741	0.792114439504605	0.87350817937924	56.7407262300359	-0.027055484169838	0.903019115824466	0.941228608906814	56.7407262300359	-0.22128982976747	0.314952814188485	0.998625307316004	56.7407262300359	0.289217374615744
ENSG00000197780.5	TAF13	chr1	109605108	109618624	-	13516	3848	251	137	142.518518518519	FALSE	139.651256427814	-0.0241749087353554	0.896799202828779	0.952085748666253	139.651256427814	-0.463188569800963	0.0158635148517339	0.0896755822300521	139.651256427814	-0.279542179764629	0.141386439879012	0.253916920195084	139.651256427814	0.138802308610294	0.452782424608512	0.591506119534142	139.651256427814	-0.235638882793352	0.214538779046233	0.518107450324424	139.651256427814	-0.0557240612783169	0.767394173753408	0.871735599888772	139.651256427814	0.216284058798092	0.243668099829474	0.395187942158186	139.651256427814	0.238723279441639	0.200051867890814	0.331962819435626	139.651256427814	-0.211463974057997	0.263492178392893	0.998625307316004	139.651256427814	0.407464508522646
ENSG00000215717.5	TMEM167B	chr1	109632425	109639556	+	7131	4661	245	165	172.62962962963	FALSE	169.265250086923	0.00153358871144092	0.990859686520651	0.99644479721361	169.265250086923	0.0295719627444059	0.82635714912614	0.918335371077399	169.265250086923	0.340776458554304	0.00976554339615159	0.031248332235579	169.265250086923	0.311381606372006	0.0172425964387358	0.0477611321554258	169.265250086923	-0.132384781447817	0.334270275892014	0.638054730583306	169.265250086923	-0.00119016327247955	0.993015454225291	0.996266831460533	169.265250086923	0.0727069388719442	0.588537213045848	0.721841501052506	169.265250086923	0.0400180892208351	0.768930585870918	0.851853532732699	169.265250086923	-0.133918370159258	0.324629960640387	0.998625307316004	169.265250086923	-0.0307621260168854
ENSG00000031698.8	SARS	chr1	109756540	109780791	+	24251	8016	464	289	296.888888888889	FALSE	291.569244637085	-0.0483586175546346	0.751464634658235	0.885729505713367	291.569244637085	0.0786050560343276	0.606670400406929	0.797820508808047	291.569244637085	0.706492612359203	2.34624653751545e-06	2.65589130348564e-05	291.569244637085	0.37925873224733	0.0116460110770956	0.0347037070526731	291.569244637085	-0.0871459177216923	0.5712885125467	0.81094202735864	291.569244637085	0.207899661825681	0.172278792896296	0.357582418717469	291.569244637085	0.325240939369863	0.0316674258735927	0.0852736796127211	291.569244637085	0.276560630773673	0.0693317950035884	0.148848110751845	291.569244637085	-0.0387873001670576	0.800568999494597	0.998625307316004	291.569244637085	0.129294605791353
ENSG00000134222.12	PSRC1	chr1	109822178	109825808	-	3630	2246	133	85	83.1851851851852	FALSE	81.5631786174222	-0.0649296165812166	0.729450304090662	0.875859094983077	81.5631786174222	-0.195115331756341	0.307029548332112	0.557699216369409	81.5631786174222	-0.166444824271222	0.383031206576703	0.529251329752851	81.5631786174222	-1.32017954083183	3.26656441584962e-10	6.52285199982915e-09	81.5631786174222	-0.176196683927022	0.35695554902508	0.65916604502013	81.5631786174222	0.0343230842972711	0.855803191054907	0.924354826268859	81.5631786174222	-0.217524194714547	0.255813630254374	0.407238701925361	81.5631786174222	-1.20901089542021	1.75348232543081e-08	3.41698332100399e-07	81.5631786174222	-0.111267067345805	0.559641084052694	0.998625307316004	81.5631786174222	0.229438416053612
ENSG00000134243.7	SORT1	chr1	109852192	109940573	-	88381	2410	149	85	89.2592592592593	FALSE	87.5178134482661	-0.147789902749296	0.444959624527837	0.701296776082717	87.5178134482661	0.174902121099179	0.358363129047484	0.605978071306555	87.5178134482661	0.561371689259176	0.00251416116297332	0.0105281979708675	87.5178134482661	0.150052762546756	0.426758001006024	0.567520442523127	87.5178134482661	-0.36797026972413	0.0660166609413166	0.283154969922048	87.5178134482661	-0.029024876312037	0.881450530609342	0.940058739197626	87.5178134482661	0.558144888151393	0.00265863360271186	0.0120165911463365	87.5178134482661	0.141611280951844	0.462910954848057	0.607506534452789	87.5178134482661	-0.220180366974834	0.2727563358853	0.998625307316004	87.5178134482661	-0.203926997411216
ENSG00000143106.8	PSMA5	chr1	109941653	109969062	-	27409	4304	276	153	159.407407407407	FALSE	155.654333616507	0.0610603367203379	0.788571271816784	0.90311178262198	155.654333616507	-0.179961465463004	0.433791323538763	0.669161518691302	155.654333616507	-0.7126962488217	0.00235323078740701	0.00997177337954158	155.654333616507	-0.0287418070032398	0.899696920034179	0.935411046372893	155.654333616507	-0.0369107531134702	0.872040421597895	0.954539441527333	155.654333616507	-0.339940363117711	0.142105524063954	0.314664761234063	155.654333616507	-0.19917472893493	0.38673760258559	0.541612959512905	155.654333616507	-0.168708103444847	0.464647298528806	0.609335285526413	155.654333616507	-0.0979710898338081	0.667675221414059	0.998625307316004	155.654333616507	-0.159978897654708
ENSG00000174151.10	CYB561D1	chr1	110036674	110045554	+	8880	1627	86	60	60.2592592592593	FALSE	59.2825990583116	-0.125371508604979	0.520089973794861	0.751037027348877	59.2825990583116	-0.365453917389169	0.0707333395614488	0.23186426162395	59.2825990583116	-0.036169900941094	0.85337825762676	0.908320793334604	59.2825990583116	-0.205397908343984	0.294483833200368	0.430179626296864	59.2825990583116	0.0182085604452961	0.925655248209669	0.977465541959729	59.2825990583116	-0.263922861385577	0.190604995729713	0.380695884930149	59.2825990583116	-0.200211153989498	0.313632912510907	0.467450865577309	59.2825990583116	-0.207724155358733	0.303473639255855	0.450269954654788	59.2825990583116	0.143580069050275	0.462605461849714	0.998625307316004	59.2825990583116	0.101531056003592
ENSG00000065135.7	GNAI3	chr1	110091233	110136975	+	45742	8799	457	311	325.888888888889	FALSE	319.601713403695	0.0348374763442551	0.77670165448015	0.898132292829515	319.601713403695	0.232553443536925	0.0574434020315736	0.204176828181025	319.601713403695	0.324190307616615	0.0078516418945784	0.0262193498215797	319.601713403695	0.114787965031165	0.347605454254538	0.487272766446731	319.601713403695	0.0578585066350166	0.639842328858308	0.848643517444407	319.601713403695	0.152980070232529	0.214626027800916	0.411562303892234	319.601713403695	0.232573819076173	0.0575179011958904	0.136040476451073	319.601713403695	-0.137293595934916	0.274849861017915	0.419209726228148	319.601713403695	0.0230210302907616	0.851230222520274	0.998625307316004	319.601713403695	-0.0795733733043958
ENSG00000116337.11	AMPD2	chr1	110158726	110174673	+	15947	3375	175	129	125	FALSE	122.530055041601	-0.127999816156537	0.465307631406259	0.713498466380676	122.530055041601	-0.0164853527679651	0.925122931018148	0.965813646158157	122.530055041601	-0.0590003616818061	0.737423332345214	0.826759072081219	122.530055041601	0.0612101736553357	0.723813555005995	0.816070605975768	122.530055041601	0.0366930007055082	0.834120388679765	0.939654383089299	122.530055041601	-0.208568635201974	0.242248927131524	0.444478717562868	122.530055041601	-0.458310545159337	0.0112226245884313	0.0380772211121804	122.530055041601	-0.372990897546652	0.0396983379148901	0.0967567071186216	122.530055041601	0.164692816862045	0.347745214387035	0.998625307316004	122.530055041601	-0.192083282434009
ENSG00000168765.11	GSTM4	chr1	110198703	110208118	+	9415	3848	186	141	142.518518518519	FALSE	140.168352637467	0.370102013350799	0.0105500211203542	0.097552016311621	140.168352637467	0.220714397386234	0.134976351556551	0.344952505013378	140.168352637467	0.348523061094847	0.0172567455869973	0.048873342203986	140.168352637467	0.210550945562528	0.149628087854151	0.260653830361103	140.168352637467	0.320557428396794	0.0291512412804856	0.180892409230723	140.168352637467	0.364047151498314	0.0131685870621689	0.0656287518981675	140.168352637467	0.268574863365918	0.0679942349633494	0.154289267590481	140.168352637467	0.388039436781384	0.00843200936951161	0.0285218253739932	140.168352637467	-0.0495445849540049	0.725590621764307	0.998625307316004	140.168352637467	0.14333275411208
ENSG00000134202.6	GSTM3	chr1	110276554	110284384	-	7830	6463	318	239	239.37037037037	FALSE	234.303754708286	-0.0614162987965753	0.66532577583094	0.840620623351874	234.303754708286	0.0489312221179608	0.730530626594452	0.865532686389107	234.303754708286	0.329644656730799	0.0187674042810683	0.0522453491358311	234.303754708286	0.159096036028361	0.25688972184536	0.389986524409223	234.303754708286	-0.0500368169690488	0.726528119760452	0.894006753144322	234.303754708286	-0.0422968346538728	0.767854282960577	0.872079902656913	234.303754708286	0.17227831769348	0.222646000161388	0.368966270847822	234.303754708286	-0.0238914196995634	0.867902236778863	0.920626913695356	234.303754708286	0.0113794818275265	0.936444729855494	0.998625307316004	234.303754708286	-0.0912280567718336
ENSG00000184371.9	CSF1	chr1	110452864	110473614	+	20750	13399	877	480	496.259259259259	FALSE	484.369038540469	0.52264004765761	0.0258251540216444	0.163795174185471	484.369038540469	0.757404380668301	0.0012262101762898	0.0149057505150632	484.369038540469	0.0636054565627138	0.787484408268469	0.863366619601927	484.369038540469	1.13138697366036	1.25935020019052e-06	1.23380219171918e-05	484.369038540469	0.527004884094238	0.0248051465541086	0.163758196344583	484.369038540469	0.576466016923589	0.0140758944555232	0.068611299030049	484.369038540469	0.359510034655442	0.12632294566574	0.246975950535923	484.369038540469	0.723111157712838	0.00205356619927329	0.0089538710729845	484.369038540469	0.00436483643662746	0.98506790319607	0.998726332951763	484.369038540469	-0.180938363744712
ENSG00000168710.13	AHCYL1	chr1	110527308	110566357	+	39049	30747	1453	1117	1138.77777777778	FALSE	1121.75778373243	-0.0353619904997287	0.660975449543844	0.838168665997335	1121.75778373243	0.0554747371017347	0.491952692850204	0.717343555737924	1121.75778373243	0.209519852003019	0.00911989257329551	0.0295696852757848	1121.75778373243	-0.0225346855712893	0.779595881709362	0.855583031448636	1121.75778373243	-0.0618158380175065	0.446117687236356	0.728445749500599	1121.75778373243	0.184358945687582	0.0221113978060095	0.0926801325019815	1121.75778373243	0.0393335708689355	0.626368694290077	0.75293461978474	1121.75778373243	0.162536489701129	0.0442000991734742	0.10515718373641	1121.75778373243	-0.0264538475177778	0.743766212217738	0.998625307316004	1121.75778373243	0.128884208585848
ENSG00000143093.10	STRIP1	chr1	110574199	110617263	+	43064	4409	226	164	163.296296296296	FALSE	160.729549349483	0.340299535853539	0.0162018663247322	0.125618372479906	160.729549349483	0.273782504348414	0.0561999221455757	0.201530471422754	160.729549349483	0.167582955784477	0.246853771570832	0.384225365944721	160.729549349483	0.487794817914682	0.000491922331712482	0.0023782490966252	160.729549349483	0.661803830453556	2.29153057240904e-06	0.000339375677773779	160.729549349483	0.255409142394795	0.0768786497513882	0.211499591854748	160.729549349483	0.183283596584993	0.204429769861021	0.348334215721003	160.729549349483	0.334429368340151	0.0203846310316479	0.0577792125509484	160.729549349483	0.321504294600017	0.0171639927808382	0.714884609749185	160.729549349483	-0.0183733619536191
ENSG00000162775.10	RBM15	chr1	110881128	110889299	+	8171	2653	150	98	98.2592592592593	TRUE	96.8884471620281	-0.205619824264452	0.214994493638829	0.494932919812081	96.8884471620281	-0.148227335036328	0.373987158353274	0.618854727956647	96.8884471620281	-0.158582023786163	0.342870104238892	0.487681059275092	96.8884471620281	-0.0616364703016243	0.705794684778546	0.802383471973422	96.8884471620281	0.0176971283784745	0.914472398575863	0.973290422055949	96.8884471620281	0.117872969483335	0.471752002981165	0.667752922203776	96.8884471620281	0.140247267634016	0.388138295734814	0.542978100739855	96.8884471620281	0.227037035714135	0.164057906763024	0.285958917123624	96.8884471620281	0.223316952642927	0.179234811795892	0.997577050174317	96.8884471620281	0.266100304519663
ENSG00000134248.9	LAMTOR5	chr1	110943871	110950564	-	6693	6137	305	223	227.296296296296	FALSE	222.315849653669	0.504848148632767	0.000282065033314685	0.0102722536312881	222.315849653669	0.41366395788193	0.00323037659654732	0.0294109902017618	222.315849653669	0.47772502933687	0.000649307397813036	0.00342621468941012	222.315849653669	0.49928055653826	0.000324653635061648	0.00168018182944543	222.315849653669	0.338775715121226	0.0164841784286347	0.129971969402705	222.315849653669	0.31362655960559	0.0269334376077456	0.105339140221139	222.315849653669	0.0869904461740154	0.543350703511462	0.684755970983243	222.315849653669	0.220519926906409	0.123214650999029	0.231183570265491	222.315849653669	-0.166072433511541	0.223580536445003	0.998625307316004	222.315849653669	-0.10003739827634
ENSG00000121931.11	LRIF1	chr1	111489807	111506701	-	16894	2937	157	97	108.777777777778	FALSE	106.949626373803	0.5439330819492	0.000419257454820105	0.0133054347983266	106.949626373803	0.116846513262336	0.469259242323574	0.698816428236513	106.949626373803	0.0164242912421904	0.919936924618353	0.951858350274649	106.949626373803	0.566358780464765	0.000227478587383504	0.00123405050518304	106.949626373803	0.0575085371375685	0.724421953613561	0.893154361712343	106.949626373803	0.338853276829987	0.0333587458853935	0.121237552530719	106.949626373803	0.338002690934653	0.0327130079557809	0.0872936302387596	106.949626373803	0.669331226277194	1.71802905364319e-05	0.000156257995605664	106.949626373803	-0.486424544811631	0.00158783211187308	0.304225168343011	106.949626373803	0.222006763567652
ENSG00000156171.10	DRAM2	chr1	111659955	111682838	-	22883	1521	87	55	56.3333333333333	FALSE	55.1462160024909	0.386272464548654	0.0895437717998447	0.309004254840163	55.1462160024909	-0.009073718815696	0.969452951974258	0.986437527910599	55.1462160024909	0.325893134302924	0.157818080899066	0.274705478328913	55.1462160024909	0.295376946953982	0.196190910523797	0.319587980002651	55.1462160024909	0.00748169526099682	0.974866187511222	0.989874830660025	55.1462160024909	0.289864550855906	0.212372997265258	0.409004432964691	55.1462160024909	0.30028755643885	0.193637113404057	0.336436782797857	55.1462160024909	0.445472754910468	0.053550971924761	0.122045123499212	55.1462160024909	-0.378790769287657	0.0972321155031803	NA	55.1462160024909	0.298938269671602
ENSG00000134255.9	CEPT1	chr1	111682249	111727724	+	45475	1511	85	56	55.962962962963	FALSE	55.1072112518754	-0.177949783364044	0.367629675483901	0.641673010479267	55.1072112518754	-0.213943123353415	0.286127826931231	0.535717363579363	55.1072112518754	-0.371571174353045	0.0693303196255725	0.147314495502831	55.1072112518754	-0.220755946970588	0.264489196208995	0.398956203957414	55.1072112518754	-0.0700056421291709	0.724289282426549	0.893154361712343	55.1072112518754	-0.404826141861401	0.0502643832531584	0.158822343009884	55.1072112518754	-0.226479388940952	0.259645953053057	0.410510028688476	55.1072112518754	-0.255465052223468	0.212119842829058	0.347062589464005	55.1072112518754	0.107944141234873	0.589039448558902	NA	55.1072112518754	-0.190883018507986
ENSG00000116455.9	WDR77	chr1	111982512	111991998	-	9486	2298	156	79	85.1111111111111	FALSE	83.0449206910234	-0.242195885995876	0.262191634183271	0.54562877315048	83.0449206910234	-0.23979670846184	0.270216165641142	0.518169661123625	83.0449206910234	-0.404054658762894	0.0661307840392115	0.141838799655427	83.0449206910234	-0.369960301438729	0.0885799756076091	0.17421904897061	83.0449206910234	-0.482130321970606	0.0294247577732432	0.181449269655128	83.0449206910234	-0.0773583368829886	0.720644727769696	0.844140396910298	83.0449206910234	-0.305811311533011	0.161552512335175	0.296180470057065	83.0449206910234	-0.39411007046049	0.075247861334613	0.158787104207877	83.0449206910234	-0.23993443597473	0.281646192804315	0.998625307316004	83.0449206910234	0.162438371578851
ENSG00000116459.6	ATP5F1	chr1	111991486	112005395	+	13909	11641	593	422	431.148148148148	FALSE	424.403005620557	-0.0569057759848762	0.547428195573762	0.768105423901568	424.403005620557	0.0737619915186097	0.435223090062582	0.670607313732634	424.403005620557	0.157071477947976	0.0952149428037589	0.18843652154882	424.403005620557	-0.238934468206504	0.0123594523334208	0.0365599512099791	424.403005620557	-0.0362014353875056	0.70429223187082	0.883946436780241	424.403005620557	0.0347236874487055	0.715209809510329	0.841010520617933	424.403005620557	0.0749768176167694	0.427870800122293	0.579493968889909	424.403005620557	-0.10069452145948	0.2964283370588	0.443220966364546	424.403005620557	0.0207043405973706	0.827619879939264	0.998625307316004	424.403005620557	-0.0390383040699042
ENSG00000116473.10	RAP1A	chr1	112084840	112259313	+	174473	4559	250	159	168.851851851852	FALSE	165.879145547872	-0.1077474518365	0.543861518683511	0.765922918731631	165.879145547872	0.340542272658674	0.0516271536718578	0.191468650888201	165.879145547872	0.213706784062375	0.224583278709035	0.357642834159227	165.879145547872	0.129209825492614	0.461320998051389	0.59896235953896	165.879145547872	-0.0410134173376354	0.818076794001098	0.93298849939741	165.879145547872	0.115449941853187	0.514805908805312	0.701728072655929	165.879145547872	0.268918601407932	0.125563809275331	0.245762116568411	165.879145547872	0.0153461081196847	0.931560582013837	0.958694602624886	165.879145547872	0.0667340344988648	0.70816484947203	0.998625307316004	165.879145547872	-0.225092330805487
ENSG00000064703.7	DDX20	chr1	112297867	112310638	+	12771	1724	88	64	63.8518518518519	FALSE	63.0131268869797	-0.22813349697623	0.269073667654618	0.553002288825962	63.0131268869797	-0.409714877467372	0.0531720331285817	0.195028400523169	63.0131268869797	-0.477540182839725	0.0254090633200284	0.0665398653363865	63.0131268869797	-0.0238379616925495	0.906416030282925	0.940386788685823	63.0131268869797	0.0268370373493174	0.89573565978868	0.964087581502205	63.0131268869797	-0.285393874749224	0.176000729976908	0.362527233791101	63.0131268869797	-0.671594998957205	0.00203401079376677	0.00971210097442854	63.0131268869797	-0.167328464633141	0.42527502247739	0.573530710234343	63.0131268869797	0.254970534325547	0.21743289916506	0.998625307316004	63.0131268869797	0.124321002718147
ENSG00000143079.10	CTTNBP2NL	chr1	112938803	113006078	+	67275	3060	177	109	113.333333333333	FALSE	110.929336987581	0.485733457477215	0.00365737302220808	0.0535410488885354	110.929336987581	0.146708140069451	0.396601628342405	0.6394850425423	110.929336987581	0.427277369693488	0.0116690704044934	0.0361042338490001	110.929336987581	0.828855212947505	3.91704948745091e-07	4.21901839339258e-06	110.929336987581	0.350481678428551	0.0400949608726196	0.217378781155642	110.929336987581	0.428500501006599	0.011790413703249	0.0606468856806607	110.929336987581	0.475302795143115	0.00484167825851624	0.0195737729777868	110.929336987581	0.492076307737276	0.00382862555107222	0.0149609352008917	110.929336987581	-0.135251779048664	0.40492794352265	0.998625307316004	110.929336987581	0.281792360937149
ENSG00000116489.8	CAPZA1	chr1	113161795	113214241	+	52446	14868	830	518	550.666666666667	FALSE	540.359433909907	0.101264837733658	0.366675916645719	0.640332329075732	540.359433909907	0.24674410995483	0.0277384435451154	0.127912994773759	540.359433909907	0.117243215707319	0.29791835504072	0.440336410993319	540.359433909907	0.0913324164614922	0.415262358608513	0.55673224480918	540.359433909907	0.0830051219814085	0.462075685815589	0.738888706884529	540.359433909907	0.183839180712306	0.102548693382569	0.254233235135459	540.359433909907	0.30390108376535	0.006627362448506	0.0252858491702122	540.359433909907	0.15704625846506	0.164460487122246	0.286492038535244	540.359433909907	-0.0182597157522491	0.87050462205574	0.998625307316004	540.359433909907	-0.0629049292425233
ENSG00000155363.14	MOV10	chr1	113215763	113243368	+	27605	4899	221	186	181.444444444444	FALSE	178.581029682889	0.167769913689674	0.234974279638936	0.516169111201614	178.581029682889	-0.183684973585059	0.206943700060501	0.442362693946985	178.581029682889	-0.0576677603277035	0.68964422097955	0.792778596070411	178.581029682889	0.0915404582966947	0.518119875133358	0.649917166916293	178.581029682889	-0.00464273536738024	0.974300107854275	0.989740378254746	178.581029682889	0.168475695315658	0.238226169037753	0.440260770651993	178.581029682889	-0.201496358025555	0.166988765459723	0.303448296497975	178.581029682889	0.0850533395279632	0.555286764752217	0.68703400049961	178.581029682889	-0.172412649057055	0.223857748846303	0.998625307316004	178.581029682889	0.352160668900717
ENSG00000155366.12	RHOC	chr1	113243728	113250056	-	6328	4807	259	172	178.037037037037	FALSE	173.675800401272	-0.265695483322368	0.0472395820954579	0.223997292689562	173.675800401272	-0.0384984862696889	0.771966904195044	0.887527223531784	173.675800401272	0.00877467527564266	0.947211226776065	0.970250024337996	173.675800401272	-0.0897101188703624	0.496649025057428	0.631091553933977	173.675800401272	-0.328178436521275	0.0160280754992696	0.127781964831328	173.675800401272	-0.255630247294423	0.0598472327952071	0.179481103819848	173.675800401272	-0.14019151730842	0.295093403797886	0.447933542616048	173.675800401272	-0.391811832787664	0.00459268631835669	0.0174255382685387	173.675800401272	-0.0624829531989071	0.650096344427239	0.998625307316004	173.675800401272	-0.217131761024734
ENSG00000155380.7	SLC16A1	chr1	113454469	113499635	-	45166	8287	507	309	306.925925925926	FALSE	301.973695434787	0.353329213527435	0.0288576131273908	0.175997769560737	301.973695434787	-0.08274087658285	0.614860025170237	0.802942832558924	301.973695434787	0.0632850832978097	0.698999079744518	0.800219765860576	301.973695434787	0.443157493307976	0.00597966112896274	0.0200434812493259	301.973695434787	0.29019841946572	0.0743594893692166	0.302719911321338	301.973695434787	0.0958154878794797	0.558598774023927	0.733856299350837	301.973695434787	0.0178726164557684	0.913179269101454	0.951053033630092	301.973695434787	0.519223751954238	0.00135377015393147	0.00637161101050585	301.973695434787	-0.0631307940617151	0.693886171361559	0.998625307316004	301.973695434787	0.17855636446233
ENSG00000198799.7	LRIG2	chr1	113615831	113674882	+	59051	1307	77	48	48.4074074074074	FALSE	47.6239078249657	0.121193855099281	0.59021280316087	0.794798520942219	47.6239078249657	-0.0277800743160483	0.904388891837314	0.955690295262977	47.6239078249657	0.0860706883367264	0.706928963696656	0.805944627542362	47.6239078249657	0.327993606493888	0.136354427426242	0.242523106907443	47.6239078249657	0.0473691020829783	0.837173198217921	0.941183403624387	47.6239078249657	0.5021901265733	0.023069543820999	0.0953469611132078	47.6239078249657	0.558521815532623	0.010616111912996	0.0363665267767472	47.6239078249657	0.396250590592874	0.0776541914485775	0.162782530127874	47.6239078249657	-0.0738247530163023	0.74291220641674	NA	47.6239078249657	0.529970200889348
ENSG00000081026.14	MAGI3	chr1	113933371	114228545	+	295174	1174	67	43	43.4814814814815	FALSE	42.7673368355336	0.109268728901457	0.631900814903004	0.820197289107229	42.7673368355336	-0.241362460443763	0.31041041342851	0.561544571198238	42.7673368355336	-0.0788085992461472	0.736908626434944	0.826759072081219	42.7673368355336	-0.758149029661356	0.00225437296294018	0.00880543215326875	42.7673368355336	0.0815143178847101	0.724931536340682	0.893321540968424	42.7673368355336	-0.222857051483019	0.351808880050328	0.564108813796611	42.7673368355336	-0.0584096419949466	0.802763337337324	0.880443719523507	42.7673368355336	-0.757387640923905	0.00325355443130309	0.0130642045533481	42.7673368355336	-0.0277544110167471	0.902844718612507	NA	42.7673368355336	0.0185054089607448
ENSG00000116793.11	PHTF1	chr1	114239453	114302111	-	62658	2150	120	74	79.6296296296296	FALSE	78.1996001534672	0.315962653649936	0.1756029247538	0.447980202759971	78.1996001534672	0.710626100858034	0.0019826189916346	0.0208751590630611	78.1996001534672	0.475529551122766	0.0411805695592135	0.0982627661394122	78.1996001534672	0.536082370637118	0.0198000394467484	0.0533970107811249	78.1996001534672	0.436481721072014	0.0618874937196986	0.27413124273641	78.1996001534672	0.650605022151357	0.00492129364715277	0.033229950872796	78.1996001534672	0.706348882668266	0.00212404803880796	0.0100341790924229	78.1996001534672	0.837645325910604	0.00026757194324812	0.00163749606591102	78.1996001534672	0.120519067422078	0.595080218184915	0.998625307316004	78.1996001534672	-0.0600210787066775
ENSG00000081019.9	RSBN1	chr1	114304454	114355098	-	50644	2056	106	76	76.1481481481482	FALSE	75.4077294139635	0.177239432441048	0.343428565944922	0.620391591174339	75.4077294139635	-0.0556015805621713	0.773682112380809	0.888251279231223	75.4077294139635	0.382239083835795	0.0397679300033688	0.0955333403649461	75.4077294139635	0.491727541079251	0.00690365191215484	0.022603482273916	75.4077294139635	0.331827423476162	0.0761220412526029	0.306795383679388	75.4077294139635	0.213736735375752	0.259832553820477	0.465966356519912	75.4077294139635	-0.100444299517908	0.605248472677311	0.735837724478121	75.4077294139635	0.614141350982868	0.000857490637738339	0.00436156943728843	75.4077294139635	0.154587991035114	0.395306161754695	0.998625307316004	75.4077294139635	0.269338315937923
ENSG00000118655.4	DCLRE1B	chr1	114447763	114456708	+	8945	811	49	28	30.037037037037	FALSE	29.5975978315065	0.341408168147694	0.233926307637675	0.515415117696102	29.5975978315065	-0.196060521019661	0.517497000234375	0.736258913808367	29.5975978315065	-0.345212157708992	0.262639060298094	0.401896106390367	29.5975978315065	-0.190359340530204	0.523994587561022	0.655066953442211	29.5975978315065	0.0742192356105974	0.802367382827093	0.926664253594602	29.5975978315065	0.0503785293554098	0.865783909962018	0.930497801635522	29.5975978315065	-0.0119912308811637	0.967889236198073	0.980900658333108	29.5975978315065	-0.0446115848299166	0.882790269766363	0.929109835028296	29.5975978315065	-0.267188932537096	0.350332733999537	NA	29.5975978315065	0.246439050375071
ENSG00000163349.17	HIPK1	chr1	114471814	114520426	+	48612	3427	201	123	126.925925925926	FALSE	124.716857231987	0.197222242097276	0.177272314826257	0.449291930216861	124.716857231987	0.143369946604177	0.333758594378861	0.582438898203174	124.716857231987	0.305340926004513	0.0370937193955985	0.0905535138871671	124.716857231987	0.29657573755004	0.0403971879284262	0.0946399715085672	124.716857231987	0.144909726550179	0.330358708689599	0.633765883297157	124.716857231987	0.214333442779485	0.148604030989021	0.324525785049998	124.716857231987	0.342119877329249	0.0190147680728386	0.0575102890045079	124.716857231987	0.243904478156973	0.101322212628101	0.199192296772855	124.716857231987	-0.0523125155470972	0.717812059260575	0.998625307316004	124.716857231987	0.070963496175308
ENSG00000116774.7	OLFML3	chr1	114522063	114524876	+	2813	1075	78	30	39.8148148148148	FALSE	39.2197375013319	-0.208879834787522	0.358938963290369	0.633853240681226	39.2197375013319	-1.35791761268587	1.47202614575426e-07	1.15755967532499e-05	39.2197375013319	-1.7342150757762	2.29507054866625e-10	6.10598709444561e-09	39.2197375013319	-1.91372210712982	3.13144006540829e-12	8.83364330832321e-11	39.2197375013319	0.012907933044552	0.954579941605988	0.983365175233384	39.2197375013319	-0.683367896430252	0.00457540233212838	0.0314926608236195	39.2197375013319	-1.60121207435482	2.10059621014922e-09	5.65633270405635e-08	39.2197375013319	-1.45401784938679	5.22622733922051e-08	9.10593257574773e-07	39.2197375013319	0.221787767832074	0.331088859709438	NA	39.2197375013319	0.674549716255623
ENSG00000197323.6	TRIM33	chr1	114935399	115053781	-	118382	10589	543	402	392.185185185185	TRUE	385.537148936265	0.124293294294206	0.309558872350013	0.592421060032646	385.537148936265	0.0958343483607781	0.436201750851623	0.671649412245282	385.537148936265	-0.0485386224114948	0.695299940369427	0.797835133022047	385.537148936265	0.372386287687594	0.00210803454741787	0.0083290328983349	385.537148936265	0.269083544461954	0.0278799145467918	0.176453647195721	385.537148936265	0.184123568845729	0.134324495260973	0.303485244060262	385.537148936265	0.017533765462236	0.887144525700429	0.936576720372343	385.537148936265	0.274025599925891	0.0256785331713544	0.0689106082639704	385.537148936265	0.144790250167748	0.232034058200193	0.998625307316004	385.537148936265	0.0882892204849504
ENSG00000116752.5	BCAS2	chr1	115110178	115124260	-	14082	2974	167	105	110.148148148148	FALSE	108.626561874263	0.431652185826595	0.0886333968650818	0.308185636350808	108.626561874263	-0.229135396848952	0.379027805822298	0.623480392916871	108.626561874263	-0.382680423623744	0.144750822523598	0.258543881194913	108.626561874263	0.174404727189209	0.494334093183288	0.628869399001674	108.626561874263	0.388770703633585	0.12728488510308	0.400697876322413	108.626561874263	0.382255573875852	0.134307772257828	0.303485244060262	108.626561874263	0.237750953499985	0.35305259510182	0.509703551596227	108.626561874263	0.446984251653075	0.0799235439482679	0.166440265180293	108.626561874263	-0.0428814821930099	0.86406904550027	0.998625307316004	108.626561874263	0.611390970724804
ENSG00000213281.4	NRAS	chr1	115247090	115259515	-	12425	15289	960	572	566.259259259259	TRUE	553.485933391499	0.607125035268816	0.176998175703094	0.449137861741134	553.485933391499	0.53479055783012	0.234536414542759	0.476789229676717	553.485933391499	0.298326441826519	0.507463557744417	0.645104764212051	553.485933391499	0.70216422315238	0.118355923623104	0.217430377778561	553.485933391499	0.377330355593351	0.401790385468673	0.695018369724475	553.485933391499	0.366282932569886	0.415766522077709	0.62009085518337	553.485933391499	0.506211981108307	0.260529611613837	0.411274849671443	553.485933391499	0.175989348678811	0.695976178532606	0.799333633506622	553.485933391499	-0.229794679675465	0.609053409396795	0.998625307316004	553.485933391499	-0.168507625260234
ENSG00000009307.11	CSDE1	chr1	115259534	115301297	-	41763	112613	6724	3912	4170.85185185185	FALSE	4107.54411705633	-0.0918827289148907	0.366162216110422	0.640197332182572	4107.54411705633	0.0670170271719281	0.509747382342702	0.730615941589493	4107.54411705633	0.48570204021753	1.68355219706157e-06	1.95556141478289e-05	4107.54411705633	0.0610746095926295	0.547635515662468	0.67530916826988	4107.54411705633	-0.124984413817283	0.219543420696518	0.52358100813453	4107.54411705633	0.118426435062751	0.244074303327662	0.446907945470761	4107.54411705633	0.408675007434222	5.64507206068757e-05	0.00048559642140629	4107.54411705633	0.199016227471875	0.0502511921981969	0.116223866182503	4107.54411705633	-0.0331016849023923	0.745025160884222	0.998625307316004	4107.54411705633	0.0514094078908233
[truncated: 8,377 more rows]
[truncated: 13 more columns]
