# Supplementary material for: circHIPK3 nucleates IGF2BP2 and functions as a competing endogenous RNA
Source: bioRxiv preprint, doi:10.1101/2023.09.14.557527, version 4 (2024-06-03)
Supplement: Supplementary Table S7 [file 557527_file09.xlsx]

## Sheet: Sheet 1
UMUC3_circHIPK3_KD
tracking_id	Gene	chr	start	end	strand	size	sumReads	max	median	mean	Cosmic_gene	scr_12_scr_0_baseMean	scr_12_scr_0_FC	scr_12_scr_0_pval	scr_12_scr_0_padj	scr_24_scr_0_baseMean	scr_24_scr_0_FC	scr_24_scr_0_pval	scr_24_scr_0_padj	scr_48_scr_0_baseMean	scr_48_scr_0_FC	scr_48_scr_0_pval	scr_48_scr_0_padj	scr_72_scr_0_baseMean	scr_72_scr_0_FC	scr_72_scr_0_pval	scr_72_scr_0_padj	HIPK3_12_scr_0_baseMean	HIPK3_12_scr_0_FC	HIPK3_12_scr_0_pval	HIPK3_12_scr_0_padj	HIPK3_24_scr_0_baseMean	HIPK3_24_scr_0_FC	HIPK3_24_scr_0_pval	HIPK3_24_scr_0_padj	HIPK3_48_scr_0_baseMean	HIPK3_48_scr_0_FC	HIPK3_48_scr_0_pval	HIPK3_48_scr_0_padj	HIPK3_72_scr_0_baseMean	HIPK3_72_scr_0_FC	HIPK3_72_scr_0_pval	HIPK3_72_scr_0_padj	HIPK3_12_scr_12_baseMean	HIPK3_12_scr_12_FC	HIPK3_12_scr_12_pval	HIPK3_12_scr_12_padj	HIPK3_24_scr_24_baseMean	HIPK3_24_scr_24_FC
ENSG00000188976.6	NOC2L	chr1	879584	894689	-	15105	3121	245	118	115.592592592593	FALSE	109.441541259072	-0.0745023227856051	0.636960975583031	0.762000933860749	109.441541259072	-0.0700404636593595	0.658303909153813	0.822041081598781	109.441541259072	-0.611654640925743	0.000223538545297878	0.00260659799050517	109.441541259072	-0.824739281450715	2.07658948695818e-06	1.59057525414388e-05	109.441541259072	-0.0434360664278687	0.781888398546377	0.940077065756122	109.441541259072	-0.104391371406174	0.501902099697272	0.904788785165563	109.441541259072	-0.417939925684395	0.0106673838949857	0.0334583837388381	109.441541259072	-0.72092928926959	3.65409569015166e-05	0.000155110061881955	109.441541259072	0.0310662563577364	0.848004713075043	0.951218337900972	109.441541259072	-0.0343509077468147
ENSG00000187961.9	KLHL17	chr1	895967	901095	+	5128	883	56	33	32.7037037037037	FALSE	33.0126968971501	0.818294278687681	0.00496312996145605	0.0464861857368117	33.0126968971501	0.386954754299395	0.19964650028528	0.443819575987982	33.0126968971501	-0.0298332657377992	0.923994804786363	0.966269809811176	33.0126968971501	0.734519156887492	0.0136427173904593	0.0314582006298067	33.0126968971501	0.131941916779435	0.666015281892899	0.897324472523637	33.0126968971501	-0.133634282560142	0.6642159918193	0.945599309822077	33.0126968971501	0.517857896775957	0.0837092318287497	0.17032407335734	33.0126968971501	0.840601904363977	0.004925593079271	0.0115745392866316	33.0126968971501	-0.686352361908246	0.0213831928234358	NA	33.0126968971501	-0.520589036859537
ENSG00000187583.6	PLEKHN1	chr1	901877	911245	+	9368	732	50	24	27.1111111111111	FALSE	26.3516283703875	0.522645635981359	0.146449209218686	0.297505493635541	26.3516283703875	0.680301883964221	0.0573207559340043	0.220702839089953	26.3516283703875	-0.038273019839072	0.918297810698524	0.963703840554035	26.3516283703875	-0.226359815293411	0.557003617431431	0.649046676322737	26.3516283703875	0.383737458307071	0.288649515275722	0.716242143563558	26.3516283703875	-0.151555759661898	0.681436191224812	0.949229818911123	26.3516283703875	-0.835773131534749	0.0385194542777067	0.0927934407355323	26.3516283703875	0.0652422444278286	0.864019741484764	0.895831802716185	26.3516283703875	-0.138908177674288	0.69981930065527	NA	26.3516283703875	-0.831857643626118
ENSG00000188290.6	HES4	chr1	934342	935552	-	1210	1404	109	49	52	FALSE	54.0327010896899	1.57434595261343	2.8491355451533e-06	0.000323039486744552	54.0327010896899	1.67150320579905	6.35552399232485e-07	3.96851813346835e-05	54.0327010896899	1.64801932854977	9.07758586174704e-07	2.51516261642039e-05	54.0327010896899	2.67636349569395	2.96966234311572e-16	1.25439119659942e-14	54.0327010896899	1.20253299341174	0.000423221654278475	0.0296496015846961	54.0327010896899	1.3572345779105	5.34279587517814e-05	0.00247520817507581	54.0327010896899	1.18628387348324	0.000557910088714403	0.00288912934762741	54.0327010896899	1.81082854016912	8.95592212734552e-08	6.68745069075705e-07	54.0327010896899	-0.371812959201689	0.24228612189065	NA	54.0327010896899	-0.314268627888548
ENSG00000187608.5	ISG15	chr1	948803	949920	+	1117	67425	4611	2262	2497.22222222222	FALSE	2539.96379694587	1.88424672033226	9.47282382522714e-23	2.04068307254956e-19	2539.96379694587	2.91069811809693	3.6335867510481e-52	1.56553085168907e-48	2539.96379694587	2.4335902140703	6.17722296986481e-37	5.3229130331325e-34	2539.96379694587	3.1522764600348	6.9905699274346e-61	1.20475482129408e-57	2539.96379694587	1.78333853651706	1.54627879123577e-20	3.33107108601965e-17	2539.96379694587	2.30614932089289	2.32571940483799e-33	2.86296058735557e-30	2539.96379694587	1.02514794761953	1.0381449738241e-07	1.72350870524914e-06	2539.96379694587	1.33406099451957	4.47024481673324e-12	7.04206573780445e-11	2539.96379694587	-0.100908183815205	0.596362407389849	0.848767158347893	2539.96379694587	-0.604548797204033
ENSG00000131591.13	C1orf159	chr1	1017198	1051741	-	34543	1387	80	52	51.3703703703704	FALSE	50.9350500857516	0.62493162825832	0.00563442164970913	0.0497555751991643	50.9350500857516	0.440650933956448	0.0550932616374432	0.21500844000446	50.9350500857516	0.0356477734408915	0.880709985455643	0.943797779464156	50.9350500857516	0.280198569117308	0.236748355690175	0.332528212059045	50.9350500857516	0.23249252366196	0.315729846871441	0.736345470643283	50.9350500857516	-0.0164502558781631	0.943694828600692	0.993959434783605	50.9350500857516	0.0944711474545331	0.69107321770132	0.791569575559255	50.9350500857516	0.412358740100351	0.0821468809568168	0.130794470289152	50.9350500857516	-0.39243910459636	0.0864876573307437	NA	50.9350500857516	-0.457101189834611
ENSG00000078808.12	SDF4	chr1	1152288	1167411	-	15123	24879	1344	908	921.444444444444	FALSE	910.441009162357	-0.0288645609432497	0.815483349249822	0.884792246346728	910.441009162357	0.410214566274053	0.000834773141612671	0.0148620664489182	910.441009162357	0.463583082333158	0.000156571519267015	0.00193806351238593	910.441009162357	0.422296702106993	0.000605817296130819	0.0022233081945312	910.441009162357	0.190856396672737	0.120934289624041	0.587424336916777	910.441009162357	0.00233079766304437	0.984885247434228	0.998380568949924	910.441009162357	0.43021591444193	0.000460142224061624	0.00245058439106243	910.441009162357	0.59498912689692	1.36797942715542e-06	8.05182972937038e-06	910.441009162357	0.219720957615986	0.0767101948634267	0.503059980591132	910.441009162357	-0.407883768611009
ENSG00000176022.3	B3GALT6	chr1	1167629	1170421	+	2792	5966	306	219	220.962962962963	FALSE	223.458021917767	0.0389624793683049	0.845404212993994	0.903378981072575	223.458021917767	0.286469700015862	0.149171970213666	0.379066607882973	223.458021917767	-0.156878777360687	0.435900824443551	0.650867683976795	223.458021917767	0.388082673210536	0.0512591489403228	0.0957304045120853	223.458021917767	0.0261641320680782	0.895725306440423	0.97665000197357	223.458021917767	0.155446302080139	0.431785576405358	0.87257798945107	223.458021917767	0.768887582764871	9.03623916237321e-05	0.000626430191972405	223.458021917767	1.0081752945389	3.01663942713538e-07	2.0197654967852e-06	223.458021917767	-0.0127983473002266	0.949463864627602	0.987068262403782	223.458021917767	-0.131023397935723
ENSG00000160087.16	UBE2J2	chr1	1189289	1209265	-	19976	18581	1120	692	688.185185185185	FALSE	685.192849945203	0.510375833374964	0.01310823307384	0.0747047912680418	685.192849945203	0.20518972664643	0.319821905486142	0.568497074727248	685.192849945203	-0.396252784479475	0.0561180689668466	0.178014487586835	685.192849945203	0.0479849969232072	0.816603644505495	0.864881219850522	685.192849945203	0.162647040977704	0.430214046867449	0.798643804379319	685.192849945203	-0.0448765735108144	0.827706236019622	0.978723744630602	685.192849945203	0.0794252564460919	0.700578112846606	0.798318116688602	685.192849945203	0.591263935490002	0.00414736490158174	0.00999380407072983	685.192849945203	-0.34772879239726	0.0915591521595526	0.514841601531612	685.192849945203	-0.250066300157244
ENSG00000169972.7	PUSL1	chr1	1243947	1247057	+	3110	823	56	33	30.4814814814815	FALSE	29.8036934571841	0.250862002064597	0.426940838366857	0.585167680007509	29.8036934571841	0.215599892415299	0.497048626510628	0.713853676591512	29.8036934571841	-0.482650294993851	0.149550797175778	0.341100905045971	29.8036934571841	-0.425922287694997	0.210450469120716	0.302443577787393	29.8036934571841	0.0484260187233889	0.879313090682595	0.970617404747742	29.8036934571841	-0.442000253062225	0.175262397608674	0.65627391680287	29.8036934571841	0.066889617238745	0.835241809908178	0.894071885214754	29.8036934571841	-0.352650869354335	0.303605319324388	0.391583151716547	29.8036934571841	-0.202435983341208	0.530347931277429	NA	29.8036934571841	-0.657600145477523
ENSG00000127054.14	CPSF3L	chr1	1246965	1260071	-	13106	2248	151	79	83.2592592592593	FALSE	81.0949377246772	0.0695987131453691	0.731643384269736	0.828693628816235	81.0949377246772	-0.0784688498154471	0.702690302185517	0.84924015903683	81.0949377246772	-0.361544567444319	0.0844646141496137	0.234180045085979	81.0949377246772	-0.135824422594146	0.516424633091355	0.612445783560172	81.0949377246772	0.151315515270413	0.452344553915383	0.806685128423161	81.0949377246772	-0.241983452024019	0.235111742515685	0.730734764760223	81.0949377246772	-0.395274666013269	0.0613441456335343	0.133792327373116	81.0949377246772	-0.233454325940942	0.275042913633264	0.361067152159938	81.0949377246772	0.0817168021250443	0.691015509152224	0.888641223583813	81.0949377246772	-0.163514602208572
ENSG00000224051.2	GLTPD1	chr1	1260136	1264277	+	4141	1786	99	71	66.1481481481482	FALSE	66.1024146009202	0.519830762827379	0.0193179475191094	0.0917052130387901	66.1024146009202	0.364988855892624	0.104847268715472	0.313307024505878	66.1024146009202	-0.389086699660334	0.103170502288439	0.267535425284225	66.1024146009202	0.222068011362008	0.335319912052611	0.439326696390049	66.1024146009202	0.273459561707687	0.22411007456359	0.677243271636226	66.1024146009202	0.0235171112529095	0.917050833767806	0.991881117603117	66.1024146009202	-0.28629143528408	0.228833493750419	0.365361907661176	66.1024146009202	0.808464498692116	0.000301214845737742	0.00100486578618743	66.1024146009202	-0.246371201119691	0.271499493884521	NA	66.1024146009202	-0.341471744639714
ENSG00000107404.13	DVL1	chr1	1270656	1284730	-	14074	12632	802	452	467.851851851852	FALSE	457.264791463535	0.146552203469255	0.227458584442554	0.391954618379591	457.264791463535	0.0620552818831746	0.61080351650645	0.793860317003934	457.264791463535	-0.134018507012842	0.274563725535221	0.497668410377997	457.264791463535	0.175202225804296	0.15174548167145	0.232543271485485	457.264791463535	0.00458630658295228	0.96996426234539	0.992069085890828	457.264791463535	-0.475696101629326	0.000110159628739287	0.00456368038868479	457.264791463535	-0.44084564673282	0.000400349580062396	0.00217791182537732	457.264791463535	-0.153053592861015	0.21985666124339	0.300000768002263	457.264791463535	-0.141965896886302	0.247612281173074	0.625066864163724	457.264791463535	-0.537751383512501
ENSG00000162576.12	MXRA8	chr1	1288069	1297157	-	9088	759	50	28	28.1111111111111	FALSE	28.4317625278621	0.663002814782443	0.0588810054548841	0.169154156171083	28.4317625278621	1.08611839209947	0.0015564222602654	0.0233263904822792	28.4317625278621	-0.0391741632076971	0.916083481872968	0.962536434168197	28.4317625278621	1.04006297755815	0.00278389246817867	0.00814837004018192	28.4317625278621	0.444027225477003	0.21097008403396	0.668478081826103	28.4317625278621	0.26712332177471	0.451242302794709	0.88051515470607	28.4317625278621	0.0900986408809952	0.807396722671329	0.875246893855685	28.4317625278621	1.20886490529856	0.000507358612805797	0.00159152135658812	28.4317625278621	-0.21897558930544	0.53139609241437	NA	28.4317625278621	-0.818995070324763
ENSG00000175756.9	AURKAIP1	chr1	1309110	1310875	-	1765	14379	1037	485	532.555555555556	FALSE	510.994175997797	0.0989507285640569	0.462646112148323	0.617506435623002	510.994175997797	-0.454147037892703	0.000897227119731845	0.0156862990874396	510.994175997797	-0.412740110002648	0.00249409516458384	0.0181363865259231	510.994175997797	-0.305762377460103	0.0255237326286925	0.0534219101436588	510.994175997797	-0.150008103541268	0.267683627491556	0.701366753912085	510.994175997797	-0.146498565268605	0.276875028802536	0.775962957555833	510.994175997797	-0.321442339889716	0.0184172913983619	0.0512602713112675	510.994175997797	-0.533889831734458	0.000120877442897078	0.000450324654320846	510.994175997797	-0.248958832105324	0.0675079916034689	0.495139396925625	510.994175997797	0.307648472624098
ENSG00000221978.7	CCNL2	chr1	1321091	1334708	-	13617	7214	366	255	267.185185185185	FALSE	263.896567391775	0.5254297218746	0.00466355055424358	0.0452033915927074	263.896567391775	0.31122841546194	0.095871347613205	0.29886797927049	263.896567391775	0.307863228064655	0.0993211499091425	0.260215977125899	263.896567391775	0.444655490441318	0.017511882514056	0.0388117005204785	263.896567391775	0.338413907320048	0.0693643124206856	0.516132933166892	263.896567391775	0.0547407629512447	0.769409885159951	0.972460567320456	263.896567391775	0.0156404950809974	0.933961251365652	0.959116208201386	263.896567391775	0.638688159130958	0.000641897174191237	0.00194499005472255	263.896567391775	-0.187015814554552	0.314671755353735	0.680765282107067	263.896567391775	-0.256487652510695
ENSG00000224870.3	RP4-758J18.2	chr1	1334902	1337426	+	2524	1396	100	49	51.7037037037037	FALSE	49.9873927940135	-0.36771798483507	0.112633085038693	0.254909499785533	49.9873927940135	-0.287875163121368	0.212723499270102	0.458660882810924	49.9873927940135	-0.669577100886835	0.00525839121833603	0.0319996872375717	49.9873927940135	-0.382359484554004	0.108023756925104	0.177709185456972	49.9873927940135	-0.256447398594522	0.260833657985709	0.699128881175987	49.9873927940135	-0.217001590562447	0.331768284831461	0.814033793603139	49.9873927940135	0.177424453792796	0.425069062133998	0.569734034594596	49.9873927940135	0.100335864890042	0.662447804284087	0.731834965322562	49.9873927940135	0.111270586240549	0.646210081646135	NA	49.9873927940135	0.0708735725589217
ENSG00000242485.1	MRPL20	chr1	1337288	1342693	-	5405	16540	1128	643	612.592592592593	FALSE	577.976743626354	0.0565180441115653	0.70337279815545	0.807913010091378	577.976743626354	0.0370396496886812	0.803143295677886	0.911216034082468	577.976743626354	-0.409840405261505	0.00620097705727165	0.0363001489826833	577.976743626354	-0.660910748802469	1.27657613642828e-05	7.84698397614118e-05	577.976743626354	0.233202856837112	0.115044532160307	0.575258716818743	577.976743626354	-0.0424295545801934	0.774533348858235	0.973158623999101	577.976743626354	-0.688807262490881	5.03697773603813e-06	5.17943164098336e-05	577.976743626354	-1.2761796993215	2.70485780880345e-16	8.17816131174011e-15	577.976743626354	0.176684812725546	0.234897129943429	0.61896331563299	577.976743626354	-0.0794692042688746
ENSG00000160072.15	ATAD3B	chr1	1407143	1433228	+	26085	1530	136	51	56.6666666666667	FALSE	52.2150758183582	-0.295948829469811	0.265570784761542	0.432349036895939	52.2150758183582	-0.623131517279982	0.0217328455573813	0.127136408803771	52.2150758183582	-1.41008553284231	9.82168886340433e-07	2.68677755352239e-05	52.2150758183582	-1.42868011404488	1.25837009676136e-06	1.01529729623527e-05	52.2150758183582	0.108416661856324	0.677368357063991	0.901602693308338	52.2150758183582	-0.484947620077879	0.0673526035232628	0.436614882879803	52.2150758183582	-1.59860345551299	6.32776223874911e-08	1.09271196816235e-06	52.2150758183582	-1.23820153823908	2.47724161736518e-05	0.000109468671881209	52.2150758183582	0.404365491326134	0.1319661992255	NA	52.2150758183582	0.138183897202103
ENSG00000197785.9	ATAD3A	chr1	1447531	1470067	+	22536	9004	705	285	333.481481481481	FALSE	319.863476105322	0.453174135650984	0.0327403379634848	0.122148904937101	319.863476105322	-0.485204681215681	0.0240886440570463	0.134829387880804	319.863476105322	-0.969110964190934	8.15897091354933e-06	0.000166207688799183	319.863476105322	-0.576366661930803	0.00770929062731172	0.0191388525887482	319.863476105322	0.250595651451302	0.238493454735406	0.68444357008255	319.863476105322	-0.510890514997249	0.0170416041813256	0.205179298719885	319.863476105322	-1.30915853593064	2.55671483916086e-09	6.36740224538992e-08	319.863476105322	-0.769714098936151	0.000424055167114895	0.00136448221621697	319.863476105322	-0.202578484199682	0.340587307304364	0.698864226034192	319.863476105322	-0.025685833781568
ENSG00000160075.10	SSU72	chr1	1477053	1510249	-	33196	6819	432	239	252.555555555556	FALSE	247.460844930308	0.0191411178367174	0.89719495509821	0.937333769166013	247.460844930308	-0.228066138916913	0.128802116487681	0.352681232213012	247.460844930308	-0.0322010139999105	0.828451418047279	0.913954691150452	247.460844930308	0.0728491158716499	0.625634933386367	0.708608861854669	247.460844930308	-0.158988090848128	0.285962266109412	0.716073352169545	247.460844930308	-0.17950999330379	0.224759038085942	0.723207106492368	247.460844930308	-0.118979153082985	0.426517103469946	0.570964405872382	247.460844930308	0.135966198639725	0.365083688419004	0.457057408558268	247.460844930308	-0.178129208684845	0.23896017353174	0.621207865390669	247.460844930308	0.048556145613123
ENSG00000197530.8	MIB2	chr1	1550795	1565990	+	15195	755	57	26	27.962962962963	FALSE	29.0895741198042	0.275081146347583	0.443621309324701	0.60057459222118	29.0895741198042	-0.0148231350835959	0.967929245280592	0.98589199841405	29.0895741198042	0.198874801966283	0.582317111537469	0.763515908417282	29.0895741198042	0.883348147347746	0.0117144786841894	0.0275350962415877	29.0895741198042	-0.505863102898066	0.185878024596456	0.64997951083493	29.0895741198042	-0.498159501157944	0.184094358351824	0.668777860842188	29.0895741198042	0.68686251769639	0.0506617656035591	0.115154954947473	29.0895741198042	1.59151235043984	3.1128222748835e-06	1.68381604159894e-05	29.0895741198042	-0.780944249245649	0.0432890867067301	NA	29.0895741198042	-0.483336366074349
ENSG00000189339.7	SLC35E2B	chr1	1592939	1624167	-	31228	451	47	15	16.7037037037037	FALSE	17.1179792616339	0.796570656629103	0.056815472562682	0.166071549210526	17.1179792616339	0.751689992500733	0.0745859858176315	0.259045613936538	17.1179792616339	0.584416910017823	0.171155625200112	0.372060550542221	17.1179792616339	1.38616644061262	0.000652071554917915	0.00237585648571995	17.1179792616339	0.347142505818095	0.423690238902375	0.797775430967974	17.1179792616339	0.168849991451725	0.696946582644241	0.953547887254007	17.1179792616339	1.01968978895504	0.0136432195053738	0.0405811606758048	17.1179792616339	2.00584812986625	3.85084166695689e-07	2.51384110940663e-06	17.1179792616339	-0.449428150811008	0.28537066114179	NA	17.1179792616339	-0.582840001049008
ENSG00000215790.2	SLC35E2	chr1	1656277	1677431	-	21154	414	28	14	15.3333333333333	FALSE	16.2076363128425	1.44065770528016	0.00295212108080909	0.0358287709201858	16.2076363128425	0.741632284448182	0.143800532783466	0.371475086630163	16.2076363128425	0.632033136365296	0.215711811058941	0.428704027386757	16.2076363128425	1.67284875316373	0.000556705402885335	0.0020802820714063	16.2076363128425	1.01053514431761	0.0411236310942909	0.440201651104975	16.2076363128425	-0.112991730923861	0.832061388245133	0.979327564956737	16.2076363128425	0.689026655125607	0.177429499860727	0.300611482559945	16.2076363128425	2.12710736237455	8.77253039220768e-06	4.28045834596e-05	16.2076363128425	-0.430122560962551	0.350638832797335	NA	16.2076363128425	-0.854624015372043
ENSG00000008130.11	NADK	chr1	1682671	1711896	-	29225	1421	82	54	52.6296296296296	FALSE	51.0956710512747	0.311728665955002	0.169593163788673	0.325354559679373	51.0956710512747	0.0934168965583077	0.687469689292019	0.840511678863412	51.0956710512747	0.0582588028204845	0.802017495110858	0.899750651656068	51.0956710512747	0.0864008049755937	0.714934886562242	0.783890306337554	51.0956710512747	0.160044477254074	0.484156954223278	0.822883738070812	51.0956710512747	0.246054874386261	0.271662582725926	0.771827995117181	51.0956710512747	0.222005515908216	0.335076096684104	0.478038199524325	51.0956710512747	0.0886754530208398	0.71194784301904	0.774700664641378	51.0956710512747	-0.151684188700927	0.511837753882039	NA	51.0956710512747	0.152637977827953
ENSG00000078369.13	GNB1	chr1	1716729	1822495	-	105766	24453	1414	859	905.666666666667	FALSE	888.597636184764	-0.0122064723067437	0.891967413400422	0.933882136694356	888.597636184764	-0.0177177236292313	0.844020964935104	0.92885423433535	888.597636184764	0.156566923091206	0.079959794728547	0.22549649229867	888.597636184764	0.22542643673314	0.0121177777521234	0.0283285108220421	888.597636184764	-0.0471148699798359	0.600009863752402	0.870858176849326	888.597636184764	0.062478563269433	0.482394992634425	0.895389455111738	888.597636184764	0.23644869113211	0.00814998926280568	0.0267129925742094	888.597636184764	0.355058091757278	8.01498858022992e-05	0.000311665869114807	888.597636184764	-0.0349083976730923	0.701626490015389	0.893558367533787	888.597636184764	0.0801962868986644
ENSG00000067606.11	PRKCZ	chr1	1981909	2116834	+	134925	1733	98	57	64.1851851851852	FALSE	66.4524720593953	0.422894876634048	0.0910220366097037	0.221903418347942	66.4524720593953	0.763220553725266	0.00186559639762584	0.026397116844568	66.4524720593953	0.693133720370857	0.00483779406119185	0.0301004973130474	66.4524720593953	1.23730702062487	2.94454244139489e-07	2.71952006618433e-06	66.4524720593953	0.429509661828803	0.0847356444118354	0.53869141699052	66.4524720593953	0.112700085934046	0.653976997340095	0.941416603087136	66.4524720593953	0.899015977863651	0.000227702600919733	0.00135824079944108	66.4524720593953	1.56887108062741	5.63948712921584e-11	7.25305381976909e-10	66.4524720593953	0.00661478519475485	0.978869561247144	NA	66.4524720593953	-0.65052046779122
ENSG00000162585.12	C1orf86	chr1	2115903	2144159	-	28256	2464	131	91	91.2592592592593	FALSE	90.2490980997967	0.453733929878095	0.00966382775994851	0.0636158929010514	90.2490980997967	0.479819353749966	0.00629343233812417	0.0582671559966702	90.2490980997967	0.0149377725475373	0.934711443286372	0.972284947706261	90.2490980997967	0.310820280891762	0.0858221181274316	0.147199281828041	90.2490980997967	0.365358900532424	0.0376819167121664	0.424451080142141	90.2490980997967	0.00864172063939733	0.961313280153738	0.995488007933292	90.2490980997967	0.14750253493735	0.415657854998573	0.560787168466117	90.2490980997967	0.538187616388736	0.00274693900837502	0.00694553211125807	90.2490980997967	-0.0883750293456713	0.615238510561666	0.859006481894213	90.2490980997967	-0.471177633110568
ENSG00000157933.9	SKI	chr1	2160134	2241558	+	81424	2101	159	79	77.8148148148148	FALSE	75.7729606064207	0.0810189691716141	0.778304967701654	0.860599757049295	75.7729606064207	-0.147688397560789	0.611155675706788	0.793895853232442	75.7729606064207	-0.670311874532266	0.0238921653138079	0.0976654594445365	75.7729606064207	-0.314857045616179	0.285362717800462	0.385237433696786	75.7729606064207	-0.332933070735754	0.253423628664415	0.693865220015803	75.7729606064207	-0.505624328031995	0.0825213250920314	0.480139269627302	75.7729606064207	-0.741840306977456	0.0130458579197674	0.039251451709021	75.7729606064207	0.356817693995795	0.217082800528866	0.296638517627218	75.7729606064207	-0.413952039907368	0.159600903388048	NA	75.7729606064207	-0.357935930471206
ENSG00000157916.14	RER1	chr1	2323267	2336883	+	13616	9357	612	325	346.555555555556	FALSE	337.735480096372	0.199019848610169	0.210221825100833	0.374037015383303	337.735480096372	0.0217063565933109	0.891962917969617	0.950063851937464	337.735480096372	-0.0512297296965474	0.748891160142172	0.870289295609589	337.735480096372	0.0531802111795244	0.740497238612642	0.804547308677989	337.735480096372	0.107335914648259	0.499761180835565	0.830237535234251	337.735480096372	0.02061449420936	0.896575980231817	0.986943692087067	337.735480096372	0.116182071713327	0.466501517647233	0.607502429736467	337.735480096372	0.013237897811245	0.934793052474197	0.950455661730992	337.735480096372	-0.0916839339619103	0.566507584946008	0.832401139745181	337.735480096372	-0.00109186238395087
ENSG00000157911.5	PEX10	chr1	2336236	2345236	-	9000	1262	82	47	46.7407407407407	FALSE	46.6703666472843	0.0963249487701507	0.717488584305412	0.819297954523452	46.6703666472843	0.238093299570846	0.367695292438239	0.613056532961827	46.6703666472843	0.0563532058825531	0.833125104963217	0.916395076521322	46.6703666472843	0.579855872770113	0.0265285108004129	0.0551841655303912	46.6703666472843	-0.153666587024433	0.569980501799848	0.857597518153613	46.6703666472843	-0.182553827859582	0.49401507721762	0.898841132670174	46.6703666472843	0.393925544351602	0.132818984622012	0.243770221616161	46.6703666472843	0.585687080272656	0.0266671003350237	0.0498136578337088	46.6703666472843	-0.249991535794584	0.366590194973297	NA	46.6703666472843	-0.420647127430428
ENSG00000157870.10	FAM213B	chr1	2517930	2522908	+	4978	681	55	29	25.2222222222222	FALSE	23.6288923502413	0.328481230473109	0.236030906077363	0.400212183720708	23.6288923502413	-0.227022423186056	0.438990604371181	0.66951510836049	23.6288923502413	-0.139916161403798	0.629197568201034	0.795721680922991	23.6288923502413	-0.700745296748403	0.0279489100554957	0.0575611276166841	23.6288923502413	0.0846633491065817	0.76368967657543	0.934362337505392	23.6288923502413	-0.495211885761977	0.0904935433237915	0.498263810109337	23.6288923502413	-1.70201730665805	3.95470303506446e-06	4.18596605735059e-05	23.6288923502413	-2.31061814518213	2.34011877182718e-07	1.60165237941499e-06	23.6288923502413	-0.243817881366527	0.391066035097941	NA	23.6288923502413	-0.268189462575921
ENSG00000158109.10	TPRG1L	chr1	3541566	3546691	+	5125	4915	268	175	182.037037037037	FALSE	182.39189275714	0.663566814533053	0.00166997709407294	0.0261800906346919	182.39189275714	0.960736372540842	4.65267884025607e-06	0.000235836079802862	182.39189275714	0.428344398395529	0.0440393932951494	0.150530524404721	182.39189275714	0.272755832858218	0.205706419074387	0.297311676142904	182.39189275714	0.523021808075059	0.0134830342289849	0.275315890879533	182.39189275714	0.431648066198871	0.0408181870637821	0.341049648849341	182.39189275714	0.613135480306915	0.00381102196486386	0.0142594773214207	182.39189275714	0.877352882849344	3.60006827507383e-05	0.000153118402400351	182.39189275714	-0.140545006457995	0.504003172743459	0.799394345233476	182.39189275714	-0.529088306341971
ENSG00000116213.11	WRAP73	chr1	3547331	3569325	-	21994	2501	234	101	92.6296296296296	FALSE	83.7443599836373	-1.38013208665493	0.0578610740622625	0.167367866799099	83.7443599836373	-0.603995084782452	0.403792560460728	0.642095317260458	83.7443599836373	-0.158349729254917	0.826327210838138	0.913230931870237	83.7443599836373	-1.76495280701153	0.0160771106299551	0.0359648136807692	83.7443599836373	-0.473834151892455	0.511987500169991	0.833511439433168	83.7443599836373	-0.124131081825977	0.863275491916879	0.983785848380802	83.7443599836373	0.0603633982293318	0.933297253365438	0.959054432100743	83.7443599836373	-0.936048793590313	0.19822284924599	0.274567801310513	83.7443599836373	0.906297934762475	0.214492646368755	0.600750746943941	83.7443599836373	0.479864002956475
ENSG00000130764.5	LRRC47	chr1	3696784	3713068	-	16284	23007	1535	818	852.111111111111	FALSE	838.954447975108	0.56160748666507	0.00879550044993988	0.0611505923313269	838.954447975108	0.0783189333497553	0.715577952072925	0.857582665984532	838.954447975108	-0.292848743276001	0.174069683210296	0.375552944472489	838.954447975108	-0.0791934854713209	0.71318270110722	0.782466938558812	838.954447975108	0.14316345791748	0.505009637295816	0.832218023441968	838.954447975108	-0.294776844619493	0.170462708539455	0.648510887189619	838.954447975108	-0.400067388205973	0.0636860222055712	0.137401715910217	838.954447975108	0.0914561029766165	0.671261645489133	0.739391742193514	838.954447975108	-0.41844402874759	0.0512375697511742	0.487864616754026	838.954447975108	-0.373095777969249
ENSG00000116198.8	CEP104	chr1	3728645	3773778	-	45133	2358	128	86	87.3333333333333	FALSE	86.1590222507844	0.630032936322502	0.00118696992574707	0.0220140011550165	86.1590222507844	0.396112390202767	0.0452955957726698	0.192271994469505	86.1590222507844	0.112191710501497	0.577999513620244	0.760168163746283	86.1590222507844	0.392207860517154	0.0505737135968695	0.0946758290218869	86.1590222507844	0.531897900943964	0.00634763027159516	0.198179456704114	86.1590222507844	0.106871926585597	0.589038116271165	0.932183920644376	86.1590222507844	-0.0558034453872254	0.786176199553842	0.860142243722125	86.1590222507844	0.585177133945256	0.0034503115521095	0.00848496993279896	86.1590222507844	-0.0981350353785383	0.610616712232859	0.85618854847296	86.1590222507844	-0.28924046361717
ENSG00000169598.11	DFFB	chr1	3773845	3801993	+	28148	905	107	24	33.5185185185185	FALSE	28.7550193488326	-2.40743172861914	0.0295675337848554	0.114715640983385	28.7550193488326	-1.00060490136162	0.357996234970366	0.603548294631831	28.7550193488326	-0.885389309801489	0.415563967166088	0.633453866101217	28.7550193488326	-3.41378793129464	0.00287456369463589	0.00837111029289539	28.7550193488326	-0.642088080289479	0.554188533932318	0.854128454709374	28.7550193488326	-0.36290364819161	0.73758056770219	0.96489020068161	28.7550193488326	-0.917710996076892	0.399046928499674	0.544597304859311	28.7550193488326	-1.72920582985581	0.116534284580608	0.175893489268015	28.7550193488326	1.76534364832966	0.11198248487669	NA	28.7550193488326	0.637701253170005
ENSG00000198912.6	C1orf174	chr1	3805689	3816857	-	11168	2609	290	85	96.6296296296296	FALSE	84.2959150632188	-2.05138265808085	0.0164538616514289	0.0839209182558653	84.2959150632188	-1.19015759627313	0.161624264496433	0.396457961731662	84.2959150632188	-0.349812325115607	0.679757325219047	0.828144899111061	84.2959150632188	-3.10937915993333	0.000359132690189895	0.00142282592706498	84.2959150632188	-0.656286325999905	0.439025902613619	0.801841077325468	84.2959150632188	-0.0508739226327654	0.952063870106384	0.99467197405541	84.2959150632188	-0.564247817255805	0.505888600911891	0.641996092697797	84.2959150632188	-1.82367218732852	0.0333168235214246	0.060389370695018	84.2959150632188	1.39509633208095	0.103705654025515	0.524178452878787	84.2959150632188	1.13928367364037
ENSG00000131697.13	NPHP4	chr1	5922871	6052533	-	129662	675	59	22	25	FALSE	22.9936336199174	-0.747074571364263	0.134087791572446	0.282349008422303	22.9936336199174	-0.281111083009552	0.565487780270342	0.761498901945463	22.9936336199174	-0.258002284686165	0.597155750902112	0.774020924416892	22.9936336199174	-0.636104118233063	0.2050300933399	0.2965828964764	22.9936336199174	-0.217921197770906	0.65402182922084	0.893941817174614	22.9936336199174	-0.257469600549727	0.594385585600607	0.933439890287506	22.9936336199174	-0.511841662307654	0.301045433349865	0.443288184917536	22.9936336199174	-1.16703503661234	0.0265649994599927	0.0496552278409452	22.9936336199174	0.529153373593357	0.296970490387977	NA	22.9936336199174	0.0236414824598247
ENSG00000116254.13	CHD5	chr1	6161853	6240183	-	78330	1325	75	51	49.0740740740741	FALSE	48.5863440703808	0.743082118493348	0.00529049215405022	0.0483703568923333	48.5863440703808	0.583901115274312	0.0304290036851108	0.153696790594725	48.5863440703808	0.583517905472242	0.0302560694296359	0.115874721970384	48.5863440703808	1.01328767039608	0.000138363920067878	0.000622276565357466	48.5863440703808	0.206242840776787	0.453199039958017	0.807270408644006	48.5863440703808	0.354164566802135	0.187515580061234	0.671984690662912	48.5863440703808	-0.145000707732365	0.612877773400568	0.733088252830746	48.5863440703808	0.356013767020526	0.2058526926648	0.283541025046768	48.5863440703808	-0.536839277716561	0.0469833020518428	NA	48.5863440703808	-0.229736548472176
ENSG00000116251.5	RPL22	chr1	6241329	6269449	-	28120	23465	1528	840	869.074074074074	TRUE	835.119689511395	-0.264919948792264	0.0275353882308355	0.110307968565834	835.119689511395	-0.219213113115182	0.0682226406944585	0.246384951745243	835.119689511395	-0.0313240062837893	0.793474079746011	0.895177552392168	835.119689511395	-0.108574740772733	0.367294492391462	0.472102720903525	835.119689511395	-0.0143674884328572	0.904267113614591	0.979102407576524	835.119689511395	0.284495152890296	0.0163222666849681	0.20006966148559	835.119689511395	0.327782578892477	0.00587028203031135	0.0204545977578621	835.119689511395	-0.0930101342709561	0.441978421517764	0.533407291067027	835.119689511395	0.250552460359407	0.0384697253975471	0.46324031649653	835.119689511395	0.503708266005478
ENSG00000116237.11	ICMT	chr1	6281253	6296032	-	14779	5840	479	203	216.296296296296	FALSE	199.260906241578	-0.444680933460098	0.0559636215096957	0.165164984733396	199.260906241578	-0.41900115892693	0.0718530720105374	0.254482606645271	199.260906241578	-0.466262678103607	0.0452787015794679	0.15372993361319	199.260906241578	-1.20038731243996	5.67717136067762e-07	4.94642928361568e-06	199.260906241578	-0.225977226008322	0.328814235913199	0.747362651416487	199.260906241578	0.0517195514195035	0.821779639450515	0.977976919626528	199.260906241578	-0.262001484075282	0.259083174754618	0.399377409098487	199.260906241578	-1.31295647619188	6.6975267323475e-08	5.12090397982595e-07	199.260906241578	0.218703707451776	0.351795279002966	0.704343866954547	199.260906241578	0.470720710346433
ENSG00000158292.6	GPR153	chr1	6307406	6321035	-	13629	810	59	26	30	FALSE	30.6687019976447	0.137993274983272	0.677110720965024	0.789855568235496	30.6687019976447	0.0629065922735516	0.851074118176138	0.931027761371561	30.6687019976447	0.403995184190478	0.213441176082418	0.425745975532916	30.6687019976447	1.28911541699079	3.39591689281289e-05	0.000184505774687066	30.6687019976447	-0.09738695338714	0.772481888317476	0.936872122678634	30.6687019976447	-0.171675655215969	0.606452688804575	0.933586150557006	30.6687019976447	-0.12252052947875	0.720564800186734	0.813242551828302	30.6687019976447	1.39677801540902	7.57083980971223e-06	3.73856313124873e-05	30.6687019976447	-0.235380228370412	0.494940134783332	NA	30.6687019976447	-0.23458224748952
ENSG00000097021.15	ACOT7	chr1	6324329	6454451	-	130122	2343	180	88	86.7777777777778	FALSE	82.0601378056987	0.0652468452709319	0.707234786435169	0.81040454184998	82.0601378056987	-0.122181656621065	0.490450713717534	0.708321781726113	82.0601378056987	-0.00133122658393475	0.993927963799198	0.996936010249993	82.0601378056987	-0.301632683886917	0.1004199165779	0.167599926622461	82.0601378056987	-0.135242078139968	0.44173451078379	0.803209984964009	82.0601378056987	0.0273558341316477	0.872939034571467	0.983933086068857	82.0601378056987	-0.590903034987877	0.00153549544207999	0.00682335109854558	82.0601378056987	-1.47763764005693	2.44380404893039e-11	3.37472107205659e-10	82.0601378056987	-0.2004889234109	0.266318177051517	0.641657932943225	82.0601378056987	0.149537490752712
ENSG00000215788.5	TNFRSF25	chr1	6521211	6526255	-	5044	1017	69	33	37.6666666666667	FALSE	37.4858739715479	0.402061095486836	0.262109532069452	0.42869330257475	37.4858739715479	0.0143318286048239	0.968787718874403	0.986183552692349	37.4858739715479	0.181310928168446	0.617015702701192	0.786396141129444	37.4858739715479	0.76669571881628	0.0315395490755165	0.0640076058369585	37.4858739715479	0.129489224054865	0.720766406292265	0.91902096655177	37.4858739715479	-0.446902863104756	0.227011848114811	0.724407729694345	37.4858739715479	-0.635386410845479	0.0978235063831455	0.192409302557308	37.4858739715479	0.778341738527241	0.0301649469099106	0.0554816109973745	37.4858739715479	-0.272571871431971	0.452682833609836	NA	37.4858739715479	-0.46123469170958
ENSG00000171680.16	PLEKHG5	chr1	6526152	6580121	-	53969	1564	117	53	57.9259259259259	FALSE	60.9766578001344	0.557458698947087	0.0546148465054431	0.163068652923563	60.9766578001344	0.133668193700058	0.653795386528035	0.820648921443857	60.9766578001344	0.785809742442864	0.00622207729648102	0.0363989409801609	60.9766578001344	1.45321360489742	2.61294985125684e-07	2.43941374520912e-06	60.9766578001344	-0.237914666810545	0.433604536388647	0.80031787346394	60.9766578001344	-0.350324782224467	0.246087309932299	0.746157053145443	60.9766578001344	0.469379876041272	0.108796643007161	0.208888811526372	60.9766578001344	1.67163215308043	3.01681662259871e-09	2.89809463065029e-08	60.9766578001344	-0.795373365757632	0.00851124740944676	NA	60.9766578001344	-0.483992975924525
ENSG00000162408.10	NOL9	chr1	6581407	6614595	-	33188	7853	670	289	290.851851851852	FALSE	274.795067439769	0.198481227503927	0.126666831918179	0.273281945578105	274.795067439769	-0.0706262301074651	0.591178298931345	0.780653958155891	274.795067439769	-0.861024594452758	3.09130297324409e-10	1.96160714432068e-08	274.795067439769	-1.03935687267857	1.48567301472945e-13	4.47623928948381e-12	274.795067439769	-0.097531358602593	0.457069377736602	0.809126613931349	274.795067439769	-0.548130981229399	3.54814627333761e-05	0.00176730499637862	274.795067439769	-1.07860761940717	1.06083270026416e-14	6.72146718983551e-13	274.795067439769	-0.882255795900992	3.62524514794125e-10	4.09419887808778e-09	274.795067439769	-0.29601258610652	0.0250679514905471	0.456499461396257	274.795067439769	-0.477504751121934
ENSG00000162413.12	KLHL21	chr1	6650784	6674667	-	23883	4592	358	168	170.074074074074	FALSE	163.647872679903	0.227644275745383	0.18916959318553	0.348369117427841	163.647872679903	0.200555668921926	0.248646157204324	0.49990436049191	163.647872679903	-0.685454767508421	0.000156763405841127	0.00193806351238593	163.647872679903	0.0447958238750354	0.799460363481504	0.851749499520292	163.647872679903	0.0362971612764883	0.835064826525881	0.958788881126036	163.647872679903	-0.508906005947428	0.00403363814163746	0.0772396885922	163.647872679903	-1.12601311170203	2.12690468512327e-09	5.40635329548884e-08	163.647872679903	-0.682346539461941	0.000245114951940657	0.000835835196229776	163.647872679903	-0.191347114468895	0.275789559544653	0.648797307829401	163.647872679903	-0.709461674869353
ENSG00000116273.5	PHF13	chr1	6673745	6684093	+	10348	4872	331	178	180.444444444444	FALSE	170.163564796695	-0.390192252014277	0.121276619151948	0.265656753046992	170.163564796695	-0.0290505831700797	0.90744173581715	0.956738705192265	170.163564796695	-0.0706843257871876	0.777341462171898	0.885322677707539	170.163564796695	-0.387031482109045	0.126893853690633	0.201386933972476	170.163564796695	-0.0419983360415298	0.866299786114974	0.966330777599059	170.163564796695	0.285680713432395	0.247562895208157	0.74824604279505	170.163564796695	0.106184462641239	0.670189464016841	0.777885588824504	170.163564796695	-0.195330189511397	0.440956412880566	0.532322976995214	170.163564796695	0.348193915972747	0.170176155075794	0.561277693349369	170.163564796695	0.314731296602474
ENSG00000041988.11	THAP3	chr1	6684926	6695646	+	10720	7271	346	260	269.296296296296	FALSE	275.243282170904	0.40113670903515	0.095527714159064	0.22916545459595	275.243282170904	0.392079980202873	0.103562735075538	0.311728955641091	275.243282170904	0.0651258852198569	0.787992241700852	0.892264014025788	275.243282170904	0.63065694030767	0.00877805287459424	0.0213854909868189	275.243282170904	0.401451590300091	0.0950711145985668	0.550646094398707	275.243282170904	0.0413901974122225	0.863698624775466	0.983785848380802	275.243282170904	0.80222574981499	0.000812035298659657	0.00399161903511139	275.243282170904	1.09073524859563	5.37029835844574e-06	2.73983783035683e-05	275.243282170904	0.000314881264940802	0.998956017946201	0.999719044227541	275.243282170904	-0.350689782790651
ENSG00000007923.11	DNAJC11	chr1	6694228	6761984	-	67756	2970	191	110	110	FALSE	106.56255131066	0.418877466409321	0.0220531497082538	0.0985132146376481	106.56255131066	0.348980385655125	0.0580029000505195	0.222533833363903	106.56255131066	-0.48324415100322	0.0130212107167151	0.0623700793473783	106.56255131066	0.0299090674517788	0.874950831679441	0.909134368332539	106.56255131066	0.32333583722474	0.0779123370746443	0.527198386553656	106.56255131066	0.0131013022993272	0.94340352927812	0.993959434783605	106.56255131066	-0.49965910677115	0.0107945313653866	0.0337664819578664	106.56255131066	-0.232945349747727	0.236135790200867	0.318482094875703	106.56255131066	-0.0955416291845814	0.602991134785528	0.852300394594813	106.56255131066	-0.335879083355798
ENSG00000171735.14	CAMTA1	chr1	6845384	7829766	+	984382	2922	208	93	108.222222222222	TRUE	106.768824726583	-0.178055477438531	0.40480814082966	0.566915610194893	106.768824726583	-0.228951715702454	0.287318432173849	0.538925322168493	106.768824726583	0.434281819057909	0.0356289357005248	0.129815872698276	106.768824726583	0.356404182722341	0.0893599015142207	0.152116608326361	106.768824726583	-0.465496247538706	0.032212565178463	0.397081864508558	106.768824726583	0.177971844489116	0.389014122488007	0.848077641620209	106.768824726583	1.01973051801136	4.66834698256791e-07	6.52682809556825e-06	106.768824726583	0.722375794743595	0.000503860790429224	0.0015817007035077	106.768824726583	-0.287440770100175	0.20016813524983	0.58496209906705	106.768824726583	0.40692356019157
ENSG00000049245.8	VAMP3	chr1	7831329	7841492	+	10163	3330	235	124	123.333333333333	FALSE	120.149104709709	0.200301962498649	0.236406977048767	0.400503620402792	120.149104709709	-0.0359692657108317	0.834525269627192	0.925948533359961	120.149104709709	0.185339164139463	0.274242592589901	0.497400214764719	120.149104709709	0.16075448317757	0.35010421349232	0.454686964229588	120.149104709709	-0.174582067228316	0.311935494494389	0.734614694213358	120.149104709709	-0.381095989119942	0.0274323706357771	0.27359344649131	120.149104709709	-0.458936482498158	0.0100808771501755	0.0320187683019029	120.149104709709	-0.356670921760201	0.0495358774301305	0.0850877806878035	120.149104709709	-0.374884029726966	0.0320037284036793	0.456499461396257	120.149104709709	-0.34512672340911
ENSG00000116288.8	PARK7	chr1	8014351	8045565	+	31214	38340	2207	1397	1420	FALSE	1379.04569075287	0.0859382073451287	0.597870324152233	0.730447835420359	1379.04569075287	0.19330271924567	0.235277556723693	0.484156798481384	1379.04569075287	-0.0188984973279951	0.907734595833257	0.957398899913731	1379.04569075287	-0.105885801721871	0.517049292321809	0.612933519319993	1379.04569075287	0.242982031533313	0.135426517536288	0.605947748854197	1379.04569075287	0.103907280775114	0.523015787496248	0.913836727448373	1379.04569075287	-0.0475493460488552	0.770731981019458	0.84988985054175	1379.04569075287	-0.27382044416166	0.0949739491348873	0.147910811439603	1379.04569075287	0.157043824188184	0.335504547531978	0.69478793342724	1379.04569075287	-0.0893954384705553
ENSG00000116285.8	ERRFI1	chr1	8064464	8086368	-	21904	7656	583	262	283.555555555556	FALSE	283.945516102091	-0.0948653146222185	0.562659375409107	0.702468246580742	283.945516102091	0.107636270922762	0.507982606753657	0.720778218738064	283.945516102091	1.19087175837623	2.69029998423614e-14	3.35975579190765e-12	283.945516102091	1.31088876512421	6.2234988858561e-17	2.86780159889957e-15	283.945516102091	-0.0481554719941816	0.767784102495359	0.935123054586927	283.945516102091	0.422589617383743	0.00774428429867485	0.12178207773429	283.945516102091	0.821498034369772	2.11579989065115e-07	3.24410100671548e-06	283.945516102091	1.25241887747488	2.10868703096712e-15	5.64302985895766e-14	283.945516102091	0.0467098426280369	0.779659330754739	0.92725139636226	283.945516102091	0.314953346460981
ENSG00000142599.13	RERE	chr1	8412457	8877702	-	465245	3365	251	131	124.62962962963	FALSE	121.761527163451	0.155189704936816	0.635677733291492	0.760888321679787	121.761527163451	0.29497369139884	0.367123201637477	0.612674723818034	121.761527163451	-0.29682811272248	0.369508442140736	0.591788387018609	121.761527163451	0.391326843779689	0.232210723240824	0.327435739186087	121.761527163451	0.0656916224186087	0.841200626774658	0.96060530933204	121.761527163451	-0.289814672101582	0.378108231432095	0.842990589974221	121.761527163451	-0.476090024647528	0.152577259048628	0.269951285927252	121.761527163451	0.614562384468236	0.060488278412175	0.100778711345265	121.761527163451	-0.0894980825182078	0.785821748996104	0.928735849758053	121.761527163451	-0.584788363500422
ENSG00000074800.9	ENO1	chr1	8921061	8939308	-	18247	186852	9236	6711	6920.44444444444	FALSE	6889.3307636585	0.199190177220431	0.222035897687608	0.386990964881496	6889.3307636585	0.37335143146914	0.022065715671699	0.127718923526007	6889.3307636585	0.53355637229971	0.00106672425354261	0.00922887840640227	6889.3307636585	0.4784643641267	0.00335254430300941	0.00949979423184218	6889.3307636585	0.128676933647991	0.43022358723831	0.798643804379319	6889.3307636585	0.342048028700144	0.0359081356663846	0.316057614951212	6889.3307636585	0.692779101309579	2.14427151243824e-05	0.000181326669506186	6889.3307636585	0.573326891840534	0.000440654763947606	0.0014115695542515	6889.3307636585	-0.0705132435724399	0.665657464649022	0.883771535813391	6889.3307636585	-0.0313034027689956
ENSG00000180758.10	GPR157	chr1	9160364	9189229	-	28865	725	58	27	26.8518518518519	FALSE	25.6890953174644	0.134336752083481	0.675488530562677	0.78849697478442	25.6890953174644	0.399520686582059	0.204105957980512	0.449701109669669	25.6890953174644	0.220620097558085	0.488959972849308	0.694587551276375	25.6890953174644	-0.545960171136514	0.127048415890714	0.201579119817765	25.6890953174644	0.226633850181708	0.47394371211156	0.818103559147699	25.6890953174644	0.777068074830365	0.00954522105303754	0.139408762396652	25.6890953174644	0.469392280378643	0.134615655513329	0.246279240807638	25.6890953174644	-0.0310577954625851	0.927275052987181	0.944595003143462	25.6890953174644	0.0922970980982275	0.776686299997056	NA	25.6890953174644	0.377547388248306
ENSG00000049239.8	H6PD	chr1	9294834	9331396	+	36562	1040	97	33	38.5185185185185	FALSE	39.9862742713607	-0.0558472230481433	0.848167656697501	0.905259241124048	39.9862742713607	0.383058831227227	0.168028802876547	0.404103877864137	39.9862742713607	1.20832666133047	2.54357089662106e-06	6.05468243540986e-05	39.9862742713607	1.89939245411757	2.42441181918849e-14	8.25737416835858e-13	39.9862742713607	-0.198985704158993	0.499622775888003	0.830237535234251	39.9862742713607	-0.0967635245913307	0.733314266751941	0.96335857634171	39.9862742713607	0.857896844453266	0.00124655949044567	0.00572435119072324	39.9862742713607	1.9162295798678	2.3397667181055e-14	5.39084754275805e-13	39.9862742713607	-0.143138481110849	0.645608112097868	NA	39.9862742713607	-0.479822355818558
ENSG00000171612.6	SLC25A33	chr1	9599541	9645237	+	45696	1015	92	35	37.5925925925926	FALSE	34.7992622293714	-0.582663272018368	0.0378906709087793	0.131217507011229	34.7992622293714	-0.474041875558443	0.089361675411724	0.287003189348798	34.7992622293714	-0.31831578087113	0.246389469965157	0.466056020497671	34.7992622293714	-1.31335938567507	3.01701319142481e-05	0.000166331431033318	34.7992622293714	-0.219512410985753	0.417769289190312	0.794906210157855	34.7992622293714	-0.241011547056094	0.367730348544739	0.839330891747167	34.7992622293714	-0.39993075528858	0.150445278521735	0.267186101612075	34.7992622293714	-0.933174916932368	0.00217932812106061	0.00565981628064475	34.7992622293714	0.363150861032615	0.211219198731788	NA	34.7992622293714	0.233030328502349
ENSG00000188807.8	TMEM201	chr1	9648932	9674935	+	26003	1225	113	36	45.3703703703704	FALSE	42.2197492530331	0.184220343393164	0.516772656471037	0.664835237654829	42.2197492530331	0.161816653683655	0.570241897584453	0.765743249413313	42.2197492530331	-1.05133241752779	0.000647580629352549	0.00611864285431021	42.2197492530331	-0.733289091854771	0.0163507628107701	0.0365390360841302	42.2197492530331	-0.0284660417672845	0.920811701726012	0.985301434575932	42.2197492530331	-0.700418659900755	0.0172349113702271	0.206048811163836	42.2197492530331	-2.44328668685713	4.71586831024255e-11	1.68616751989046e-09	42.2197492530331	-1.45242403709892	1.41991255521314e-05	6.65328248410637e-05	42.2197492530331	-0.212686385160448	0.462279521585906	NA	42.2197492530331	-0.86223531358441
ENSG00000171608.11	PIK3CD	chr1	9711790	9789172	+	77382	5362	269	194	198.592592592593	FALSE	199.138626871351	0.623053662741272	0.000180281455350057	0.00746867933053577	199.138626871351	0.602579464506183	0.000304401571250284	0.00714721618382479	199.138626871351	0.500306077778126	0.0028051789907615	0.0199935710201753	199.138626871351	0.899313250717313	6.10428894488729e-08	6.60812284398163e-07	199.138626871351	0.696808892542442	2.56708176395553e-05	0.00307229771666734	199.138626871351	0.304763370209808	0.0678446107294517	0.437649061679454	199.138626871351	0.371967055528935	0.0277313059174578	0.0716094285558088	199.138626871351	1.0319866245304	5.52869536799048e-10	6.03812015031356e-09	199.138626871351	0.07375522980117	0.653404641953934	0.876937808938174	199.138626871351	-0.297816094296375
ENSG00000171603.12	CLSTN1	chr1	9789084	9884584	-	95500	9653	579	344	357.518518518519	FALSE	357.354716978989	0.370145437173537	0.116604715246942	0.259853657113683	357.354716978989	0.574808149394206	0.0146492339274458	0.0989282513736679	357.354716978989	0.271983166971492	0.249572027341317	0.468736303313018	357.354716978989	0.777995796356727	0.000951861471475384	0.00327563510371541	357.354716978989	0.0373916616811094	0.874509299831032	0.969535705924243	357.354716978989	-0.141613708080357	0.54960754874113	0.919476815765587	357.354716978989	-0.416495448268112	0.0814582245030593	0.16668855866608	357.354716978989	0.664913089576359	0.00488672193515551	0.0114925990489179	357.354716978989	-0.332753775492428	0.160207151406974	0.557837695905234	357.354716978989	-0.716421857474563
ENSG00000178585.10	CTNNBIP1	chr1	9908334	9970394	-	62060	15100	940	568	559.259259259259	FALSE	534.296073889243	-0.516284551378016	8.06973348168671e-05	0.00429240082788237	534.296073889243	0.0897849638629243	0.485459848589356	0.703888190357476	534.296073889243	0.203191893002556	0.113189840103466	0.28477572326177	534.296073889243	-0.255040059495957	0.051232537287312	0.0957221972690302	534.296073889243	-0.105809104042148	0.412386374586716	0.791977905361563	534.296073889243	0.248407882898364	0.0512506370245541	0.383910425689657	534.296073889243	0.320750772966294	0.0122896213562736	0.0374336045341144	534.296073889243	-0.373112398681351	0.00481900255630623	0.011342623607673	534.296073889243	0.410475447335868	0.00194192763002192	0.194898615124454	534.296073889243	0.15862291903544
ENSG00000162441.7	LZIC	chr1	9982173	10003465	-	21292	2052	137	76	76	FALSE	73.403292170442	-0.320385535310662	0.102224438108718	0.239691968213013	73.403292170442	-0.304658011747686	0.121357810659054	0.339415856685838	73.403292170442	-0.150851477889378	0.434906393215275	0.65006275683278	73.403292170442	-0.383308880346486	0.0582193583830586	0.106512996005693	73.403292170442	-0.135193653114306	0.480469636270801	0.8211437635354	73.403292170442	0.0602957543758239	0.745491815929468	0.967114396870023	73.403292170442	0.37998422633733	0.0409468337230389	0.097334859639014	73.403292170442	0.0950957667374119	0.626458925597883	0.700609547290975	73.403292170442	0.185191882196356	0.362465107302287	NA	73.403292170442	0.36495376612351
ENSG00000130939.14	UBE4B	chr1	10092890	10241297	+	148407	1244	88	48	46.0740740740741	FALSE	43.5877760028542	-0.139615533513304	0.609636561767888	0.739996936576122	43.5877760028542	0.134741588070161	0.616883170295794	0.796117652808703	43.5877760028542	-0.436285312600546	0.119428601944769	0.295978217704363	43.5877760028542	-0.630201645881728	0.0303336007442341	0.0618369145051018	43.5877760028542	0.0245887510536917	0.927316831403759	0.986556251778905	43.5877760028542	-0.0141097155037656	0.957862265444626	0.995488007933292	43.5877760028542	-0.511126762709183	0.0715192563827564	0.15077949327908	43.5877760028542	-0.246707403076291	0.385994574962389	0.478302452178732	43.5877760028542	0.164204284566995	0.556019899601662	NA	43.5877760028542	-0.148851303573926
ENSG00000054523.12	KIF1B	chr1	10270863	10441661	+	170798	5764	357	201	213.481481481481	FALSE	213.94168822733	0.407505297581125	0.044494042761221	0.144517590076684	213.94168822733	0.385086638017052	0.0580397965371885	0.222576291393393	213.94168822733	0.292481996655119	0.150730947608762	0.34315682312938	213.94168822733	0.760178441089954	0.000170238637223485	0.000748060345208962	213.94168822733	0.0673110391710443	0.742049434836768	0.926364648866919	213.94168822733	0.00525423204083768	0.979418662366038	0.998113186536832	213.94168822733	-0.0223266671871841	0.913680400673741	0.947594442028878	213.94168822733	0.722074361254093	0.000384039703017718	0.00125019649448571	213.94168822733	-0.340194258410081	0.0965186407715135	0.522420750539714	213.94168822733	-0.379832405976215
ENSG00000142657.16	PGD	chr1	10458649	10480201	+	21552	3401	188	124	125.962962962963	FALSE	123.963735798041	0.455743031552416	0.0227701822317462	0.100095144784742	123.963735798041	0.443555268396602	0.0270342916453134	0.143056080134246	123.963735798041	-0.154823618529618	0.453066363642999	0.665883140970786	123.963735798041	0.257280541831331	0.207444080976134	0.29922089818737	123.963735798041	0.224642571023375	0.265381989196266	0.699968350445127	123.963735798041	0.166845031261714	0.405313205578228	0.858178399423057	123.963735798041	0.13308389207435	0.513837018286926	0.649425595285414	123.963735798041	0.0135938102327324	0.948147729965291	0.960182041263476	123.963735798041	-0.231100460529041	0.251742316992487	0.629199795332008	123.963735798041	-0.276710237134889
ENSG00000175279.17	APITD1	chr1	10490159	10512210	+	22051	2421	224	78	89.6666666666667	FALSE	81.3062063016117	-0.731920304681472	0.00179233077989444	0.0275758177927948	81.3062063016117	-0.712662897415663	0.00239833514031712	0.0313128089456252	81.3062063016117	-0.823539258212491	0.000480033871606883	0.00476549754796833	81.3062063016117	-1.93022993036313	2.36290248231715e-13	6.83259419131773e-12	81.3062063016117	-0.249270716833175	0.275824443282671	0.706533658670266	81.3062063016117	-0.151769127851739	0.502479524056548	0.904957664356205	81.3062063016117	-0.953648741867778	6.4457873104141e-05	0.000467930490765276	81.3062063016117	-2.40335054627108	3.92764209756051e-17	1.30673714110729e-15	81.3062063016117	0.482649587848297	0.0433862118365914	0.466698755230285	81.3062063016117	0.560893769563924
ENSG00000160049.7	DFFA	chr1	10516579	10532583	-	16004	10182	776	356	377.111111111111	FALSE	365.561466262655	0.255983678892777	0.181015427489271	0.339015418099337	365.561466262655	-0.0942932756917222	0.624179748159817	0.800909451061637	365.561466262655	-0.438687559553344	0.023437246831504	0.0961545095952573	365.561466262655	-0.329666223780081	0.0892280226198643	0.151964958480761	365.561466262655	-0.107864557940581	0.574735336529852	0.859343539976838	365.561466262655	-0.66318112633859	0.000606493413507223	0.0178367021986066	365.561466262655	-0.927677361158664	2.25337160851455e-06	2.56164949215961e-05	365.561466262655	-0.377583982454706	0.0528748982846357	0.08998716048292	365.561466262655	-0.363848236833358	0.0589438962855138	0.492395966485266	365.561466262655	-0.568887850646868
ENSG00000142655.8	PEX14	chr1	10532345	10690815	+	158470	1195	70	46	44.2592592592593	FALSE	43.7367190678641	0.293216587923192	0.256096633016606	0.421786063972495	43.7367190678641	0.151746130600834	0.561981877824586	0.759027874798504	43.7367190678641	-0.180684364916951	0.500558974422525	0.703870215828801	43.7367190678641	0.332399639187398	0.204118875687434	0.295413562613137	43.7367190678641	0.00944189746010785	0.971307431711362	0.992086093406873	43.7367190678641	-0.537328351150449	0.0469575620374147	0.367399395906998	43.7367190678641	-0.179293825240417	0.506319417264049	0.6421775711752	43.7367190678641	0.0486422102291148	0.857851347623264	0.890937093222811	43.7367190678641	-0.283774690463085	0.284399645856693	NA	43.7367190678641	-0.689074481751283
ENSG00000130940.10	CASZ1	chr1	10696661	10856707	-	160046	3649	226	135	135.148148148148	FALSE	132.843106246139	0.256807700042983	0.180587094846212	0.338565737017791	132.843106246139	0.458277880841219	0.0161693178283521	0.105314445749743	132.843106246139	0.104551314233878	0.588707138518157	0.768037761182582	132.843106246139	0.342855050617761	0.0758142156028205	0.132907088632747	132.843106246139	0.15724297228518	0.41343446858384	0.792738054247208	132.843106246139	-0.297689446015624	0.126326278480148	0.571419181975559	132.843106246139	-0.413365455094958	0.0388180329314744	0.0933040417769917	132.843106246139	0.273305593673708	0.16219603850182	0.231321294897415	132.843106246139	-0.099564727757803	0.607384560453931	0.855063333537404	132.843106246139	-0.755967326856843
ENSG00000120948.11	TARDBP	chr1	11072414	11085796	+	13382	17935	1137	651	664.259259259259	FALSE	628.649754521535	0.109797295035628	0.392566006934863	0.556851195166202	628.649754521535	-0.0103278035940657	0.936128109423969	0.971062467666587	628.649754521535	-0.0813770309822399	0.528185875034017	0.726629984355036	628.649754521535	-0.726022955185015	4.17908693955041e-08	4.6683890204593e-07	628.649754521535	0.31291913421572	0.014383815112425	0.28435835280083	628.649754521535	0.11962101520498	0.349380498863376	0.828571288646602	628.649754521535	-0.158817686139972	0.219840829962527	0.354617826991219	628.649754521535	-0.772222561967294	7.58881544740425e-09	6.74152811446211e-08	628.649754521535	0.203121839180092	0.114261729833648	0.530161071357132	628.649754521535	0.129948818799046
ENSG00000116649.5	SRM	chr1	11114641	11120081	-	5440	12851	1021	460	475.962962962963	FALSE	456.773465026958	0.585911401703938	0.0334294508985344	0.123525548195828	456.773465026958	0.256205386213817	0.353188264604602	0.599689315487263	456.773465026958	-0.960522803262934	0.000565893420319496	0.00548515590876613	456.773465026958	-0.483173744414824	0.0820053361217722	0.141636446571447	456.773465026958	0.258741175926669	0.348234802537606	0.760351286035941	456.773465026958	-0.491745292075255	0.0755760470099911	0.461764873033626	456.773465026958	-1.55061201190162	3.5368491917024e-08	6.56832532002146e-07	456.773465026958	-0.408400344504997	0.142045307056393	0.207232537444862	456.773465026958	-0.327170225777269	0.235295157374445	0.619005921450149	456.773465026958	-0.747950678289073
ENSG00000171824.9	EXOSC10	chr1	11126675	11159938	-	33263	3201	237	110	118.555555555556	FALSE	114.205617349642	0.0957690231688119	0.634072081222296	0.759493901013695	114.205617349642	-0.447330502430911	0.0309967803720652	0.155037349944126	114.205617349642	-0.292233656875754	0.15444168658524	0.348538974361237	114.205617349642	-0.364993818066362	0.0803126512398923	0.139246300952546	114.205617349642	-0.108826961134428	0.59121514056031	0.86685696865937	114.205617349642	-0.0963249227367223	0.631365684353252	0.934756649551881	114.205617349642	-0.35178565984579	0.0886982703083326	0.178119143793355	114.205617349642	-0.105052403870556	0.612691630536393	0.68833947592335	114.205617349642	-0.20459598430324	0.318911360851992	0.681861283175529	114.205617349642	0.351005579694189
ENSG00000198793.8	MTOR	chr1	11166592	11322564	-	155972	2485	189	88	92.037037037037	TRUE	86.8448566862318	0.0357466370546385	0.868573039905776	0.918680972734513	86.8448566862318	0.138569002790158	0.519996923061018	0.730368946376006	86.8448566862318	-0.0300792518159117	0.889789612643168	0.94855057133582	86.8448566862318	-0.377657298477871	0.0937973039789089	0.158072161415723	86.8448566862318	0.324656888681082	0.126544099496031	0.592837035085815	86.8448566862318	0.107502880030296	0.613220320425176	0.934212023933782	86.8448566862318	-0.483265544180492	0.0314607809202027	0.0788762144862922	86.8448566862318	-0.663234340293949	0.0046310803560708	0.01096620484426	86.8448566862318	0.288910251626443	0.182525149056956	0.567923508712991	86.8448566862318	-0.0310661227598621
ENSG00000120942.9	UBIAD1	chr1	11333263	11356106	+	22843	2156	219	72	79.8518518518518	FALSE	74.3912610002756	-0.215680051798377	0.235693021262345	0.399954069361486	74.3912610002756	-0.785280764465014	4.03261800287168e-05	0.00138996277322981	74.3912610002756	-0.984519969297627	4.17875356741917e-07	1.28601141037325e-05	74.3912610002756	-1.01339007107072	3.93174271626709e-07	3.53855739298907e-06	74.3912610002756	-0.340121988722477	0.0628120791533587	0.499466181454495	74.3912610002756	-0.668711700335645	0.000293039502024196	0.0101819410844455	74.3912610002756	-1.90011100398412	8.52908384913473e-18	9.30317918075873e-16	74.3912610002756	-1.43771197275572	2.35847057624702e-11	3.26735385136986e-10	74.3912610002756	-0.1244419369241	0.511019830492144	NA	74.3912610002756	0.116569064129369
ENSG00000116661.9	FBXO2	chr1	11708424	11715842	-	7418	458	38	13	16.962962962963	FALSE	17.7893844819397	-0.173439320360646	0.71043746052183	0.81341732336926	17.7893844819397	0.632304040896649	0.137512931704147	0.363120212108147	17.7893844819397	1.31266462392299	0.00105338708124802	0.009168723716277	17.7893844819397	1.5571157500318	9.84117057404039e-05	0.000465941576024759	17.7893844819397	0.296776099776482	0.496293555793164	0.827623886838396	17.7893844819397	0.344243102735299	0.418490059073326	0.865008559939975	17.7893844819397	1.53384190363404	0.000109669274224152	0.000735424230342034	17.7893844819397	2.09862772919589	7.65748945256957e-08	5.77798481723222e-07	17.7893844819397	0.470215420137128	0.318896780690841	NA	17.7893844819397	-0.28806093816135
ENSG00000132879.9	FBXO44	chr1	11714432	11723384	+	8952	707	53	23	26.1851851851852	FALSE	27.2239644087091	0.607438722349542	0.0849612117466067	0.213692574903827	27.2239644087091	0.144394895245723	0.69621260807864	0.84520485260829	27.2239644087091	0.563693557250832	0.111751672910496	0.282477021258358	27.2239644087091	1.02137416327786	0.00330340693789109	0.00937597417121459	27.2239644087091	0.638105696058347	0.068431266455891	0.515447747421689	27.2239644087091	0.206055190747337	0.564145561281743	0.926127319787537	27.2239644087091	0.927099441919965	0.00742597983557008	0.0247255286874449	27.2239644087091	2.04800354520587	5.82391784083145e-10	6.3204911882172e-09	27.2239644087091	0.0306669737088051	0.929299805639796	NA	27.2239644087091	0.0616602955016139
ENSG00000116670.10	MAD2L2	chr1	11734537	11751707	-	17170	3613	220	140	133.814814814815	FALSE	130.260856026519	0.370036253074024	0.0476992952236623	0.150283300527348	130.260856026519	0.13537886784876	0.474658475737963	0.695131926486072	130.260856026519	0.111611514890626	0.555533122889416	0.745431885475333	130.260856026519	0.250890857038217	0.186774087630855	0.274808972457116	130.260856026519	0.298006518711062	0.111204476403974	0.572088939207787	130.260856026519	-0.00532018691332958	0.977421820238333	0.998113186536832	130.260856026519	-0.276204885029254	0.155280862713238	0.273351418590393	130.260856026519	-0.334606593001752	0.0936816678116729	0.146307182347316	130.260856026519	-0.0720297343629626	0.701170356567631	0.893394936882053	130.260856026519	-0.140699054762089
ENSG00000177674.11	AGTRAP	chr1	11796141	11814859	+	18718	3281	179	120	121.518518518519	FALSE	120.910729001297	0.545735779919185	0.00926172691202197	0.0628764827088149	120.910729001297	0.523586017658274	0.0127790298086374	0.0904963219645644	120.910729001297	0.0758770817609837	0.723341395499027	0.853606245551235	120.910729001297	0.409813701747157	0.0544060969707196	0.10060457888341	120.910729001297	0.506926773657193	0.0156187229209438	0.292366490615083	120.910729001297	-0.0428405409703218	0.840458543966855	0.980440289108405	120.910729001297	0.216096296123486	0.31150608197347	0.454264327020713	120.910729001297	0.410382518066283	0.0561669334964336	0.0947661608896082	120.910729001297	-0.038809006261992	0.852592493251732	0.952297537534737	120.910729001297	-0.566426558628595
ENSG00000011021.17	CLCN6	chr1	11866207	11903201	+	36994	1038	74	37	38.4444444444444	FALSE	36.7472365031267	-0.416466368875508	0.274456718757028	0.440818927405276	36.7472365031267	-0.0168635099153254	0.96403319477659	0.983831751296842	36.7472365031267	0.327667731317244	0.373320163925422	0.595061016009131	36.7472365031267	0.428425279493066	0.246472671802334	0.343721478058053	36.7472365031267	-0.196170190899076	0.601415928590598	0.871655749201013	36.7472365031267	-0.147506657691804	0.691116491602078	0.953088406470476	36.7472365031267	-0.104539092019808	0.781161811767535	0.8576527158952	36.7472365031267	-0.0834639788969514	0.827326185623053	0.867072457007279	36.7472365031267	0.220296177976431	0.572275208082828	NA	36.7472365031267	-0.130643147776479
ENSG00000116685.11	KIAA2013	chr1	11979648	11986485	-	6837	15043	994	548	557.148148148148	FALSE	527.640535027012	-0.518511110071172	0.0457771605477329	0.146913144297883	527.640535027012	0.0742204094251899	0.774030202544653	0.893837879298751	527.640535027012	-0.0143411509761855	0.955777647467215	0.981317069951684	527.640535027012	-0.238732294153041	0.357548000786359	0.462264234475027	527.640535027012	-0.146247765065776	0.571924524752469	0.857597518153613	527.640535027012	0.0710449197186699	0.783105940174683	0.974162535944167	527.640535027012	0.143833493537689	0.577863803519151	0.703909018225124	527.640535027012	-0.140022877376304	0.58978129253122	0.668351577819769	527.640535027012	0.372263345005395	0.152841445308303	0.555438393732951	527.640535027012	-0.00317548970651999
ENSG00000083444.12	PLOD1	chr1	11994262	12035595	+	41333	12970	754	474	480.37037037037	FALSE	492.920823203566	0.365525808665593	0.0771222674088525	0.199146523749211	492.920823203566	0.868290203373448	2.40447632569214e-05	0.000941789659022233	492.920823203566	0.943094906683575	4.38399940116192e-06	9.69059107531616e-05	492.920823203566	1.23799740540824	1.60496281872893e-09	2.43485292411746e-08	492.920823203566	0.182544214581536	0.378446060827866	0.776815080074732	492.920823203566	0.362597991514415	0.0785336413691262	0.468522849087605	492.920823203566	0.79654029175992	0.000108925173072854	0.000732715235260564	492.920823203566	1.44745123834461	1.72395141839671e-12	2.87336351495638e-11	492.920823203566	-0.182981594084057	0.377832772625007	0.719568367334464	492.920823203566	-0.505692211859033
ENSG00000116688.12	MFN2	chr1	12040238	12073571	+	33333	5067	450	184	187.666666666667	FALSE	179.838854802257	0.203037110481223	0.164280508702392	0.318901812004621	179.838854802257	0.172784354885625	0.238204791617417	0.486900313840335	179.838854802257	-0.164178795847453	0.269863258328426	0.491721044901881	179.838854802257	-0.0150301571365013	0.919820541929565	0.943245699132103	179.838854802257	-0.392832481387373	0.00889733853284723	0.236141001362655	179.838854802257	-0.978758947351168	2.17449575333628e-10	2.8827122933075e-08	179.838854802257	-1.39852283312794	2.48742975285088e-17	2.42949519474135e-15	179.838854802257	-1.05079842835223	1.5784354608279e-10	1.88384741910721e-09	179.838854802257	-0.595869591868596	8.43563293181093e-05	0.0315492671649729	179.838854802257	-1.15154330223679
ENSG00000116691.6	MIIP	chr1	12079523	12092102	+	12579	975	63	36	36.1111111111111	FALSE	36.8896509046038	0.89044102618053	0.0106909520449162	0.0672437472781338	36.8896509046038	0.659680490133919	0.0618213558998779	0.231802752401806	36.8896509046038	0.036282281546524	0.920980637783494	0.965108860000045	36.8896509046038	1.01799398941479	0.00366891375226275	0.0102413442835271	36.8896509046038	0.597651073161317	0.0901451014864748	0.548375700433083	36.8896509046038	0.16532999642724	0.643258448610767	0.939393384950652	36.8896509046038	-0.265684717886135	0.479969623447187	0.61896112619641	36.8896509046038	0.977700707342605	0.00573446716401592	0.0132087419279137	36.8896509046038	-0.292789953019212	0.396425955674986	NA	36.8896509046038	-0.49435049370668
ENSG00000028137.12	TNFRSF1B	chr1	12227060	12269285	+	42225	622	49	21	23.037037037037	FALSE	23.5927887742623	0.764905835615345	0.0298528628863113	0.115303504926645	23.5927887742623	1.07014079112148	0.00197145323461107	0.0276227845896643	23.5927887742623	0.68180436312598	0.0547413629759225	0.175254925373081	23.5927887742623	1.83914562089082	3.93976598141767e-08	4.42620123362139e-07	23.5927887742623	-0.108007067988163	0.776211941744444	0.93858619132664	23.5927887742623	-0.0122026752614074	0.973602562854239	0.998113186536832	23.5927887742623	-0.0666757865719562	0.862374349094874	0.913994517807188	23.5927887742623	0.263411203670284	0.491233074127813	0.5791774580661	23.5927887742623	-0.872912903603507	0.0187870799927998	NA	23.5927887742623	-1.08234346638289
ENSG00000048707.9	VPS13D	chr1	12290124	12572099	+	281975	3441	207	123	127.444444444444	FALSE	121.592731085819	-0.155548096768954	0.5218619715067	0.66874449528458	121.592731085819	0.188590711015997	0.432939260037617	0.664645270585752	121.592731085819	-0.0322694717437248	0.893921017364375	0.949223601299796	121.592731085819	-0.0535164063235452	0.826431877706265	0.872481620272203	121.592731085819	0.0271923204225258	0.910174019426258	0.982270999937289	121.592731085819	0.00380646937748926	0.987333286090299	0.998910881704753	121.592731085819	-0.0541547803125711	0.823438673179586	0.885507431272744	121.592731085819	-0.22444548208272	0.365002673514413	0.457057408558268	121.592731085819	0.18274041719148	0.456347460381715	0.771633814664684	121.592731085819	-0.184784241638508
ENSG00000162496.4	DHRS3	chr1	12627939	12677737	-	49798	1741	123	60	64.4814814814815	FALSE	62.7008483565362	-0.162447213188085	0.480155365143463	0.634002265007849	62.7008483565362	-0.0856706547508646	0.709071158929962	0.85383820241748	62.7008483565362	-0.234152225739472	0.311887720258384	0.538738289489336	62.7008483565362	-0.371440850584968	0.118579084719621	0.190975632233355	62.7008483565362	-0.454043540084792	0.052431744943772	0.475931821902944	62.7008483565362	-0.374555437263161	0.10277155945418	0.524323580708509	62.7008483565362	-0.28225179199526	0.226697149357719	0.362628877867603	62.7008483565362	-0.33579654084988	0.162688972817818	0.231909161087037	62.7008483565362	-0.291596326896706	0.227527208709887	NA	62.7008483565362	-0.288884782512296
ENSG00000116731.18	PRDM2	chr1	14026693	14151574	+	124881	4055	227	143	150.185185185185	FALSE	152.578369681626	0.243021192870142	0.186352657280408	0.345282532425177	152.578369681626	0.196456446628163	0.287730199304768	0.539255328014596	152.578369681626	0.0792367561912796	0.669607357520616	0.82264137435916	152.578369681626	1.00408056748121	2.33937394224685e-08	2.74263745038655e-07	152.578369681626	0.0022146262423584	0.990489166094417	0.99696824485873	152.578369681626	-0.25586506532894	0.169959763057367	0.647852004416896	152.578369681626	0.160034562885597	0.388360770225428	0.533988312914076	152.578369681626	1.12049487650672	5.03874666078606e-10	5.53812244591753e-09	152.578369681626	-0.240806566627784	0.199094268254273	0.584840101122469	152.578369681626	-0.452321511957103
ENSG00000171729.9	TMEM51	chr1	15479028	15546976	+	67948	3358	206	130	124.37037037037	FALSE	121.115582536593	0.360693984296842	0.0626346773418956	0.175519679562639	121.115582536593	0.34869035829897	0.0726769328974297	0.255719530737914	121.115582536593	0.253412981908323	0.193573688761938	0.401262858750479	121.115582536593	0.181466858253173	0.359193693580182	0.463835165230096	121.115582536593	0.484926105216652	0.0116829546593629	0.268503880805009	121.115582536593	0.149651290670101	0.439168211369177	0.877013320363429	121.115582536593	-0.443375439813701	0.0300260633152908	0.0759866630213982	121.115582536593	-0.0699638580912258	0.730836918117122	0.788795105165248	121.115582536593	0.12423212091981	0.519935273531808	0.810124579102379	121.115582536593	-0.19903906762887
ENSG00000142634.8	EFHD2	chr1	15736391	15756839	+	20448	6072	411	220	224.888888888889	FALSE	218.23261958238	-0.0375308648403991	0.82100655143656	0.888441309058416	218.23261958238	-0.0134008826543946	0.935668635938109	0.970985017401196	218.23261958238	-0.158139963271044	0.343108398056279	0.567092224669687	218.23261958238	-0.126858643569285	0.450465778012497	0.551764549983467	218.23261958238	-0.0830518967352221	0.616625463651802	0.877989390822396	218.23261958238	-0.213369022305787	0.197239271347834	0.683335449752104	218.23261958238	-0.154064544865011	0.356863770202859	0.501646836515177	218.23261958238	-0.349443903877872	0.0416365655584659	0.0733256254684857	218.23261958238	-0.045521031894823	0.786947340995817	0.928735849758053	218.23261958238	-0.199968139651392
ENSG00000132906.13	CASP9	chr1	15817327	15853029	-	35702	471	37	17	17.4444444444444	FALSE	16.0186341236708	-0.989272070049199	0.111424572515536	0.253269728664304	16.0186341236708	-0.345627542670314	0.565486196282343	0.761498901945463	16.0186341236708	0.098306195423773	0.867715777715515	0.937834843698373	16.0186341236708	-0.980768416140092	0.120196967923951	0.192938928378249	16.0186341236708	-0.62000541667173	0.306792512724961	0.731849497159862	16.0186341236708	0.152940733887228	0.793533945878092	0.976230426249868	16.0186341236708	0.458296493757271	0.433159607582861	0.577508687865517	16.0186341236708	-0.432442371318138	0.482314871869516	0.571521899188617	16.0186341236708	0.369266653377469	0.565910420348612	NA	16.0186341236708	0.498568276557541
ENSG00000116138.8	DNAJC16	chr1	15853308	15918874	+	65566	3217	196	124	119.148148148148	FALSE	117.121970232018	0.273861332181441	0.124186019440081	0.269821212686631	117.121970232018	0.398444079338734	0.0247220509319547	0.136996728540614	117.121970232018	0.238445152255164	0.18199212793714	0.385195325213409	117.121970232018	0.306975703966614	0.0882968744714078	0.150723884175935	117.121970232018	-0.111222891846124	0.540247201483466	0.847811973728747	117.121970232018	-0.739049135683336	7.97610847178127e-05	0.00348883891884971	117.121970232018	-0.669003887091526	0.000479325170746388	0.00253696726188105	117.121970232018	-0.403280739579519	0.035900420577363	0.0645967684516887	117.121970232018	-0.385084224027565	0.0354676082151713	0.46324031649653	117.121970232018	-1.13749321502207
ENSG00000197312.7	DDI2	chr1	15943995	15995539	+	51544	3668	241	122	135.851851851852	FALSE	133.734052243391	0.458917595977326	0.0219474306196681	0.0983468588921892	133.734052243391	0.347067386596146	0.0847058397453085	0.278167004986785	133.734052243391	-0.296319513592477	0.151231739321621	0.343933464696335	133.734052243391	0.203564676458936	0.31786343007019	0.420677188897992	133.734052243391	-0.282270273243867	0.169917673328798	0.638413575953753	133.734052243391	-0.71900057803423	0.000551769947670022	0.016509033469002	133.734052243391	-0.887819241750531	3.54730760608258e-05	0.00028069007935366	133.734052243391	-0.187226169988906	0.371459741000234	0.46342385814377	133.734052243391	-0.741187869221193	0.000311906131094779	0.0842160302226944	133.734052243391	-1.06606796463038
ENSG00000116786.7	PLEKHM2	chr1	16010827	16061264	+	50437	6081	334	225	225.222222222222	FALSE	222.020220413743	0.0433322563952211	0.762998395402457	0.850318361374871	222.020220413743	0.385061409573796	0.00643623412364528	0.0588031784385055	222.020220413743	0.444503458140132	0.00158309220632408	0.0126662075597907	222.020220413743	0.711762037730498	3.93401181673846e-07	3.53855739298907e-06	222.020220413743	0.204422589463477	0.149876631543243	0.620093469258692	222.020220413743	0.0275239331932553	0.846113574580507	0.980494980118374	222.020220413743	0.120621199136683	0.40144631387194	0.546487027904345	222.020220413743	0.49612951656951	0.000532922641490786	0.00165723363469004	222.020220413743	0.161090333068256	0.266918756152444	0.641794532057282	222.020220413743	-0.357537476380541
ENSG00000162458.8	FBLIM1	chr1	16083102	16113089	+	29987	3107	171	115	115.074074074074	FALSE	116.258397378859	0.263993928821133	0.221070405100847	0.386167379029799	116.258397378859	0.470628264400874	0.0279506328018304	0.145793343131582	116.258397378859	0.528549200855897	0.0132267534311008	0.0630741197099037	116.258397378859	0.906484396794193	1.88466277648567e-05	0.000110778575340908	116.258397378859	0.0992339036198409	0.647502391740897	0.890780195001213	116.258397378859	0.109612365309352	0.609853028559032	0.934064794976468	116.258397378859	0.212907947392094	0.327066950929684	0.469990595511649	116.258397378859	0.927324185377531	1.36795353563146e-05	6.43079957257845e-05	116.258397378859	-0.164760025201292	0.451575841138362	0.76963611403672	116.258397378859	-0.361015899091522
ENSG00000065526.6	SPEN	chr1	16174359	16266955	+	92596	5843	438	234	216.407407407407	TRUE	211.241053595994	0.197125110096857	0.543804670847914	0.686286591783314	211.241053595994	0.0384993562184327	0.905808628970021	0.955835532186465	211.241053595994	-0.651512005937912	0.047132911006139	0.158155877780335	211.241053595994	-0.0964274675851444	0.767784403597147	0.825246127703208	211.241053595994	0.0131456035164655	0.967752790921418	0.991244354556801	211.241053595994	-0.355615327963939	0.274943765980215	0.773643443900035	211.241053595994	-0.769787284665264	0.0193723141540588	0.0533838282908618	211.241053595994	0.652187378267366	0.0445423608886509	0.0776966647322884	211.241053595994	-0.183979506580391	0.572306027142711	0.837097309963501	211.241053595994	-0.394114684182372
ENSG00000142627.9	EPHA2	chr1	16450832	16482582	-	31750	5363	915	112	198.62962962963	FALSE	165.340418158398	-3.0238355102591	0.00276047256822446	0.0346029452176254	165.340418158398	-1.694049716435	0.0923250450165737	0.29226387940483	165.340418158398	-1.33643796398226	0.183932411162088	0.387896619428222	165.340418158398	-4.88291390190831	2.18446236998503e-06	1.65554197380484e-05	165.340418158398	-1.22299873042446	0.22389493878024	0.677243271636226	165.340418158398	-0.678869444307283	0.49928662709795	0.903087362711512	165.340418158398	-1.54880913452383	0.123745545321058	0.230754244542643	165.340418158398	-2.16552065435926	0.0317841367940508	0.0580016744503041	165.340418158398	1.80083677983464	0.0750038461278064	0.50032292125683	165.340418158398	1.01518027212771
ENSG00000037637.6	FBXO42	chr1	16573334	16678949	-	105615	1222	69	44	45.2592592592593	FALSE	44.5954792036958	0.362778960030707	0.133486351203919	0.281365765916933	44.5954792036958	0.190134256286375	0.440993242373076	0.671266343318989	44.5954792036958	0.104695930698997	0.673094125744969	0.824727808907584	44.5954792036958	0.236539997126779	0.344548490941496	0.449096104438492	44.5954792036958	0.086706261215963	0.72524660176166	0.920818452696484	44.5954792036958	0.358466264476817	0.130373766339731	0.577650215683076	44.5954792036958	0.390618022566227	0.107938770094842	0.207799012937277	44.5954792036958	0.878530522317786	0.000238315423132185	0.000816201908239283	44.5954792036958	-0.276072698814744	0.2668348484288	NA	44.5954792036958	0.168332008190441
ENSG00000055070.12	SZRD1	chr1	16679070	16724640	+	45570	7018	442	254	259.925925925926	FALSE	251.142249271751	0.117779322853563	0.324455530861392	0.490497071830283	251.142249271751	0.0617727532006067	0.607531124726074	0.791500169268163	251.142249271751	-0.243828118057331	0.0466058137252557	0.156810765854857	251.142249271751	-0.279356970930162	0.0253141983081151	0.0530735880343133	251.142249271751	-0.0155725450171561	0.896857246573237	0.977090335803907	251.142249271751	-0.0581330786259189	0.625369316380742	0.934540299019156	251.142249271751	-0.0498367247674027	0.681513053175861	0.785364753935056	251.142249271751	-0.215047539719207	0.0875903165633191	0.138184869612984	251.142249271751	-0.133351867870719	0.275041986423062	0.648797307829401	251.142249271751	-0.119905831826526
ENSG00000157191.15	NECAP2	chr1	16767167	16786573	+	19406	1593	123	62	59	FALSE	54.4693851503286	-0.856388597435975	0.0516140258342785	0.157598379812567	54.4693851503286	-0.6456393539789	0.140194529123961	0.366397043028245	54.4693851503286	-0.143718257927536	0.739247822706442	0.864900979073127	54.4693851503286	-1.37540474504774	0.00247036977438646	0.00739138067565561	54.4693851503286	-0.525334356316508	0.22728790023017	0.678173744148437	54.4693851503286	0.216297004833084	0.612470946951799	0.934212023933782	54.4693851503286	0.498794078669559	0.243051496608384	0.381350099467306	54.4693851503286	-0.509632230604128	0.247864277095269	0.331241699089629	54.4693851503286	0.331054241119467	0.459705530490876	NA	54.4693851503286	0.861936358811984
ENSG00000219481.6	NBPF1	chr1	16888814	16940057	-	51243	2474	248	84	91.6296296296296	FALSE	83.9262092960726	-0.972452485182367	0.000474563737098363	0.0130808556247253	83.9262092960726	-0.620602249226848	0.0239038568517713	0.13450405432507	83.9262092960726	-1.10448001054809	8.13608881907106e-05	0.00113997849355992	83.9262092960726	-1.37077888067811	1.9543730861468e-06	1.51038859940152e-05	83.9262092960726	-0.390658996169742	0.150589599947073	0.620824211683751	83.9262092960726	-0.439172782068073	0.104539147920222	0.527656649015403	83.9262092960726	-0.527757506465378	0.0542574496813565	0.121690901588821	83.9262092960726	-0.956339291755401	0.000753577143787991	0.00224713479946523	83.9262092960726	0.581793489012625	0.0399614318510894	0.46324031649653	83.9262092960726	0.181429467158775
ENSG00000058453.12	CROCC	chr1	17066768	17299474	+	232706	847	54	30	31.3703703703704	FALSE	30.0620102684632	-0.104331258984197	0.742776984798933	0.836667879478745	30.0620102684632	0.296627352709925	0.339189415839045	0.586860841383341	30.0620102684632	0.00279394436799514	0.992942780350215	0.996763819210068	30.0620102684632	-0.54036054959252	0.109330742963056	0.179311574440931	30.0620102684632	-0.193514712906708	0.543809611575222	0.849529989656216	30.0620102684632	-0.276066686911221	0.382618419497062	0.846379739485325	30.0620102684632	-0.792852496388888	0.0201960677744252	0.0552825654422561	30.0620102684632	-0.190504440188796	0.564764899212157	0.64612043766744	30.0620102684632	-0.089183453922511	0.786669714550461	NA	30.0620102684632	-0.572694039621147
ENSG00000117118.5	SDHB	chr1	17345217	17380665	-	35448	4666	405	173	172.814814814815	TRUE	157.96317611614	-0.925936379304141	0.0135352872340713	0.0759827818214935	157.96317611614	-0.777013021798468	0.0379647036109818	0.174011622880761	157.96317611614	-0.237233415542283	0.523624461021273	0.722972597439563	157.96317611614	-1.38250748309348	0.000273365199924841	0.00113249419603479	157.96317611614	-0.62159281485501	0.0958547172020895	0.551388583531645	157.96317611614	0.152439141194292	0.68042027138829	0.949088944942952	157.96317611614	-0.0568872482539172	0.878317940894985	0.924562142278535	157.96317611614	-0.890628319248632	0.0182960365266215	0.0360688507778305	157.96317611614	0.304343564449131	0.420980481495746	0.751655156330723	157.96317611614	0.92945216299276
ENSG00000142619.4	PADI3	chr1	17575593	17610728	+	35135	3881	295	144	143.740740740741	FALSE	152.352723603515	0.184877308122457	0.503123416854084	0.653665420825268	152.352723603515	-0.30425489431361	0.279044876196561	0.530958819987541	152.352723603515	0.471664675373123	0.0854497188476166	0.23565875003609	152.352723603515	1.17253849149285	1.57320964469385e-05	9.42722358019954e-05	152.352723603515	-0.336804096318626	0.229762978467917	0.680623181960954	152.352723603515	-0.128108098202085	0.643329340711333	0.939393384950652	152.352723603515	1.02857371559357	0.000151684842631325	0.000963204339686168	152.352723603515	1.8328834158377	1.0712211838977e-11	1.55924205095379e-10	152.352723603515	-0.521681404441082	0.0645510300430957	0.495139396925625	152.352723603515	0.176146796111525
ENSG00000179051.9	RCC2	chr1	17733256	17766220	-	32964	30982	3057	1029	1147.48148148148	FALSE	1010.89912662208	-1.90264036886605	0.0208518053473596	0.0956762548872191	1010.89912662208	-0.894422084707731	0.277100321815616	0.529792206142703	1010.89912662208	-0.470073759560138	0.567794297560084	0.752836353604439	1010.89912662208	-3.70225755440081	7.47192209380281e-06	4.97569958904937e-05	1010.89912662208	-0.685096959108028	0.405077141394609	0.790262401844444	1010.89912662208	0.0754905074127592	0.926884852346567	0.992832397446575	1010.89912662208	-0.0739738329627674	0.928356916390512	0.955524551903612	1010.89912662208	-1.09339305791321	0.184102211816296	0.257325021771456	1010.89912662208	1.21754340975802	0.139341098203769	0.548238634884583	1010.89912662208	0.96991259212049
ENSG00000074964.12	ARHGEF10L	chr1	17866330	18024369	+	158039	3442	215	123	127.481481481481	FALSE	123.141354816375	0.065571186931188	0.773072312230515	0.856903024760785	123.141354816375	0.294569319214595	0.192008664863799	0.434262116832378	123.141354816375	0.547627475697778	0.0143442290726398	0.0667409405609812	123.141354816375	0.618445928477746	0.00591140092820244	0.015306052223053	123.141354816375	0.121686777688413	0.591061696771122	0.86685696865937	123.141354816375	0.15496088801113	0.490196466640721	0.8976172760633	123.141354816375	-0.0488706045245196	0.831290221679112	0.891392215058351	123.141354816375	0.0258644479314181	0.911320645704088	0.932531766302354	123.141354816375	0.0561155907572245	0.806932734432186	0.930690028342778	123.141354816375	-0.139608431203465
ENSG00000159423.12	ALDH4A1	chr1	19197926	19229275	-	31349	8074	456	318	299.037037037037	FALSE	297.380945889875	0.393759939867722	0.0544147162753782	0.162527421194084	297.380945889875	0.371968519775833	0.069534969430595	0.249140470512864	297.380945889875	0.341750921705982	0.095449307002507	0.254167700383375	297.380945889875	0.73607063878965	0.000315743350629146	0.00127675291054498	297.380945889875	0.150602538192355	0.463539535494639	0.812236651358822	297.380945889875	-0.14811561754916	0.471784556648746	0.890048417188885	297.380945889875	-0.54832997439279	0.00893637517584445	0.0288948386079743	297.380945889875	0.014513757674131	0.94444943205286	0.958013037786874	297.380945889875	-0.243157401675366	0.236971953690466	0.620777132921088	297.380945889875	-0.520084137324994
ENSG00000169991.6	IFFO2	chr1	19230775	19283180	-	52405	943	63	34	34.9259259259259	FALSE	34.6657112862506	0.378113501658589	0.228132227698752	0.392535025175748	34.6657112862506	0.510404818099786	0.101643170089195	0.308560202955574	34.6657112862506	0.469105443686217	0.132827090255938	0.315743734271839	34.6657112862506	1.07775438731055	0.000397593507322536	0.00155518077739369	34.6657112862506	0.300842201778477	0.3384464254558	0.755659570888768	34.6657112862506	0.00538826510386013	0.986430014831815	0.998588534801244	34.6657112862506	0.610217070443715	0.0493480997242222	0.113033645753222	34.6657112862506	0.533649575045226	0.0948679604658256	0.147799171096369	34.6657112862506	-0.077271299880112	0.806832163843751	NA	34.6657112862506	-0.505016552995926
ENSG00000127481.10	UBR4	chr1	19401000	19536770	-	135770	2860	149	108	105.925925925926	FALSE	106.855905295612	0.619120857906791	0.00589417554434735	0.0510273515029561	106.855905295612	0.367595717106031	0.106448731415712	0.315863883818591	106.855905295612	0.127083504149661	0.580779529478505	0.762499093679954	106.855905295612	0.838458681406335	0.000193545340654417	0.000837239056435295	106.855905295612	0.313591854263148	0.167684229696964	0.638413575953753	106.855905295612	-0.0841750970400708	0.713768655336554	0.957470154173844	106.855905295612	0.181807585815487	0.429712442553896	0.574527869276482	106.855905295612	1.04225722279154	3.52289776283434e-06	1.88084324797668e-05	106.855905295612	-0.305529003643644	0.175896642433545	0.563230687244399	106.855905295612	-0.451770814146101
ENSG00000127463.9	EMC1	chr1	19542158	19578046	-	35888	3872	281	133	143.407407407407	FALSE	134.603963444148	-0.299496830974955	0.130329752981039	0.277228210673318	134.603963444148	-0.105993079274437	0.589893206050726	0.779894513101041	134.603963444148	-0.197049080329082	0.317736573916214	0.543479922992497	134.603963444148	-0.470882850270877	0.0199540917360853	0.0432763880983484	134.603963444148	0.108799219844919	0.575428897820875	0.859343539976838	134.603963444148	-0.0652798882038929	0.736603195101699	0.964664181720614	134.603963444148	-0.354472034256774	0.0753878132488106	0.15706402001088	134.603963444148	-0.644826679788348	0.00183475544919679	0.00486015607307985	134.603963444148	0.408296050819874	0.0410075760817642	0.46324031649653	134.603963444148	0.0407131910705444
ENSG00000053372.4	MRTO4	chr1	19578033	19586622	+	8589	12685	880	432	469.814814814815	FALSE	450.037836980928	0.411315517830739	0.0316196014049421	0.119056557272687	450.037836980928	-0.202325402390503	0.294102700909927	0.545124322164087	450.037836980928	-0.744597734072124	0.000129525774337513	0.00165351644069089	450.037836980928	-0.856311804433502	1.24138719793939e-05	7.67362516832408e-05	450.037836980928	0.139101044219925	0.468372006530569	0.814508299227466	450.037836980928	-0.212446026546194	0.26887815812652	0.768697664453593	450.037836980928	-0.686571656149685	0.000417338805235696	0.00225675881963956	450.037836980928	-0.675668342981543	0.000565450731378052	0.00174453596573028	450.037836980928	-0.272214473610814	0.155995974778378	0.556638357983752	450.037836980928	-0.0101206241556908
ENSG00000053371.8	AKR7A2	chr1	19630459	19638640	-	8181	13668	686	490	506.222222222222	FALSE	511.787781640914	0.458139180908162	0.0804097365490415	0.205433110516526	511.787781640914	0.220950649840218	0.400044988652796	0.640138200445147	511.787781640914	0.255436104698781	0.330401917300511	0.555960422061805	511.787781640914	0.542688808338764	0.0385486603602357	0.0752887140353923	511.787781640914	0.0717157861478527	0.78484631120965	0.940695265589738	511.787781640914	0.0813808535893112	0.75634225054021	0.970342365546299	511.787781640914	0.457650957681355	0.0808953706999442	0.165828888520121	511.787781640914	0.640589540027082	0.0146668282625398	0.0297864857738169	511.787781640914	-0.386423394760309	0.14123594119728	0.549390876144693	511.787781640914	-0.139569796250907
ENSG00000077549.13	CAPZB	chr1	19665267	19812066	-	146799	43694	3502	1476	1618.2962962963	FALSE	1493.85750193903	-1.25338514528474	0.00795444792932783	0.0586342838383387	1493.85750193903	-0.487656348593232	0.301419615686572	0.552976970059865	1493.85750193903	0.102462873718616	0.82803706972028	0.913762977865628	1493.85750193903	-0.763234472341842	0.105955646033945	0.17517647771959	1493.85750193903	-0.4809903545193	0.308041204598421	0.73280802557094	1493.85750193903	0.0336905697598268	0.943055014794815	0.993959434783605	1493.85750193903	0.0920244583733798	0.845328090816333	0.90210648029515	1493.85750193903	-0.700906688431718	0.137709300359346	0.20194707984964	1493.85750193903	0.772394790765444	0.102118074936252	0.52245844998488	1493.85750193903	0.521346918353059
ENSG00000173436.9	MINOS1	chr1	19923477	19956314	+	32837	3240	199	121	120	FALSE	115.45964016969	0.0460988431782588	0.780017114631847	0.861498010354092	115.45964016969	0.301074074768526	0.0642439848807617	0.237388686842849	115.45964016969	0.115277923094726	0.483336709342062	0.690011998740979	115.45964016969	0.0948500683779351	0.570940754055449	0.66170766344261	115.45964016969	-0.021672871766004	0.895643614679458	0.97665000197357	115.45964016969	0.0636020338344137	0.694849406992634	0.953088406470476	115.45964016969	-0.299777256229197	0.0795652201632089	0.163709050178216	115.45964016969	-0.481672982442771	0.00731209383763728	0.0163785579929609	115.45964016969	-0.0677717149442628	0.689178206531413	0.88797553352451	115.45964016969	-0.237472040934112
ENSG00000158747.9	NBL1	chr1	19967048	19984945	+	17897	5118	283	189	189.555555555556	FALSE	188.665064666648	0.454528609977927	0.0059672428795023	0.0511058860803661	188.665064666648	0.526955085377614	0.00141684017318142	0.021998039229377	188.665064666648	0.222314343424554	0.183896188506006	0.387896619428222	188.665064666648	0.712705043895254	1.58690294690136e-05	9.49765359847216e-05	188.665064666648	0.409406325578702	0.0132600438638234	0.27335358367121	188.665064666648	0.126151664276906	0.447113111257719	0.878753291825064	188.665064666648	0.236966705384913	0.157695579829909	0.276303947009826	188.665064666648	0.538792469327875	0.00132985011027752	0.00369652066997322	188.665064666648	-0.0451222843992257	0.784826052433717	0.92842113394148	188.665064666648	-0.400803421100708
ENSG00000162542.9	TMCO4	chr1	20008706	20126438	-	117732	1228	76	42	45.4814814814815	FALSE	43.9472077724331	0.627509377766949	0.00477082464450623	0.0458307647287738	43.9472077724331	0.153452289004303	0.51007613039768	0.722586180356269	43.9472077724331	-0.0175788585854581	0.940736713818478	0.974904180754519	43.9472077724331	-0.250385749140516	0.315716380371478	0.418092523384206	43.9472077724331	0.492898356560699	0.0275963333883637	0.373308641770063	43.9472077724331	0.188253079075889	0.4046389777157	0.858178399423057	43.9472077724331	-0.348142983166995	0.160336834121193	0.279850617707579	43.9472077724331	0.0736028670769654	0.762670496673315	0.814264858113488	43.9472077724331	-0.134611021206251	0.54179562225765	NA	43.9472077724331	0.0348007900715863
ENSG00000162545.5	CAMK2N1	chr1	20808884	20812713	-	3829	5614	366	194	207.925925925926	FALSE	206.586304321368	-0.226113996980685	0.227728500126192	0.392075221895583	206.586304321368	-0.331276691739148	0.0789959960441975	0.266813171662173	206.586304321368	-0.0899817821893708	0.629780882429477	0.795721680922991	206.586304321368	0.492618985364595	0.0075823270810873	0.01885081144193	206.586304321368	-0.437637345773489	0.0203883646102255	0.329804530133792	206.586304321368	-0.189417517079124	0.307554376093218	0.799921065060526	206.586304321368	-0.392166583931162	0.0383872170396969	0.0925525039818323	206.586304321368	0.602618752858173	0.00111661605017422	0.00317838575728972	206.586304321368	-0.211523348792804	0.271754291523496	0.647638732135434	206.586304321368	0.141859174660024
ENSG00000090432.5	MUL1	chr1	20825943	20834654	-	8711	3690	228	130	136.666666666667	FALSE	134.570534420685	0.45597975208227	0.0240262372843064	0.102441408549663	134.570534420685	-0.076808158684717	0.710026386471963	0.854630167932519	134.570534420685	-0.169270267125795	0.413974839164465	0.63203777269316	134.570534420685	-0.0951997337712424	0.648125286297135	0.727958236707822	134.570534420685	-0.0899124140853383	0.66226390404898	0.896720311312077	134.570534420685	-0.206442482972494	0.314251767958543	0.804966553061464	134.570534420685	-0.183188217313627	0.378420653567899	0.523495066911958	134.570534420685	0.205852202394099	0.32073844791606	0.410215682772135	134.570534420685	-0.545892166167608	0.00798473513928438	0.317358989529346	134.570534420685	-0.129634324287777
ENSG00000158828.5	PINK1	chr1	20959948	20978004	+	18056	5936	347	205	219.851851851852	FALSE	220.253986413255	0.0342456800005483	0.84309831525775	0.902033546383913	220.253986413255	0.184768541503174	0.283506446943088	0.53456784536293	220.253986413255	0.534336890607106	0.00167067699799016	0.0132196728114612	220.253986413255	0.918771684633959	5.5412764677309e-08	6.04419991423256e-07	220.253986413255	-0.223175484257921	0.201385305640719	0.663514167682272	220.253986413255	-0.0506314736564598	0.768355953527602	0.972383429907978	220.253986413255	0.16639905311454	0.335201640938185	0.478138145996415	220.253986413255	0.477882166115218	0.00567564448275452	0.0130977580363941	220.253986413255	-0.257421164258469	0.146478368917769	0.553848781733493	220.253986413255	-0.235400015159633
ENSG00000244038.5	DDOST	chr1	20978270	20988000	-	9730	9819	692	394	363.666666666667	FALSE	345.830362629838	-0.668070345885005	0.0640547168869066	0.178108904619062	345.830362629838	0.431495444641314	0.228516403212828	0.477363841572107	345.830362629838	0.518068413651334	0.148045265060058	0.338935519784266	345.830362629838	0.0122459297445144	0.972827320735971	0.98006311522257	345.830362629838	-0.0664473449727176	0.85319379112356	0.96399934665179	345.830362629838	0.222516371279772	0.534469559373662	0.915734574799466	345.830362629838	0.327052621245135	0.361704117315437	0.506632701382821	345.830362629838	-0.201818986124921	0.575753203848304	0.655991717249879	345.830362629838	0.601623000912287	0.0961645473777668	0.522420750539714	345.830362629838	-0.208979073361541
ENSG00000189410.7	SH2D5	chr1	21046225	21059330	-	13105	1186	70	42	43.9259259259259	FALSE	43.2754618782679	0.55850277458363	0.0568939221331008	0.166112138393634	43.2754618782679	0.53447428864325	0.0695725296551926	0.249171441412633	43.2754618782679	0.317980698335474	0.286015334639081	0.511326584768664	43.2754618782679	0.752866072674508	0.0104291645833916	0.0248979075047814	43.2754618782679	0.672723687533465	0.0206701301138286	0.332182664212194	43.2754618782679	0.203787946600312	0.490002811699382	0.8976172760633	43.2754618782679	-0.201151765630318	0.518982520995031	0.653620634816454	43.2754618782679	0.431400726259045	0.155276462057059	0.222965717971284	43.2754618782679	0.114220912949835	0.692540078902402	NA	43.2754618782679	-0.330686342042938
ENSG00000127483.13	HP1BP3	chr1	21069154	21113816	-	44662	11360	928	378	420.740740740741	FALSE	392.13115619747	-0.752048707892065	0.0193144144231736	0.0917052130387901	392.13115619747	-0.459454292348502	0.152187556905675	0.383114279245166	392.13115619747	-0.204292248447658	0.523622722405241	0.722972597439563	392.13115619747	-0.617353731014029	0.0550060188340909	0.101626686169246	392.13115619747	-0.225509202324688	0.481335033763964	0.821241757668135	392.13115619747	-0.0840757543065348	0.792567470353106	0.976230426249868	392.13115619747	-0.110768404034735	0.729442068280806	0.819398031857086	392.13115619747	-0.300588562939864	0.349681378358364	0.440720262880507	392.13115619747	0.526539505567377	0.102398267346513	0.52245844998488	392.13115619747	0.375378538041967
ENSG00000075151.15	EIF4G3	chr1	21132963	21503377	-	370414	5226	361	184	193.555555555556	FALSE	187.988833695871	-0.0611565880625866	0.774000816333183	0.857491004672542	187.988833695871	-0.261429485491536	0.22344138753204	0.470526499600094	187.988833695871	0.144692227688399	0.494614107991685	0.699214574461042	187.988833695871	0.076913860130356	0.718805320210008	0.786820207219641	187.988833695871	-0.0331402841163552	0.876089511258067	0.969713999750078	187.988833695871	-0.077241733403326	0.715092578692705	0.957470154173844	187.988833695871	0.261674032277281	0.21608441705473	0.349802634183846	187.988833695871	0.495378787118831	0.0195215529378535	0.0381513389369396	187.988833695871	0.0280163039462314	0.896469965602527	0.965443561382907	187.988833695871	0.18418775208821
ENSG00000117298.10	ECE1	chr1	21543740	21671997	-	128257	26418	1496	973	978.444444444444	FALSE	970.796291315104	0.375890280330345	0.0128940997328438	0.0740668042218711	970.796291315104	0.600093909446059	6.99546113457233e-05	0.00214519176500391	970.796291315104	0.115543240836667	0.4460568007288	0.659404949713513	970.796291315104	0.669134828697579	9.45738440529537e-06	6.0907534693894e-05	970.796291315104	0.172793670335037	0.253821882402416	0.693958589453975	970.796291315104	-0.0483472438310561	0.749557262879141	0.968788644713665	970.796291315104	-0.249933504619699	0.101297857782632	0.197708638847778	970.796291315104	0.432198970371257	0.00440938462778786	0.010501842824115	970.796291315104	-0.203096609995308	0.180118984513536	0.564891888996106	970.796291315104	-0.648441153277116
ENSG00000090686.11	USP48	chr1	22004791	22110099	-	105308	20070	1197	764	743.333333333333	FALSE	730.625859365445	0.202740969721237	0.287061327827029	0.453458514002935	730.625859365445	0.285105723382386	0.134258442367108	0.359287266421545	730.625859365445	0.0028759021532717	0.987975786061181	0.995368566408184	730.625859365445	0.28025981853981	0.141666876309769	0.220390589124622	730.625859365445	0.180670702671036	0.3427166122609	0.757387947522456	730.625859365445	0.074988762064276	0.693486328511266	0.953088406470476	730.625859365445	-0.300901264783116	0.116307698369137	0.219930532553621	730.625859365445	0.152814215170035	0.424507133567068	0.516226075352445	730.625859365445	-0.0220702670502013	0.907897672535304	0.969868845164574	730.625859365445	-0.21011696131811
ENSG00000142798.12	HSPG2	chr1	22148738	22263790	-	115052	3113	336	87	115.296296296296	FALSE	124.415749087802	0.597552290551406	0.145170263248334	0.296218839311129	124.415749087802	0.533180364356975	0.194450219953629	0.437259275923911	124.415749087802	1.01683023608721	0.0126877641864059	0.0610784715051728	124.415749087802	2.33888092135473	7.17698581304863e-09	9.60311906072051e-08	124.415749087802	0.124119856272703	0.76398750752089	0.934527717913936	124.415749087802	-0.591523437874243	0.157632269071329	0.629125183054594	124.415749087802	-0.561560981868544	0.183851726836412	0.308700376100811	124.415749087802	2.3465419357304	6.66825944325822e-09	5.99169881361377e-08	124.415749087802	-0.473432434278703	0.250922723024729	0.628639277389967	124.415749087802	-1.12470380223122
ENSG00000070831.11	CDC42	chr1	22379120	22419437	+	40317	11715	965	413	433.888888888889	FALSE	409.518499277184	-0.315312770824178	0.064810274922478	0.179605905779635	409.518499277184	-0.26180952304715	0.125175583949685	0.346383431886461	409.518499277184	0.0229986041229752	0.892276896717307	0.949190890954708	409.518499277184	-0.225725198646465	0.187463187860938	0.275566409040891	409.518499277184	-0.419765976208417	0.0140831624287112	0.280913450574547	409.518499277184	-0.529723045101337	0.00191020921515765	0.0437460019561362	409.518499277184	-0.646267738294789	0.000176603790281427	0.0010963939919705	409.518499277184	-1.44485867898187	8.3554073445909e-16	2.40797809659999e-14	409.518499277184	-0.104453205384239	0.545736151112381	0.822563086442896	409.518499277184	-0.267913522054188
ENSG00000184677.12	ZBTB40	chr1	22778344	22857650	+	79306	2772	168	104	102.666666666667	FALSE	100.124774002142	0.2863842184608	0.0821523034606624	0.20851440321665	100.124774002142	0.216925257641107	0.192225966545741	0.434525486286633	100.124774002142	0.164409757266163	0.323995911984603	0.549356631031922	100.124774002142	-0.0639937103058794	0.713077446096575	0.782451082772722	100.124774002142	0.175672165453028	0.288450246793363	0.716242143563558	100.124774002142	0.0140275664753054	0.932289215818089	0.993045315246149	100.124774002142	0.297682223560437	0.0724814119416805	0.15237385459469	100.124774002142	0.402332040581275	0.0170182620788005	0.0338975078785372	100.124774002142	-0.110712053007772	0.508885806532352	0.803051863472995	100.124774002142	-0.202897691165801
ENSG00000133216.12	EPHB2	chr1	23037332	23241818	+	204486	12007	683	423	444.703703703704	FALSE	430.022469909738	0.182717327078043	0.18686334905282	0.345685160753145	430.022469909738	0.62138743914305	5.77610487313694e-06	0.000287703443305324	430.022469909738	-0.0188937359567533	0.892192293740295	0.949190890954708	430.022469909738	-0.0622216767010245	0.65832385435076	0.737490464500845	430.022469909738	0.417580857600554	0.00237457182769713	0.107129243137519	430.022469909738	0.20125559664039	0.143169747001309	0.60180180971233	430.022469909738	0.0899202537260657	0.518263746920473	0.653097207840555	430.022469909738	0.224663847885156	0.108887064836978	0.165979097417343	430.022469909738	0.234863530522511	0.0896640367724859	0.512629410500756	430.022469909738	-0.42013184250266
ENSG00000004487.11	KDM1A	chr1	23345941	23410182	+	64241	2793	171	111	103.444444444444	FALSE	98.9947156082597	-0.227756978983503	0.294400543161396	0.461245360076681	98.9947156082597	0.0851951075835421	0.690421353968712	0.84232773710157	98.9947156082597	0.0348682371472557	0.870675811052038	0.939440717561667	98.9947156082597	0.104954248449857	0.62686848437329	0.709726150288352	98.9947156082597	0.0993290127088568	0.640516316278023	0.889067187075987	98.9947156082597	0.196052074742745	0.350194089637177	0.828571288646602	98.9947156082597	0.336159977150702	0.112169852479851	0.213842393543999	98.9947156082597	-0.0822142536658359	0.709730910973549	0.772776252193464	98.9947156082597	0.32708599169236	0.137158457136174	0.544560555662802	98.9947156082597	0.110856967159203
ENSG00000169641.9	LUZP1	chr1	23410516	23504301	-	93785	6305	349	220	233.518518518519	FALSE	230.633775192697	0.332840884114168	0.0516675838045163	0.157599847661422	230.633775192697	0.155843974499476	0.366226158626846	0.611959666141982	230.633775192697	0.258569796287088	0.131931771631461	0.314657092761776	230.633775192697	0.254742857605242	0.141073300253427	0.219784601027623	230.633775192697	0.287862708451271	0.0924058601850453	0.549275982225257	230.633775192697	0.388722663673994	0.0217850899572954	0.235831809248762	230.633775192697	0.345349505476239	0.0440176281639425	0.102902849128783	230.633775192697	0.597069458131627	0.000516562548031526	0.00161510140652673	230.633775192697	-0.0449781756628969	0.793355058521912	0.928949489130127	230.633775192697	0.232878689174517
ENSG00000125944.14	HNRNPR	chr1	23630264	23670829	-	40565	15733	1128	538	582.703703703704	FALSE	554.990395380282	-0.127448648998346	0.2488536753157	0.412943773401938	554.990395380282	-0.329651864304541	0.00312145031156593	0.0371512946612757	554.990395380282	-0.309617881984456	0.00542152318310517	0.0328532104562709	554.990395380282	-0.460032743658875	4.73674440252166e-05	0.000247073405063736	554.990395380282	-0.0560568233147702	0.610694068009142	0.875199690145491	554.990395380282	0.0980991200048537	0.368200606791152	0.839330891747167	554.990395380282	-0.0790461588033028	0.475025035590697	0.614239305474946	554.990395380282	-0.490397506797116	1.7689262953491e-05	8.08209856151813e-05	554.990395380282	0.0713918256835754	0.523371961600961	0.810124579102379	554.990395380282	0.427750984309394
ENSG00000249087.3	C1orf213	chr1	23695490	23698332	+	2842	426	80	11	15.7777777777778	FALSE	16.9663676956141	0.226764350724759	0.645462756968368	0.767165872661576	16.9663676956141	0.604416989723921	0.201885381362169	0.447417363186005	16.9663676956141	0.505854485430267	0.289197419875965	0.514537421859513	16.9663676956141	1.39338389311893	0.0018163980733038	0.00570196801371906	16.9663676956141	-0.205217326893167	0.692290748541671	0.907299694569084	16.9663676956141	-0.219947638027166	0.663916017076856	0.945599309822077	16.9663676956141	1.98572116611965	2.97265801942395e-06	3.27981999403024e-05	16.9663676956141	3.3656531703528	1.39455826332108e-16	4.40179800550832e-15	16.9663676956141	-0.431981677617926	0.416603114631062	NA	16.9663676956141	-0.824364627751086
ENSG00000007968.6	E2F2	chr1	23832922	23857712	-	24790	1777	170	75	65.8148148148148	FALSE	60.0081165335436	0.304627426787694	0.103342991462057	0.241198959216832	60.0081165335436	-0.204152234951023	0.293633155940042	0.544894337456058	60.0081165335436	-2.02338898297112	1.00641563570264e-16	1.84516670911695e-14	60.0081165335436	-3.51359555266264	9.16457623711554e-23	7.52106223192615e-21	60.0081165335436	0.0431983570748791	0.81968805352218	0.951946207392667	60.0081165335436	-0.21597128729413	0.256559838643244	0.757466546253212	60.0081165335436	-1.64068705398696	1.27135549283878e-12	6.15464622572571e-11	60.0081165335436	-2.74484981363584	1.47220852916815e-19	6.78396839349838e-18	60.0081165335436	-0.261429069712815	0.17115598576053	NA	60.0081165335436	-0.0118190523431072
ENSG00000117318.8	ID3	chr1	23884409	23886285	-	1876	29039	3292	998	1075.51851851852	FALSE	966.013963362899	-1.34915643827808	0.00271744621546595	0.034284383658375	966.013963362899	-0.879030071365686	0.0506448721937351	0.204982087220956	966.013963362899	-0.534488224484846	0.23449099280683	0.452848248546941	966.013963362899	-1.45304827402734	0.00125133944884111	0.00412979522906926	966.013963362899	-0.829301727275375	0.0651559550166875	0.504624318891394	966.013963362899	-0.940865203678011	0.0363946205025364	0.318388268903915	966.013963362899	-1.27608292743147	0.00457418075172363	0.0166662644979292	966.013963362899	-2.58718501708186	1.06353348675579e-08	9.2290715562685e-08	966.013963362899	0.51985471100271	0.248441450162561	0.625844874455305	966.013963362899	-0.061835132312325
ENSG00000142676.8	RPL11	chr1	24018269	24022915	+	4646	139088	8161	5065	5151.40740740741	FALSE	5022.5783329482	0.00875316414590893	0.947942020376471	0.967821847107115	5022.5783329482	-0.0218789198996176	0.870390993155787	0.94081274310379	5022.5783329482	0.075882762789619	0.571332692978924	0.754856457436276	5022.5783329482	0.116506248126546	0.384998960970625	0.489241424244942	5022.5783329482	0.0706536825081185	0.598085639548722	0.869529940271864	5022.5783329482	0.100494648078773	0.453115803175889	0.880768321959687	5022.5783329482	0.330996348420434	0.0134933255759227	0.0403302068982746	5022.5783329482	0.109951409262468	0.412618617238928	0.504832404479319	5022.5783329482	0.0619005183622095	0.644535589828782	0.873655956091877	5022.5783329482	0.122373567978391
ENSG00000011007.8	TCEB3	chr1	24069645	24088549	+	18904	5941	622	168	220.037037037037	FALSE	198.645729498063	-0.983968295277925	0.00769068325032103	0.0579288615105038	198.645729498063	-0.554086926884033	0.131991817648943	0.356950253808338	198.645729498063	-0.306661698946563	0.403511243134683	0.623754581362767	198.645729498063	-1.34942702016686	0.000286954310548018	0.00118084302482917	198.645729498063	-0.526133624468123	0.15226769286367	0.623025028208093	198.645729498063	-0.526571532803236	0.15132910942559	0.6170234617239	198.645729498063	-1.18169563603722	0.00142071992818772	0.00639955233726797	198.645729498063	-1.76498056286686	2.75591126689214e-06	1.51548738907527e-05	198.645729498063	0.457834670809803	0.217279201057449	0.602366215905425	198.645729498063	0.0275153940807975
ENSG00000057757.5	PITHD1	chr1	24104895	24114722	+	9827	3069	228	105	113.666666666667	FALSE	107.350062141929	-0.0759064123656552	0.649183056435089	0.770206580930905	107.350062141929	-0.49383122520486	0.00420757423091872	0.0445084226618388	107.350062141929	-0.724388557014362	3.68846792299123e-05	0.000605400535093627	107.350062141929	-0.675801724058599	0.000150432601992028	0.000670951206710821	107.350062141929	0.0200732658518724	0.903407115301943	0.978994026526635	107.350062141929	-0.320348402806782	0.054876053882454	0.395236249111862	107.350062141929	-0.895940134343457	6.08988410592718e-07	8.19945802199601e-06	107.350062141929	-0.968485668470151	2.24323750384216e-07	1.54269573588251e-06	107.350062141929	0.0959796782175277	0.572389533158643	0.837097309963501	107.350062141929	0.173482822398077
ENSG00000011009.6	LYPLA2	chr1	24117460	24122029	+	4569	11739	827	430	434.777777777778	FALSE	430.167237995385	0.830438254326401	1.15368100535381e-05	0.000979443321453401	430.167237995385	0.801702975458117	2.32586112801607e-05	0.000923591951157349	430.167237995385	0.264511116458756	0.165436700171441	0.363546403576835	430.167237995385	0.364600440030348	0.0563089763095188	0.103656152287785	430.167237995385	0.17582956237578	0.356728563629222	0.764458831586096	430.167237995385	-0.504024838566116	0.00880187530394898	0.133062735954611	430.167237995385	-0.674186585124224	0.000536297965894909	0.0027990790866847	430.167237995385	-0.183700729971478	0.343502249775044	0.434521269276505	430.167237995385	-0.654608691950621	0.000568249118224172	0.105751354560537	430.167237995385	-1.30572781402423
ENSG00000117308.10	GALE	chr1	24122089	24127271	-	5182	1627	106	58	60.2592592592593	FALSE	58.1689119188983	0.436309394337895	0.0201289443084458	0.0937573584356095	58.1689119188983	0.127832895673497	0.510181129089038	0.722586180356269	58.1689119188983	-0.0563807682632265	0.775095525179879	0.883816083164618	58.1689119188983	-0.142972194402302	0.48440947832451	0.583205450697231	58.1689119188983	-0.0332905106401805	0.86458693968558	0.965894423357962	58.1689119188983	-0.146966998913383	0.448097009069719	0.878753291825064	58.1689119188983	-0.21020567286558	0.299179241735286	0.441553543577356	58.1689119188983	-0.0914278355334094	0.658318495350385	0.728019824747724	58.1689119188983	-0.469599904978075	0.0163309365406075	NA	58.1689119188983	-0.274799894586881
ENSG00000117305.10	HMGCL	chr1	24128375	24165110	-	36735	1254	99	43	46.4444444444444	FALSE	49.012501475854	0.288983192464677	0.304390704672739	0.471764660443987	49.012501475854	0.256062594883558	0.3662383658227	0.611959666141982	49.012501475854	0.778923593382313	0.00407180618871814	0.0264605987392038	49.012501475854	1.4829671703421	1.77248915867133e-08	2.16339080457094e-07	49.012501475854	-0.171843889548256	0.557065153572494	0.854885115336801	49.012501475854	0.210176295767524	0.448646148917562	0.878832431284982	49.012501475854	0.821723354461364	0.00248068090739267	0.0100925530590192	49.012501475854	2.01837293337521	6.31909728186233e-15	1.57830902254515e-13	49.012501475854	-0.460827082012932	0.120055658518838	NA	49.012501475854	-0.0458862991160337
ENSG00000189266.7	PNRC2	chr1	24285599	24289952	+	4353	3166	214	117	117.259259259259	FALSE	112.817132957713	-0.0768166143370217	0.602545471002218	0.73388965911366	112.817132957713	-0.102234768143664	0.491340911433828	0.70907463303053	112.817132957713	0.140856785169346	0.330798492654114	0.556099710472616	112.817132957713	0.101571899998408	0.493318307350411	0.591474030115276	112.817132957713	-0.283776954828447	0.0580232560689335	0.487809530811128	112.817132957713	-0.142547998354094	0.325821469079221	0.814033793603139	112.817132957713	-0.0179550139135238	0.90335875428141	0.940390809149018	112.817132957713	-0.45570787026481	0.00460381974199551	0.0109106476118744	112.817132957713	-0.206960340491425	0.184125330164267	0.571318087511913	112.817132957713	-0.0403132302104309
ENSG00000188529.10	SRSF10	chr1	24291294	24307417	-	16123	11582	862	405	428.962962962963	FALSE	403.530465325309	-0.21505273808584	0.05961648380615	0.170556188896944	403.530465325309	-0.288263832073098	0.0120439120744504	0.0870282977129165	403.530465325309	-0.274658339657806	0.0165362091392459	0.0740605582915186	403.530465325309	-0.962216542886265	1.91402964839527e-15	7.26572400009782e-14	403.530465325309	0.0381842632786626	0.734966820548923	0.924400022254475	403.530465325309	0.0349298285111604	0.755189982780158	0.970342365546299	403.530465325309	-0.105356290213186	0.355565037022725	0.500392605589551	403.530465325309	-0.64631211200413	6.7182566849614e-08	5.13220016438939e-07	403.530465325309	0.253237001364502	0.0283318187509299	0.456499461396257	403.530465325309	0.323193660584258
ENSG00000142677.3	IL22RA1	chr1	24446261	24469611	-	23350	351	33	12	13	FALSE	12.9912678507	1.75868218055843	0.000186396323983495	0.00761221385670984	12.9912678507	2.37176075731358	2.06061599961633e-07	1.45543672694213e-05	12.9912678507	0.872516361555732	0.0847574842328392	0.234765426433422	12.9912678507	1.74507277218491	0.000264683356645242	0.00109969936557958	12.9912678507	1.57622248667039	0.000893126085243058	0.0520004559225637	12.9912678507	1.44026099104232	0.00231730433359412	0.0502977618201021	12.9912678507	-0.158373433045224	0.786379873375434	0.860215582507205	12.9912678507	0.58396896476983	0.28405047386637	0.370689524959338	12.9912678507	-0.182459693888042	0.655534075040933	NA	12.9912678507	-0.931499766271257
ENSG00000001461.12	NIPAL3	chr1	24742284	24799466	+	57182	2068	111	78	76.5925925925926	FALSE	77.450476923527	-0.0593095194054316	0.767696724387777	0.853359478076557	77.450476923527	0.241598488102787	0.218083608026752	0.464121128764269	77.450476923527	0.330544060461865	0.0888342168511035	0.241630191479154	77.450476923527	0.825446540365594	1.42570595026997e-05	8.6516254742791e-05	77.450476923527	-0.185972782719469	0.357560950834673	0.764614543784949	77.450476923527	-0.351355141743731	0.0814832204884354	0.476865076908158	77.450476923527	0.497466500693893	0.0098428202270067	0.0313899266825006	77.450476923527	0.828898478089887	1.63496874459796e-05	7.55416926123359e-05	77.450476923527	-0.126663263314037	0.547189362587327	0.822730306344454	77.450476923527	-0.592953629846518
ENSG00000133226.12	SRRM1	chr1	24958207	24999758	+	41551	17732	1274	610	656.740740740741	FALSE	633.447199580809	0.183991037136766	0.308855565144217	0.475846308751603	633.447199580809	-0.156095474391139	0.390026461530413	0.633765419386681	633.447199580809	-0.334918615253281	0.0657015531125486	0.19785759980137	633.447199580809	-0.0510883556877319	0.778686349398261	0.834673500779303	633.447199580809	0.0955480153698725	0.597370163872836	0.86936981964064	633.447199580809	0.035203334046426	0.845488945008707	0.980440289108405	633.447199580809	-0.32633027130244	0.0731479409524522	0.153473945909226	633.447199580809	0.135225604846782	0.457005773131132	0.546871093885705	633.447199580809	-0.0884430217668938	0.625707155044319	0.863776678615109	633.447199580809	0.191298808437565
ENSG00000169504.10	CLIC4	chr1	25071848	25170815	+	98967	7893	462	295	292.333333333333	FALSE	284.894712927058	-0.468097922021155	0.00482925570892722	0.0460328500484799	284.894712927058	-0.0976910173734187	0.551013055551946	0.749573785345994	284.894712927058	0.647291189437596	5.25481436827392e-05	0.000802849918642134	284.894712927058	0.682095891634739	2.20640771029966e-05	0.000127259807494325	284.894712927058	-0.298250806708873	0.069904305671866	0.516415982184148	284.894712927058	0.0492046036983342	0.76056442399923	0.971650651089899	284.894712927058	0.429209926753931	0.00776137034175142	0.0256342384955431	284.894712927058	-0.0146475645197855	0.92958442817437	0.946499942996401	284.894712927058	0.169847115312282	0.317026985985662	0.681164837755481	284.894712927058	0.146895621071753
ENSG00000117614.5	SYF2	chr1	25549170	25558993	-	9823	6695	373	245	247.962962962963	FALSE	245.880501932055	0.105147623282325	0.435602931748929	0.592919707701497	245.880501932055	0.0757915090250322	0.5757832708299	0.769705933096687	245.880501932055	-0.00105423166873999	0.993808072223592	0.996936010249993	245.880501932055	0.367803876243026	0.00629950379060657	0.0161124440972564	245.880501932055	-0.0228191632155945	0.866232452617037	0.966330777599059	245.880501932055	-0.0236599683039465	0.859888681239087	0.983785848380802	245.880501932055	0.251486204443041	0.0613449239471745	0.133792327373116	245.880501932055	0.517492790493364	0.000123464133924441	0.000457587286893293	245.880501932055	-0.12796678649792	0.352787963143651	0.705324473712004	245.880501932055	-0.0994514773289788
ENSG00000117616.13	C1orf63	chr1	25568728	25664704	-	95976	5837	420	189	216.185185185185	FALSE	210.181733226085	0.262467989990939	0.40406702775353	0.566337927480834	210.181733226085	0.457589995311084	0.144898012607179	0.373381033084946	210.181733226085	0.959055943414643	0.00211088808635569	0.0159753797764595	210.181733226085	0.360531030497792	0.252765132743571	0.35022948204717	210.181733226085	0.654969893348919	0.036255921581332	0.419783982067872	210.181733226085	0.631370448105332	0.0431201780171597	0.349545224810786	210.181733226085	1.33474385830664	1.78472767097218e-05	0.000155343417583508	210.181733226085	0.972003703994979	0.00192114370125395	0.00506873707094467	210.181733226085	0.39250190335798	0.210703821639177	0.595790544050294	210.181733226085	0.173780452794248
ENSG00000183726.6	TMEM50A	chr1	25664408	25688852	+	24444	4516	336	169	167.259259259259	FALSE	156.853814423963	-0.726796543211733	0.0244092271900673	0.103358383634796	156.853814423963	-0.302318893222966	0.345573024727885	0.593069658251382	156.853814423963	0.291175795640937	0.35937708235495	0.582643898147244	156.853814423963	-0.455082956335697	0.158407081942603	0.240231225818271	156.853814423963	-0.493092002608508	0.124660777357655	0.592837035085815	156.853814423963	0.31081092552357	0.326439656248186	0.814033793603139	156.853814423963	0.289998670448255	0.361675071953124	0.506632701382821	156.853814423963	-0.240513850356832	0.455766322950612	0.54578676242791	156.853814423963	0.233704540603226	0.474670448484158	0.783071992837585	156.853814423963	0.613129818746536
ENSG00000204178.5	TMEM57	chr1	25757388	25826700	+	69312	1908	111	72	70.6666666666667	FALSE	68.9723940974363	-0.063026550806016	0.805594611224058	0.878821213434322	68.9723940974363	0.097253838918275	0.702214485245774	0.848903229428007	68.9723940974363	0.170260169660101	0.500894809407267	0.704227536737219	68.9723940974363	-0.112650003053372	0.665931051057104	0.744174279206208	68.9723940974363	0.266492720335644	0.28801273909711	0.716242143563558	68.9723940974363	0.20779098570894	0.404350936368746	0.858178399423057	68.9723940974363	0.555957113744033	0.0255410908475243	0.0668408944178478	68.9723940974363	0.176332307335681	0.49546886704314	0.583099594005837	68.9723940974363	0.32951927114166	0.200915746320123	NA	68.9723940974363	0.110537146790665
ENSG00000157978.7	LDLRAP1	chr1	25870071	25895377	+	25306	5598	374	217	207.333333333333	FALSE	200.631027039962	0.47271604687267	0.0246620877547599	0.103918440187172	200.631027039962	0.30306379296919	0.151634084465001	0.382408435531385	200.631027039962	-0.225653201076125	0.29218902657676	0.51731926073802	200.631027039962	-0.246410393106847	0.253723183939817	0.351274530207166	200.631027039962	0.45430055591123	0.0307722007005494	0.39307511668912	200.631027039962	-0.0733261452891025	0.729186381979796	0.961499472612073	200.631027039962	-0.48773206459728	0.0243633433362256	0.0643195249780196	200.631027039962	-0.401507414754387	0.06647616364712	0.109526788173467	200.631027039962	-0.0184154909614405	0.930187750130351	0.979053147885791	200.631027039962	-0.376389938258293
ENSG00000162430.12	SEPN1	chr1	26126667	26144713	+	18046	1357	107	50	50.2592592592593	FALSE	48.570733849929	0.240587390813853	0.496792222333004	0.647829688232975	48.570733849929	-0.0816447570961994	0.819960502285253	0.91928176531252	48.570733849929	-0.241697028242245	0.502838840971551	0.705791164297291	48.570733849929	0.411915342332856	0.245568057909367	0.34273727810253	48.570733849929	0.108780108065399	0.759326521792148	0.932865217890354	48.570733849929	-0.304809743076426	0.394249122379301	0.850358924924809	48.570733849929	-1.54791616650202	8.79124290566662e-05	0.000614388808743952	48.570733849929	0.103454796847394	0.774678829635276	0.824226135938656	48.570733849929	-0.131807282748454	0.712119581706699	NA	48.570733849929	-0.223164985980226
ENSG00000117640.13	MTFR1L	chr1	26145131	26159432	+	14301	2206	109	82	81.7037037037037	FALSE	81.4042745551617	0.595798110997622	0.0145242520527552	0.0793630183504068	81.4042745551617	0.537946578417139	0.0280775453042935	0.146101574811049	81.4042745551617	0.194964840653312	0.433579886364668	0.648896939510006	81.4042745551617	0.160638754221028	0.525000697185164	0.619886408282345	81.4042745551617	0.545760947824088	0.0251954601187664	0.361990717117746	81.4042745551617	0.402795672895146	0.0977309253819692	0.511583781645652	81.4042745551617	0.660157439957469	0.00681658597211929	0.0230076464245014	81.4042745551617	0.608276488469264	0.0143854169167209	0.0292632524956053	81.4042745551617	-0.0500371631735343	0.836302359109612	0.948498297282619	81.4042745551617	-0.135150905521993
ENSG00000127423.6	AUNIP	chr1	26158414	26185903	-	27489	1041	84	39	38.5555555555556	FALSE	36.8649994478913	0.542032627781835	0.164345379570431	0.318955886432074	36.8649994478913	-0.018073122475653	0.963769625633754	0.983831751296842	36.8649994478913	-0.233467514760539	0.56055331490205	0.748301768320831	36.8649994478913	-0.889443042639484	0.0351792748315678	0.0700091942779722	36.8649994478913	0.473508931620267	0.224789297421636	0.677454552006019	36.8649994478913	0.28122750340246	0.470825917529743	0.889131477395089	36.8649994478913	-0.367349563785409	0.364353585350045	0.509598254335552	36.8649994478913	-1.7180496882727	0.000215121790167723	0.000745058065062407	36.8649994478913	-0.0685236961615686	0.86017141766656	NA	36.8649994478913	0.299300625878113
ENSG00000117632.16	STMN1	chr1	26210672	26233482	-	22810	81870	5894	2918	3032.22222222222	FALSE	2881.60455400265	-0.0350400022329066	0.748542038111177	0.840853440542825	2881.60455400265	-0.239033121159819	0.0290219309731245	0.148681319378962	2881.60455400265	-0.44631126334527	4.68737792668193e-05	0.000735721959821826	2881.60455400265	-0.544853701639691	7.20366408260289e-07	6.16424760673178e-06	2881.60455400265	0.066528218291841	0.542452463955553	0.849181563097742	2881.60455400265	0.00537395340309003	0.960728765904567	0.995488007933292	2881.60455400265	-0.376704312318548	0.000590198010703	0.00303507734064671	2881.60455400265	-0.873553029172778	2.87091456409221e-15	7.54227768255566e-14	2881.60455400265	0.101568220524748	0.353579187016096	0.705900085110427	2881.60455400265	0.244407074562909
ENSG00000158006.9	PAFAH2	chr1	26286258	26324648	-	38390	688	49	27	25.4814814814815	FALSE	24.631450938675	0.195408700812944	0.53022856797495	0.675385006687382	24.631450938675	0.252666040075438	0.416641141349515	0.652576866275498	24.631450938675	0.0157220948079726	0.960399637176254	0.983392924871093	24.631450938675	0.0971190651481981	0.761905215083811	0.821385867431152	24.631450938675	-0.00412665999722765	0.989551351636987	0.996768492594782	24.631450938675	-0.50280280077277	0.121212284784948	0.562156220663024	24.631450938675	-0.488658120285829	0.145862449685546	0.261146214199117	24.631450938675	-0.855316847972326	0.0197968684594105	0.0385774797636229	24.631450938675	-0.199535360810171	0.534198525120983	NA	24.631450938675	-0.755468840848208
ENSG00000142684.7	ZNF593	chr1	26496362	26498551	+	2189	12765	825	456	472.777777777778	FALSE	467.148727628275	0.709449845899892	0.000603426078158004	0.0151626273159024	467.148727628275	0.316467178001231	0.127566601345722	0.35052340682273	467.148727628275	-0.0455326885208971	0.827163633954717	0.913464105598088	467.148727628275	0.300239750075098	0.149226531566685	0.229244359596371	467.148727628275	0.349194118217586	0.0922989283228168	0.549275982225257	467.148727628275	-0.237632645237591	0.254032965134485	0.755537107008235	467.148727628275	-0.576510033776281	0.00619075744197932	0.021344785195079	467.148727628275	0.0430663080038153	0.837148022496713	0.87481257698935	467.148727628275	-0.360255727682305	0.0817145284932181	0.509367023683573	467.148727628275	-0.554099823238822
ENSG00000130695.9	CEP85	chr1	26560691	26605299	+	44608	598	48	22	22.1481481481481	FALSE	20.7827919399419	0.0159796423260645	0.96528980063243	0.977656583456705	20.7827919399419	-0.349965101171967	0.355366370211762	0.601727650248528	20.7827919399419	-0.428783753014217	0.259501648199561	0.480566935999166	20.7827919399419	-0.505344759185006	0.195628027938297	0.285329505203844	20.7827919399419	-0.131228048536685	0.722547149656947	0.919809246357499	20.7827919399419	-0.207131314270846	0.572152089986869	0.928203488589982	20.7827919399419	-1.10590428855913	0.00706323335480982	0.0237193615816041	20.7827919399419	-0.616048890322647	0.124703808334183	0.186073197647732	20.7827919399419	-0.14720769086275	0.697380063353602	NA	20.7827919399419	0.14283378690112
ENSG00000142669.9	SH3BGRL3	chr1	26605667	26608007	+	2340	11904	670	438	440.888888888889	FALSE	443.643995861216	0.597069613294524	0.00223641484462192	0.0309328839744897	443.643995861216	0.490029926148176	0.012287868654163	0.0881636671048483	443.643995861216	0.255470263027806	0.193177350785532	0.400724417842785	443.643995861216	1.07376240212564	3.52845273456266e-08	3.9901151199116e-07	443.643995861216	0.218992211933804	0.264477099535692	0.69969794673527	443.643995861216	0.0295607046154356	0.880243989191998	0.98474254093816	443.643995861216	-0.271820409951892	0.171068292814999	0.293757445241954	443.643995861216	0.884123685659293	6.2331760058635e-06	3.13917461382383e-05	443.643995861216	-0.378077401360721	0.053557345878779	0.488669628902345	443.643995861216	-0.46046922153274
ENSG00000117682.12	DHDDS	chr1	26758773	26797785	+	39012	1993	130	75	73.8148148148148	FALSE	70.8603449661624	0.113120499552177	0.553130895599159	0.694395240002615	70.8603449661624	0.36478731098477	0.0518266101510374	0.206946200033127	70.8603449661624	0.0590773417602229	0.758240322588843	0.876377333723736	70.8603449661624	-0.101586092239179	0.609836494421013	0.696021334096142	70.8603449661624	0.322789018236795	0.0839264770299492	0.537291569514912	70.8603449661624	0.0765584086967506	0.683091715531131	0.949693661299089	70.8603449661624	-0.541047673885308	0.00858470670568697	0.0278833085876007	70.8603449661624	-0.612687583625571	0.0045127696996047	0.0107159157729701	70.8603449661624	0.209668518684618	0.274250363168666	NA	70.8603449661624	-0.288228902288019
ENSG00000117676.9	RPS6KA1	chr1	26856252	26901521	+	45269	1760	126	69	65.1851851851852	FALSE	63.5717479875894	0.238451709707415	0.360114178712704	0.525593475265476	63.5717479875894	0.275585983580029	0.290425065094921	0.54145611796914	63.5717479875894	-0.313427569160839	0.243156787229956	0.463379602745144	63.5717479875894	-0.0795024852548419	0.766882061377179	0.824610748335502	63.5717479875894	0.205574441563443	0.429867029299009	0.798643804379319	63.5717479875894	-0.202067650804832	0.442264389405902	0.877130292466514	63.5717479875894	-1.01377655586806	0.000372121513257785	0.00204761882486739	63.5717479875894	-0.27748425869889	0.312639035368357	0.401372253839263	63.5717479875894	-0.0328772681439718	0.900386541347817	NA	63.5717479875894	-0.477653634384862
ENSG00000117713.13	ARID1A	chr1	27022524	27108595	+	86071	6253	419	245	231.592592592593	TRUE	225.799694395169	0.174091374751801	0.508092301661878	0.657490818954858	225.799694395169	0.228468124540368	0.385062961061391	0.629166241738838	225.799694395169	-0.194713104015832	0.461946572890446	0.673763307142345	225.799694395169	0.291087834821789	0.269273223576531	0.367510142237959	225.799694395169	0.00859898101991712	0.973970361257312	0.992531262051219	225.799694395169	-0.244758523371724	0.35338492693058	0.831999430426451	225.799694395169	-0.626604788659834	0.0191366187277847	0.0528616193057727	225.799694395169	0.385468852779491	0.144090749029627	0.209805674955779	225.799694395169	-0.165492393731884	0.531402793225626	0.813149173715727	225.799694395169	-0.473226647912091
ENSG00000204160.7	ZDHHC18	chr1	27153201	27184093	+	30892	2362	187	82	87.4814814814815	FALSE	84.392654085763	0.118539323206631	0.5145787413998	0.662997161280214	84.392654085763	-0.195021860268761	0.297261013109607	0.548916282786741	84.392654085763	-0.320743127523573	0.0892102038852463	0.242270509574273	84.392654085763	0.122065151356536	0.509484207831829	0.606300983135875	84.392654085763	-0.0287430063300293	0.875285679659762	0.969562196424733	84.392654085763	-0.36212860282664	0.0504851594268515	0.380937494554448	84.392654085763	-0.551731449802259	0.00451279589650058	0.0164634895174198	84.392654085763	-0.217740698394424	0.260524190335693	0.345215584825876	84.392654085763	-0.14728232953666	0.430743726558133	0.755856210819871	84.392654085763	-0.16710674255788
ENSG00000175793.10	SFN	chr1	27189633	27190947	+	1314	3758	271	137	139.185185185185	FALSE	144.286574261017	0.816187370594276	0.00660257613736467	0.0541664369261974	144.286574261017	1.1714765777123	8.97227831701201e-05	0.00263870724428985	144.286574261017	0.287505965175189	0.344018329244417	0.56758644478723	144.286574261017	1.03821958744386	0.000551205175430597	0.00206420469217099	144.286574261017	0.468561426386025	0.121025281457318	0.587484729130148	144.286574261017	0.00513944440176633	0.986509896013089	0.998588534801244	144.286574261017	0.165655060750114	0.587352087883698	0.711502765065446	144.286574261017	1.40519282532151	2.75094401499556e-06	1.51372187593976e-05	144.286574261017	-0.347625944208251	0.246673294473349	0.62503937759507	144.286574261017	-1.16633713331054
ENSG00000142751.10	GPN2	chr1	27202624	27216788	-	14164	1200	85	39	44.4444444444444	FALSE	42.4831725422531	-0.0771906557694845	0.724230775477424	0.824398493036851	42.4831725422531	-0.307045789851632	0.172765547157803	0.410908285911893	42.4831725422531	-0.84982496665293	0.00040313501535305	0.00412567034120812	42.4831725422531	-0.57401855780565	0.0159455998039726	0.0357355613812306	42.4831725422531	-0.239078975889872	0.279456932882772	0.709720126923326	42.4831725422531	-0.20844049023157	0.335440051133925	0.817759115076542	42.4831725422531	-0.587250630324294	0.012085138594117	0.0369413406404776	42.4831725422531	-0.416212624731434	0.0797115092588951	0.127624317221089	42.4831725422531	-0.161888320120387	0.48209731392129	NA	42.4831725422531	0.0986052996200616
ENSG00000198746.8	GPATCH3	chr1	27216979	27226957	-	9978	2004	121	75	74.2222222222222	FALSE	73.3829433519312	0.20316757761453	0.306668643045672	0.474427952805127	73.3829433519312	0.388855522028265	0.0480261792808494	0.198371946467389	73.3829433519312	-0.135707123299984	0.507880303184473	0.709994252521188	73.3829433519312	0.0508566227153877	0.804508434624946	0.855646652821915	73.3829433519312	0.140804269371223	0.478928890555948	0.820340233069725	73.3829433519312	-0.0689860465551267	0.729051858499256	0.961469217123981	73.3829433519312	0.118743328597779	0.555685897085271	0.685518307112925	73.3829433519312	0.353534693534181	0.0810931876802003	0.129499629028963	73.3829433519312	-0.0623633082433068	0.758022426886292	NA	73.3829433519312	-0.457841568583391
ENSG00000090273.9	NUDC	chr1	27226729	27273353	+	46624	11421	821	409	423	FALSE	407.152152009006	0.347593341658738	0.0127358429971074	0.073640032398683	407.152152009006	-0.0177522999909558	0.899820051774849	0.952783163694259	407.152152009006	-0.270531443682295	0.0567978580233021	0.179211696296885	407.152152009006	-0.188702292124852	0.185923653195683	0.273676822614827	407.152152009006	0.172958309396954	0.216585844919839	0.674979626696812	407.152152009006	-0.059495631408744	0.671030523022656	0.945819984273231	407.152152009006	-0.529879863485166	0.000227193440184628	0.00135670538743655	407.152152009006	-0.424928472693842	0.00340929401427173	0.00839729518894044	407.152152009006	-0.174635032261784	0.213105173300152	0.599861371420899	407.152152009006	-0.0417433314177882
ENSG00000253368.3	TRNP1	chr1	27320198	27327389	+	7191	3539	201	133	131.074074074074	FALSE	128.455724644003	0.344094663677675	0.112690599120582	0.254936963145723	128.455724644003	0.303545433748468	0.16294193103311	0.397797736251506	128.455724644003	-0.402838986462386	0.0719340414282189	0.210596945106964	128.455724644003	-0.204062953050952	0.362297135054479	0.467212572996775	128.455724644003	0.347395623668568	0.108770394601778	0.565960594427347	128.455724644003	-0.133074219170999	0.542842095021919	0.917408678301738	128.455724644003	-0.0319870010939416	0.884742415341075	0.928150157413446	128.455724644003	-0.0558982141394794	0.803188994759648	0.84748472861998	128.455724644003	0.00330095999089216	0.987879792181712	0.997010589496796	128.455724644003	-0.436619652919466
ENSG00000090020.6	SLC9A1	chr1	27425306	27493472	-	68166	746	61	26	27.6296296296296	FALSE	26.2186751526777	-0.0382824284937909	0.919408103121747	0.950639557005993	26.2186751526777	0.142616566619888	0.703975715769289	0.850435825428847	26.2186751526777	-0.472941022386522	0.226069033559495	0.442635051620579	26.2186751526777	-0.201698869635703	0.6039960112552	0.690727754344533	26.2186751526777	0.563752834483456	0.123377962504847	0.590937549367296	26.2186751526777	0.0716701221228527	0.846780913367005	0.980820144407289	26.2186751526777	-0.973933597360708	0.0180036931393988	0.0503204099196237	26.2186751526777	-0.159705117657836	0.68410459499258	0.750850757234882	26.2186751526777	0.602035262977247	0.109169093142684	NA	26.2186751526777	-0.0709464444970349
ENSG00000142784.11	WDTC1	chr1	27561007	27635110	+	74103	1895	126	62	70.1851851851852	FALSE	71.3075232692718	0.402451897362757	0.10876870087572	0.249138728188751	71.3075232692718	0.834243318426181	0.000692835915888478	0.0130068999721373	71.3075232692718	0.445290405948512	0.0755965802513575	0.217355933275258	71.3075232692718	1.25843529473825	2.32749309531175e-07	2.19431159762597e-06	71.3075232692718	-0.030387954770158	0.905976489037678	0.980261100707895	71.3075232692718	-0.18949758301714	0.460308216922254	0.884584278594796	71.3075232692718	0.214581169662505	0.400658791080775	0.545673589812397	71.3075232692718	1.20302148085422	9.85945968744242e-07	5.97461069807956e-06	71.3075232692718	-0.432839852132915	0.0933763261236588	NA	71.3075232692718	-1.02374090144332
ENSG00000186501.10	TMEM222	chr1	27648651	27662891	+	14240	677	52	23	25.0740740740741	FALSE	24.4296281185855	0.410773910617237	0.183559961425305	0.342310125612123	24.4296281185855	-0.254696283342907	0.435705820631546	0.666955745710577	24.4296281185855	-0.454009927614182	0.171858844723404	0.372507825474587	24.4296281185855	-0.458946856710432	0.17740146486104	0.263927559169126	24.4296281185855	-0.568131453784838	0.0885705337800853	0.546322326115244	24.4296281185855	-0.561425259156313	0.0861686766216673	0.487836110493275	24.4296281185855	-0.64929324023782	0.0576196317899609	0.127506809327858	24.4296281185855	-0.120996701697704	0.716587711666774	0.777941794022609	24.4296281185855	-0.978905364402075	0.00341715520053651	NA	24.4296281185855	-0.306728975813406
ENSG00000142733.10	MAP3K6	chr1	27681675	27693383	-	11708	871	50	30	32.2592592592593	FALSE	31.3087421104625	0.404086056093544	0.179862617873157	0.337737236481367	31.3087421104625	0.18740137571786	0.54151309219487	0.743535725002216	31.3087421104625	-0.339070775173134	0.290051178823885	0.515227995861764	31.3087421104625	0.0142564735111802	0.964043712276201	0.973438512314475	31.3087421104625	0.170441113467274	0.576366364929549	0.859561953374511	31.3087421104625	0.0722110362026546	0.811662046525851	0.976230426249868	31.3087421104625	-0.348928285265321	0.279921702280858	0.421988332497227	31.3087421104625	0.126235297338428	0.690874050056398	0.756834692262393	31.3087421104625	-0.23364494262627	0.445159105079405	NA	31.3087421104625	-0.115190339515205
ENSG00000158195.6	WASF2	chr1	27730730	27816669	-	85939	18058	1046	680	668.814814814815	FALSE	664.521802121637	0.255381873866923	0.154047512354768	0.305578401450818	664.521802121637	0.293993744694672	0.100854239108737	0.307088684946992	664.521802121637	-0.0865215341730971	0.630675895411799	0.796152093578006	664.521802121637	0.382823888713906	0.0328275825176067	0.0660923548023871	664.521802121637	0.0831558215073899	0.643062782086122	0.890780195001213	664.521802121637	-0.0712898808944237	0.690982051572215	0.953088406470476	664.521802121637	0.0251025337359697	0.88898947979225	0.930905620047371	664.521802121637	0.669717242798712	0.000185943671960275	0.000655327861464902	664.521802121637	-0.172226052359533	0.338051494291761	0.696059897852027	664.521802121637	-0.365283625589095
ENSG00000126705.9	AHDC1	chr1	27860546	27930942	-	70396	2715	255	90	100.555555555556	FALSE	96.2416353105065	-0.194735337860827	0.608213314036074	0.738581472244765	96.2416353105065	0.110793100853729	0.769459277257219	0.89149799771937	96.2416353105065	-0.0239400186303401	0.949604565527127	0.979543349815279	96.2416353105065	0.0328889418763905	0.931014335407432	0.950426552328615	96.2416353105065	-0.00709557928755447	0.985032880949997	0.99493028939985	96.2416353105065	-0.133533286653126	0.72370510064912	0.958849470327948	96.2416353105065	-0.0700880934795147	0.853500637385268	0.907640996217309	96.2416353105065	0.713669334865407	0.0581255404918673	0.0974640557342713	96.2416353105065	0.187639758573273	0.623517679607395	0.863048850811631	96.2416353105065	-0.244326387506854
ENSG00000126709.10	IFI6	chr1	27992572	27998729	-	6157	230528	14332	8111	8538.07407407407	FALSE	8686.49624326702	1.10675464369044	2.35867343203595e-09	5.64574693440383e-07	8686.49624326702	1.61964947053965	2.29759532202374e-18	6.18699340308704e-16	8686.49624326702	2.02593767249879	7.62497658808222e-28	3.45812753997392e-25	8686.49624326702	2.28326891120898	6.47157776936409e-35	1.59330244681744e-32	8686.49624326702	0.921607813051309	6.65173494152722e-07	0.000127917180433274	8686.49624326702	1.49699160342661	6.44616810988921e-16	1.79182679364243e-13	8686.49624326702	1.32138630131373	1.00499937424078e-12	5.00582636290914e-11	8686.49624326702	1.48021453465907	1.4021934238887e-15	3.89764539795127e-14	8686.49624326702	-0.185146830639131	0.317511725600846	0.681423404981159	8686.49624326702	-0.122657867113043
ENSG00000117758.9	STX12	chr1	28099694	28150963	+	51269	3185	160	117	117.962962962963	FALSE	116.696676533147	0.0811173265382361	0.602331410094474	0.733817299700846	116.696676533147	0.357451951019715	0.0187777117015084	0.116408303404243	116.696676533147	0.580468835003143	9.50852197974631e-05	0.00129234911513366	116.696676533147	0.800713009604431	7.16928580901087e-08	7.67425289642816e-07	116.696676533147	0.399128023493586	0.00782962211555449	0.218775051473948	116.696676533147	0.331048389143034	0.0258392921229034	0.263527617124726	116.696676533147	0.520232356388976	0.000540657143580867	0.00281671257934482	116.696676533147	0.551360990212084	0.000348231268932148	0.0011439987969456	116.696676533147	0.31801069695535	0.0411192520005391	0.46324031649653	116.696676533147	-0.0264035618766801
ENSG00000117751.13	PPP1R8	chr1	28157289	28178187	+	20898	2104	138	76	77.9259259259259	FALSE	75.4402408582105	0.308610200527748	0.0868530449696166	0.216054471276901	75.4402408582105	-0.141119633782308	0.454416085979987	0.682059469236988	75.4402408582105	-0.118645427311467	0.527213889119341	0.726067138012044	75.4402408582105	-0.320774356872571	0.102715947766245	0.17070459438799	75.4402408582105	0.149549328621131	0.410680525176135	0.791042797025323	75.4402408582105	0.194657757230481	0.275208092822492	0.773643443900035	75.4402408582105	0.124877842568969	0.498421553077812	0.635309201250687	75.4402408582105	0.0055939628480751	0.976804685731929	0.983079418004209	75.4402408582105	-0.159060871906617	0.386785276879068	NA	75.4402408582105	0.335777391012789
ENSG00000130775.11	THEMIS2	chr1	28199055	28213196	+	14141	608	62	18	22.5185185185185	FALSE	23.0041220012121	1.61634783824364	0.000278793925097023	0.00968696472806874	23.0041220012121	2.61039661725927	3.86605422304369e-10	4.56353277259829e-08	23.0041220012121	2.38386870254551	1.55465044942573e-08	6.97730360557369e-07	23.0041220012121	3.8111520945655	2.08769314497491e-21	1.60621891341507e-19	23.0041220012121	1.64938108237129	0.000184025840207293	0.015395637524915	23.0041220012121	2.67455971057469	7.0384192127327e-11	1.02796709078166e-08	23.0041220012121	0.555628716449129	0.273899339419303	0.415672879143384	23.0041220012121	2.48639247949454	6.29156855859684e-09	5.66504140746384e-08	23.0041220012121	0.0330332441276476	0.928267432973189	NA	23.0041220012121	0.06416309331542
ENSG00000117748.5	RPA2	chr1	28218035	28241257	-	23222	2262	162	85	83.7777777777778	FALSE	79.4051006188196	0.0844745833051044	0.637535386280876	0.762194212038671	79.4051006188196	0.00620774433609558	0.972644866983914	0.988009055617162	79.4051006188196	-0.701767031509133	0.000279014305061501	0.00309429377955593	79.4051006188196	-0.806950580225806	5.78537932896253e-05	0.000291706341004506	79.4051006188196	0.00585411268825766	0.974002084169333	0.992531262051219	79.4051006188196	-0.0199163747384418	0.910658236746692	0.991881117603117	79.4051006188196	-0.366755066574163	0.0507636237202399	0.115295241327703	79.4051006188196	-0.769395383555559	0.00015500593797101	0.000558397227214126	79.4051006188196	-0.0786204706168468	0.669021058542166	0.884293815199403	79.4051006188196	-0.0261241190745373
ENSG00000158161.11	EYA3	chr1	28296855	28415207	-	118352	5874	431	237	217.555555555556	FALSE	204.258332363969	-0.249584280879814	0.401949386126327	0.565577704155871	204.258332363969	-0.0698996464137954	0.81407191168269	0.91625622557076	204.258332363969	0.314844993160115	0.287115777279262	0.512655750686988	204.258332363969	-0.838985487631989	0.00556888906653469	0.0145591981451242	204.258332363969	-0.169857047043057	0.567751398183748	0.856947591197996	204.258332363969	0.144649456987252	0.624476227992963	0.934540299019156	204.258332363969	0.300343530444851	0.310281366321287	0.452938257426822	204.258332363969	-0.40390982597816	0.1794911719104	0.251983614915595	204.258332363969	0.0797272338367569	0.790226947517409	0.928949489130127	204.258332363969	0.214549103401047
ENSG00000126698.6	DNAJC8	chr1	28525967	28559536	-	33569	9797	578	359	362.851851851852	FALSE	348.050133189652	-0.124031327577854	0.549996476166958	0.691568602820761	348.050133189652	-0.0483591602652785	0.815628726842637	0.917124844533306	348.050133189652	-0.137622346223204	0.507415512800368	0.709574727978055	348.050133189652	-0.0985472049197735	0.636045915941016	0.71756933237426	348.050133189652	0.0976899170664066	0.636469162790005	0.88692861429822	348.050133189652	0.0555316262238098	0.787746993473655	0.975036592039104	348.050133189652	-0.186692397155078	0.369447698979282	0.514551611783494	348.050133189652	-0.455293205019277	0.0307750071271695	0.0564350364789997	348.050133189652	0.22172124464426	0.287059092397395	0.658381646913078	348.050133189652	0.103890786489088
ENSG00000130770.13	ATPIF1	chr1	28562620	28573417	+	10797	10329	677	374	382.555555555556	FALSE	371.041307700101	0.00643328110183795	0.966479571376757	0.978188662328055	371.041307700101	-0.110988076260125	0.470436483897909	0.692342160362548	371.041307700101	-0.177946483053977	0.247757774789384	0.467598221579209	371.041307700101	-0.0774908426188948	0.61591426560693	0.700453111618703	371.041307700101	-0.112170218756564	0.464637547122689	0.813008279905042	371.041307700101	-0.0358370343989249	0.814029348227476	0.976457375557023	371.041307700101	-0.0659414733381747	0.667974810141079	0.776462630860205	371.041307700101	-0.220111958167488	0.158841113278367	0.227213458353202	371.041307700101	-0.118603499858402	0.443790004355538	0.765108151332073	371.041307700101	0.0751510418611999
ENSG00000130766.4	SESN2	chr1	28586038	28609002	+	22964	7256	394	263	268.740740740741	FALSE	271.19072647212	0.55664499005795	0.00203068037885387	0.0295971581462169	271.19072647212	0.587342494141489	0.00113596922286474	0.0186806236515753	271.19072647212	0.493239651517598	0.0063690782286046	0.0370285499910832	271.19072647212	1.02770178751842	1.0109916312103e-08	1.3002559531551e-07	271.19072647212	0.341388954743009	0.059606010380945	0.490881714106517	271.19072647212	-0.19805584888443	0.279580950532665	0.77714485507741	271.19072647212	0.178190176023553	0.329833297695607	0.472828735026293	271.19072647212	0.744883233622081	4.06830260826136e-05	0.000169930022178324	271.19072647212	-0.215256035314941	0.233578471559143	0.61896331563299	271.19072647212	-0.785398343025919
ENSG00000204138.8	PHACTR4	chr1	28696114	28826881	+	130767	12699	829	471	470.333333333333	FALSE	462.774821335974	0.41758238517546	0.0559057746730506	0.165164984733396	462.774821335974	0.485371266620626	0.0262476235698362	0.141742673281461	462.774821335974	-0.0615868047095179	0.779167779396709	0.886465375635258	462.774821335974	0.454556606690901	0.0377992732659928	0.0742944177976011	462.774821335974	0.159533835342735	0.466143822652436	0.813793991554179	462.774821335974	-0.017603733598015	0.935887771406704	0.993045315246149	462.774821335974	-0.455979266841222	0.0392227928613886	0.0939885445179604	462.774821335974	0.469735692312478	0.0321874292580557	0.0586754977610886	462.774821335974	-0.258048549832725	0.238581112057077	0.62088691456188	462.774821335974	-0.502975000218641
ENSG00000180198.11	RCC1	chr1	28832455	28865812	+	33357	6106	808	166	226.148148148148	FALSE	193.266937958223	-1.86928007010683	0.0123787920062194	0.0727771159982498	193.266937958223	-1.19077891661332	0.11039279137029	0.322808622048338	193.266937958223	-1.10064711024242	0.139945006494711	0.327407231444194	193.266937958223	-3.58328266703362	2.35130789344015e-06	1.76799477467485e-05	193.266937958223	-0.615524934507028	0.408636954813421	0.791042797025323	193.266937958223	-0.294379422096853	0.692504932533039	0.953088406470476	193.266937958223	-1.3604904512088	0.0683104311118072	0.145376879449356	193.266937958223	-2.6417406845254	0.000448792872767209	0.00143072444862562	193.266937958223	1.2537551355998	0.0938086866503996	0.51976265624206	193.266937958223	0.89639949451647
ENSG00000180098.5	TRNAU1AP	chr1	28879597	28905051	+	25454	3398	194	128	125.851851851852	FALSE	121.899998533235	0.478282959725733	0.0037793095967841	0.0408099132775547	121.899998533235	0.326509501874781	0.0508661574979113	0.205303688824488	121.899998533235	0.0566709771455564	0.739017986937559	0.864880890050379	121.899998533235	-0.209243008220802	0.237767329164607	0.333850590746524	121.899998533235	0.356167049981307	0.0317667096310402	0.39669933684357	121.899998533235	0.271660299474986	0.0992337440974757	0.514215538754676	121.899998533235	0.23259569940744	0.168041469100284	0.289660599967422	121.899998533235	0.17712316985076	0.307420950497004	0.395852709269677	121.899998533235	-0.122115909744426	0.460905200683761	0.776013858294087	121.899998533235	-0.0548492023997948
ENSG00000120656.7	TAF12	chr1	28915835	28969597	-	53762	2124	115	79	78.6666666666667	FALSE	77.4720292652215	0.440880690147647	0.014594005921311	0.0793980638870208	77.4720292652215	0.237369546578375	0.198377334823186	0.442739573729964	77.4720292652215	0.0509682730639771	0.785658053653554	0.890813503067493	77.4720292652215	0.564821950404429	0.0019319152906781	0.00601420305627645	77.4720292652215	0.267440239620655	0.142401855544381	0.616311797702629	77.4720292652215	0.190330250832958	0.291887578426223	0.785373362993716	77.4720292652215	0.0406148097152731	0.829783275441396	0.890330280722016	77.4720292652215	0.345802314844712	0.0668185609787651	0.109922783496376	77.4720292652215	-0.173440450526992	0.342104840453641	0.699505902515986	77.4720292652215	-0.0470392957454169
ENSG00000162419.8	GMEB1	chr1	28995244	29045865	+	50621	3899	292	144	144.407407407407	FALSE	138.484287039644	0.167652273697137	0.429322730277724	0.587311313986846	138.484287039644	0.139546189502199	0.511683414177938	0.723646148034022	138.484287039644	-0.415764466030635	0.0555784334910476	0.177049671494402	138.484287039644	-0.241827785465243	0.266345227048662	0.364250062048563	138.484287039644	-0.111017977685966	0.603675231294009	0.872211513759301	138.484287039644	-0.254753897094734	0.232609190310988	0.730734764760223	138.484287039644	-0.28571072579168	0.186985259559304	0.313046819821745	138.484287039644	0.169020748910367	0.432486199691439	0.523564706763294	138.484287039644	-0.278670251383103	0.19608556808865	0.582182169535726	138.484287039644	-0.394300086596933
ENSG00000198492.10	YTHDF2	chr1	29063133	29096287	+	33154	4131	307	153	153	FALSE	145.754376117311	-0.186775122364457	0.15387371455285	0.305443399747041	145.754376117311	-0.222427535146688	0.0919892161338069	0.292033252590444	145.754376117311	-0.40738866194202	0.00238019829672339	0.0174852248276773	145.754376117311	-0.657575252283386	3.38264305137604e-06	2.4514916041806e-05	145.754376117311	-0.181458319799798	0.163548472478762	0.633308886042064	145.754376117311	-0.0510480579188514	0.687343245589757	0.951306898048014	145.754376117311	-0.16244941952065	0.217468192053263	0.351316724957437	145.754376117311	-0.226895688161775	0.0969985647908946	0.150519833027758	145.754376117311	0.00531680256465932	0.968911750031421	0.991922616507342	145.754376117311	0.171379477227836
ENSG00000159023.14	EPB41	chr1	29213603	29446553	+	232950	1400	80	55	51.8518518518519	FALSE	51.4061737063643	0.649546284175356	0.00485278164252281	0.0460392184151919	51.4061737063643	0.534453383561727	0.0219207414578516	0.127370889509311	51.4061737063643	0.0430369081036156	0.85898549520111	0.932668929710824	51.4061737063643	0.725881654509568	0.00184480483846584	0.00577641108032709	51.4061737063643	0.516969418985781	0.0257648704844844	0.364558109958625	51.4061737063643	-0.174287147977936	0.469926960442267	0.889131477395089	51.4061737063643	-0.880707968526092	0.0012156070831046	0.00559555888627797	51.4061737063643	0.141593387945597	0.568919296797062	0.650096483291378	51.4061737063643	-0.132576865189575	0.562093386668405	NA	51.4061737063643	-0.708740531539663
ENSG00000116350.11	SRSF4	chr1	29474255	29508499	-	34244	5160	437	167	191.111111111111	FALSE	180.936849272122	-0.607823619335217	0.00691394583416634	0.0548373502561954	180.936849272122	-0.453563872123526	0.0431490543853909	0.187222987091898	180.936849272122	-0.19403752854866	0.383202874532606	0.605216123505768	180.936849272122	-0.347356782328869	0.122361836079513	0.195765306627769	180.936849272122	-0.320831521105916	0.15002005265075	0.620093469258692	180.936849272122	-0.13276723219476	0.547757848987252	0.918770287896811	180.936849272122	-0.490788342968292	0.0290201223007911	0.0740279437140074	180.936849272122	-0.108496579846031	0.628822103608957	0.702523021755268	180.936849272122	0.286992098229301	0.208782581629772	0.593348674236586	180.936849272122	0.320796639928766
ENSG00000116353.11	MECR	chr1	29519385	29557454	-	38069	1365	90	51	50.5555555555556	FALSE	49.8973705946886	0.339975346280565	0.165284474042889	0.319798648239244	49.8973705946886	-0.396955534652347	0.129380368878901	0.353702613778392	49.8973705946886	-0.578492937854085	0.0296555594666381	0.114490123621873	49.8973705946886	0.0915364141208005	0.718885399958249	0.786820207219641	49.8973705946886	0.436365264640964	0.0721627094452667	0.518374031665088	49.8973705946886	0.1441017160285	0.555152206204478	0.922434739850364	49.8973705946886	-0.00394764067871787	0.987559335509217	0.992512105677971	49.8973705946886	0.540325570646204	0.0296051793208804	0.0545918746432755	49.8973705946886	0.0963899183603986	0.693418630326363	NA	49.8973705946886	0.541057250680848
ENSG00000060656.15	PTPRU	chr1	29563028	29653325	+	90297	1311	85	47	48.5555555555556	FALSE	48.9524137765858	0.492571205706717	0.0607596541044757	0.172403480800503	48.9524137765858	0.863532004297716	0.00080450668224755	0.0144553757254124	48.9524137765858	0.367863521889536	0.165466983268927	0.363546403576835	48.9524137765858	0.778895293922129	0.00292321893249278	0.00847586811131269	48.9524137765858	0.37626376095337	0.153752251946736	0.625239808883918	48.9524137765858	-0.33204501811244	0.226473599163712	0.724407729694345	48.9524137765858	-0.628611448391698	0.0319419040261328	0.079688299650604	48.9524137765858	0.699529481945982	0.00854729242421707	0.0187505139560791	48.9524137765858	-0.116307444753348	0.65846938079834	NA	48.9524137765858	-1.19557702241016
ENSG00000162512.11	SDC3	chr1	31342314	31381608	-	39294	740	60	25	27.4074074074074	FALSE	26.1967564348114	-0.640267716767385	0.0539006805652224	0.161608268764969	26.1967564348114	0.00351488599410643	0.991039620044848	0.996558101689485	26.1967564348114	0.500729627604011	0.0962044648676656	0.255075038081438	26.1967564348114	0.339981396859594	0.271376193185362	0.369588136075643	26.1967564348114	-0.279415115311063	0.379636434644593	0.776983902038821	26.1967564348114	-0.729916938719251	0.0253447121263216	0.261551358553908	26.1967564348114	-0.389821107482216	0.231953392567788	0.368975887715826	26.1967564348114	-0.817917210144761	0.0217498748441481	0.0418251889158724	26.1967564348114	0.360852601456322	0.298654881322702	NA	26.1967564348114	-0.733431824713357
ENSG00000134644.11	PUM1	chr1	31404353	31538838	-	134485	8528	506	303	315.851851851852	FALSE	314.438913560522	0.0807481037509518	0.568467641011027	0.707019617071725	314.438913560522	-0.118097195662937	0.409547011419939	0.647297615078065	314.438913560522	0.311679535968546	0.0264237636610983	0.104686699525372	314.438913560522	0.510926439725192	0.000275307456293195	0.00113944493317889	314.438913560522	-0.068517228755986	0.630002092222728	0.883022323938859	314.438913560522	0.0257694933007007	0.854487051136486	0.983196790636566	314.438913560522	0.455804947948529	0.00112918810603247	0.00525957508631449	314.438913560522	0.831290740647665	2.7108490501329e-09	2.61876527634475e-08	314.438913560522	-0.149265332506938	0.300504858336785	0.671025289250348	314.438913560522	0.143866688963638
ENSG00000060688.8	SNRNP40	chr1	31732417	31769662	-	37245	723	51	25	26.7777777777778	FALSE	25.3780463074669	0.676213103494697	0.0142973627803931	0.0786218092397239	25.3780463074669	0.0853490297735366	0.769602288251688	0.89149799771937	25.3780463074669	-0.188805221721777	0.527786707279204	0.726507676777141	25.3780463074669	-0.890123457517494	0.00866905187340963	0.0211618186949492	25.3780463074669	-0.0290692566231808	0.920605239915403	0.985301434575932	25.3780463074669	-0.128420891763695	0.656935566201548	0.943345498379927	25.3780463074669	-0.226551030849871	0.454141076906669	0.596090427982447	25.3780463074669	-0.910172945686416	0.00884472378648626	0.0193389964141467	25.3780463074669	-0.705282360117878	0.0140648916255757	NA	25.3780463074669	-0.213769921537231
ENSG00000121766.10	ZCCHC17	chr1	31769842	31837783	+	67941	2576	159	88	95.4074074074074	FALSE	91.897273173232	-0.148119435332517	0.447906252333515	0.604362089064999	91.897273173232	-0.261622197020244	0.185305797148145	0.424901557750283	91.897273173232	-0.225715473772538	0.250825104705454	0.470714254188645	91.897273173232	0.0162495425689172	0.933967729235644	0.95231332656769	91.897273173232	0.00743920153616874	0.969171993261602	0.991765995870389	91.897273173232	0.0877866593559685	0.643047977573703	0.939393384950652	91.897273173232	-0.0385500744024239	0.843145431384908	0.900072371437532	91.897273173232	-0.257181889391952	0.205620951833114	0.283267105027329	91.897273173232	0.155558636868686	0.434992925758033	0.759160035578525	91.897273173232	0.349408856376212
ENSG00000142910.11	TINAGL1	chr1	32042116	32053288	+	11172	726	42	25	26.8888888888889	FALSE	26.8200532545711	-0.168479687847176	0.620547061347319	0.749024451410471	26.8200532545711	0.511984702847843	0.113068718440798	0.326950720404147	26.8200532545711	0.0364332576715373	0.913276646702861	0.961009264212792	26.8200532545711	0.517699759323275	0.113718059018928	0.184714140351763	26.8200532545711	-0.0855301443243406	0.799028508980676	0.943957864256441	26.8200532545711	-0.206650090381458	0.536001075566312	0.916109549665805	26.8200532545711	-0.143439313270392	0.675163547083766	0.781133765470034	26.8200532545711	0.617717251028237	0.0602543429463085	0.100486098929425	26.8200532545711	0.0829495435228349	0.813857092819341	NA	26.8200532545711	-0.718634793229301
ENSG00000162517.8	PEF1	chr1	32095463	32110497	-	15034	2318	161	79	85.8518518518518	FALSE	80.9823594221849	-0.378692574919759	0.0467858176565628	0.148273719571864	80.9823594221849	-0.124052448726272	0.508082601998137	0.720801412811648	80.9823594221849	-0.408416142035645	0.0327009914125812	0.122781892375691	80.9823594221849	-0.418202751959352	0.0320094689988117	0.0647325966587093	80.9823594221849	-0.173745454122143	0.352251716935518	0.760975065174276	80.9823594221849	-0.297147251059986	0.109898563842552	0.538913649088093	80.9823594221849	-0.58853436058387	0.00260392073545519	0.010460599057071	80.9823594221849	-1.26025423755132	8.8871289807896e-09	7.79841043049531e-08	80.9823594221849	0.204947120797616	0.296968729693695	0.666931374532276	80.9823594221849	-0.173094802333713
ENSG00000134668.8	SPOCD1	chr1	32256023	32281652	-	25629	569	62	18	21.0740740740741	FALSE	21.2152537806901	0.450871105001867	0.204760378878605	0.367700964305281	21.2152537806901	0.201338910223726	0.581889832578206	0.775343232925066	21.2152537806901	0.572761848847139	0.104100871447137	0.269376091823205	21.2152537806901	1.93048297020681	4.16275631720221e-09	5.84755068790547e-08	21.2152537806901	0.300348011447022	0.402147880552099	0.790262401844444	21.2152537806901	-0.404003811427963	0.285619057400008	0.782917823230117	21.2152537806901	-1.09594364532634	0.0127339250153451	0.0385024464237283	21.2152537806901	-0.17689988610812	0.656382630733536	0.726625016576424	21.2152537806901	-0.150523093554845	0.674800793979543	NA	21.2152537806901	-0.605342721651689
ENSG00000184007.13	PTP4A2	chr1	32372022	32410457	-	38435	50676	3377	1836	1876.88888888889	FALSE	1804.00681736848	-0.0234749462680121	0.82685117667256	0.892629443053733	1804.00681736848	-0.00841231355863948	0.937543697965793	0.971828948077858	1804.00681736848	0.0593089295174447	0.580256243661038	0.762205495674873	1804.00681736848	-0.213151235080714	0.0482429085997147	0.0909648016200748	1804.00681736848	0.0252842229047678	0.813570386304841	0.949915512468388	1804.00681736848	0.135144437723098	0.206122466201928	0.694106816219437	1804.00681736848	-0.0919585534209353	0.392372394631541	0.537702437108776	1804.00681736848	-0.32396198343311	0.00281666933564109	0.00709774034430209	1804.00681736848	0.0487591691727799	0.650738795372058	0.875555098236424	1804.00681736848	0.143556751281737
ENSG00000121774.13	KHDRBS1	chr1	32479430	32526451	+	47021	17278	1229	608	639.925925925926	FALSE	616.930600267803	-0.158970403455105	0.151260554460463	0.302415823152161	616.930600267803	-0.26268433087196	0.018323674839965	0.114333892900781	616.930600267803	-0.0614237800551161	0.578314349081932	0.760350129087429	616.930600267803	-0.190504045424743	0.088457400329716	0.150958909205841	616.930600267803	-0.229966158025295	0.0380739926537922	0.427450827335583	616.930600267803	-0.144970905349874	0.18717643005339	0.67176147345692	616.930600267803	0.0550766967582995	0.617602777780035	0.736796779195702	616.930600267803	0.127243393872695	0.252764709099511	0.336694001902997	616.930600267803	-0.0709957545701896	0.528582057915761	0.811534029804986	616.930600267803	0.117713425522086
ENSG00000121775.13	TMEM39B	chr1	32537632	32568467	+	30835	9568	724	362	354.37037037037	FALSE	328.525009553724	-0.628673080292845	0.0746686184289639	0.195330748331021	328.525009553724	-0.350990516012179	0.318945509606467	0.567724324783913	328.525009553724	-0.275758880673672	0.433362977396481	0.648896939510006	328.525009553724	-1.08941525198729	0.00213948238036224	0.00656082550590085	328.525009553724	-0.282949386537501	0.421337390029118	0.796395018362332	328.525009553724	-0.059934086632274	0.864491218013996	0.983785848380802	328.525009553724	-0.0612170983410691	0.861816953752251	0.913665931407868	328.525009553724	-1.37267196473769	0.000120689442266626	0.000449818738759306	328.525009553724	0.345723693755343	0.328357247220863	0.687806896369343	328.525009553724	0.291056429379905
ENSG00000025800.9	KPNA6	chr1	32573639	32642169	+	68530	15468	892	565	572.888888888889	FALSE	579.180186535944	0.416985757007352	0.0402004956878856	0.13611303392633	579.180186535944	-0.0964063058217031	0.637218980670295	0.809026241632813	579.180186535944	-0.0204299530841634	0.920298272528042	0.964628416783133	579.180186535944	0.588216767099168	0.00382030490182422	0.0105918813832108	579.180186535944	-0.0715015253983546	0.726170181756462	0.920939771346742	579.180186535944	-0.359904388837786	0.0782201687284599	0.46839693810503	579.180186535944	0.151832846503042	0.456543349889905	0.598241187043995	579.180186535944	0.759079392801449	0.000189951203535513	0.0006667248557497	579.180186535944	-0.488487282405707	0.0167477813725517	0.430122247431435	579.180186535944	-0.263498083016083
ENSG00000084652.11	TXLNA	chr1	32645287	32663886	+	18599	4031	287	152	149.296296296296	FALSE	142.757030470227	0.0600856715565648	0.643443659579242	0.765822377706399	142.757030470227	0.0920194625482873	0.478939364874094	0.698150836572778	142.757030470227	-0.44695902771556	0.0010687448007757	0.00923708520389592	142.757030470227	-0.323416686184094	0.0191025270365836	0.0416725254365166	142.757030470227	0.0474714929154716	0.713593203188447	0.916332328039799	142.757030470227	-0.148656658137924	0.250620777788244	0.75197631637584	142.757030470227	-0.420957994758914	0.00215944531939478	0.00906712678930537	142.757030470227	-0.413640697190902	0.00356293054337843	0.00873450142028219	142.757030470227	-0.0126141786410931	0.924502182419057	0.97691792114728	142.757030470227	-0.240676120686211
ENSG00000160050.10	CCDC28B	chr1	32665987	32670988	+	5001	2335	127	83	86.4814814814815	FALSE	88.4657792085707	0.927832832559686	0.00643420904188207	0.0534653609584357	88.4657792085707	0.649019179000768	0.0584210124835403	0.223510007795337	88.4657792085707	0.798388826324895	0.0194209400558252	0.0837169787198829	88.4657792085707	0.895211075626722	0.00894381017005965	0.021752416662547	88.4657792085707	0.676715129007756	0.047863388154778	0.460906452616202	88.4657792085707	0.192861718311269	0.575471868450293	0.929462651425551	88.4657792085707	0.651168947959067	0.0578009740432117	0.127747865529851	88.4657792085707	0.953772103744172	0.00549325599612024	0.0127279878780769	88.4657792085707	-0.251117703551929	0.457787578350638	0.772155235883066	88.4657792085707	-0.456157460689499
ENSG00000084623.7	EIF3I	chr1	32687529	32697205	+	9676	17248	1134	610	638.814814814815	FALSE	619.208668738977	0.291850874451133	0.0838044032228244	0.211647872969249	619.208668738977	-0.173092229841724	0.308346487797877	0.559844434335083	619.208668738977	-0.0539960447219381	0.75014691490254	0.870952736290265	619.208668738977	-0.0364838386914233	0.830112732047852	0.874994668141448	619.208668738977	0.0133991273856499	0.936908047995592	0.98808772811599	619.208668738977	0.0312686549408827	0.853065712185634	0.982726387755372	619.208668738977	-0.176504809335721	0.299202871178854	0.441553543577356	619.208668738977	-0.226150855601125	0.186510694225715	0.260269255407771	619.208668738977	-0.278451747065483	0.100491719972681	0.522420750539714	619.208668738977	0.204360884782606
ENSG00000116478.7	HDAC1	chr1	32757687	32799236	+	41549	18914	1152	689	700.518518518518	FALSE	679.495129992492	0.202698500796769	0.128275303075239	0.27482553122808	679.495129992492	0.0247703902961698	0.853174497281184	0.932020711878665	679.495129992492	0.135419578754331	0.310366432179234	0.537465342863437	679.495129992492	-0.328476015649629	0.0154293593205965	0.0348414017991561	679.495129992492	-0.0720050904570613	0.590665980308589	0.86685696865937	679.495129992492	0.0877986557405834	0.509119647646206	0.908499758553529	679.495129992492	0.326634149661025	0.0141833825722388	0.0418555505565006	679.495129992492	-0.151116858964679	0.26525401620525	0.350655535927089	679.495129992492	-0.274703591253831	0.0409392230811184	0.46324031649653	679.495129992492	0.0630282654444136
ENSG00000175130.6	MARCKSL1	chr1	32799433	32801980	-	2547	3966	486	142	146.888888888889	FALSE	132.53804383492	-1.43252964275191	0.00717491292035912	0.0559114958996605	132.53804383492	-0.469912709867829	0.374738623307765	0.619035636991677	132.53804383492	-0.368033798822321	0.486670239318955	0.692590826129056	132.53804383492	-1.02506341193137	0.0539972682844163	0.10002030541849	132.53804383492	-1.03144717458698	0.0520446923529023	0.474570491010539	132.53804383492	-0.951066779496194	0.0727122104610271	0.454688764544754	132.53804383492	-1.34361041174853	0.0116740977154091	0.0358964415706905	132.53804383492	-2.25666391817605	3.20353721873885e-05	0.000137817674557527	132.53804383492	0.401082468164935	0.454434846689031	0.770956346545696	132.53804383492	-0.481154069628365
ENSG00000160058.14	BSDC1	chr1	32830704	32860332	-	29628	2354	200	70	87.1851851851852	FALSE	83.19119523892	-0.774479831678088	0.0513926707519253	0.157228656094406	83.19119523892	-0.7204558646065	0.0698872064285883	0.24998674047121	83.19119523892	-0.030157398266893	0.938492053856482	0.973514629599291	83.19119523892	-0.457474314330039	0.248676959349373	0.346067402893015	83.19119523892	-0.526507215324751	0.181954151294239	0.646556256372149	83.19119523892	0.213001133265791	0.582734674916	0.930997125814817	83.19119523892	0.39617624228953	0.307806641668029	0.450493023482772	83.19119523892	0.608388357942036	0.118041928694015	0.177702183710051	83.19119523892	0.247972616353337	0.539419381987477	0.817434557793017	83.19119523892	0.933456997872291
ENSG00000160062.10	ZBTB8A	chr1	33005028	33071540	+	66512	1791	144	66	66.3333333333333	FALSE	65.8090834172005	-0.0927520640651618	0.740584372550645	0.835067592601953	65.8090834172005	-0.0289490903217461	0.917634528120534	0.961598031626685	65.8090834172005	-0.327646315250434	0.248270626603152	0.467598221579209	65.8090834172005	0.359778920602938	0.194740534229781	0.284323819630299	65.8090834172005	-0.188968171443606	0.500987472766038	0.831224646331557	65.8090834172005	-0.69763519614948	0.0145296263490987	0.181715225326827	65.8090834172005	-0.957153579442042	0.00127898976542542	0.00584671342635057	65.8090834172005	0.622232657421684	0.0244469108644351	0.0462275687774495	65.8090834172005	-0.0962161073784443	0.737110095465674	NA	65.8090834172005	-0.668686105827734
ENSG00000176261.11	ZBTB8OS	chr1	33065773	33116504	-	50731	1885	178	67	69.8148148148148	FALSE	64.0509353480167	-0.827445966133159	0.016026832903367	0.0828453624045074	64.0509353480167	-0.7525617909	0.0283299584792801	0.146706281379782	64.0509353480167	-0.522081750473594	0.124778224124795	0.304366253038628	64.0509353480167	-0.677874942081001	0.0492449455733916	0.0925100710717059	64.0509353480167	-0.64393030075931	0.0588004987098728	0.489077121026037	64.0509353480167	-0.000779842007080276	0.998133169866037	0.999126954595982	64.0509353480167	-0.389817521400188	0.250672583678898	0.389759230162589	64.0509353480167	-1.21966218011217	0.000645315223331947	0.00195317220915047	64.0509353480167	0.183515665373849	0.602115438665042	NA	64.0509353480167	0.751781948892919
ENSG00000162521.14	RBBP4	chr1	33116743	33151812	+	35069	8041	493	301	297.814814814815	FALSE	291.335351830141	0.332700029039211	0.0258998832187671	0.106427893989564	291.335351830141	0.195700538908035	0.192772438873724	0.434734390414782	291.335351830141	-0.127080503041773	0.403065029812513	0.623341636350788	291.335351830141	0.00328770109048064	0.982800886434796	0.988511475794275	291.335351830141	0.0543607515245875	0.717999892861017	0.917953275487148	291.335351830141	0.115882750757922	0.43741836990955	0.876359062409586	291.335351830141	-0.0962143851129522	0.527248541465196	0.660555493138354	291.335351830141	0.313906792102137	0.038468346491123	0.0686581900816086	291.335351830141	-0.278339277514623	0.0653352172237705	0.495139396925625	291.335351830141	-0.0798177881501129
ENSG00000162520.10	SYNC	chr1	33145507	33169197	-	23690	1181	86	45	43.7407407407407	FALSE	42.5039380639458	0.240635907873325	0.400319609275015	0.564010825227552	42.5039380639458	0.312967726868573	0.273291851519369	0.526012035859372	42.5039380639458	0.879429169853844	0.0015189864381084	0.0123137909391689	42.5039380639458	0.803686922137933	0.00423176698584264	0.0115396000370272	42.5039380639458	-0.142597024628272	0.625823530210233	0.881746911428614	42.5039380639458	-0.501099431285495	0.0906072564138458	0.498571346435574	42.5039380639458	-1.19188650525171	0.00029247571509944	0.00166244276847749	42.5039380639458	-1.79630289279796	1.93034340206024e-06	1.10011700367415e-05	42.5039380639458	-0.383232932501597	0.194992872549922	NA	42.5039380639458	-0.814067158154068
ENSG00000134684.6	YARS	chr1	33240840	33283754	-	42914	7443	429	273	275.666666666667	FALSE	271.5584882047	0.362562528489646	0.0249246665151266	0.10451379628265	271.5584882047	0.104902081144569	0.520409626483881	0.73082949012575	271.5584882047	0.138322076637866	0.395796215304899	0.616593134003824	271.5584882047	0.430062408151901	0.00811974467364873	0.0200205688477794	271.5584882047	0.0715648405362032	0.660441942653513	0.896089258956273	271.5584882047	-0.107717603677974	0.508174666037346	0.908305558440948	271.5584882047	-0.138308596302609	0.401713792735178	0.54676476891471	271.5584882047	0.0365853420622804	0.82555841858364	0.866275300183479	271.5584882047	-0.290997687953442	0.0746956558434483	0.49988264115379	271.5584882047	-0.212619684822543
ENSG00000116497.13	S100PBP	chr1	33282368	33324476	+	42108	3044	171	109	112.740740740741	FALSE	110.793821862728	0.384814355454313	0.0383878053170179	0.1322621824937	110.793821862728	0.357171465168999	0.0557387290267822	0.216969512497535	110.793821862728	0.353471486208209	0.0579521785724466	0.181590517366826	110.793821862728	0.78311951845181	2.09226729976415e-05	0.000121653625654977	110.793821862728	0.261299444871844	0.161589199500983	0.632627956428882	110.793821862728	0.128770074364159	0.488659156408651	0.897437329661838	110.793821862728	0.20608700180007	0.275693945446899	0.41732337973923	110.793821862728	0.544082514246041	0.00393427420232009	0.00953900979217564	110.793821862728	-0.123514910582469	0.509866176978998	0.803392676446162	110.793821862728	-0.22840139080484
ENSG00000121900.14	TMEM54	chr1	33360195	33367039	-	6844	1332	86	49	49.3333333333333	FALSE	47.9995315084668	-0.182652801805709	0.422309428529926	0.582002653035427	47.9995315084668	-0.0467026759158169	0.835851387966604	0.926251467349309	47.9995315084668	0.144020090958681	0.513457724650845	0.715052601156793	47.9995315084668	0.322669182690284	0.144535493072922	0.223682173816337	47.9995315084668	-0.0741570615048445	0.740069445416014	0.926062733649679	47.9995315084668	0.0898556760470361	0.677678396783618	0.948441569771713	47.9995315084668	0.0363053875982225	0.871422258045765	0.920903310961535	47.9995315084668	0.0911685468024786	0.692096460807611	0.757788462869019	47.9995315084668	0.108495740300865	0.646566009907332	NA	47.9995315084668	0.136558351962853
ENSG00000004455.12	AK2	chr1	33473585	33546597	-	73012	27946	1493	979	1035.03703703704	FALSE	1030.91362852771	0.383638692415515	0.0177638607465408	0.0875192613224366	1030.91362852771	0.104947517375053	0.517945984222647	0.729067059173114	1030.91362852771	0.247091190666358	0.127348214743294	0.307788496332057	1030.91362852771	0.263457446922963	0.104686781941872	0.173444722167488	1030.91362852771	0.11422837279297	0.481217464867688	0.821241757668135	1030.91362852771	0.157142345766125	0.331497256307046	0.814033793603139	1030.91362852771	0.53227709447712	0.000999519351862641	0.00476638530990613	1030.91362852771	0.666486584696035	3.90568203880009e-05	0.000164087250370725	1030.91362852771	-0.269410319622544	0.0968241178908009	0.522420750539714	1030.91362852771	0.0521948283910725
ENSG00000142920.12	ADC	chr1	33546705	33586131	+	39426	3248	254	93	120.296296296296	FALSE	122.209761068908	0.0859424957690214	0.710371879047073	0.81341732336926	122.209761068908	0.438306365637177	0.0539186915063133	0.211960476601233	122.209761068908	1.22469894537813	2.53659007068483e-08	1.0750526241103e-06	122.209761068908	1.86903920109662	7.5899046853122e-18	3.86995317593699e-16	122.209761068908	-0.0101169318978795	0.965231588216112	0.990818108729487	122.209761068908	0.0580848863038003	0.799330306202568	0.976230426249868	122.209761068908	1.28514087429534	5.05597327671489e-09	1.14953355476127e-07	122.209761068908	1.4082182420937	2.01152524125365e-10	2.36793893495665e-09	122.209761068908	-0.0960594276669009	0.684887135670379	0.887758047853702	122.209761068908	-0.380221479333377
ENSG00000134686.12	PHC2	chr1	33789224	33896653	-	107429	5009	353	181	185.518518518519	FALSE	175.006622392977	-0.62354663186203	0.0514181679092534	0.157228656094406	175.006622392977	-0.113405531992192	0.721160186386121	0.861761531485559	175.006622392977	0.193143624382473	0.541644618871493	0.735595221562751	175.006622392977	-0.108742609739721	0.732848148152133	0.798653407439854	175.006622392977	-0.297855260262194	0.349222669105813	0.760383100974941	175.006622392977	0.0224898526461518	0.943287601993355	0.993959434783605	175.006622392977	-0.0314678015299987	0.921062143228295	0.951181193812096	175.006622392977	-0.485914751238296	0.131233882133353	0.193791199298475	175.006622392977	0.325691371599836	0.312772404357471	0.678886359184468	175.006622392977	0.135895384638344
ENSG00000163866.8	SMIM12	chr1	35178338	35325417	-	147079	3941	329	142	145.962962962963	FALSE	138.82477330574	-0.0321668082813404	0.818423401076416	0.886531043001317	138.82477330574	-0.214566380755691	0.13257826737794	0.357178870007548	138.82477330574	-0.476983305494892	0.00105756621412049	0.00918689301003139	138.82477330574	-0.380923292309862	0.0097157099131385	0.0233724936687645	138.82477330574	-0.0335013771124662	0.810336452851535	0.948554320472378	138.82477330574	-0.175306231367066	0.207535538140149	0.696120565260282	138.82477330574	-0.777180013262167	2.77987278072991e-07	4.1300282330258e-06	138.82477330574	-0.596607883110475	9.86880039878987e-05	0.000375118892970323	138.82477330574	-0.00133456883112585	0.992595226784598	0.99870985852652	138.82477330574	0.0392601493886246
ENSG00000116560.6	SFPQ	chr1	35641979	35658749	-	16770	46904	4132	1526	1737.18518518519	TRUE	1578.79519438047	-0.494785277223694	0.0292942392857018	0.113963187325008	1578.79519438047	-0.122605996152027	0.588847445678063	0.779894513101041	1578.79519438047	-0.669685251616443	0.00319636398317679	0.0220520964315728	1578.79519438047	-1.63115731549517	9.31536295022519e-13	2.44727080921007e-11	1578.79519438047	-0.0571208591090295	0.801122461244852	0.944567943326588	1578.79519438047	-0.138736661016105	0.540567577793739	0.916808094797948	1578.79519438047	-1.44591139998402	2.25764418693365e-10	7.28618725048963e-09	1578.79519438047	-2.27337142098294	5.45324055996746e-23	3.77251796232598e-21	1578.79519438047	0.437664418114664	0.054057819656776	0.488696469837348	1578.79519438047	-0.0161306648640776
ENSG00000146463.7	ZMYM4	chr1	35734568	35887659	+	153091	3874	254	141	143.481481481481	FALSE	138.223694321763	0.0214579043588246	0.901985974875347	0.940400864549409	138.223694321763	-0.251787386604403	0.156055841260976	0.388583527192376	138.223694321763	0.128338613810203	0.459391506041041	0.671286519850033	138.223694321763	-0.304732809512986	0.0911696412973871	0.154647401389682	138.223694321763	-0.00727878764692994	0.966644789020617	0.991144472511977	138.223694321763	0.0128071772563878	0.940722667962663	0.993901579737265	138.223694321763	-0.206696148440307	0.244007652404406	0.38229344377614	138.223694321763	-0.212723086374107	0.240753291050714	0.323545088737368	138.223694321763	-0.0287366920057546	0.871340323543754	0.958694366126853	138.223694321763	0.264594563860791
ENSG00000142687.13	KIAA0319L	chr1	35899091	36023551	-	124460	12052	623	423	446.37037037037	FALSE	452.128806491025	0.411131522948236	0.0164264306612003	0.0838927890807341	452.128806491025	0.396434505059173	0.020838132712286	0.123835992815013	452.128806491025	0.401516670228545	0.0191902411549627	0.0830549010709763	452.128806491025	0.894831922716725	1.57364977633676e-07	1.54973029973644e-06	452.128806491025	0.0156904416621867	0.92756036543294	0.986556251778905	452.128806491025	-0.120073425568772	0.48595267234122	0.896568514171349	452.128806491025	0.17650304590487	0.306049963961196	0.4487933310676	452.128806491025	1.00831693965392	3.6014581094056e-09	3.37690582467335e-08	452.128806491025	-0.395441081286049	0.0220198188153199	0.453238659175772	452.128806491025	-0.516507930627945
ENSG00000020129.11	NCDN	chr1	36023074	36032875	+	9801	1426	95	51	52.8148148148148	FALSE	52.562581283334	0.449611119817664	0.134691121375785	0.283012287952973	52.562581283334	0.0498364373503943	0.870688542431891	0.940851450086109	52.562581283334	-0.29871038651549	0.33726354667459	0.562236405822198	52.562581283334	-0.540945666998041	0.0915154426393551	0.15517287863505	52.562581283334	0.137534966834799	0.650651534419475	0.892212646736572	52.562581283334	-0.405991396777809	0.188377678818868	0.672715978574895	52.562581283334	-0.462166069052295	0.143097097671139	0.257479158620214	52.562581283334	0.280031180331417	0.363356688961444	0.45542466745902	52.562581283334	-0.312076152982865	0.304111320480498	NA	52.562581283334	-0.455827834128204
ENSG00000126067.7	PSMB2	chr1	36067185	36107445	-	40260	9740	692	350	360.740740740741	FALSE	338.40332116632	-0.33232542015799	0.0926545009473532	0.224333755173741	338.40332116632	-0.217307312045322	0.270892717327138	0.523146807187304	338.40332116632	0.0301821597734585	0.877889242040681	0.943238353948198	338.40332116632	-0.545473336854292	0.00629630025846288	0.0161090318667383	338.40332116632	-0.114843561881385	0.559336646609246	0.855290711466779	338.40332116632	0.188539990694034	0.334335626464252	0.816113926264274	338.40332116632	-0.110306464195574	0.575744975640413	0.701923380743271	338.40332116632	-0.930377704026555	4.72734412810086e-06	2.45246985863005e-05	338.40332116632	0.217481858276606	0.274578121723824	0.648797307829401	338.40332116632	0.405847302739356
ENSG00000142686.7	C1orf216	chr1	36179476	36185073	-	5597	2829	198	107	104.777777777778	FALSE	100.872035252924	0.137931469607969	0.386166703311031	0.55142623736072	100.872035252924	0.30406212910036	0.0538448654743038	0.211766867089035	100.872035252924	-0.337677131023186	0.0425223961721642	0.146859914956128	100.872035252924	-0.11973426307417	0.471792020207296	0.5714691928769	100.872035252924	0.11527735315689	0.467781964458387	0.814508299227466	100.872035252924	-0.20846387549371	0.193944998980649	0.678807496432271	100.872035252924	-0.546252438867457	0.00145510874896414	0.00651021396148702	100.872035252924	-0.287326317662558	0.0952402686769045	0.148244642140971	100.872035252924	-0.0226541164510784	0.889022756147414	0.963177808126413	100.872035252924	-0.512526004594069
ENSG00000092853.9	CLSPN	chr1	36185819	36235568	-	49749	11120	893	406	411.851851851852	FALSE	381.608347753819	0.29086088382069	0.0287806948122911	0.112777134933773	381.608347753819	-0.227945191404806	0.0912902399387865	0.290932130006996	381.608347753819	-0.882787911587801	1.69537881984153e-10	1.15032120398224e-08	381.608347753819	-1.73104830252724	1.00494676174526e-31	1.84247366935295e-29	381.608347753819	0.108021463693348	0.418266837334617	0.794915316137146	381.608347753819	-0.000281177103416389	0.998315316127586	0.999126954595982	381.608347753819	-1.14527420955485	3.58845532756145e-16	2.8898803324857e-14	381.608347753819	-2.15393321817526	2.54012194319617e-43	1.04229670402483e-40	381.608347753819	-0.182839420127342	0.171982275498482	0.562638007794361	381.608347753819	0.22766401430139
ENSG00000134698.10	AGO4	chr1	36273773	36323491	+	49718	1948	111	70	72.1481481481482	FALSE	73.8319169201089	0.222974263973099	0.309288877586936	0.47639958183526	73.8319169201089	0.0516360732946753	0.81738909538239	0.917358620170023	73.8319169201089	0.437097838942828	0.0429091126216774	0.147721863148619	73.8319169201089	1.24682346133228	1.93762579512545e-09	2.89367789889012e-08	73.8319169201089	0.0913298275887657	0.679045945469006	0.902845072073202	73.8319169201089	0.194698793270948	0.366345418124811	0.838813182406136	73.8319169201089	0.7018815209741	0.000973233868185956	0.0046539157836617	73.8319169201089	1.27325966401538	1.18526105380551e-09	1.23052945790869e-08	73.8319169201089	-0.131644436384333	0.557890704840905	NA	73.8319169201089	0.143062719976273
ENSG00000092847.6	AGO1	chr1	36335409	36395211	+	59802	3595	202	139	133.148148148148	FALSE	133.138059192867	0.246392757130219	0.21491146702862	0.379563867879815	133.138059192867	0.333452950266292	0.0926935108217763	0.293115590000458	133.138059192867	-0.220944262007923	0.278329998359967	0.502000526469473	133.138059192867	0.164117478162013	0.416057813040226	0.519514588460749	133.138059192867	0.299598712083364	0.129896817198336	0.598541897061804	133.138059192867	-0.041379441643206	0.835339516948508	0.980002807017739	133.138059192867	0.296163527654568	0.136657071420829	0.248958559076804	133.138059192867	0.797424564798283	5.38397178157292e-05	0.000218941410296432	133.138059192867	0.0532059549531445	0.789708721968869	0.928949489130127	133.138059192867	-0.374832391909498
ENSG00000126070.14	AGO3	chr1	36396319	36538101	+	141782	1991	128	72	73.7407407407407	FALSE	72.6776289214052	0.240723648734369	0.258697251626931	0.424625467238702	72.6776289214052	-0.102812220762107	0.639888488564496	0.810989719952972	72.6776289214052	-0.0861300842717983	0.693983720696025	0.837660417598774	72.6776289214052	0.444704983643255	0.0372964556474343	0.0733919977880661	72.6776289214052	0.404842229935057	0.0539991874076441	0.480197108247337	72.6776289214052	-0.2603344796797	0.230852658797967	0.727748344338654	72.6776289214052	0.162635528447787	0.45083590094903	0.59346974617748	72.6776289214052	0.778917312171284	0.000224134991687887	0.000771930944594133	72.6776289214052	0.164118581200688	0.441199914104735	NA	72.6776289214052	-0.157522258917593
ENSG00000116863.10	ADPRHL2	chr1	36554476	36559533	+	5057	7039	427	261	260.703703703704	FALSE	251.573299623711	0.14174255789248	0.395028156417051	0.558942138562517	251.573299623711	0.273991183235762	0.0992609992938003	0.304388623101309	251.573299623711	-0.247845986307041	0.142891071317054	0.331750413329206	251.573299623711	-0.165043459052841	0.33189926310492	0.435866608985642	251.573299623711	0.292013103450647	0.0780024681522809	0.527198386553656	251.573299623711	0.270508486860676	0.100908287588086	0.519525530091919	251.573299623711	-0.0804551846649094	0.632939063971657	0.749798723431917	251.573299623711	-0.188583517593384	0.272050781221923	0.357902531570887	251.573299623711	0.150270545558166	0.368644050517605	0.715327829185352	251.573299623711	-0.00348269637508546
ENSG00000054116.7	TRAPPC3	chr1	36602173	36615098	-	12925	12846	739	482	475.777777777778	FALSE	464.156322100023	0.133574685541778	0.342095633482608	0.508247943744765	464.156322100023	0.164751590898094	0.241479574937633	0.490402678192099	464.156322100023	-0.14450253001007	0.308041612434931	0.534824580397542	464.156322100023	0.24184092353051	0.0864281258428708	0.147914828279646	464.156322100023	0.203902022258192	0.145925494534911	0.618732991969225	464.156322100023	0.0283411036865699	0.839736154431712	0.980440289108405	464.156322100023	-0.0879011256031658	0.535279894684472	0.668479253984942	464.156322100023	0.0349679693371295	0.806470555091654	0.850074223024438	464.156322100023	0.0703273367164142	0.618439416813794	0.861427367552259	464.156322100023	-0.136410487211524
ENSG00000116871.11	MAP7D1	chr1	36621180	36646450	+	25270	10394	752	371	384.962962962963	FALSE	371.230111069262	0.0184573573893296	0.886431466876701	0.930261837787911	371.230111069262	0.0979383387563202	0.448028889858064	0.676953348046105	371.230111069262	-0.120252299607602	0.355031576499369	0.577772822416442	371.230111069262	0.145740055110731	0.261298329424664	0.359279991168395	371.230111069262	-0.0870253970977675	0.501665271030131	0.83152938178347	371.230111069262	-0.168890204487783	0.190385541392453	0.674972998992304	371.230111069262	-0.54371020826505	4.33586962437865e-05	0.000335086892854447	371.230111069262	-0.109002244039894	0.409668376656894	0.502149701515285	371.230111069262	-0.105482754487097	0.421517359439004	0.751864734124414	371.230111069262	-0.266828543244103
ENSG00000054118.9	THRAP3	chr1	36690017	36770958	+	80941	11045	760	381	409.074074074074	TRUE	390.97303350799	0.0422228617852679	0.696035711835574	0.802587947127946	390.97303350799	-0.138941942043646	0.2038407655549	0.44953792321378	390.97303350799	-0.22079207518313	0.0441066259081692	0.150640822612245	390.97303350799	-0.319901738666371	0.00421794686767723	0.0115128438893806	390.97303350799	0.0797993354293866	0.45854613720552	0.809307829353615	390.97303350799	0.175430265238856	0.0990422770784691	0.514124880472993	390.97303350799	-0.10479703784871	0.337928207052225	0.481469470927418	390.97303350799	-0.396276030529468	0.000493440653148606	0.00155355827086301	390.97303350799	0.0375764736441187	0.731403751096511	0.906443933608343	390.97303350799	0.314372207282502
ENSG00000196182.6	STK40	chr1	36805225	36851497	-	46272	4722	268	182	174.888888888889	FALSE	167.726958563846	0.469479906077598	0.000717310397191342	0.0164745960105797	167.726958563846	0.799863115388218	4.74234102296291e-09	4.7517154180083e-07	167.726958563846	0.177576215105879	0.210090917193923	0.420809640988622	167.726958563846	-0.171169809959624	0.249226589009467	0.346608379195381	167.726958563846	0.355773178550119	0.0106609252696177	0.262471980137988	167.726958563846	0.30407704781272	0.0277052010664853	0.275358382456637	167.726958563846	-0.00328469650347879	0.981853481147804	0.98861863700225	167.726958563846	-0.625822444406378	8.158786574755e-05	0.000316828589070139	167.726958563846	-0.11370672752748	0.413946150139577	0.745741137534691	167.726958563846	-0.495786067575499
ENSG00000181817.5	10	chr1	36856839	36863493	-	6654	3884	258	152	143.851851851852	FALSE	139.499389623255	0.544192307121434	0.00397016315011418	0.0419251174810464	139.499389623255	0.150409459148264	0.433298103431823	0.664956323645952	139.499389623255	-0.509247063809421	0.0101682830003394	0.0521858812471262	139.499389623255	-0.157126385498133	0.424039067760213	0.526779413379454	139.499389623255	0.13825844663157	0.469941635752606	0.816228350580887	139.499389623255	-0.150198647052864	0.434128649290046	0.874533318093896	139.499389623255	-0.665801339217255	0.000922687594716932	0.00443930709306298	139.499389623255	-0.348039718711354	0.0832066922407474	0.132091390390295	139.499389623255	-0.405933860489864	0.0333280675869525	0.460159728229947	139.499389623255	-0.300608106201128
ENSG00000116898.7	MRPS15	chr1	36921319	36930038	-	8719	3121	231	115	115.592592592593	FALSE	110.600362302425	0.191674389161131	0.283571872561564	0.449599233381101	110.600362302425	-0.281921256245193	0.127005906211197	0.34949784729293	110.600362302425	-0.104325278580995	0.566813297247459	0.752230122036248	110.600362302425	-0.195181237365765	0.294280975299115	0.395172068591627	110.600362302425	0.0364420475080494	0.83939570100338	0.960439882558243	110.600362302425	-0.0326720183338527	0.854811272587133	0.983196790636566	110.600362302425	-0.174070028358066	0.343634169063482	0.487178117009248	110.600362302425	-0.653562895494796	0.000889571568189806	0.00260198173899917	110.600362302425	-0.155232341653081	0.393915696698272	0.732715916067157	110.600362302425	0.24924923791134
ENSG00000163874.8	ZC3H12A	chr1	37940153	37949980	+	9827	1082	67	41	40.0740740740741	FALSE	39.1316117059918	0.505353729122713	0.0623792305699276	0.175202682471012	39.1316117059918	0.391821946946139	0.152913807622819	0.38471444081574	39.1316117059918	-0.216811645402406	0.450991212938293	0.664306202032354	39.1316117059918	0.00574145296201256	0.984060340784107	0.989572640510754	39.1316117059918	0.332070133784158	0.224470923688834	0.677243271636226	39.1316117059918	-0.340021006340242	0.231045695356514	0.727941775827085	39.1316117059918	-0.165244619491914	0.56619041725107	0.693414273088753	39.1316117059918	0.574269405622719	0.0384377448193505	0.0686177847748795	39.1316117059918	-0.173283595338556	0.52478238740703	NA	39.1316117059918	-0.731842953286381
ENSG00000163875.11	MEAF6	chr1	37958176	37980375	-	22199	10928	780	379	404.740740740741	FALSE	382.145908930256	-0.818807044517512	0.00204610089849823	0.0296700081542886	382.145908930256	-0.521507255243471	0.0488413694017212	0.200456873730558	382.145908930256	-0.0731727825769769	0.781254536991879	0.888135929453696	382.145908930256	-0.520359817158924	0.0498483920613541	0.0935010000854785	382.145908930256	-0.301833064241017	0.252733020492425	0.693710237689175	382.145908930256	-0.0162232970720401	0.950790777844579	0.99467197405541	382.145908930256	0.211305001953805	0.421820290282673	0.566701814993108	382.145908930256	-0.14662397665423	0.579692592202512	0.65908577213472	382.145908930256	0.516973980276495	0.0527543573215617	0.488669628902345	382.145908930256	0.505283958171431
ENSG00000163877.9	SNIP1	chr1	38000050	38019903	-	19853	1141	87	37	42.2592592592593	FALSE	40.1735068404326	-0.775611083286277	0.0113578862487622	0.0697373720671921	40.1735068404326	-0.689286429150323	0.0239288285111213	0.13450405432507	40.1735068404326	-0.413004855135325	0.164659099382063	0.362420611166117	40.1735068404326	-0.731912927356446	0.0190710518535037	0.0416354836132864	40.1735068404326	-0.186762954702448	0.52059429315528	0.837338580872578	40.1735068404326	0.127986861688951	0.649982153793259	0.941168052014688	40.1735068404326	0.377921911576085	0.182059264253956	0.306287520514709	40.1735068404326	0.304339568038224	0.293745505422837	0.381665413182839	40.1735068404326	0.588848128583829	0.061877260130084	NA	40.1735068404326	0.817273290839274
ENSG00000134697.8	GNL2	chr1	38032417	38061536	-	29119	11264	807	373	417.185185185185	FALSE	393.261853310765	-0.101137881991825	0.529604320423069	0.674789358137748	393.261853310765	-0.570237921666109	0.000467915898379716	0.00981468715121597	393.261853310765	-0.286088768542506	0.0767606156275704	0.219490564200226	393.261853310765	-0.604752114787738	0.000229122578090495	0.000970673183582002	393.261853310765	-0.00798633631914791	0.960304365916704	0.990810202842577	393.261853310765	0.122482005019328	0.442620178694097	0.877130292466514	393.261853310765	-0.282215215413146	0.0812720972560087	0.166347188136586	393.261853310765	-0.70108619347883	2.35719640492834e-05	0.000104646890372321	393.261853310765	0.0931515456726774	0.565286937095516	0.83169675245367	393.261853310765	0.692719926685437
ENSG00000116922.10	C1orf109	chr1	38147242	38157914	-	10672	732	51	27	27.1111111111111	FALSE	26.3834398955576	0.421871130418489	0.217386637728727	0.38268042028773	26.3834398955576	-0.0352927946408268	0.920477472389558	0.96282524636815	26.3834398955576	-0.136518719086825	0.700978014633133	0.841036974671917	26.3834398955576	-0.558070124772489	0.138810528607026	0.216886731642201	26.3834398955576	0.283627954088118	0.409341562599078	0.791042797025323	26.3834398955576	-0.0925975398441391	0.790001834721387	0.976117839087209	26.3834398955576	-0.703254860277361	0.0620939856453843	0.134816672640773	26.3834398955576	0.193724259923615	0.587026640649819	0.665842906736803	26.3834398955576	-0.138243176330371	0.688069970581811	NA	26.3834398955576	-0.0573047452033123
ENSG00000134690.6	CDCA8	chr1	38158090	38175391	+	17301	6190	675	182	229.259259259259	FALSE	206.330294540378	-0.73054106326584	0.00200995483126614	0.0293555606457972	206.330294540378	-0.471957395315319	0.0451674376115235	0.191977392678265	206.330294540378	-1.36103380774895	1.47384958060188e-08	6.64929939060022e-07	206.330294540378	-1.6873753289397	5.50695565516446e-12	1.2930091793066e-10	206.330294540378	-0.388767742254348	0.0980321290682478	0.556475934793829	206.330294540378	-0.439915075219289	0.0606214186162758	0.411869207976307	206.330294540378	-1.58914602732668	5.67219457645457e-11	1.97085889779472e-09	206.330294540378	-2.02542025926172	6.96882044906243e-16	2.02189649190475e-14	206.330294540378	0.341773321011492	0.152119981497158	0.555438393732951	206.330294540378	0.0320423200960306
ENSG00000185090.10	MANEAL	chr1	38259474	38266809	+	7335	1370	119	39	50.7407407407407	FALSE	46.9918740370962	-0.271760484210117	0.340844008526831	0.507084434502737	46.9918740370962	-0.115326661184654	0.684372848071017	0.8391794848408	46.9918740370962	-0.744024539058614	0.0114153455749225	0.0567933214890919	46.9918740370962	-1.23925594112331	7.32028521834036e-05	0.000361690927330498	46.9918740370962	0.0275321341265258	0.921837249864979	0.985301434575932	46.9918740370962	-0.421642331946635	0.137523304928493	0.59192723205236	46.9918740370962	-1.2918380391668	3.0061129808518e-05	0.000243554113564232	46.9918740370962	-1.10562779486776	0.00041375584458372	0.00133483119160536	46.9918740370962	0.299292618336642	0.300781834874209	NA	46.9918740370962	-0.306315670761981
ENSG00000196449.3	YRDC	chr1	38268616	38273857	-	5241	1836	181	53	68	FALSE	62.1790201938677	-1.03214218963092	0.000780343406908941	0.0173063805987885	62.1790201938677	-1.03188291155777	0.000806897496103443	0.0144553757254124	62.1790201938677	-1.14609878300731	0.000212908959341488	0.00250291473757926	62.1790201938677	-1.32272536083781	3.05411627764309e-05	0.000167947159951822	62.1790201938677	-0.385681568479243	0.195882422218991	0.659640552311924	62.1790201938677	0.0276095390256424	0.924921796779548	0.992832397446575	62.1790201938677	-0.72587676847961	0.0169007114633614	0.0480305370064794	62.1790201938677	-0.981133569556627	0.00175348145326658	0.00468228995438431	62.1790201938677	0.646460621151678	0.0390435568656108	NA	62.1790201938677	1.05949245058341
ENSG00000197982.12	C1orf122	chr1	38272651	38275126	+	2475	8785	559	323	325.37037037037	FALSE	316.76375929357	0.0639833492891621	0.600508911337055	0.732534936569406	316.76375929357	0.121401031255656	0.320185285831713	0.568604244462264	316.76375929357	-0.0810378682269373	0.510639648675043	0.7128504139342	316.76375929357	0.277492348323037	0.0232595593519422	0.049257218711154	316.76375929357	-0.0698848924163427	0.568965383043827	0.857597518153613	316.76375929357	-0.325721551318614	0.00812446777720149	0.125463331247572	316.76375929357	-0.256069241508761	0.0402407218505313	0.0960272224275903	316.76375929357	-0.137749936613354	0.275737883123987	0.361869226146725	316.76375929357	-0.133868241705505	0.282682689032249	0.653150694180774	316.76375929357	-0.44712258257427
ENSG00000188786.9	MTF1	chr1	38275239	38325292	-	50053	3043	175	106	112.703703703704	FALSE	113.475973018941	0.377484531396873	0.109404424415927	0.250262257815781	113.475973018941	0.0164497209104913	0.945381139126335	0.974281270915226	113.475973018941	-0.040265310208644	0.867026183207509	0.937410868343677	113.475973018941	0.203631374165675	0.396344669612134	0.50041055209491	113.475973018941	0.315350197243794	0.181401187104183	0.646517416728662	113.475973018941	0.398160091491398	0.0882462147762893	0.493010095370627	113.475973018941	0.725169199327798	0.00190410937884881	0.00816710329394733	113.475973018941	1.28840339696488	2.76419902507608e-08	2.22608439243744e-07	113.475973018941	-0.0621343341530797	0.792839326008767	0.928949489130127	113.475973018941	0.381710370580907
ENSG00000204084.8	INPP5B	chr1	38326369	38412729	-	86360	1902	112	69	70.4444444444444	FALSE	70.6382726024788	0.42206610981585	0.0379170932410304	0.131217507011229	70.6382726024788	0.275559401623329	0.1818489427489	0.422148468289136	70.6382726024788	0.0633841773265713	0.762416396130387	0.878962627082489	70.6382726024788	0.292720110825096	0.162063844204205	0.244786002718253	70.6382726024788	-0.12334419807641	0.560368971047397	0.855290711466779	70.6382726024788	-0.0608417031270178	0.768969985087382	0.972383429907978	70.6382726024788	0.349911708889987	0.0890589217433803	0.178560376992126	70.6382726024788	0.890901928753179	1.05351988524418e-05	5.07266296153235e-05	70.6382726024788	-0.54541030789226	0.0101971529944839	NA	70.6382726024788	-0.336401104750347
ENSG00000183431.7	SF3A3	chr1	38422647	38456593	-	33946	6854	504	232	253.851851851852	FALSE	239.303420617313	0.124713152154215	0.272410934865979	0.438736984280941	239.303420617313	-0.306758379171472	0.00888809996632611	0.0715114448271075	239.303420617313	-0.510376793751041	1.75812206507345e-05	0.000323227549556721	239.303420617313	-0.723739657008256	4.75123609315218e-09	6.60345184107942e-08	239.303420617313	-0.135573185590863	0.238781981903617	0.68444357008255	239.303420617313	-0.0929582277519261	0.412607594579809	0.862536155244303	239.303420617313	-0.453853998518498	0.000135996286631231	0.000881112783384452	239.303420617313	-1.07426343430336	2.14510409756578e-16	6.578064771788e-15	239.303420617313	-0.260286337745078	0.0260143074509805	0.456499461396257	239.303420617313	0.213800151419546
ENSG00000183520.7	UTP11L	chr1	38474930	38490496	+	15566	7510	531	277	278.148148148148	FALSE	264.780678649012	-0.196316330288528	0.208876766212385	0.372494017891581	264.780678649012	-0.106153692738912	0.496179865985793	0.713127223765827	264.780678649012	-0.407093374344673	0.00978685693221588	0.0509040255527489	264.780678649012	-0.600665052355648	0.000182584707145854	0.00079501385622831	264.780678649012	-0.0493765052709381	0.750452459436564	0.929336565802219	264.780678649012	-0.12985560194171	0.401230112760945	0.857277431604529	264.780678649012	-0.418231369224991	0.0081475181818279	0.0267129925742094	264.780678649012	-0.773042858396825	2.32044359406499e-06	1.30602628674448e-05	264.780678649012	0.14693982501759	0.352565130151948	0.705130260303895	264.780678649012	-0.0237019092027977
ENSG00000116954.7	RRAGC	chr1	39303870	39325495	-	21625	15243	792	559	564.555555555556	FALSE	562.049905308376	0.543837040667035	0.00164079311523519	0.0258950810878785	562.049905308376	0.666813356222406	0.000111508907800131	0.00316076400826886	562.049905308376	0.13811669627442	0.426800283184202	0.642822055659958	562.049905308376	0.537290650745414	0.00193147491337592	0.00601420305627645	562.049905308376	0.373492239778145	0.0308821926422808	0.39307511668912	562.049905308376	0.164813486436862	0.340855226293743	0.822500555859195	562.049905308376	0.039465913707743	0.820860024179218	0.883837414513598	562.049905308376	0.589726627530557	0.000684135152347618	0.00206053568954192	562.049905308376	-0.17034480088889	0.324230887547839	0.68550868725033	562.049905308376	-0.501999869785543
ENSG00000214114.4	MYCBP	chr1	39328636	39347289	-	18653	2067	166	77	76.5555555555556	FALSE	72.115623232536	-0.109451499692615	0.597551257214158	0.730253986803656	72.115623232536	-0.000391214179316757	0.998488325826273	0.999223911840887	72.115623232536	-0.44785289019821	0.0353395461318086	0.129172814233718	72.115623232536	-0.355014035682369	0.0985881385690638	0.164958056320315	72.115623232536	0.076907865119158	0.706612902641716	0.913324523971919	72.115623232536	-0.295367268743358	0.152674949762659	0.619105902166979	72.115623232536	-0.955887991049641	2.07052852287707e-05	0.00017630182096474	72.115623232536	-1.46476215506009	3.86312226989903e-09	3.59099510245091e-08	72.115623232536	0.186359364811773	0.37638044274433	NA	72.115623232536	-0.294976054564041
ENSG00000174574.11	AKIRIN1	chr1	39456895	39471731	+	14836	9212	497	335	341.185185185185	FALSE	340.947879715013	0.400036656228389	0.0312573379982072	0.118187229508753	340.947879715013	0.410986678656454	0.0270247520138708	0.143056080134246	340.947879715013	-0.118440582182888	0.528831404336853	0.726755216284016	340.947879715013	0.260393567490071	0.164330939281984	0.247516116726597	340.947879715013	0.298711067198004	0.108209132547305	0.565960594427347	340.947879715013	0.311505219194968	0.0925989672888254	0.503105486209211	340.947879715013	0.235291575284808	0.207581430646993	0.339786594837064	340.947879715013	0.869925250317387	2.76195113779856e-06	1.51687271857299e-05	340.947879715013	-0.101325589030385	0.586147769696136	0.843800099562566	340.947879715013	-0.0994814594614862
ENSG00000168653.6	NDUFS5	chr1	39491990	39500308	+	8318	20729	1052	751	767.740740740741	FALSE	763.845245710159	0.314457508930331	0.128039258320394	0.274661261873745	763.845245710159	0.157621780138498	0.446246625996311	0.675389629387297	763.845245710159	0.284408544713735	0.168842737413177	0.368613597235709	763.845245710159	0.441134171359241	0.0328973252722857	0.066217297797544	763.845245710159	0.0329507522423112	0.873528617553678	0.969000527479409	763.845245710159	0.110756120992609	0.591845269354741	0.932827928306996	763.845245710159	0.354564647579758	0.0862611813607683	0.174200281177816	763.845245710159	0.316917781243441	0.12637364485071	0.187849180210207	763.845245710159	-0.28150675668802	0.174218954606182	0.562638007794361	763.845245710159	-0.0468656591458892
ENSG00000127603.19	MACF1	chr1	39546988	39952849	+	405861	34198	1802	1256	1266.59259259259	FALSE	1264.88350587074	0.180045182501676	0.249637485695954	0.413916916344436	1264.88350587074	0.303132832788693	0.0524424895571147	0.208439544517369	1264.88350587074	0.349281144117705	0.0253523678805066	0.101918366038982	1264.88350587074	0.783501873752413	5.06478108086905e-07	4.4619807661094e-06	1264.88350587074	0.118474241466158	0.448826527298068	0.806485043998494	1264.88350587074	0.0310901518754411	0.842304653674612	0.980440289108405	1264.88350587074	0.209912836118309	0.179733513436465	0.303050261598438	1264.88350587074	0.743884851672196	1.91974344459129e-06	1.0955251166916e-05	1264.88350587074	-0.0615709410355173	0.694461828512169	0.89049848181789	1264.88350587074	-0.272042680913252
ENSG00000090621.9	PABPC4	chr1	40026488	40042462	-	15974	23145	2411	728	857.222222222222	FALSE	787.528425685357	-0.584825956053544	0.0212923335452637	0.0966612249752435	787.528425685357	-0.689011176967111	0.00670927269073701	0.0599728244565154	787.528425685357	-0.754097906397293	0.00301329578707832	0.0210588562832554	787.528425685357	-1.13588036070633	8.55858860183112e-06	5.60260871227384e-05	787.528425685357	-0.385538545802701	0.128607700952901	0.595844826339617	787.528425685357	-0.383818441360813	0.130021851175528	0.577453122709206	787.528425685357	-0.718921954025015	0.00468949427519866	0.0170281579745431	787.528425685357	-0.816010234943585	0.00137237917225554	0.00378788959875913	787.528425685357	0.199287410250843	0.433752258556566	0.758312055132479	787.528425685357	0.305192735606298
ENSG00000084072.12	PPIE	chr1	40157854	40229586	+	71732	1497	101	53	55.4444444444444	FALSE	53.9136624744954	-0.238165157002415	0.291786294221897	0.458713353320929	53.9136624744954	-0.499877672761641	0.0319490730586213	0.157768001459106	53.9136624744954	-0.273910065587819	0.227700638674359	0.445222691957556	53.9136624744954	-0.0200437042158178	0.929388269007008	0.949328913470055	53.9136624744954	-0.0690139223816812	0.755364814685153	0.931717521921266	53.9136624744954	-0.262308053949941	0.236415690527729	0.732803599020663	53.9136624744954	0.178265142883202	0.416881387468647	0.561881731699458	53.9136624744954	-0.130977410571787	0.572575551670448	0.653407963017382	53.9136624744954	0.169151234620734	0.467862279616166	NA	53.9136624744954	0.2375696188117
ENSG00000043514.11	TRIT1	chr1	40306723	40349183	-	42460	2739	229	104	101.444444444444	FALSE	94.0734222050852	-0.842698687218399	0.0359291569917295	0.127934523056915	94.0734222050852	-0.720042454085143	0.0725809421764692	0.255590510312479	94.0734222050852	0.166816897055173	0.672784544104703	0.824727808907584	94.0734222050852	-0.872483306664312	0.0309667966550841	0.0630233554031318	94.0734222050852	-0.422906664857811	0.288017023424091	0.716242143563558	94.0734222050852	-0.027105025934479	0.945244718617618	0.993959434783605	94.0734222050852	0.0821788784689206	0.835489105903929	0.894114459211892	94.0734222050852	-0.259407989743631	0.516957696673169	0.603525873490408	94.0734222050852	0.419792022360589	0.3011149880931	0.671138292889269	94.0734222050852	0.692937428150664
ENSG00000131236.12	CAP1	chr1	40505905	40538321	+	32416	31975	1741	1207	1184.25925925926	FALSE	1159.09422718162	0.0588011969467509	0.59856489657661	0.730928719972289	1159.09422718162	0.224911031166337	0.0436036389444912	0.187756001206312	1159.09422718162	0.38692642075432	0.000498165754097861	0.00489522858207421	1159.09422718162	0.210438382590812	0.0599352036029165	0.109102340513676	1159.09422718162	0.104791825951078	0.347402646918314	0.760351286035941	1159.09422718162	0.24020049753767	0.0303803524395593	0.290054396204583	1159.09422718162	0.38856115352401	0.000477076039255552	0.00252671433943767	1159.09422718162	0.150506320831682	0.180720953689778	0.253462314118623	1159.09422718162	0.045990629004327	0.68189887855094	0.886951357352399	1159.09422718162	0.0152894663713331
ENSG00000131238.12	PPT1	chr1	40538379	40563375	-	24996	4780	276	185	177.037037037037	FALSE	169.910754064699	-0.168370568015177	0.393094700888387	0.557067574224254	169.910754064699	0.0747010244939866	0.702645652749963	0.84924015903683	169.910754064699	0.00676539892125169	0.972461958312565	0.988872397306982	169.910754064699	-0.091624357625895	0.644312503599007	0.725069397292196	169.910754064699	0.0826472490228283	0.671702263915962	0.899246935981995	169.910754064699	0.15719479870415	0.416219148989635	0.8645147781255	169.910754064699	0.237035238507646	0.223746603193295	0.359036215962128	169.910754064699	-0.33283518561409	0.100492127245146	0.155019810324279	169.910754064699	0.251017817038005	0.207199091692496	0.592408370800723	169.910754064699	0.082493774210163
ENSG00000117000.8	RLF	chr1	40627045	40706593	+	79548	16065	1032	525	595	FALSE	611.442043608465	0.474985964679824	0.00826211557753591	0.0596203987743554	611.442043608465	0.899769019380143	4.82210755058e-07	3.17191608880518e-05	611.442043608465	0.872082413001159	1.07078674835389e-06	2.88342794080171e-05	611.442043608465	1.13806300153837	1.87895996498314e-10	3.42304397849043e-09	611.442043608465	0.512196728077351	0.00434642835933205	0.154373460826711	611.442043608465	0.919824138784515	2.39650813113245e-07	2.06507105659683e-05	611.442043608465	1.76121317498925	2.79061917869548e-23	6.1658372981587e-21	611.442043608465	1.86015450090497	1.11610133381243e-25	1.04537447755018e-23	611.442043608465	0.0372107633975265	0.835770819668729	0.948498297282619	611.442043608465	0.0200551194043723
ENSG00000084073.4	ZMPSTE24	chr1	40723779	40759856	+	36077	2473	223	86	91.5925925925926	FALSE	85.406347530254	-0.384321151848744	0.0261554968594003	0.106894161027245	85.406347530254	-0.448568599580024	0.0101834184670607	0.0777996004474586	85.406347530254	-0.671615062908791	0.000160436161916782	0.00196654111982491	85.406347530254	-0.983344587319806	2.02554240710519e-07	1.94150154861239e-06	85.406347530254	-0.26466464208208	0.12012544159687	0.586189664730324	85.406347530254	-0.246650418058388	0.141062514745103	0.596689962652558	85.406347530254	-0.282879101577038	0.101130407474264	0.197431785316512	85.406347530254	-1.19325454829915	1.90337660270366e-09	1.90271417465168e-08	85.406347530254	0.119656509766665	0.505928218287276	0.800955300654797	85.406347530254	0.201918181521636
ENSG00000084070.7	SMAP2	chr1	40810522	40888998	+	78476	4074	223	145	150.888888888889	FALSE	148.581133037517	0.14512882022104	0.408027262721884	0.569342124226925	148.581133037517	0.268148378541853	0.124835071772325	0.345552140527506	148.581133037517	0.322805802494778	0.063575356732969	0.193838617266062	148.581133037517	0.684418710859627	7.46218437930818e-05	0.000368153266084061	148.581133037517	0.0531147170031383	0.762584038859102	0.933957569498301	148.581133037517	0.0470252964313014	0.787078413845478	0.974861497965967	148.581133037517	-0.17014370281311	0.343687567981806	0.487178117009248	148.581133037517	0.136191537541058	0.448670709597774	0.539383346128863	148.581133037517	-0.0920141032179022	0.605966044958861	0.85426106498563	148.581133037517	-0.221123082110552
ENSG00000164002.7	EXO5	chr1	40974413	40982228	+	7815	706	59	25	26.1481481481481	FALSE	24.5985684893678	0.24123264028956	0.456521948168784	0.611986563063226	24.5985684893678	-0.22027631571312	0.512709702536913	0.724384244427051	24.5985684893678	-0.923854289320526	0.0103369698464665	0.0528448648742851	24.5985684893678	-0.512676599453074	0.145609488875551	0.224642109338508	24.5985684893678	0.0115767531623933	0.971836220238881	0.992149447939135	24.5985684893678	0.0445198305664433	0.890368580119918	0.985978923521551	24.5985684893678	-0.689376518094795	0.0511305681539172	0.116042062650189	24.5985684893678	-0.917099211123185	0.0148801378391486	0.0301703211796283	24.5985684893678	-0.229655887127166	0.489017597525909	NA	24.5985684893678	0.264796146279563
ENSG00000117016.5	RIMS3	chr1	41086351	41131329	-	44978	2045	113	72	75.7407407407407	FALSE	77.161115321829	0.867023265393864	0.00019468896290855	0.00780295252736266	77.161115321829	1.23698821054954	6.23905684013221e-08	5.12018598013517e-06	77.161115321829	1.04656659258507	5.64353411587375e-06	0.000120970978797224	77.161115321829	1.55647533534134	7.17168968979436e-12	1.66124865744511e-10	77.161115321829	0.666969376693491	0.00451916086068249	0.158002064531997	77.161115321829	0.632283908885061	0.00655199323805726	0.109628205305513	77.161115321829	0.722582017706892	0.00221829782343743	0.00925669362932705	77.161115321829	1.31838820187485	1.31505906082897e-08	1.12085696608934e-07	77.161115321829	-0.200053888700373	0.38053303693698	0.719907080248553	77.161115321829	-0.604704301664477
ENSG00000066136.15	NFYC	chr1	41157320	41237275	+	79955	4180	345	143	154.814814814815	FALSE	144.122455680019	-0.480973889359728	0.00621204892624916	0.0522746343725479	144.122455680019	-0.155271485138942	0.369737406895786	0.614633525679357	144.122455680019	-0.390656857291503	0.0256411852206235	0.10262428845616	144.122455680019	-0.984372237613491	1.1159631596756e-07	1.13399228147696e-06	144.122455680019	-0.0744626148201282	0.664467397726469	0.89726058345654	144.122455680019	-0.0212236234169759	0.900567198679579	0.987331158318274	144.122455680019	-0.307956750809896	0.0782252820661161	0.161463650822292	144.122455680019	-0.838989190310983	6.24020323167136e-06	3.14087799341776e-05	144.122455680019	0.4065112745396	0.0230165553317503	0.453238659175772	144.122455680019	0.134047861721967
ENSG00000179862.5	CITED4	chr1	41326729	41328018	-	1289	348	40	10	12.8888888888889	FALSE	13.8434413109507	-0.543507721172578	0.32383316010781	0.489730487466785	13.8434413109507	0.269079925437636	0.590286619053666	0.779894513101041	13.8434413109507	0.801335849530221	0.0912043195970673	0.246366025695276	13.8434413109507	2.27250084775936	2.62800290523417e-07	2.45081180026005e-06	13.8434413109507	-1.03259810050462	0.0798251000022302	0.53116053028511	13.8434413109507	-0.261316859082136	0.610616668084068	0.934064794976468	13.8434413109507	0.546940401961322	0.26224581818781	0.402381092472286	13.8434413109507	1.95747056382623	1.42468775481756e-05	6.67202955612115e-05	13.8434413109507	-0.489090379332045	0.446556708530594	NA	13.8434413109507	-0.530396784519773
ENSG00000171793.9	CTPS1	chr1	41445007	41478235	+	33228	6939	499	282	257	FALSE	243.037388411459	0.15969295526808	0.169423559722949	0.325149847245579	243.037388411459	0.0316748723283595	0.787326472857822	0.902179816039342	243.037388411459	-0.440077397099777	0.000278346761538349	0.00309086861362881	243.037388411459	-0.668937708048374	1.0670750371615e-07	1.09074562220885e-06	243.037388411459	0.230000341366747	0.0464231504819015	0.455094752790154	243.037388411459	-0.0583125569858692	0.615337238908052	0.934212023933782	243.037388411459	-1.02002088575082	2.09909470284365e-15	1.4470319243523e-13	243.037388411459	-0.967440794796726	2.43416732918249e-13	4.78886298528893e-12	243.037388411459	0.0703073860986674	0.548486376589062	0.823169762617613	243.037388411459	-0.0899874293142287
ENSG00000010803.12	SCMH1	chr1	41492872	41707826	-	214954	6153	477	240	227.888888888889	FALSE	214.646616760898	-0.236629900444505	0.425075657955921	0.584005642034883	214.646616760898	0.00909729850515967	0.975480937368214	0.98855924230294	214.646616760898	-0.395291788224099	0.183734118380133	0.387763139378302	214.646616760898	-0.400573814337196	0.179321107867432	0.266231906701182	214.646616760898	-0.0921193161133105	0.755674191583009	0.931864095404062	214.646616760898	-0.407260097178549	0.169449251151716	0.647612477702087	214.646616760898	-1.09283429175641	0.000288021219713034	0.00164036936567562	214.646616760898	-0.25632014698905	0.390559959419809	0.483125921665303	214.646616760898	0.144510584331194	0.627713633521711	0.865652282216519	214.646616760898	-0.416357395683709
ENSG00000204060.4	FOXO6	chr1	41827594	41849262	+	21668	648	50	24	24	FALSE	24.807885723792	0.196213660115518	0.59630472718765	0.729155361739177	24.807885723792	0.511937393449391	0.158614868126949	0.392237354923055	24.807885723792	0.0135499752780702	0.971304390632163	0.988200389320262	24.807885723792	0.558408464939736	0.127830650225876	0.202410274347	24.807885723792	0.115312898074136	0.756051910932783	0.931879325236045	24.807885723792	-0.794222309637541	0.0459259713318194	0.363735381402838	24.807885723792	-0.15303767615234	0.690961926971327	0.791547317829291	24.807885723792	1.59580495518603	4.72592826030214e-06	2.45246985863005e-05	24.807885723792	-0.0809007620413825	0.830546701952907	NA	24.807885723792	-1.30615970308693
ENSG00000198815.4	FOXJ3	chr1	42642210	42801548	-	159338	3028	181	112	112.148148148148	FALSE	107.939596964888	-0.0364183163652751	0.856896325572724	0.911139639370701	107.939596964888	-0.0352487961093997	0.861825781681748	0.936134219179582	107.939596964888	0.0113123930047142	0.955257621099209	0.981317069951684	107.939596964888	-0.235054754409221	0.258286741026058	0.356219085694869	107.939596964888	0.0343966003756417	0.863831751514876	0.965894423357962	107.939596964888	0.178178781764381	0.366110580236321	0.838813182406136	107.939596964888	0.612878072258352	0.00178737274635766	0.00770089547768199	107.939596964888	0.3396545591354	0.0930716090801249	0.145439521551483	107.939596964888	0.0708149167409168	0.730430274617003	0.905901860880189	107.939596964888	0.21342757787378
ENSG00000127125.7	PPCS	chr1	42921788	42939056	+	17268	8781	515	315	325.222222222222	FALSE	325.348078802903	0.246922102662158	0.154010626438982	0.305578401450818	325.348078802903	0.00277234116848561	0.987330240840351	0.995104791483323	325.348078802903	0.163134616854817	0.347595328446396	0.571608577332556	325.348078802903	0.615416022033091	0.000364961768600409	0.00144326551630552	325.348078802903	0.0586947330530742	0.735684603561873	0.924777494719394	325.348078802903	0.0646411913015013	0.708612516458315	0.955852854993553	325.348078802903	0.186357867224069	0.283774298298884	0.425859130693397	325.348078802903	0.706882760182555	4.41095962040943e-05	0.000182912603701001	325.348078802903	-0.188227369609083	0.281145381538639	0.653150694180774	325.348078802903	0.0618688501330157
ENSG00000171960.6	PPIH	chr1	43124096	43142429	+	18333	10412	651	436	385.62962962963	FALSE	368.437270709871	0.228830126174144	0.118825603383574	0.262409078512623	368.437270709871	0.29816800452837	0.0420091105842573	0.184313903210053	368.437270709871	-0.241378868768596	0.104853436078245	0.270677668869453	368.437270709871	-0.237924911237929	0.112601830213897	0.183315694493321	368.437270709871	0.375108882454795	0.0102300728012452	0.25551460095168	368.437270709871	0.128075740887759	0.381074322744167	0.844859649739159	368.437270709871	-0.46080025078651	0.002185583145855	0.00916010212443218	368.437270709871	-0.952371986828881	1.26424574576533e-09	1.30623568240525e-08	368.437270709871	0.146278756280651	0.319043790291282	0.681861283175529	368.437270709871	-0.170092263640611
ENSG00000065978.13	YBX1	chr1	43148098	43168020	+	19922	26898	1758	969	996.222222222222	FALSE	954.20038284797	-0.237661219649148	0.201504605557315	0.363979383983165	954.20038284797	-0.318977288588248	0.0868129942649509	0.282720322643568	954.20038284797	-0.0750987545174422	0.686187116681389	0.831431121760906	954.20038284797	-0.26017737254339	0.162961767289045	0.245904390533853	954.20038284797	0.098818069301938	0.594394261840122	0.868295650680603	954.20038284797	0.195884162578342	0.29037022718957	0.78532053774342	954.20038284797	0.0575171551099255	0.756862389074097	0.839907689201737	954.20038284797	-0.408817700079862	0.0289448152707865	0.0535345510170353	954.20038284797	0.336479288951086	0.071028693818819	0.496317242611233	954.20038284797	0.514861451166591
ENSG00000177868.7	CCDC23	chr1	43272723	43282954	-	10231	1018	87	35	37.7037037037037	FALSE	35.5966903583678	-0.854098793150614	0.00549623004210685	0.0491205887409899	35.5966903583678	-0.870179193670859	0.00495135932934771	0.0492677405785095	35.5966903583678	-0.336111930084292	0.252814697669645	0.472984140402408	35.5966903583678	-0.784258274208663	0.0122203137683965	0.0285527233574491	35.5966903583678	-0.399601964468712	0.173658011260872	0.640509132874387	35.5966903583678	0.0148438508277205	0.958006824668238	0.995488007933292	35.5966903583678	0.306893626005556	0.27732707180846	0.418882975946275	35.5966903583678	-0.30316836649438	0.316400482391984	0.40572939005379	35.5966903583678	0.454496828681902	0.156814461250836	NA	35.5966903583678	0.885023044498579
ENSG00000117394.15	SLC2A1	chr1	43391052	43424530	-	33478	8740	616	299	323.703703703704	FALSE	310.662315721984	-0.625935853510381	0.016919662030673	0.0852114130440145	310.662315721984	0.242732082367558	0.347942260419307	0.594412858452254	310.662315721984	0.794409526961812	0.00200372319779211	0.015324775767874	310.662315721984	-0.0561502099036659	0.829285494790327	0.874336609397803	310.662315721984	-0.298923869974297	0.250798574512075	0.693710237689175	310.662315721984	0.582074712099519	0.0235237998985731	0.247502544231995	310.662315721984	0.784832907367238	0.00228362160559394	0.00950167425176389	310.662315721984	0.460741645559445	0.0754189329882778	0.1218153599925	310.662315721984	0.327011983536084	0.216197257786186	0.601193148862243	310.662315721984	0.339342629731961
ENSG00000117395.6	EBNA1BP2	chr1	43629846	43736607	-	106761	12325	1089	454	456.481481481481	FALSE	419.563652874372	-0.0510474065485527	0.651705977081053	0.7720305752691	419.563652874372	-0.436788867355902	0.000143709039081109	0.0038819460494104	419.563652874372	-0.518360175202104	6.76136794606323e-06	0.000141071931213624	419.563652874372	-1.16972910199292	3.75888470308958e-22	3.02713172771242e-20	419.563652874372	-0.0963187924655669	0.394416840094631	0.786692358675061	419.563652874372	-0.193422163387937	0.0862219329559311	0.487836110493275	419.563652874372	-1.49235545105851	3.67251240723477e-34	2.43431072408785e-31	419.563652874372	-2.14582737774477	3.60991176538758e-57	3.8883262102931e-54	419.563652874372	-0.0452713859170142	0.69281112325195	0.889805494835953	419.563652874372	0.243366703967965
ENSG00000117399.9	CDC20	chr1	43824626	43828874	+	4248	10046	949	333	372.074074074074	FALSE	347.590259826764	-0.0302858564674697	0.826929530558874	0.892629443053733	347.590259826764	-0.659053339216417	3.09681671983515e-06	0.000165076097484486	347.590259826764	-1.44789078168354	4.37370921246413e-23	1.34600901013584e-20	347.590259826764	-1.08305736891696	8.39567098552104e-14	2.64034660154141e-12	347.590259826764	-0.0674054478328433	0.626504881433089	0.882122967860936	347.590259826764	-0.602668826511544	1.6072675312028e-05	0.000882154415055703	347.590259826764	-1.63660147340184	3.31137336301928e-28	1.14136417076549e-25	347.590259826764	-1.31191560947883	1.01803807801048e-18	4.25846316418268e-17	347.590259826764	-0.0371195913653736	0.790631991536686	0.928949489130127	347.590259826764	0.0563845127048729
ENSG00000066322.8	ELOVL1	chr1	43829068	43833696	-	4628	8782	540	306	325.259259259259	FALSE	322.426819939044	0.587258973422203	0.0189617192373405	0.0909272988296169	322.426819939044	0.0471818767853625	0.851340021793562	0.931200427493669	322.426819939044	0.126822954092378	0.614011251400244	0.785285313235071	322.426819939044	0.437398696964892	0.0816173103805184	0.141074491302511	322.426819939044	-0.192039969434513	0.446474263874573	0.805969476323827	322.426819939044	-0.426856906973192	0.0907413800561193	0.498990728745105	322.426819939044	-0.345094866593683	0.173013622941605	0.295686761677723	322.426819939044	-0.193376450090877	0.446602291630412	0.537557193320193	322.426819939044	-0.779298942856715	0.00198025330875114	0.194898615124454	322.426819939044	-0.474038783758554
ENSG00000159479.12	MED8	chr1	43849588	43855479	-	5891	7219	427	264	267.37037037037	FALSE	257.47634046102	0.102504711254147	0.500600931155129	0.651613024737726	257.47634046102	0.232163339696983	0.125958354775809	0.347824475204159	257.47634046102	0.012282412136585	0.935960429477485	0.972611024577763	257.47634046102	-0.155053062050889	0.318903064779995	0.421599832649466	257.47634046102	0.256456260935263	0.0896541567554051	0.54829657115779	257.47634046102	0.256046005249516	0.0881268946959481	0.492790039970788	257.47634046102	0.0250949968480699	0.869871619460536	0.919677342788893	257.47634046102	-0.420695326884564	0.0083778551326	0.0184492659539009	257.47634046102	0.153951549681115	0.31398321217039	0.680094911303432	257.47634046102	0.0238826655525334
ENSG00000198198.9	SZT2	chr1	43855553	43918321	+	62768	921	58	33	34.1111111111111	FALSE	35.1713643316057	0.74308975107838	0.0564351973257069	0.165690662812816	35.1713643316057	0.609942652986502	0.11998745742563	0.337225023038699	35.1713643316057	0.125283472615675	0.754675816027032	0.873829818154386	35.1713643316057	0.741177584951995	0.0594141575210133	0.108307974478225	35.1713643316057	0.164298587393265	0.680260138649827	0.902999313573132	35.1713643316057	-0.238948897896657	0.553395484354372	0.920936440456088	35.1713643316057	0.0507292025270898	0.900094759254366	0.938234650140593	35.1713643316057	1.2976401212596	0.000813949901060239	0.00240619796096762	35.1713643316057	-0.578791163685115	0.141886474830339	NA	35.1713643316057	-0.848891550883159
ENSG00000178922.12	HYI	chr1	43916824	43919660	-	2836	1660	96	61	61.4814814814815	FALSE	61.110771982962	0.137337800715695	0.629828500963009	0.757071174139262	61.110771982962	0.183513057713331	0.519586346859783	0.730030254506889	61.110771982962	-0.0959521054634065	0.739534126066041	0.864900979073127	61.110771982962	-0.0315355011040964	0.913703641679287	0.939432559402269	61.110771982962	0.273331501348467	0.333591488957875	0.751518394862748	61.110771982962	-0.201982404685496	0.48043294371127	0.894890958739291	61.110771982962	0.177107317289826	0.535100920927411	0.668352606991086	61.110771982962	0.235765028834989	0.415269511279665	0.507715292096605	61.110771982962	0.135993700632772	0.634891246513852	NA	61.110771982962	-0.385495462398827
ENSG00000142949.12	PTPRF	chr1	43990858	44089343	+	98485	20649	1295	787	764.777777777778	FALSE	735.832048637759	-0.631663868181056	0.0338590311751156	0.124313281481027	735.832048637759	0.0296522727401833	0.920413238693448	0.96282524636815	735.832048637759	0.433424461024496	0.14356509658119	0.332553880978524	735.832048637759	0.479755498435894	0.105632290784346	0.174742455305952	735.832048637759	-0.165989673639151	0.576139568118123	0.859561953374511	735.832048637759	0.164781458896618	0.578163764267291	0.929897910108182	735.832048637759	0.360825208723992	0.223554299665719	0.358861289161606	735.832048637759	0.273641330384875	0.356801047123366	0.448316509632845	735.832048637759	0.465674194541905	0.118535302906378	0.530161071357132	735.832048637759	0.135129186156435
ENSG00000066135.8	KDM4A	chr1	44115829	44171186	+	55357	7141	418	277	264.481481481481	FALSE	256.900577476922	-0.0461002223522205	0.740210675974514	0.834759245500901	256.900577476922	0.25267196005113	0.0657867429804591	0.240613057836425	256.900577476922	-0.0462687636478153	0.739570837083859	0.864900979073127	256.900577476922	0.00250225710942667	0.985786518771567	0.990499350775955	256.900577476922	0.0756006657484426	0.583437230554007	0.862198356316906	256.900577476922	0.0205586682197349	0.88068963351755	0.98474254093816	256.900577476922	0.366666472828533	0.00738204252696192	0.0246077603306889	256.900577476922	0.147976842985647	0.292775454077786	0.380749485026906	256.900577476922	0.121700888100663	0.387808998293339	0.72649067516564	256.900577476922	-0.232113291831395
ENSG00000117408.6	IPO13	chr1	44412611	44433694	+	21083	1251	93	48	46.3333333333333	FALSE	44.6111309823882	0.120033521021175	0.651305472686395	0.771768324826549	44.6111309823882	0.105882516928032	0.691301022380592	0.842846092116181	44.6111309823882	-0.264426495891787	0.333389934462895	0.558588579674658	44.6111309823882	-0.454800789099309	0.108400758840028	0.17815932460891	44.6111309823882	0.301372551559894	0.249951111445703	0.693441315945789	44.6111309823882	-0.0433134649179858	0.86979870375708	0.983804164608692	44.6111309823882	-0.710580463576215	0.013103528654457	0.0393781573144214	44.6111309823882	-0.603819441065834	0.0388338598163602	0.0691672943442695	44.6111309823882	0.181339030538719	0.497010674061194	NA	44.6111309823882	-0.149195981846018
ENSG00000132768.9	DPH2	chr1	44435672	44439041	+	3369	1952	154	77	72.2962962962963	FALSE	68.2514998232764	0.346813810073157	0.127241949464766	0.273822947877055	68.2514998232764	0.0138440116908816	0.952307510247273	0.977789707562335	68.2514998232764	-0.812479811209364	0.000867675876149632	0.00773191626140783	68.2514998232764	-0.949230531991113	0.00016228169050602	0.000715650627988931	68.2514998232764	0.111807879561351	0.625828491388813	0.881746911428614	68.2514998232764	-0.375054433589613	0.106985511745731	0.531964313163857	68.2514998232764	-1.40717798485269	6.26749218517606e-08	1.08665956055658e-06	68.2514998232764	-1.28457399586454	1.28687132754764e-06	7.62128538108453e-06	68.2514998232764	-0.235005930511806	0.307330058510479	NA	68.2514998232764	-0.388898445280495
ENSG00000117410.9	ATP6V0B	chr1	44440159	44443967	+	3808	20056	1263	769	742.814814814815	FALSE	707.482681384548	0.136490661002173	0.267410239560936	0.433949912296909	707.482681384548	0.0876840865355627	0.477015951604336	0.697040267080645	707.482681384548	-0.128781333377461	0.298314610608147	0.524179649186461	707.482681384548	-0.356496610796491	0.00443288455423365	0.0120195614234837	707.482681384548	0.310429391851625	0.0113412144360479	0.266725033872293	707.482681384548	0.152453469383232	0.213346832506682	0.703399205511676	707.482681384548	-0.410832386740194	0.00100724153232149	0.00480055325443267	707.482681384548	-0.758384371078925	3.11809405209436e-09	2.97548354893656e-08	707.482681384548	0.173938730849451	0.158183901584726	0.557178725928149	707.482681384548	0.0647693828476695
ENSG00000117411.12	B4GALT2	chr1	44444615	44456840	+	12225	36741	1971	1326	1360.77777777778	FALSE	1353.67344596033	0.386048319966121	0.0303942246130212	0.116652261740098	1353.67344596033	0.524711874260265	0.00324130582442819	0.0381038731131455	1353.67344596033	0.147619111882031	0.408467539518874	0.627632808137328	1353.67344596033	0.545577896461898	0.00222568378981324	0.00678652413900236	1353.67344596033	0.405745232344005	0.0228453329878588	0.344560243541858	1353.67344596033	0.0868607641476642	0.626289980654439	0.934540299019156	1353.67344596033	-0.0225832539589304	0.899527270067513	0.937950930078867	1353.67344596033	0.465913452935616	0.00912325824479935	0.0198472901528493	1353.67344596033	0.0196969123778838	0.912045830843202	0.971225074646088	1353.67344596033	-0.437851110112601
ENSG00000178028.9	DMAP1	chr1	44679127	44686353	+	7226	2517	165	93	93.2222222222222	FALSE	89.826010273511	-0.083956821505095	0.622671432856287	0.750427935233934	89.826010273511	-0.104435351093181	0.542949266851547	0.744761832610599	89.826010273511	-0.170953562209517	0.321040319436903	0.546717111078915	89.826010273511	-0.44552378134445	0.014085293355377	0.0322696724256209	89.826010273511	0.104813719133542	0.530644636263381	0.844148557017629	89.826010273511	-0.0864468713834603	0.605051422106632	0.933439890287506	89.826010273511	-0.127103169208271	0.461597813143535	0.603030375357465	89.826010273511	-0.120036489863674	0.499563620522585	0.586956601860256	89.826010273511	0.188770540638637	0.278059135295614	0.651048309268947	89.826010273511	0.0179884797097205
ENSG00000117419.10	ERI3	chr1	44686742	44820932	-	134190	650	41	24	24.0740740740741	FALSE	23.7955195057969	0.589939633819475	0.126348463360139	0.272882188112399	23.7955195057969	-0.430889623489745	0.294760947757209	0.545757431633836	23.7955195057969	-0.0835875538829659	0.834628180874291	0.917111838127233	23.7955195057969	-0.000246789038034051	0.999512396182806	0.999571094790956	23.7955195057969	-0.15418133708955	0.700178034035933	0.910157507812285	23.7955195057969	-0.115496138010237	0.769874725851964	0.972460567320456	23.7955195057969	-0.720005711704393	0.0887391765469271	0.178119143793355	23.7955195057969	-0.0860463159476058	0.83426862475178	0.872191736880058	23.7955195057969	-0.744120970909024	0.0615503572534677	NA	23.7955195057969	0.315393485479509
ENSG00000187147.13	RNF220	chr1	44870866	45117396	+	246530	21255	1165	762	787.222222222222	FALSE	779.192162405384	0.216956475819359	0.172305606109264	0.3289956587289	779.192162405384	0.0189615873739511	0.905341268110045	0.955675188586341	779.192162405384	-0.0229486739736251	0.885589484975817	0.946101761949865	779.192162405384	0.205908336235408	0.196572517025717	0.286416195334901	779.192162405384	0.177199049441693	0.26498302974453	0.699772837054432	779.192162405384	0.0392827569928046	0.804676655203052	0.976230426249868	779.192162405384	0.238294768423004	0.134143330002654	0.245492731323501	779.192162405384	0.3953966055895	0.0131516837398349	0.027183511342326	779.192162405384	-0.0397574263776662	0.802973197876042	0.929478584663623	779.192162405384	0.0203211696188534
ENSG00000126106.9	TMEM53	chr1	45100910	45140227	-	39317	1210	70	42	44.8148148148148	FALSE	45.8494030896078	0.644308285129472	0.0253329588541249	0.105201979010118	45.8494030896078	0.623016359035904	0.0314558183266309	0.156679067352935	45.8494030896078	0.92543423444633	0.00107195134007564	0.00925551572888955	45.8494030896078	1.33436382993252	1.8137711081868e-06	1.41058354144817e-05	45.8494030896078	0.497458846673282	0.0864169690566716	0.541324008400783	45.8494030896078	0.650035176784696	0.0216790757201836	0.234979365384682	45.8494030896078	1.37671236751981	6.4965474076869e-07	8.71974283676605e-06	45.8494030896078	1.35684146882978	1.48670034308545e-06	8.67946941488303e-06	45.8494030896078	-0.14684943845619	0.607452810497607	NA	45.8494030896078	0.0270188177487923
ENSG00000142945.8	KIF2C	chr1	45205490	45233439	+	27949	6456	666	193	239.111111111111	FALSE	217.31583167404	-0.96368746408935	0.000100533968122434	0.00495029259034864	217.31583167404	-0.659052370403928	0.00752394759471197	0.0647690873362967	217.31583167404	-0.88717064945102	0.000337920683290585	0.00359045934391489	217.31583167404	-1.34305085141759	9.40060913123622e-08	9.73618376007963e-07	217.31583167404	-0.512604732164406	0.0369295409709736	0.422160490001597	217.31583167404	-0.464371942401151	0.0578650561865098	0.40554272219998	217.31583167404	-1.01131739070936	4.69957244002784e-05	0.00035774042151696	217.31583167404	-1.81918410439616	1.71428778804413e-12	2.86521909614674e-11	217.31583167404	0.451082731924944	0.0714189988485903	0.496317242611233	217.31583167404	0.194680428002777
ENSG00000142937.7	RPS8	chr1	45240923	45244451	+	3528	401817	22640	14294	14882.1111111111	FALSE	14591.8420637435	0.189531871863533	0.128312578443402	0.274837059022321	14591.8420637435	0.0183159761947276	0.88318721687885	0.947366763829695	14591.8420637435	0.052837961588982	0.671643641234289	0.82398857635941	14591.8420637435	0.184996876680965	0.137807689197835	0.215671786744958	14591.8420637435	0.144604965901801	0.245932158249026	0.692115069431098	14591.8420637435	0.119532254563061	0.337418592233587	0.81856306567478	14591.8420637435	0.497997691259652	6.42160631116805e-05	0.000466961869901562	14591.8420637435	0.230007981408494	0.0650805924518181	0.107494626252121	14591.8420637435	-0.0449269059617313	0.718547612202269	0.902786903459592	14591.8420637435	0.101216278368333
ENSG00000070785.12	EIF2B3	chr1	45316450	45452282	-	135832	3264	232	120	120.888888888889	FALSE	114.988984691827	0.295590800127095	0.10585421867115	0.244739952318031	114.988984691827	-0.0698649133557602	0.707748330423788	0.85298797734698	114.988984691827	-0.409053862767985	0.0311220856975581	0.118036537172473	114.988984691827	-0.474731614219954	0.0141080412593762	0.0323064022142026	114.988984691827	0.182700322054541	0.318922332108793	0.739643014119364	114.988984691827	-0.365277193138998	0.0500439845348389	0.379269142248643	114.988984691827	-1.12512123519726	2.48427819927756e-08	4.82140208179612e-07	114.988984691827	-1.60497876382364	3.49330102149922e-13	6.64498342213217e-12	114.988984691827	-0.112890478072554	0.540387841187095	0.81779762316148	114.988984691827	-0.295412279783238
ENSG00000126088.8	UROD	chr1	45477819	45481247	+	3428	4549	258	158	168.481481481481	FALSE	163.930780488132	0.178583516235815	0.346930591277317	0.512954856732436	163.930780488132	0.0747684258194495	0.695432561119528	0.844972134682314	163.930780488132	-0.13192041853245	0.493073367412714	0.698561954508865	163.930780488132	-0.0142255485276353	0.941334061395193	0.95744518496723	163.930780488132	0.270646649154305	0.152065018502804	0.622781024119226	163.930780488132	0.144979930267197	0.441815304645801	0.877130292466514	163.930780488132	0.00783270368014286	0.967427285275498	0.979800519549654	163.930780488132	-0.148080165127535	0.450883653774362	0.541500271020722	163.930780488132	0.0920631329184896	0.629216137065329	0.866202684969399	163.930780488132	0.0702115044477477
ENSG00000132773.7	TOE1	chr1	45805342	45809647	+	4305	1453	132	57	53.8148148148148	FALSE	49.8052308985442	-0.111915161902832	0.57590864789723	0.71330493951635	49.8052308985442	-0.158714260829494	0.431362388109213	0.663403479981632	49.8052308985442	-1.24074533647081	5.13284375964622e-08	2.01962167474299e-06	49.8052308985442	-1.78125139544539	5.44506766674569e-12	1.28197125913518e-10	49.8052308985442	-0.22661537971697	0.259770632592024	0.697986760538034	49.8052308985442	-0.354250116742793	0.0765326092166954	0.462469490617296	49.8052308985442	-1.24795095822649	6.02996589087236e-08	1.05395975824842e-06	49.8052308985442	-1.69633651999865	7.31499285323183e-11	9.25599022265766e-10	49.8052308985442	-0.114700217814138	0.582843727254962	NA	49.8052308985442	-0.195535855913299
ENSG00000117450.9	PRDX1	chr1	45976708	45988719	-	12011	156612	8390	5714	5800.44444444444	FALSE	5744.16888629214	0.460145721896209	0.0281590349835744	0.111510296164274	5744.16888629214	0.307780282870497	0.142111103073528	0.369069130555934	5744.16888629214	0.107340130628926	0.608737155910068	0.781276150205102	5744.16888629214	0.195273777648622	0.351807798025829	0.456486642913502	5744.16888629214	0.218444124781505	0.297470127812979	0.724710232220649	5744.16888629214	0.0916426153082736	0.66202241079012	0.945230460504821	5744.16888629214	0.244033085540924	0.244497222217294	0.382921222073141	5744.16888629214	0.199173612947255	0.342387002164126	0.433364982028243	5744.16888629214	-0.241701597114703	0.248984263409958	0.625910390492142	5744.16888629214	-0.216137667562224
ENSG00000117448.9	AKR1A1	chr1	46016215	46035721	+	19506	4366	229	165	161.703703703704	FALSE	160.037038107869	0.450619538415703	0.0250848426117436	0.104910858479105	160.037038107869	0.301975773188998	0.135725109317693	0.360858767969937	160.037038107869	-0.0247226754293445	0.903854407419037	0.95517702093817	160.037038107869	0.349832045750831	0.0854215990132191	0.146570672779154	160.037038107869	0.265657315185345	0.188575930453513	0.652610010234527	160.037038107869	-0.145319555040758	0.475231552440278	0.891230222108813	160.037038107869	-0.337859058675604	0.104624406595181	0.202627791171114	160.037038107869	0.178617736468888	0.386555313044806	0.478721921889493	160.037038107869	-0.184962223230358	0.359899039079145	0.710286798683968	160.037038107869	-0.447295328229756
ENSG00000132780.12	NASP	chr1	46049518	46084566	+	35048	50790	3259	1896	1881.11111111111	FALSE	1785.01760319835	0.0235158717546281	0.850070307999199	0.906341975257251	1785.01760319835	0.13244581714683	0.286819743074599	0.538341478125424	1785.01760319835	-0.273409682645728	0.0283891097604001	0.110541779848788	1785.01760319835	-0.547150712777159	1.28218029712637e-05	7.87494484699778e-05	1785.01760319835	0.115952103901083	0.350860296008519	0.760769585415845	1785.01760319835	0.0548160365937505	0.658884260449892	0.943689793960024	1785.01760319835	-0.537087623856935	1.77706204643123e-05	0.000154832595086936	1785.01760319835	-0.936979792736337	1.32316436778248e-13	2.78770351031335e-12	1785.01760319835	0.0924362321464545	0.458267312980502	0.772732078695707	1785.01760319835	-0.07762978055308
ENSG00000159592.6	GPBP1L1	chr1	46092976	46153785	-	60809	18984	1266	707	703.111111111111	FALSE	684.210959479719	-0.398828933769968	1.63208570475165e-07	2.5113718781866e-05	684.210959479719	-0.539229694091408	3.07186546555488e-12	5.09043552243969e-10	684.210959479719	-0.281756195973271	0.000193875173118916	0.00232030884273014	684.210959479719	0.00364871248536312	0.961305441939482	0.971763664752958	684.210959479719	-0.0583678186139914	0.431054521857421	0.798679544153384	684.210959479719	0.0156521350155643	0.830220108401546	0.979148831246428	684.210959479719	0.271362329710982	0.000213219649219055	0.00128483476735706	684.210959479719	0.367131117115513	7.59477271435132e-07	4.71839628547695e-06	684.210959479719	0.340461115155976	1.23548746559964e-05	0.00866385585251747	684.210959479719	0.554881829106972
ENSG00000159596.6	TMEM69	chr1	46152886	46160115	+	7229	2821	210	98	104.481481481481	FALSE	102.33373630088	-0.0132789582381005	0.943183512084108	0.965021648495459	102.33373630088	0.111381026497653	0.5479848918423	0.74810821733655	102.33373630088	-0.289900161646263	0.127651915611962	0.308203013961412	102.33373630088	-0.00675636014073699	0.971524874812886	0.979367085430818	102.33373630088	-0.0688088799688234	0.711983162736344	0.915968783711418	102.33373630088	-0.252932205925501	0.174468537681547	0.65542354202439	102.33373630088	-0.134666345334245	0.476153817178004	0.615052832052595	102.33373630088	0.1689953790468	0.37144522054375	0.46342385814377	102.33373630088	-0.0555299217307229	0.771449100637541	0.925751400960177	102.33373630088	-0.364313232423154
ENSG00000197429.6	IPP	chr1	46159996	46216322	-	56326	1034	85	38	38.2962962962963	FALSE	37.2395824193898	-0.0193922911734123	0.944509139852952	0.965961829570541	37.2395824193898	-0.530259472731961	0.0695214458722202	0.249140470512864	37.2395824193898	-0.581255240965768	0.0471215395303387	0.158155877780335	37.2395824193898	-0.214981511368029	0.456250350809619	0.557186688339922	37.2395824193898	-0.229176869707032	0.416304617563923	0.794906210157855	37.2395824193898	-0.199688410318601	0.471469941172794	0.889957608562096	37.2395824193898	-0.451296753674277	0.12091412262732	0.226651510698198	37.2395824193898	0.265153429244958	0.345118736995229	0.435773986939882	37.2395824193898	-0.20978457853362	0.469323840733179	NA	37.2395824193898	0.33057106241336
ENSG00000086015.16	MAST2	chr1	46252659	46501796	+	249137	4507	247	172	166.925925925926	FALSE	165.170678029421	0.444404469714288	0.00580603764993962	0.050484991351695	165.170678029421	0.479266947049185	0.00294757641283361	0.0359762973787354	165.170678029421	0.306415797483102	0.0592031400203978	0.184303994781708	165.170678029421	0.964222439176615	1.33814345426107e-09	2.07761840457075e-08	165.170678029421	0.225952424408745	0.164413779034911	0.633789538613124	165.170678029421	-0.0838790782243371	0.608031242090239	0.933586150557006	165.170678029421	-0.71764475051842	4.52955139717154e-05	0.00034806316416587	165.170678029421	0.0855985154804989	0.611805106192182	0.687522769960619	165.170678029421	-0.218452045305543	0.17899037615846	0.564891888996106	165.170678029421	-0.563146025273522
ENSG00000117461.10	PIK3R3	chr1	46505812	46642160	-	136348	19532	1094	725	723.407407407407	FALSE	725.346130129781	0.702441732256893	0.00153004833265139	0.0248534084344418	725.346130129781	0.909420290959992	4.01140914245359e-05	0.00138820532451898	725.346130129781	0.64793784339686	0.00348389522869299	0.023527214095335	725.346130129781	0.362835653432762	0.103271801507124	0.171463027666066	725.346130129781	0.678302884726264	0.00221144223803365	0.104131135328612	725.346130129781	0.629760244216721	0.00445405124152386	0.0834359990178503	725.346130129781	1.31711691224166	2.52713567215145e-09	6.31197915563159e-08	725.346130129781	0.757681295443457	0.000653521436691573	0.00197315845128637	725.346130129781	-0.0241388475306292	0.913110376078269	0.971253624301487	725.346130129781	-0.279660046743271
ENSG00000085998.9	POMGNT1	chr1	46654354	46685977	-	31623	2394	148	83	88.6666666666667	FALSE	86.5995554370598	-0.237271863671006	0.234464230322485	0.398653960672623	86.5995554370598	-0.349770227820384	0.0840934520262591	0.276683190572843	86.5995554370598	0.153222689746281	0.429082502343635	0.64515859757374	86.5995554370598	0.221718964284865	0.257607324134598	0.355509659203688	86.5995554370598	-0.153687438914724	0.435895740608312	0.801077173284707	86.5995554370598	0.0443336113406662	0.817113674002799	0.977536013489288	86.5995554370598	0.554048559411294	0.00346766103849449	0.013250924686788	86.5995554370598	0.479274181522255	0.0136992599765311	0.0280528809928157	86.5995554370598	0.0835844247562817	0.685955215807086	0.88797553352451	86.5995554370598	0.39410383916105
ENSG00000085999.7	RAD54L	chr1	46713360	46744145	+	30785	1138	131	30	42.1481481481481	FALSE	36.3528146300396	-1.53984921590228	0.0518130413534183	0.157950502945606	36.3528146300396	-0.875741357070609	0.264695273134112	0.518146108268207	36.3528146300396	-0.631520423279043	0.419949535158043	0.637670266234157	36.3528146300396	-3.65949234444209	2.40976552572292e-05	0.000137062373169336	36.3528146300396	-0.252519011099223	0.746223508233565	0.927713574150062	36.3528146300396	-0.124838233040456	0.872630292343999	0.983933086068857	36.3528146300396	-1.09750704499416	0.163483331551101	0.284248560931364	36.3528146300396	-3.02292399358824	0.000329435182666378	0.00109224431282654	36.3528146300396	1.28733020480306	0.105215855969785	NA	36.3528146300396	0.750903124030153
ENSG00000132128.12	LRRC41	chr1	46726868	46769280	-	42412	6345	466	234	235	FALSE	220.299403747112	-0.773620258453361	0.0577361243491117	0.167297409622615	220.299403747112	-0.453488459475873	0.264809172395438	0.518251337390754	220.299403747112	0.126222358535334	0.755334028365353	0.874122122270246	220.299403747112	-0.569661924446497	0.162416604593398	0.245146940231444	220.299403747112	-0.561205318364059	0.167680256889443	0.638413575953753	220.299403747112	-0.0647279411380111	0.872991247328054	0.983933086068857	220.299403747112	0.367559580137295	0.363747649315263	0.50898482663158	220.299403747112	-0.24243456618556	0.551668133709473	0.634083541173073	220.299403747112	0.212414940089303	0.604396214525394	0.852996921632065	220.299403747112	0.388760518337862
ENSG00000173660.7	UQCRH	chr1	46769303	46782448	+	13145	70388	3972	2531	2606.96296296296	FALSE	2575.48693509149	0.0757341608889493	0.64323864122682	0.765684123698233	2575.48693509149	0.0581073163140669	0.722376600479233	0.862173147121168	2575.48693509149	0.235570506975963	0.149471408595728	0.341010094749639	2575.48693509149	0.225770301512483	0.167485797964963	0.251497159335039	2575.48693509149	-0.0535145728790944	0.743542569569213	0.926667308974066	2575.48693509149	0.102671552460606	0.529680839360354	0.915628670448713	2575.48693509149	0.571038929372458	0.000470457958131233	0.00250088601185492	2575.48693509149	0.331889627057156	0.0425237630033301	0.0747048452191021	2575.48693509149	-0.129248733768044	0.429979688467374	0.75475158082039	2575.48693509149	0.044564236146539
ENSG00000117481.6	NSUN4	chr1	46805849	46830824	+	24975	1396	77	53	51.7037037037037	FALSE	51.5168274959455	0.246115894801366	0.338384998082764	0.504911433502888	51.5168274959455	0.195060323524921	0.450883206353924	0.67924136173982	51.5168274959455	-0.178038340054089	0.502282084205979	0.705717384575725	51.5168274959455	0.170178018206417	0.51692860853156	0.612874768810739	51.5168274959455	-0.0226979883555595	0.930657562071044	0.987132234835438	51.5168274959455	-0.357518027106149	0.17500511175804	0.65627391680287	51.5168274959455	0.109125864625636	0.675790126997114	0.781436613958963	51.5168274959455	0.508408086366709	0.0499395682697939	0.0856717618516453	51.5168274959455	-0.268813883156925	0.308376438497463	NA	51.5168274959455	-0.55257835063107
ENSG00000079277.15	MKNK1	chr1	47023090	47082515	-	59425	1714	93	68	63.4814814814815	FALSE	61.3346575266113	0.275327167497025	0.225694869219384	0.390556680660356	61.3346575266113	0.230626391305744	0.313256190039683	0.562739496726333	61.3346575266113	-0.158921481936399	0.499369889499183	0.703001198793409	61.3346575266113	-0.28106081615611	0.247007812767163	0.34426382858374	61.3346575266113	0.213926016633108	0.346835642322348	0.760285609232174	61.3346575266113	0.320189085914745	0.151410998284995	0.6170234617239	61.3346575266113	0.228720332457653	0.318632833358051	0.460908778650275	61.3346575266113	0.139417925135589	0.555848797459753	0.637782834581982	61.3346575266113	-0.0614011508639176	0.789451706713895	NA	61.3346575266113	0.0895626946090012
ENSG00000142961.10	MOB3C	chr1	47073387	47082563	-	9176	3286	167	119	121.703703703704	FALSE	121.977027174763	0.727645871257871	0.000534989858152639	0.0140549012429917	121.977027174763	0.905562962093709	1.47990241591164e-05	0.000644056521106596	121.977027174763	0.430775973498841	0.0433356132030621	0.14871484626475	121.977027174763	0.964939680424331	4.37366630073611e-06	3.08411477196751e-05	121.977027174763	0.453844742159279	0.0325101376585873	0.39849197184075	121.977027174763	0.499238203063033	0.0174454592140216	0.207348306272034	121.977027174763	0.442356953579437	0.0385166497978531	0.0927934407355323	121.977027174763	0.954746646260823	6.54934855683694e-06	3.27543450460034e-05	121.977027174763	-0.273801129098593	0.191487909441693	0.578174816064789	121.977027174763	-0.406324759030676
ENSG00000123472.8	ATPAF1	chr1	47098409	47139539	-	41130	4524	287	160	167.555555555556	FALSE	162.880516289868	-0.135312038398968	0.339348820738854	0.506001744736218	162.880516289868	0.234331593005493	0.0903497412927293	0.288991730036915	162.880516289868	-0.208202930171017	0.144470005043713	0.333614051374569	162.880516289868	-0.127761675789545	0.375899543747486	0.480653860880263	162.880516289868	0.0435913657389422	0.754206624722734	0.931138370286994	162.880516289868	-0.0164118851774758	0.905330736660643	0.98987881713041	162.880516289868	-0.0760376250657115	0.592058229057561	0.715735937119669	162.880516289868	-0.0418574729967709	0.773097451658619	0.823175944398003	162.880516289868	0.17890340413791	0.215943173226679	0.601193148862243	162.880516289868	-0.250743478182969
ENSG00000159658.6	EFCAB14	chr1	47124366	47184824	-	60458	7507	499	268	278.037037037037	FALSE	265.783668539784	-0.351663991437423	0.148265657182006	0.299907316417217	265.783668539784	-0.0563428061324057	0.815988612538545	0.91721548059544	265.783668539784	0.140908373675298	0.559175548184042	0.747504762442117	265.783668539784	-0.019097805405392	0.937298383321534	0.954918440421099	265.783668539784	-0.0426478046847711	0.859949137535695	0.965759580659997	265.783668539784	0.194142678117927	0.418982931926968	0.865175155622977	265.783668539784	0.538511550074654	0.0249454455449118	0.0654950957527437	265.783668539784	0.154794018395104	0.523858362496529	0.609106397197759	265.783668539784	0.309016186752652	0.20672819061254	0.592078418314803	265.783668539784	0.250485484250333
ENSG00000123473.11	STIL	chr1	47715811	47779819	-	64008	7353	726	233	272.333333333333	TRUE	242.574379769198	-1.2528735686862	0.0349076374956148	0.126015547674785	242.574379769198	-0.462593635461404	0.434979128380146	0.666349359866972	242.574379769198	-0.798542410489874	0.178134390820033	0.380210561224015	242.574379769198	-2.08745338973602	0.000479020821199926	0.00181918132052876	242.574379769198	-0.431138062730037	0.466731306996799	0.814257301655043	242.574379769198	0.0195648059592136	0.973621205408896	0.998113186536832	242.574379769198	-0.788651095452362	0.183637757185694	0.308401199311855	242.574379769198	-2.14979234594841	0.000333231744677529	0.00110313405450875	242.574379769198	0.821735505956162	0.167105390554325	0.559013713256887	242.574379769198	0.482158441420618
ENSG00000162368.9	CMPK1	chr1	47799469	47844511	+	45042	4725	379	196	175	FALSE	160.855288814814	-1.1846566709792	0.00231983242905958	0.0312832488907769	160.855288814814	-0.580337661657985	0.132541082933809	0.357178870007548	160.855288814814	-0.0821905280949814	0.830431352201631	0.914870825632257	160.855288814814	-1.17175566079137	0.00269562817197941	0.00793042948376463	160.855288814814	-0.521938796813659	0.175419614969051	0.642956538574358	160.855288814814	0.163415283358031	0.669142775651385	0.945819984273231	160.855288814814	0.139360705211906	0.716178116131424	0.810095409123718	160.855288814814	-0.797727105095565	0.040391676850751	0.0715279653561284	160.855288814814	0.662717874165544	0.0907043672698406	0.514841601531612	160.855288814814	0.743752945016016
ENSG00000186564.5	FOXD2	chr1	47901689	47906363	+	4674	1139	64	40	42.1851851851852	FALSE	42.0517888098942	0.490049603892662	0.0433714237528582	0.142482485123286	42.0517888098942	0.22395075632929	0.370045931260468	0.614658010176989	42.0517888098942	0.210679405236431	0.398313442608552	0.618999304782554	42.0517888098942	0.959094037779773	5.54733438505459e-05	0.000281790227057502	42.0517888098942	0.124987892178999	0.616607935048415	0.877989390822396	42.0517888098942	0.0999554825114736	0.684185837786117	0.949835566973251	42.0517888098942	0.187827525807512	0.455627733351104	0.597132194416193	42.0517888098942	0.494663551178029	0.04905605134274	0.084408145850717	42.0517888098942	-0.365061711713662	0.142633378903949	NA	42.0517888098942	-0.123995273817816
ENSG00000185104.15	FAF1	chr1	50905150	51425935	-	520785	7579	488	263	280.703703703704	FALSE	271.117827169182	0.228377426929711	0.100878133734915	0.237374898523692	271.117827169182	-0.188975167556436	0.183391549434269	0.423122467391113	271.117827169182	-0.073194473277046	0.603900727660009	0.778797063503551	271.117827169182	0.130141703537488	0.356468376416144	0.461283676164276	271.117827169182	0.0371635525592109	0.790670199716987	0.942091414679381	271.117827169182	-0.0800504020421414	0.566218223638104	0.926498719294022	271.117827169182	-0.20449416048402	0.151053538559425	0.26789632809462	271.117827169182	-0.280253333806012	0.0543782785660211	0.0921671177032658	271.117827169182	-0.1912138743705	0.175234427586066	0.563029740092295	271.117827169182	0.108924765514295
ENSG00000123080.6	CDKN2C	chr1	51426417	51440305	+	13888	4021	325	138	148.925925925926	TRUE	142.956483478001	-0.23351540183133	0.102130679026462	0.239537305707954	142.956483478001	-0.473223524142123	0.00122188389019946	0.0197171788049601	142.956483478001	-0.502502447604215	0.000595834415714021	0.00573665381028796	142.956483478001	-0.531061527308725	0.000392119830160545	0.00153795929744807	142.956483478001	-0.3376046893229	0.0185777125450762	0.317103195547205	142.956483478001	-0.338827336067264	0.0165364450232846	0.201548156669934	142.956483478001	-0.117311143772797	0.410384508354503	0.555899705453037	142.956483478001	-0.279178108618247	0.0597932051447665	0.0998329875474623	142.956483478001	-0.10408928749157	0.485817755272012	0.79097093076009	142.956483478001	0.134396188074859
ENSG00000123091.4	RNF11	chr1	51701943	51739127	+	37184	5869	316	207	217.37037037037	FALSE	215.541556285926	0.048298487080806	0.70710132053591	0.810363241480388	215.541556285926	0.000888635345513594	0.994528616630541	0.997801587520198	215.541556285926	0.447725038912176	0.000336115310418496	0.00358381526461988	215.541556285926	0.472889199080793	0.00018664810004477	0.000811476628701201	215.541556285926	0.02811108795628	0.826383766136629	0.955062890665147	215.541556285926	0.316013036952255	0.0106733305196779	0.149791676039192	215.541556285926	0.964914948796181	1.98106304052688e-15	1.37667905001775e-13	215.541556285926	0.792657031923874	2.36290157893438e-10	2.75150309536184e-09	215.541556285926	-0.0201873991245261	0.878407307875814	0.961359038839006	215.541556285926	0.315124401606742
ENSG00000085832.12	EPS15	chr1	51819935	51985000	-	165065	3538	198	126	131.037037037037	TRUE	129.383359697187	0.0291521234102558	0.863469520356206	0.915755920850391	129.383359697187	0.000311230231218503	0.998544040502713	0.999223911840887	129.383359697187	0.490306496941429	0.00285885376616062	0.0202922099695272	129.383359697187	0.570957309727578	0.000572759621693898	0.00213195233699193	129.383359697187	0.00160882588995158	0.992412610090814	0.997738824075667	129.383359697187	0.218534342586636	0.183926869293166	0.668777860842188	129.383359697187	0.619414337475739	0.000155183664705542	0.000981084107679867	129.383359697187	0.725584644680193	1.21787386168242e-05	5.77886512451397e-05	129.383359697187	-0.0275432975203042	0.874229935228885	0.959771024781614	129.383359697187	0.218223112355417
ENSG00000117859.14	OSBPL9	chr1	52042851	52254889	+	212038	5238	285	189	194	FALSE	191.369702589109	-0.0890591452480261	0.505202217420954	0.65532553176522	191.369702589109	-0.0280301246257798	0.833680294824095	0.925948533359961	191.369702589109	0.504877519572043	7.90886356146644e-05	0.00111722421818289	191.369702589109	0.531577972500509	4.07060879947419e-05	0.000217191554334793	191.369702589109	-0.144234437304737	0.280476686186273	0.710634403077659	191.369702589109	0.166389679966936	0.195498231434312	0.681751622933819	191.369702589109	0.707565302868389	2.40803554035449e-08	4.68398244948864e-07	191.369702589109	0.423709692817419	0.00135287972343802	0.00374486494598953	191.369702589109	-0.0551752920567108	0.691221689167316	0.888641223583813	191.369702589109	0.194419804592715
ENSG00000078618.15	NRD1	chr1	52254863	52344477	-	89614	8702	446	329	322.296296296296	FALSE	319.026649951552	0.399937519195194	0.0218531393066345	0.098162596726695	319.026649951552	0.163532965740946	0.351887834164988	0.59877912065555	319.026649951552	0.288288853442841	0.0994460073604424	0.260305663859335	319.026649951552	0.483341905218469	0.00575852498893113	0.0149913020633292	319.026649951552	0.226567105686507	0.195370446497176	0.658906903117873	319.026649951552	0.302330537878867	0.0820744693521457	0.478185059099012	319.026649951552	0.198593496332384	0.258276373785121	0.398411386824614	319.026649951552	0.477400651439932	0.00665962253557632	0.0150896574780597	319.026649951552	-0.173370413508687	0.322243025469131	0.68550868725033	319.026649951552	0.138797572137922
ENSG00000169213.6	RAB3B	chr1	52373628	52456436	-	82808	1792	138	63	66.3703703703704	FALSE	67.6827110749452	0.450702998880469	0.0589570231760819	0.16928779363822	67.6827110749452	0.0979606324990934	0.690141865016269	0.842225244419372	67.6827110749452	0.614165764793335	0.00941107149652533	0.0495086709924046	67.6827110749452	1.51782631873355	3.11860081324035e-11	6.45985173261829e-10	67.6827110749452	0.422457050151526	0.0762544343726988	0.524408987222303	67.6827110749452	-0.222768281095487	0.365724129144654	0.838596280159523	67.6827110749452	-0.154992777728787	0.538622281828741	0.671077633582372	67.6827110749452	1.02934806591944	1.29045988453194e-05	6.09643246985294e-05	67.6827110749452	-0.0282459487289427	0.905663609433858	NA	67.6827110749452	-0.32072891359458
ENSG00000117862.7	TXNDC12	chr1	52485803	52521843	-	36040	6119	370	208	226.62962962963	FALSE	219.87310339523	-0.289246760871497	0.112221800589325	0.254210109273978	219.87310339523	-0.208482861984962	0.251625783226043	0.503543746878498	219.87310339523	-0.0107303917151506	0.952539785621706	0.980180956854817	219.87310339523	-0.000899027168791192	0.996051903606952	0.997440935895538	219.87310339523	-0.20910153493316	0.248484015241547	0.692551820670944	219.87310339523	0.104374373889315	0.557846571781925	0.923043613019166	219.87310339523	0.809713904613883	4.42952076604388e-06	4.61537852974608e-05	219.87310339523	0.258047225045315	0.154219910451244	0.221693323868281	219.87310339523	0.080145225938337	0.665870152987331	0.883771535813391	219.87310339523	0.312857235874277
ENSG00000198841.3	KTI12	chr1	52497775	52499488	-	1713	973	90	32	36.037037037037	FALSE	32.6501879028767	-1.37099729485463	0.0116349723979407	0.0707240423062708	32.6501879028767	-0.478730976634506	0.36520242973652	0.610791875439637	32.6501879028767	-0.550169731523041	0.29861049713274	0.524389592170774	32.6501879028767	-1.54155557024518	0.00537767444786519	0.014149441440383	32.6501879028767	-0.701916272282058	0.185814820558183	0.64997951083493	32.6501879028767	-0.12722188713475	0.807423339017916	0.976230426249868	32.6501879028767	-0.317174999606032	0.547378239092254	0.678182356039965	32.6501879028767	-1.16116649566615	0.0341662053997284	0.0617748187731626	32.6501879028767	0.669081022572571	0.227137086277776	NA	32.6501879028767	0.351509089499756
ENSG00000134717.13	BTF3L4	chr1	52521797	52556388	+	34591	6707	552	256	248.407407407407	FALSE	229.870590485088	-1.09840869227887	0.00165330765843715	0.0259973578334907	229.870590485088	-0.612539322816323	0.0776481261846085	0.264568565967881	229.870590485088	-0.0297194077358933	0.931399855977207	0.970137575365145	229.870590485088	-1.1063627436473	0.00159461631111938	0.00510620912408611	229.870590485088	-0.467196623181792	0.177340204254844	0.645276705917664	229.870590485088	0.178813545398813	0.603422548523536	0.933439890287506	229.870590485088	0.345149839196248	0.31642773807802	0.458878798219169	229.870590485088	-0.635493451026521	0.0685581057776002	0.112462440031521	229.870590485088	0.63121206909708	0.0723134538079178	0.496317242611233	229.870590485088	0.791352868215137
ENSG00000157077.10	ZFYVE9	chr1	52608046	52812358	+	204312	1450	84	58	53.7037037037037	FALSE	51.674988787755	0.145396745199752	0.600967799783644	0.732802436341892	51.674988787755	0.205642798177305	0.459073833801947	0.684650404443984	51.674988787755	0.271153840175909	0.326073157715414	0.551692990385573	51.674988787755	0.0580383587317293	0.838353183275654	0.880986509791013	51.674988787755	0.287308957665001	0.295545592449601	0.7228327095533	51.674988787755	0.479263591694306	0.0748837159165879	0.460251768939542	51.674988787755	0.839224945344484	0.00178636455528032	0.00770040188736894	51.674988787755	0.288368713618248	0.308151952990583	0.396616188038813	51.674988787755	0.141912212465249	0.611981124709103	NA	51.674988787755	0.273620793517001
ENSG00000154222.10	CC2D1B	chr1	52811395	52831865	-	20470	1546	167	41	57.2592592592593	FALSE	50.9587011194299	-1.81434997102087	0.00366731152868026	0.0403591614848503	50.9587011194299	-1.10011508500528	0.0737868287432748	0.257515426380737	50.9587011194299	-0.570829807475202	0.349595647995042	0.573475290076771	50.9587011194299	-2.24420312905867	0.000441175746038211	0.00169942396227593	50.9587011194299	-0.743295590367231	0.223890550351747	0.677243271636226	50.9587011194299	0.185188590513771	0.759440951217224	0.971397509879247	50.9587011194299	-0.103332502658084	0.864959731011264	0.916208727980831	50.9587011194299	-0.883137560667468	0.152414622316401	0.219514758566008	50.9587011194299	1.07105438065364	0.0894640611622819	NA	50.9587011194299	1.28530367551905
ENSG00000085840.8	ORC1	chr1	52838501	52870131	-	31630	1059	80	42	39.2222222222222	FALSE	36.8004902163296	0.176211891027601	0.478413463263728	0.632600092275466	36.8004902163296	-0.205155526631939	0.424585764220056	0.658386814879292	36.8004902163296	-0.786692578110684	0.00375048183801706	0.0248790623542671	36.8004902163296	-1.39095561211134	4.53065591624576e-06	3.18699281879916e-05	36.8004902163296	0.024227806906899	0.922897635190964	0.985884443490419	36.8004902163296	-0.191107228865256	0.445957143288335	0.878357189420704	36.8004902163296	-1.04826883390737	0.000207100275654073	0.00125498106561965	36.8004902163296	-1.84446416757174	4.06177431206463e-08	3.20222408481802e-07	36.8004902163296	-0.151984084120702	0.550445240373187	NA	36.8004902163296	0.0140482977666835
ENSG00000134748.12	PRPF38A	chr1	52870236	52886511	+	16275	13210	824	496	489.259259259259	FALSE	477.975339523312	0.345199032978877	0.0338255124452333	0.124251194626923	477.975339523312	0.120876686916912	0.459386116868017	0.684748342683221	477.975339523312	-0.256777408857836	0.118581407751914	0.294301840610093	477.975339523312	0.0160443776809514	0.92220646432574	0.944792902519903	477.975339523312	0.0245724741559682	0.880468131988576	0.971074392254131	477.975339523312	-0.159392803161015	0.32917990572984	0.814033793603139	477.975339523312	-0.286574113395336	0.0821665163751779	0.167874056669502	477.975339523312	-0.0573669549772032	0.728541831112373	0.787566588891051	477.975339523312	-0.320626558822909	0.0500585324400862	0.485862226624366	477.975339523312	-0.280269490077927
ENSG00000134744.9	ZCCHC11	chr1	52873954	53019159	-	145205	3641	219	132	134.851851851852	FALSE	134.955156417993	0.122054160911098	0.518923134873213	0.666501811477489	134.955156417993	-0.228305083591034	0.238709063637048	0.486968750322074	134.955156417993	0.0839600695818472	0.658275337505951	0.815788109576406	134.955156417993	0.533781790987549	0.00442041241249358	0.011989516448995	134.955156417993	-0.0816551162624271	0.668780103230939	0.89820420036487	134.955156417993	0.059773364450229	0.749892104008372	0.968788644713665	134.955156417993	0.3315463655679	0.0778377914461242	0.160884684310687	134.955156417993	0.87509115855507	2.58036576890632e-06	1.43266828805836e-05	134.955156417993	-0.203709277173525	0.293082478782315	0.664252791084358	134.955156417993	0.288078448041263
ENSG00000162378.8	ZYG11B	chr1	53192126	53293014	+	100888	3447	247	130	127.666666666667	FALSE	124.058212096929	-0.0247415362741886	0.875782473935285	0.923811675590691	124.058212096929	-0.253415448223375	0.117578725673967	0.333830602679595	124.058212096929	0.0608307894951741	0.699300562242098	0.840428583659716	124.058212096929	0.265712165076568	0.0917378571564112	0.155458233061317	124.058212096929	-0.0629450025662217	0.690514716184386	0.906895396490344	124.058212096929	-0.212040090018643	0.1784327492103	0.661513623164378	124.058212096929	0.0244126702763009	0.877749901544667	0.924203873282098	124.058212096929	-0.0444838310807009	0.786001849716139	0.833187100381839	124.058212096929	-0.0382034662920331	0.814651121388178	0.935536450420048	124.058212096929	0.0413753582047324
ENSG00000116171.12	SCP2	chr1	53392901	53517375	+	124474	2105	137	80	77.962962962963	FALSE	73.3349204784366	-0.8013798227429	0.00767801296859767	0.0579288615105038	73.3349204784366	-0.365383831205838	0.21561968325539	0.461227851701147	73.3349204784366	0.146076708108607	0.613756336873925	0.785145242702288	73.3349204784366	-0.357908037842269	0.228840629031863	0.323849515580155	73.3349204784366	-0.345302155884478	0.239767696663283	0.684585235966704	73.3349204784366	-0.0017729884389263	0.995095464031495	0.998910881704753	73.3349204784366	0.104331827100297	0.719361535192481	0.812310096809542	73.3349204784366	-0.698130598215009	0.0224572109897668	0.0430226879188225	73.3349204784366	0.456077666858422	0.137570411404013	NA	73.3349204784366	0.363610842766912
ENSG00000162384.9	C1orf123	chr1	53679771	53686289	-	6518	2840	200	98	105.185185185185	FALSE	101.479359646746	-0.322181634556461	0.0558499163009818	0.165164984733396	101.479359646746	-0.355362669639067	0.0362960756493279	0.169962003480039	101.479359646746	-0.304831378414427	0.0704378118960829	0.207863912708406	101.479359646746	-0.124861934994814	0.460033440736957	0.560694223314054	101.479359646746	-0.406664909188067	0.0160642746035236	0.297690009158199	101.479359646746	-0.30847382096541	0.0612515170535529	0.413264414471433	101.479359646746	0.122759759581127	0.452836050030011	0.595011930940622	101.479359646746	-0.037477269547311	0.825560260543894	0.866275300183479	101.479359646746	-0.0844832746316057	0.634740605495084	0.867409753545737	101.479359646746	0.0468888486736576
ENSG00000162385.6	MAGOH	chr1	53692564	53704282	-	11718	27779	2040	1026	1028.85185185185	FALSE	971.839389249011	-0.0708028982361378	0.631866800242724	0.758210744777497	971.839389249011	-0.190010217344871	0.199301641037012	0.443424281129856	971.839389249011	-0.266746679939656	0.0717237014058624	0.21015065723371	971.839389249011	-0.791315775776611	1.25044070922574e-07	1.25308609786136e-06	971.839389249011	-0.0258416916184153	0.861082406576179	0.965759580659997	971.839389249011	-0.10101314187919	0.493452637622538	0.898565643090573	971.839389249011	-0.41165785538458	0.0055654965268288	0.0195831067664698	971.839389249011	-1.05408938631416	3.07465803296704e-12	4.97079329644971e-11	971.839389249011	0.0449612066177224	0.761730796218444	0.921369074339256	971.839389249011	0.0889970754656807
ENSG00000157193.10	LRP8	chr1	53711217	53793742	-	82525	9827	630	393	363.962962962963	FALSE	355.178584234494	0.415551365543195	0.00172430822877521	0.026771827040281	355.178584234494	-0.0452304951887358	0.737766636060375	0.872420916644385	355.178584234494	0.190519225839178	0.154173814390725	0.348052333928447	355.178584234494	0.552134204731576	3.30599218563174e-05	0.000180645115178115	355.178584234494	0.231268341526728	0.0825343368141247	0.535665684864754	355.178584234494	0.103730366469489	0.435037096893079	0.874641778797868	355.178584234494	-0.478537740560182	0.000538215849439846	0.00280569024478109	355.178584234494	-0.0949082735635837	0.490918384709726	0.579009542984357	355.178584234494	-0.184283024016467	0.166922912806147	0.559013713256887	355.178584234494	0.148960861658224
ENSG00000058804.10	NDC1	chr1	54231133	54304533	-	73400	10377	814	337	384.333333333333	FALSE	358.222669053505	-0.267166303227928	0.223598525043891	0.388770881820664	358.222669053505	-0.104644775080768	0.633091640342614	0.806288895186566	358.222669053505	-0.480926679733312	0.0290092476147659	0.112549611299612	358.222669053505	-0.982219583664881	1.09574649580695e-05	6.90208154559102e-05	358.222669053505	-0.0558253878650957	0.798671332187613	0.943857968665785	358.222669053505	-0.0283897744970023	0.896546855984613	0.986943692087067	358.222669053505	-0.363966790261445	0.0981728420084462	0.192853289180131	358.222669053505	-1.1834422694971	1.59106377248455e-07	1.12841123683122e-06	358.222669053505	0.211340915362833	0.337791355997794	0.696059897852027	358.222669053505	0.0762550005837658
ENSG00000058799.9	YIPF1	chr1	54317392	54356407	-	39015	4233	260	157	156.777777777778	FALSE	152.81584860872	0.0730037629090604	0.591987038535755	0.726355193139041	152.81584860872	-0.0532763488600481	0.700215776142588	0.847676221272925	152.81584860872	0.313553344366622	0.0190646287174039	0.0826773556405986	152.81584860872	0.373051946619577	0.00587019008218392	0.0152267994997528	152.81584860872	-0.204167773392172	0.141838159887037	0.615417635320545	152.81584860872	0.151976373697868	0.252181446795102	0.753483885933909	152.81584860872	0.251870137475496	0.0623170538400479	0.135260970513777	152.81584860872	0.118897096798733	0.397685942150022	0.490321900630526	152.81584860872	-0.277171536301232	0.0523121512630365	0.488669628902345	152.81584860872	0.205252722557916
ENSG00000081870.7	HSPB11	chr1	54382247	54411602	-	29355	5615	431	225	207.962962962963	FALSE	191.079997939795	-0.680076931212488	0.0724081872778104	0.191194999417121	191.079997939795	-0.249737919982142	0.50782430036735	0.720672265524614	191.079997939795	-0.101115205426752	0.788309645327074	0.892506137666982	191.079997939795	-1.22540018230857	0.00137289186244369	0.00448623783795119	191.079997939795	-0.273424885090516	0.468200155452892	0.814508299227466	191.079997939795	0.208336244037188	0.578716452368826	0.929897910108182	191.079997939795	0.051669067760898	0.890794070498859	0.932228868774431	191.079997939795	-1.28085206653309	0.000873277153666782	0.00255866345907741	191.079997939795	0.406652046121972	0.284854357272541	0.656006955787749	191.079997939795	0.45807416401933
ENSG00000116212.10	LRRC42	chr1	54411750	54433841	+	22091	48457	2562	1775	1794.7037037037	FALSE	1759.24282745285	0.133863312533478	0.247869444994838	0.411936549184286	1759.24282745285	0.269010401468664	0.0201099453524799	0.120739956299064	1759.24282745285	0.235336002851387	0.0420381048134739	0.145537303807836	1759.24282745285	0.264024481281373	0.0228154979847744	0.0484836365313936	1759.24282745285	0.0413020195775347	0.721607967934232	0.91902096655177	1759.24282745285	0.213848622634513	0.064060298246964	0.423714233579341	1759.24282745285	0.561998467358622	1.13068820044714e-06	1.41204930771783e-05	1759.24282745285	0.277639119849462	0.0169126555832536	0.0337211885665109	1759.24282745285	-0.0925612929559428	0.425943986561478	0.752375870469109	1759.24282745285	-0.0551617788341512
ENSG00000116209.7	TMEM59	chr1	54497347	54519177	-	21830	6026	488	196	223.185185185185	FALSE	209.838939054025	-1.27668170310502	4.0076199167028e-05	0.0026361573146739	209.838939054025	-0.708633768020356	0.0212753005042346	0.125482042741266	209.838939054025	0.0507250988021392	0.867744831009299	0.937834843698373	209.838939054025	-0.68727944797172	0.0259264529748401	0.0541541497311182	209.838939054025	-0.778698715861979	0.0113598801707243	0.266725033872293	209.838939054025	-0.151924959883227	0.617746225594637	0.934212023933782	209.838939054025	0.441057978011302	0.146467692970456	0.262012063592779	209.838939054025	-0.304026654271659	0.322894619908593	0.412265956401296	209.838939054025	0.49798298724304	0.113705508783491	0.530161071357132	209.838939054025	0.556708808137129
ENSG00000116221.11	MRPL37	chr1	54649714	54691137	+	41423	8706	639	313	322.444444444444	FALSE	306.89856690101	-0.112376477690731	0.42507640557535	0.584005642034883	306.89856690101	-0.178423997143465	0.20721712928752	0.452453617898001	306.89856690101	-0.441816458300625	0.00197917848667625	0.0152137208025774	306.89856690101	-0.509865834834591	0.000426561672224094	0.0016497674728703	306.89856690101	-0.0725777867733473	0.605429883933659	0.872777856016053	306.89856690101	-0.149221978013729	0.286260466781119	0.783081410239016	306.89856690101	-0.419515809427067	0.00336809941879995	0.0129278007535854	306.89856690101	-0.755689334534381	3.43288264450473e-07	2.27897917932953e-06	306.89856690101	0.0397986909173838	0.780404917631805	0.92725139636226	306.89856690101	0.0292020191297359
ENSG00000157216.11	SSBP3	chr1	54691105	54879152	-	188047	2125	180	74	78.7037037037037	FALSE	74.3144678503728	-0.335381141757292	0.134113321512416	0.282349008422303	74.3144678503728	-0.216535276342017	0.331220643257608	0.579572459871685	74.3144678503728	-0.504842937361736	0.0260152482527815	0.103544292930355	74.3144678503728	-0.755639735184059	0.00133746601398757	0.0043837750637242	74.3144678503728	-0.180637369380614	0.413909377359793	0.793472103383612	74.3144678503728	-0.386951041371557	0.0802721074842746	0.472770133120648	74.3144678503728	-0.179847691623595	0.419660635088226	0.564328291597261	74.3144678503728	-0.298337471472806	0.193938182894125	0.269369007414358	74.3144678503728	0.154743772376678	0.500769651067633	NA	74.3144678503728	-0.170415765029539
ENSG00000116133.7	DHCR24	chr1	55315306	55352891	-	37585	53400	3127	2044	1977.77777777778	FALSE	1900.81783220508	0.379704371500314	0.0100770617935124	0.0652887529884936	1900.81783220508	0.856415414951986	6.05184037425456e-09	5.79430094499462e-07	1900.81783220508	0.364239087345166	0.0135930219337057	0.0642165953962403	1900.81783220508	-0.130825123770061	0.377783825325715	0.482418971966758	1900.81783220508	0.652793650859768	9.40437433227743e-06	0.00126621083783179	1900.81783220508	0.529709480942535	0.000322728085405961	0.0109918889800125	1900.81783220508	-0.00310949607645628	0.983237369145448	0.989322327174956	1900.81783220508	-0.797145370117629	1.04350427313279e-07	7.67224942114785e-07	1900.81783220508	0.273089279359454	0.0639061033245743	0.495139396925625	1900.81783220508	-0.326705934009452
ENSG00000162402.8	USP24	chr1	55532032	55680786	-	148754	2768	179	96	102.518518518519	FALSE	98.4902039546555	-0.427377070536997	0.02628476618496	0.107304796233221	98.4902039546555	-0.249447470851324	0.189927599002376	0.43136692688547	98.4902039546555	0.185332088306316	0.314634852758945	0.540844316520655	98.4902039546555	-0.0589856233386854	0.75648374347159	0.81727939035791	98.4902039546555	-0.0877463143313259	0.638394509576797	0.887634401592671	98.4902039546555	-0.0352287113469874	0.848020981177858	0.980820144407289	98.4902039546555	-0.0878293756256233	0.641288354700319	0.756362134198282	98.4902039546555	0.142244093344631	0.453158434501964	0.543411894649226	98.4902039546555	0.339630756205671	0.0852930399656539	0.51135826606288	98.4902039546555	0.214218759504337
ENSG00000162407.8	PPAP2B	chr1	56960419	57110974	-	150555	1516	115	61	56.1481481481481	FALSE	53.094461549706	-0.388837812554391	0.185186076435216	0.343911297552211	53.094461549706	0.204862625239658	0.473470569800765	0.694214037769813	53.094461549706	0.14202839693096	0.619739745363106	0.788701430482039	53.094461549706	-0.162861681040979	0.579056017527444	0.668237003218694	53.094461549706	0.0416792436924533	0.884386495767893	0.972665970252526	53.094461549706	-0.382814769214684	0.186237583906187	0.670925038249802	53.094461549706	-1.10185064754177	0.000390854879763769	0.00213164335374962	53.094461549706	-1.55173117805756	3.92303178434139e-06	2.06883506032251e-05	53.094461549706	0.430517056246845	0.147546138526346	NA	53.094461549706	-0.587677394454342
ENSG00000162409.6	PRKAA2	chr1	57110995	57181008	+	70013	4131	231	155	153	FALSE	152.946278109004	-0.294906917171086	0.145058945180094	0.296131942813757	152.946278109004	0.21433105702855	0.277306266026722	0.530068343911327	152.946278109004	0.578996853936238	0.00284330731777082	0.0202151643211478	152.946278109004	0.996817422584987	2.27182371758367e-07	2.15124230488116e-06	152.946278109004	-0.179931244649448	0.369260152243709	0.770625994643748	152.946278109004	0.466884635607582	0.0155352506868586	0.19206205906551	152.946278109004	0.782140806417004	5.08243244834867e-05	0.000381824938164084	152.946278109004	0.733121446357135	0.00018190269604111	0.000644248060742394	152.946278109004	0.114975672521637	0.579916610818644	0.840437144586049	152.946278109004	0.252553578579031
ENSG00000162601.5	MYSM1	chr1	59120411	59165764	-	45353	1867	121	67	69.1481481481482	FALSE	67.9187181309328	0.0353246121556496	0.876180491578198	0.923910408235685	67.9187181309328	-0.119284634323327	0.605024841835283	0.789684801892553	67.9187181309328	0.303611178675714	0.172345052796702	0.373193891388069	67.9187181309328	0.43022440235843	0.0546205533041322	0.100979469603456	67.9187181309328	-0.0103573466959172	0.963534646512145	0.990818108729487	67.9187181309328	0.242065351426032	0.27006296940246	0.770318638643164	67.9187181309328	0.673467174686871	0.00201639912021667	0.00855084213528892	67.9187181309328	0.750391277963056	0.000699425850484431	0.00210071542475578	67.9187181309328	-0.0456819588515668	0.844642190443252	NA	67.9187181309328	0.361349985749359
ENSG00000177606.5	JUN	chr1	59246465	59249785	-	3320	50926	2908	1850	1886.14814814815	TRUE	1847.93143239393	-0.148787816320272	0.201567786975474	0.363979383983165	1847.93143239393	0.229290260578709	0.0482299680517988	0.199041012788482	1847.93143239393	0.612464968684003	1.18937627426568e-07	4.30624174594429e-06	1847.93143239393	0.714648215382188	6.68483315104552e-10	1.10350971767355e-08	1847.93143239393	0.0432961789630769	0.709441088170381	0.914610092274711	1847.93143239393	0.0227439498102312	0.844534855237465	0.980440289108405	1847.93143239393	0.186439547800652	0.108520482699809	0.20859980868367	1847.93143239393	0.250525821830847	0.0315865634433138	0.0577144650532305	1847.93143239393	0.192083995283349	0.100347446485584	0.522420750539714	1847.93143239393	-0.206546310768478
ENSG00000162599.11	NFIA	chr1	61330931	61928465	+	597534	8828	563	305	326.962962962963	FALSE	325.682008226914	-0.206586915968933	0.134301470966843	0.282545399646612	325.682008226914	-0.0711453903477082	0.604607113635034	0.789627438086801	325.682008226914	-0.0241684437307005	0.859928558397479	0.932897442743432	325.682008226914	0.364847050944605	0.00728602718486782	0.0182245852690874	325.682008226914	-0.209214726410454	0.128633211494162	0.595844826339617	325.682008226914	-0.327141957760898	0.0170962906441775	0.205179298719885	325.682008226914	0.202146268967173	0.13729130327039	0.249902653206791	325.682008226914	0.844956043933964	3.37113235151625e-10	3.83232816266696e-09	325.682008226914	-0.00262781044152085	0.985142420048964	0.996690527768203	325.682008226914	-0.25599656741319
ENSG00000162604.8	TM2D1	chr1	62146718	62191095	-	44377	10152	702	363	376	FALSE	377.340624338329	0.149383031030169	0.31223862331361	0.47891780297141	377.340624338329	0.141677401090942	0.338768357658639	0.586649304249294	377.340624338329	0.105603477277447	0.475987193687558	0.684281222556838	377.340624338329	0.731853563953927	5.6307230878309e-07	4.91092518702823e-06	377.340624338329	0.0541311997064286	0.714714622008157	0.916336244285715	377.340624338329	-0.184829948571121	0.212622755804475	0.702519281735876	377.340624338329	0.695392137532566	1.85990292713647e-06	2.16871224940933e-05	377.340624338329	1.11267149653992	2.09860797175671e-14	4.86121099264182e-13	377.340624338329	-0.0952518313237405	0.523794828950302	0.810124579102379	377.340624338329	-0.326507349662063
ENSG00000162607.8	USP1	chr1	62901968	62917475	+	15507	17362	1296	604	643.037037037037	FALSE	604.506117340467	-0.303109964649774	0.0249464761277313	0.104554370035341	604.506117340467	-0.341632800257454	0.0116531714119592	0.0852422564149849	604.506117340467	-0.500393321089337	0.000230337919969082	0.00266061911042035	604.506117340467	-1.02722804832121	1.46885637896186e-13	4.44110014649627e-12	604.506117340467	-0.177137101400857	0.188612537690001	0.652610010234527	604.506117340467	0.121635987597322	0.362760470102536	0.83801432402222	604.506117340467	-0.239787559939229	0.0762241476268	0.15830886481083	604.506117340467	-0.91320289583752	5.65615707816217e-11	7.26365209277547e-10	604.506117340467	0.125972863248917	0.355697215333495	0.707108922048514	604.506117340467	0.463268787854776
ENSG00000116641.11	DOCK7	chr1	62920399	63153969	-	233570	2035	119	75	75.3703703703704	FALSE	73.9272116086732	-0.0113815516567792	0.958466453708353	0.973304234944601	73.9272116086732	-0.178816044441943	0.420678236101486	0.655394026484633	73.9272116086732	0.188683827522196	0.382216944551921	0.604656400074151	73.9272116086732	-0.0205192791744538	0.926530798098044	0.947420895598771	73.9272116086732	-0.263344429731048	0.235077968555911	0.68444357008255	73.9272116086732	0.103288594459933	0.628713372917601	0.934540299019156	73.9272116086732	0.316264858296669	0.141440108223291	0.255372813369414	73.9272116086732	0.148544082666019	0.504092789776387	0.59155216798354	73.9272116086732	-0.251962878074268	0.26847229335038	NA	73.9272116086732	0.282104638901876
ENSG00000142856.12	ITGB3BP	chr1	63906441	64059392	-	152951	4695	272	176	173.888888888889	FALSE	169.308455821658	0.36825639753881	0.0105935012090265	0.0668802197275719	169.308455821658	0.247443561592422	0.0889919363717221	0.286743749478695	169.308455821658	-0.169600487482708	0.256245634262563	0.477523492742324	169.308455821658	0.154872582941618	0.295900597890639	0.396728715111815	169.308455821658	0.132550926363838	0.362783665979664	0.765639688892179	169.308455821658	-0.0221850764620482	0.878644884992272	0.98474254093816	169.308455821658	-0.118985022361046	0.426252581602526	0.570787645014602	169.308455821658	-0.0594189883666464	0.696891057693402	0.76158658771643	169.308455821658	-0.235705471174973	0.107103446341494	0.525218823405403	169.308455821658	-0.26962863805447
ENSG00000079739.11	PGM1	chr1	64058947	64125916	+	66969	5839	359	209	216.259259259259	FALSE	210.786272064967	-0.00635694010142591	0.961784829470665	0.975138236915957	210.786272064967	0.321582413755113	0.0133897170069751	0.0936519411112861	210.786272064967	0.498766422972847	0.000102199404594379	0.00135903127992247	210.786272064967	0.176700286200556	0.184570395784012	0.272113791620951	210.786272064967	-0.0591726090580072	0.655571629736412	0.894263215678116	210.786272064967	0.449917818098393	0.000389669924218356	0.0127828173015386	210.786272064967	0.574160182917921	7.62091711182173e-06	7.47092636547985e-05	210.786272064967	0.262674429070482	0.0498738497885749	0.0855760580701215	210.786272064967	-0.0528156689565813	0.699106793323007	0.893394936882053	210.786272064967	0.12833540434328
ENSG00000185483.7	ROR1	chr1	64239693	64647181	+	407488	1319	88	45	48.8518518518519	FALSE	47.0569191850264	-0.149137696610275	0.504088701377765	0.654373657693914	47.0569191850264	-0.302731628255004	0.183741369944611	0.423215962877726	47.0569191850264	0.214341569167238	0.3224878474056	0.547885997849774	47.0569191850264	0.0458418403438074	0.837848624580242	0.880563678254415	47.0569191850264	-0.493007864805992	0.0319122680895203	0.39669933684357	47.0569191850264	-0.396714804738411	0.07557586202656	0.461764873033626	47.0569191850264	-0.705240753688166	0.00325744201171835	0.0125646274910372	47.0569191850264	-0.794205258209645	0.00164469750167109	0.0044288619912187	47.0569191850264	-0.343870168195717	0.151435425144986	NA	47.0569191850264	-0.0939831764834075
ENSG00000162437.10	RAVER2	chr1	65210778	65298915	+	88137	1032	80	34	38.2222222222222	FALSE	36.4563260880859	-0.455358604891531	0.0859775593262816	0.214880958301213	36.4563260880859	-0.736877816940234	0.00756617980122979	0.0649225272189001	36.4563260880859	-0.25520504473317	0.326446420521457	0.552107714550224	36.4563260880859	-0.39960364986022	0.139831201104909	0.218323149106903	36.4563260880859	-0.0721471681898276	0.776131088008183	0.93858619132664	36.4563260880859	0.0892613571353304	0.717271897692286	0.957835045043431	36.4563260880859	0.160021605053359	0.524908183286235	0.658868727658775	36.4563260880859	-0.24256325535164	0.369314791803554	0.461215298691481	36.4563260880859	0.383211436701703	0.161686621725377	NA	36.4563260880859	0.826139174075565
ENSG00000162434.7	JAK1	chr1	65298912	65432187	-	133275	6132	369	221	227.111111111111	TRUE	220.714022714599	-0.123093919284627	0.377090007806568	0.542853160114197	220.714022714599	0.130312298689412	0.343382641239821	0.590250991335235	220.714022714599	0.767918870938565	7.84024711710589e-09	3.70055421173422e-07	220.714022714599	0.489184606349804	0.000327387770927065	0.00131827122527033	220.714022714599	-0.0987459276104421	0.476400279708628	0.81914616011002	220.714022714599	0.0272731513654128	0.841127758355117	0.980440289108405	220.714022714599	0.0855715066769042	0.535880078930495	0.668937945841529	220.714022714599	-0.0375066716754866	0.792445821825842	0.838470732646522	220.714022714599	0.0243479916741851	0.864884255784821	0.957190900562803	220.714022714599	-0.103039147323999
ENSG00000162433.10	AK4	chr1	65613232	65697828	+	84596	19571	1069	745	724.851851851852	FALSE	721.228618904167	0.317867701331719	0.0278927997491294	0.110914746395131	721.228618904167	0.925766528213832	1.01379689732305e-10	1.32361937336859e-08	721.228618904167	0.838746355413926	4.85799563346058e-09	2.43379932404243e-07	721.228618904167	0.4230694345234	0.003515530339908	0.00986753255341604	721.228618904167	0.167165189149347	0.248645891809602	0.692551820670944	721.228618904167	0.873162619166225	9.58003175663399e-10	1.16269202319599e-07	721.228618904167	1.19407995679426	6.07783750165213e-17	5.63147588728348e-15	721.228618904167	0.877013747687476	1.18279278767618e-09	1.22944818472927e-08	721.228618904167	-0.150702512182371	0.299491055187815	0.669914202393798	721.228618904167	-0.0526039090476076
ENSG00000213625.4	LEPROT	chr1	65886270	65901690	+	15420	4714	369	158	174.592592592593	FALSE	167.401636803826	-0.332704584199251	0.133031209183614	0.280688033676592	167.401636803826	-0.519681961476295	0.0199320748105637	0.120276392606882	167.401636803826	-0.0530929581527607	0.809121355772541	0.903091030466668	167.401636803826	0.0416258081242731	0.850272085267559	0.889930105520534	167.401636803826	-0.396947154538117	0.0732818636559703	0.519803277129431	167.401636803826	-0.0254043650765147	0.907315942573517	0.990319718567401	167.401636803826	-0.360730840688428	0.104641252258496	0.202627791171114	167.401636803826	-0.176090975947626	0.430667627700926	0.521949781701671	167.401636803826	-0.0642425703388651	0.776056948210266	0.925751400960177	167.401636803826	0.49427759639978
ENSG00000198160.10	MIER1	chr1	67390578	67454302	+	63724	4509	246	160	167	FALSE	166.483987973147	-0.072667812629131	0.632400520316375	0.758537415195411	166.483987973147	0.10010179872631	0.505845486338637	0.719997118030444	166.483987973147	0.223069284616581	0.133997166118131	0.317736263192057	166.483987973147	0.389663059572298	0.00906805055054864	0.0220172982795372	166.483987973147	-0.0101652789028677	0.946174268318929	0.98834821757848	166.483987973147	0.0952752391512019	0.518415535746585	0.912073332194685	166.483987973147	0.724490793613549	5.82957158439099e-07	7.91594864298117e-06	166.483987973147	0.757765099039209	2.70785860256393e-07	1.83440389766457e-06	166.483987973147	0.0625025337262634	0.688326917577056	0.88797553352451	166.483987973147	-0.00482655957510841
ENSG00000116704.6	SLC35D1	chr1	67465015	67519782	-	54767	1638	126	57	60.6666666666667	FALSE	57.2974124983489	-0.17504643981979	0.407811695063014	0.56927156590928	57.2974124983489	-0.617858997433854	0.0053345514270477	0.0523551590511049	57.2974124983489	-0.323439448940418	0.131842913836782	0.314619326649557	57.2974124983489	-0.509415072091024	0.0227375672562909	0.0483538047994715	57.2974124983489	-0.147763769248986	0.481708967452914	0.821241757668135	57.2974124983489	-0.191082127049971	0.357332649312176	0.83659698369234	57.2974124983489	-0.273906996247752	0.202615811758387	0.333576700405431	57.2974124983489	-0.454652044710591	0.0442261871355626	0.0772233139913156	57.2974124983489	0.0272826705708045	0.900904961490036	NA	57.2974124983489	0.426776870383883
ENSG00000142864.10	SERBP1	chr1	67873493	67896098	-	22605	74550	4422	2586	2761.11111111111	FALSE	2705.28758233245	0.208954012053374	0.20478088983417	0.367700964305281	2705.28758233245	0.0282849090882586	0.86380905391537	0.937475555284112	2705.28758233245	-0.121200849053043	0.462538122469585	0.674330894940391	2705.28758233245	-0.0492265353207961	0.765522310483275	0.823716758482176	2705.28758233245	0.145257282142537	0.378086664271719	0.776617074176465	2705.28758233245	-0.0509551318954085	0.757163987534316	0.970471825164838	2705.28758233245	-0.0598288792811992	0.716857479497006	0.81051685493674	2705.28758233245	0.0558637472981868	0.735124101581213	0.792504783080727	2705.28758233245	-0.0636967299108377	0.699289410342151	0.893394936882053	2705.28758233245	-0.0792400409836671
ENSG00000116717.7	GADD45A	chr1	68150744	68154021	+	3277	5090	351	178	188.518518518519	FALSE	185.279544384251	-0.153236327027369	0.341433769460819	0.5075271332489	185.279544384251	-0.430802362791287	0.00864798564985878	0.0701692018312929	185.279544384251	-0.00397242300353664	0.980198635698351	0.991159748162572	185.279544384251	0.490503361979702	0.00191503615037636	0.00597028455419432	185.279544384251	-0.277761871281232	0.0858940665749515	0.541324008400783	185.279544384251	-0.385898779459958	0.0165215166004681	0.201548156669934	185.279544384251	-0.415560956737507	0.0114287569115593	0.0353741373228829	185.279544384251	0.0500094929803593	0.758755465732819	0.810888732260908	185.279544384251	-0.124525544253862	0.452467149100563	0.770361367664387	185.279544384251	0.044903583331329
ENSG00000172380.5	GNG12	chr1	68167149	68299150	-	132001	11131	728	408	412.259259259259	FALSE	400.321401893432	-0.0274996790544916	0.857352137112914	0.911511827945957	400.321401893432	-0.228738765746239	0.137467620110858	0.363120212108147	400.321401893432	-0.0391403441545519	0.798246371854434	0.897857849663185	400.321401893432	0.148083494265081	0.333770333718177	0.437762399642242	400.321401893432	0.0770827800154374	0.61318254019447	0.87654179642597	400.321401893432	-0.198124960213744	0.194554447455136	0.679009993406604	400.321401893432	-0.181975945435824	0.237212478145774	0.375263433850218	400.321401893432	-0.420005871899244	0.00745447335019244	0.0166541863776532	400.321401893432	0.104582459069929	0.497001863451122	0.794802710643294	400.321401893432	0.0306138055324942
ENSG00000116729.9	WLS	chr1	68564142	68698803	-	134661	8142	452	293	301.555555555556	FALSE	298.343355041513	0.194067518842859	0.15716091171567	0.309473394939198	298.343355041513	0.218108482329389	0.112217565136006	0.325691734178836	298.343355041513	0.323721908231152	0.0177532363661575	0.0780906777780393	298.343355041513	0.245588108063218	0.0758445765580641	0.13291696485679	298.343355041513	0.0531271002085653	0.699774686042853	0.910157507812285	298.343355041513	0.0617782435337281	0.650925439616749	0.941168052014688	298.343355041513	0.465217489015432	0.000631449315856691	0.00321774024526145	298.343355041513	0.530439266494183	0.000116027272738656	0.000434132439943116	298.343355041513	-0.140940418634294	0.311147896618825	0.67814285160513	298.343355041513	-0.156330238795661
ENSG00000024526.12	DEPDC1	chr1	68939835	68962904	-	23069	4342	335	148	160.814814814815	FALSE	150.336355157694	-0.608172166381272	0.00759708568039605	0.0575761541846726	150.336355157694	-0.585761172625253	0.0101970658084949	0.0777996004474586	150.336355157694	-0.815308093650866	0.000383469801805479	0.00396058649880826	150.336355157694	-0.937645578406309	5.57786497423041e-05	0.000283065150076228	150.336355157694	-0.456155863030229	0.0440464550921207	0.450294580347439	150.336355157694	-0.262416194823051	0.24214424239183	0.741113120963366	150.336355157694	-0.571556118097742	0.0122459997527548	0.0373403325794368	150.336355157694	-1.28771409085689	7.15939901785608e-08	5.43546619708069e-07	150.336355157694	0.152016303351043	0.511985676552643	0.805396746017551	150.336355157694	0.323344977802202
ENSG00000066557.5	LRRC40	chr1	70610488	70671303	-	60815	3004	189	106	111.259259259259	FALSE	105.640637117176	-0.178154887729371	0.482723882990958	0.635932074565523	105.640637117176	-0.423570399077958	0.0989983623696965	0.304142098440442	105.640637117176	-0.144208866698807	0.569742845319521	0.754119120820851	105.640637117176	-0.42994894584985	0.0969058819368822	0.162585277385147	105.640637117176	-0.190790993923528	0.451729382523979	0.806685128423161	105.640637117176	0.218056959163719	0.381279739113721	0.844859649739159	105.640637117176	0.14118829813759	0.575019749029763	0.701336897011956	105.640637117176	-0.378449115525887	0.146422387457532	0.212215340131273	105.640637117176	-0.012636106194157	0.960953973867809	0.990166620822681	105.640637117176	0.641627358241677
ENSG00000116754.9	SRSF11	chr1	70671365	70718735	+	47370	33105	1754	1215	1226.11111111111	FALSE	1219.1077489113	0.379197285457548	0.00112784315732142	0.0213159355783371	1219.1077489113	-0.0481708314864601	0.681410489679595	0.837500240988314	1219.1077489113	0.165001291626625	0.157936455195968	0.352940465358831	1219.1077489113	0.418195920557177	0.00034189571665726	0.00136583930942773	1219.1077489113	0.357468242715661	0.00213642981838541	0.102847015335347	1219.1077489113	0.0958883451850323	0.410502061579099	0.861959585467932	1219.1077489113	0.336149169361659	0.00395666080314161	0.0147659359639113	1219.1077489113	0.828394883718342	1.10770617307401e-12	1.92441614785862e-11	1219.1077489113	-0.0217290427418865	0.852059503399735	0.952297537534737	1219.1077489113	0.144059176671492
ENSG00000118454.8	ANKRD13C	chr1	70726271	70820417	-	94146	1123	80	36	41.5925925925926	FALSE	39.7897909275214	-0.539868912795667	0.113476676464278	0.255909060741347	39.7897909275214	-0.512263397393091	0.133717258053531	0.358762089775346	39.7897909275214	0.113717302838417	0.728365578299212	0.856735694442147	39.7897909275214	0.0147744258896237	0.964658795741242	0.973812657322198	39.7897909275214	-0.368046378248741	0.272858791345947	0.703387073746095	39.7897909275214	0.377964888566357	0.236924157737133	0.733324521271866	39.7897909275214	0.607650092501496	0.0582303608224578	0.128527412706741	39.7897909275214	0.239918520250263	0.470220941387359	0.559829058519089	39.7897909275214	0.171822534546926	0.62755130108749	NA	39.7897909275214	0.890228285959448
ENSG00000132485.8	ZRANB2	chr1	71528974	71546980	-	18006	20635	1059	770	764.259259259259	FALSE	765.517754110088	0.277517286160782	0.119650887171588	0.263354200448933	765.517754110088	-0.0139238272149654	0.938005791299263	0.971840315453379	765.517754110088	0.192485012265853	0.280963244670313	0.504702997565997	765.517754110088	0.297762705954078	0.0957408243243633	0.16084981150381	765.517754110088	0.225038701150112	0.207039013043385	0.665178323890711	765.517754110088	0.28042011511295	0.114989244264852	0.551932358090824	765.517754110088	0.569148778495587	0.00138393501952649	0.00626990960213445	765.517754110088	0.988357028077167	2.74403461331027e-08	2.21398373248076e-07	765.517754110088	-0.0524785850106695	0.768932224199546	0.925066842674451	765.517754110088	0.294343942327915
ENSG00000116791.9	CRYZ	chr1	75171170	75199092	-	27922	3215	227	125	119.074074074074	FALSE	113.094620917932	-0.4488919880848	0.0616292783011076	0.174117865941195	113.094620917932	0.0135366754104012	0.954287167721295	0.978706560849131	113.094620917932	0.0904007243710079	0.700840616854592	0.841020704330009	113.094620917932	-0.325358112861781	0.177778922961426	0.26439782173949	113.094620917932	-0.384922306650832	0.107296064871139	0.565960594427347	113.094620917932	0.0732044054479718	0.753890451378348	0.970165229880966	113.094620917932	0.256233956864029	0.27455651210428	0.416157161794649	113.094620917932	-0.390723202774016	0.109995781928205	0.167402623255977	113.094620917932	0.063969681433968	0.795107873713729	0.928949489130127	113.094620917932	0.0596677300375706
ENSG00000162623.11	TYW3	chr1	75198836	75232362	+	33526	9798	615	355	362.888888888889	FALSE	352.526027114246	-0.0231923729007138	0.895359927097281	0.936027372012127	352.526027114246	-0.198098856829966	0.26355317513081	0.516967382222215	352.526027114246	-0.305160506697277	0.0856326563171801	0.235859841337976	352.526027114246	-0.402170201271326	0.0246666815411257	0.0518927721777052	352.526027114246	-0.0761323449543024	0.666009035806092	0.897324472523637	352.526027114246	-0.0618035800543812	0.724960557296882	0.959598329067164	352.526027114246	-0.0858651314385483	0.627364310944519	0.745243764462217	352.526027114246	-0.129106252539068	0.469658911167945	0.559396700489133	352.526027114246	-0.0529399720535886	0.765878643802001	0.923399783307377	352.526027114246	0.136295276775584
ENSG00000117054.9	ACADM	chr1	76190036	76253260	+	63224	5711	357	198	211.518518518519	FALSE	207.101129119459	-0.0478611253690655	0.731082524221653	0.828693628816235	207.101129119459	-0.282763577958299	0.0465074284464716	0.195109304246955	207.101129119459	-0.127701801151838	0.362315877674159	0.584987056008662	207.101129119459	0.144821842479484	0.29959269346146	0.400743595088078	207.101129119459	0.0080853661859172	0.953391561927939	0.989473675511272	207.101129119459	0.227211631895139	0.0930092679096931	0.504070650135737	207.101129119459	0.360763678575099	0.00827058390152881	0.0270568039026096	207.101129119459	0.289552397478166	0.0383429364975288	0.0685053045405776	207.101129119459	0.0559464915549827	0.693807662174302	0.890270124610667	207.101129119459	0.509975209853437
ENSG00000137955.11	RABGGTB	chr1	76251879	76260764	+	8885	1984	130	67	73.4814814814815	FALSE	70.9629202222874	-0.174452171119567	0.425716166689376	0.584325614584637	70.9629202222874	-0.352257770603907	0.114061640537125	0.328718781440938	70.9629202222874	-0.427803459276291	0.0559521082550497	0.17759249313267	70.9629202222874	-0.265359004071243	0.237814170277687	0.33386195915328	70.9629202222874	-0.403334799212689	0.0692515945016922	0.516132933166892	70.9629202222874	-0.0368477392515179	0.862968233019538	0.983785848380802	70.9629202222874	0.403616265922955	0.0570623741821335	0.126500251692165	70.9629202222874	0.228945530488811	0.295491102089942	0.383586445722964	70.9629202222874	-0.228882628093121	0.319638958342176	NA	70.9629202222874	0.315410031352389
ENSG00000142892.10	PIGK	chr1	77554675	77685115	-	130440	1465	128	46	54.2592592592593	FALSE	50.7501591187279	-0.695868268090322	0.00933519818192888	0.0629830056631181	50.7501591187279	-0.420847969456774	0.110261133930787	0.322743723370036	50.7501591187279	-0.0350769360495113	0.891583596389528	0.94909758268767	50.7501591187279	-0.820516631712892	0.00289787467417183	0.00841718578923111	50.7501591187279	-0.717192251546591	0.0072507782489328	0.21340225788136	50.7501591187279	-0.341776244513576	0.185104058853227	0.669542319989531	50.7501591187279	-0.998473487537511	0.000301095504263375	0.00170357187146258	50.7501591187279	-1.21931647721589	2.83187440740265e-05	0.000123243746306003	50.7501591187279	-0.0213239834562698	0.939765741523816	NA	50.7501591187279	0.0790717249431984
ENSG00000036549.8	ZZZ3	chr1	78028101	78149104	-	121003	5021	306	186	185.962962962963	FALSE	182.148329424017	-0.184403916877984	0.30803594676822	0.475288737934533	182.148329424017	-0.0478480984258545	0.790584750159617	0.904108075734588	182.148329424017	-0.0297024928924251	0.868820080276667	0.938290842429382	182.148329424017	0.0213899004103313	0.905991095792023	0.933097524033954	182.148329424017	-0.112297731433045	0.53263306557922	0.845715704089946	182.148329424017	0.0150756296285705	0.932396384263191	0.993045315246149	182.148329424017	0.171212730845515	0.33838879118414	0.481886665614566	182.148329424017	0.221295218896004	0.221274886951284	0.301697104566332	182.148329424017	0.0721061854449392	0.695417340936269	0.891171336125636	182.148329424017	0.062923728054425
ENSG00000077254.10	USP33	chr1	78161672	78225537	-	63865	10950	592	397	405.555555555556	FALSE	402.727825201062	0.392097237446688	0.0231590974050334	0.100636380403012	402.727825201062	0.248667489573461	0.151316587161758	0.381925902628258	402.727825201062	0.206942572856471	0.232588409586619	0.450689076997504	402.727825201062	0.384041704225066	0.0268436513415536	0.0557022267130909	402.727825201062	0.0109145153698078	0.949942528355799	0.989157785657323	402.727825201062	0.0864121332116774	0.617168378041626	0.934212023933782	402.727825201062	0.240763138385856	0.165131897736662	0.286536448348066	402.727825201062	0.527177801631895	0.00239811592431229	0.00616484633645556	402.727825201062	-0.381182722076881	0.0284818687916249	0.456499461396257	402.727825201062	-0.162255356361783
ENSG00000180488.10	FAM73A	chr1	78245309	78344106	+	98797	1667	88	59	61.7407407407407	FALSE	61.2368410341617	0.164281200652585	0.451768188148714	0.607234195733585	61.2368410341617	-0.00738730053474141	0.973495825791775	0.988174523600863	61.2368410341617	0.397782525407231	0.0641209034154788	0.194896551062042	61.2368410341617	0.570137481253007	0.00814485073967958	0.020058353479228	61.2368410341617	-0.0672268785653311	0.761518945760072	0.933434957965202	61.2368410341617	-0.236976083346575	0.283861182172462	0.781479810472876	61.2368410341617	-0.106042270755551	0.637637026689642	0.753292878939491	61.2368410341617	0.0918422190341272	0.68618555367465	0.752751230555628	61.2368410341617	-0.231508079217916	0.305519360965534	NA	61.2368410341617	-0.229588782811834
ENSG00000162614.14	NEXN	chr1	78354198	78409580	+	55382	6948	487	244	257.333333333333	FALSE	244.700021128638	-0.398249542145878	0.0139872195601114	0.0774600713042928	244.700021128638	-0.383035480881848	0.0182408440059351	0.114147678140263	244.700021128638	0.0994920245072323	0.532631972526035	0.729216667819645	244.700021128638	-0.0883437948226108	0.584517195979506	0.673276925244673	244.700021128638	-0.372840882421762	0.0210582029104963	0.333563482499534	244.700021128638	-0.0715846288275781	0.652594904134251	0.941168052014688	244.700021128638	-0.911753299644649	4.5170623456671e-08	8.1429971197936e-07	244.700021128638	-1.13735846178424	4.51555366844187e-11	5.93282963749215e-10	244.700021128638	0.0254086597241159	0.878090445123206	0.961359038839006	244.700021128638	0.31145085205427
ENSG00000162613.12	FUBP1	chr1	78409740	78444794	-	35054	25399	1410	939	940.703703703704	TRUE	917.541320927869	0.476168464865571	0.00031715178566245	0.0104470991826996	917.541320927869	0.155572378159628	0.241778189482061	0.4907897900511	917.541320927869	-0.0658106958460781	0.621610295456386	0.790498216639268	917.541320927869	-0.0705310092674614	0.598306746378501	0.685951201908402	917.541320927869	0.478196846913187	0.000297007899721615	0.0234799731367079	917.541320927869	0.24793603989803	0.060759556288548	0.411869207976307	917.541320927869	0.131152401067753	0.324196924134636	0.467001821342053	917.541320927869	0.109732243961773	0.412505531644937	0.504765715163933	917.541320927869	0.00202838204761601	0.987750884620852	0.997010589496796	917.541320927869	0.0923636617384013
ENSG00000162616.8	DNAJB4	chr1	78444859	78483648	+	38789	1838	110	66	68.0740740740741	FALSE	67.6956235153456	-0.328562342451277	0.151178645067331	0.302322205742677	67.6956235153456	-0.178163077773007	0.430831334358622	0.663225704052206	67.6956235153456	1.00134911927543	9.39145388633004e-07	2.58550026001616e-05	67.6956235153456	1.00408416914839	1.22115444117488e-06	9.8897441913571e-06	67.6956235153456	-0.203732407951328	0.363352489846077	0.766415058268516	67.6956235153456	0.311646094133374	0.138095265124783	0.592217326953656	67.6956235153456	1.24575410523571	7.09854393906894e-10	2.03216455557997e-08	67.6956235153456	0.616314652905456	0.004305147473588	0.0103019871646509	67.6956235153456	0.124829934499949	0.603499785843706	NA	67.6956235153456	0.489809171906382
ENSG00000122420.5	PTGFR	chr1	78769568	79005434	+	235866	533	40	17	19.7407407407407	FALSE	20.7956909972209	0.202891491213913	0.628743403865794	0.756370502737896	20.7956909972209	-0.393493166280675	0.381334498658984	0.625539572614594	20.7956909972209	1.02379036556026	0.00962992553573674	0.0504444184446465	20.7956909972209	1.6532122375296	1.93333209719001e-05	0.000113484486931106	20.7956909972209	-0.592173607636523	0.192667753596292	0.654647252812877	20.7956909972209	-0.412548379244766	0.343310936278629	0.824501209005837	20.7956909972209	1.03993473677339	0.0087392400264202	0.0283318402210921	20.7956909972209	1.50105473390202	0.000134946531737608	0.000493562930383263	20.7956909972209	-0.795065098850436	0.0857473499403869	NA	20.7956909972209	-0.0190552129640914
ENSG00000137959.11	IFI44L	chr1	79085607	79111830	+	26223	6257	438	194	231.740740740741	FALSE	233.703445448537	2.2049782888009	1.02815089308327e-14	5.53723515356159e-12	233.703445448537	3.35740941399849	4.43977513089635e-33	4.25083803365932e-30	233.703445448537	3.63664742849706	1.00058824500112e-38	1.07775861339683e-35	233.703445448537	3.94723308755122	2.19233768468193e-45	8.99589229947818e-43	233.703445448537	2.43450042612689	8.93148988563881e-18	9.6203310430687e-15	233.703445448537	3.52956030813289	1.14397980204496e-36	2.46441848855536e-33	233.703445448537	2.28750745569364	1.015250008524e-15	7.41390620631468e-14	233.703445448537	2.66748278914434	7.46578751172889e-21	3.94679085819435e-19	233.703445448537	0.229522137325992	0.379887000971148	0.719745381779176	233.703445448537	0.172150894134403
ENSG00000137965.6	IFI44	chr1	79115481	79129763	+	14282	8612	569	317	318.962962962963	FALSE	312.281041339873	0.9530124468167	1.19133712662041e-08	2.23467378670291e-06	312.281041339873	1.46446421215092	8.24301414904422e-19	2.44931216973497e-16	312.281041339873	1.18537932648443	1.0108494419703e-12	9.89828368347511e-11	312.281041339873	1.37929428273883	1.11313187781513e-16	4.94425638718194e-15	312.281041339873	0.931869133360235	2.43919461743576e-08	6.36925455104361e-06	312.281041339873	1.3785618944633	5.79446788805388e-17	1.92042037659078e-14	312.281041339873	0.0869217372066334	0.615724784387855	0.735472756732762	312.281041339873	0.307343296123914	0.0774347054150719	0.124511076051815	312.281041339873	-0.0211433134564651	0.897601379199747	0.965586049573706	312.281041339873	-0.0859023176876143
ENSG00000117114.15	LPHN2	chr1	81771845	82458120	+	686275	840	54	30	31.1111111111111	FALSE	31.0661886036638	-0.35832983509966	0.205406444796973	0.368440327813389	31.0661886036638	-0.313592727765429	0.26786515585752	0.520684423195183	31.0661886036638	0.380647815792846	0.143940666276559	0.333060614855495	31.0661886036638	0.591166595162383	0.0232810307413673	0.049290575405003	31.0661886036638	-0.529430851332783	0.0651765195412247	0.504624318891394	31.0661886036638	-0.262716207983279	0.332510201826619	0.814295852301077	31.0661886036638	0.478357842985043	0.0655069610359867	0.140801067962216	31.0661886036638	0.610341073083352	0.0207023697461847	0.0401061870734877	31.0661886036638	-0.171101016233123	0.580536658933706	NA	31.0661886036638	0.0508765197821506
ENSG00000137941.12	TTLL7	chr1	84330711	84464833	-	134122	2015	109	73	74.6296296296296	FALSE	73.4156227080295	0.0994476280954331	0.680550586231893	0.791782023595174	73.4156227080295	0.204834467829878	0.39471688157017	0.637067176005585	73.4156227080295	0.435391162920395	0.0664045041274385	0.19916728578703	73.4156227080295	0.798351597254245	0.00069443444496753	0.00250899019383028	73.4156227080295	-0.0216431452121785	0.928923670223368	0.986838223288571	73.4156227080295	0.401327643249306	0.087014987232551	0.489750584574064	73.4156227080295	0.32578354898487	0.173693146609633	0.296555150452786	73.4156227080295	0.0891680675695733	0.719732498226384	0.78051031175645	73.4156227080295	-0.121090773307612	0.624421121119138	NA	73.4156227080295	0.196493175419428
ENSG00000117133.6	RPF1	chr1	84944942	84963473	+	18531	8732	581	322	323.407407407407	FALSE	307.230245214972	-0.226771266929982	0.18903027712161	0.348198781093826	307.230245214972	-0.129302438455897	0.453335728671095	0.681364209169875	307.230245214972	-0.0903519962358243	0.599722748478583	0.775598217565653	307.230245214972	-0.296259333591311	0.0888912834676006	0.151528425250309	307.230245214972	-0.0891280328752032	0.604133584254843	0.872434907914192	307.230245214972	0.0278136116603992	0.870621791918144	0.983804164608692	307.230245214972	-0.67595126426523	0.000117345425121493	0.000779018126557709	307.230245214972	-0.979598516567429	5.61920104150025e-08	4.34265967485271e-07	307.230245214972	0.137643234054778	0.429665466004947	0.75475158082039	307.230245214972	0.157116050116297
ENSG00000174021.6	GNG5	chr1	84964008	84972248	-	8240	7454	487	287	276.074074074074	FALSE	265.791682569508	-0.0665693269068053	0.657623135943155	0.776889798525445	265.791682569508	0.250377450199934	0.0919174773813922	0.291947254919077	265.791682569508	0.371623467323583	0.0119127536794583	0.0583582708674768	265.791682569508	0.344741330276057	0.0207512742167905	0.0445919526000209	265.791682569508	0.0584257533686067	0.695233414900651	0.907929674548083	265.791682569508	0.183159892267619	0.214021683625042	0.70369991796249	265.791682569508	-0.249412984573366	0.101133097410594	0.197431785316512	265.791682569508	-0.214090982429524	0.166032063334968	0.235972008866472	265.791682569508	0.124995080275412	0.410873937577723	0.74343420858832	265.791682569508	-0.0672175579323154
ENSG00000117151.8	CTBS	chr1	85015289	85040163	-	24874	1776	130	60	65.7777777777778	FALSE	66.6149406697821	-0.193880950468889	0.463844363516638	0.618722427310042	66.6149406697821	0.294489276997809	0.245656497973841	0.495479237717915	66.6149406697821	1.30358004740623	3.80287829222946e-08	1.55305223905883e-06	66.6149406697821	1.73652915656741	1.36605877965706e-13	4.14483398038903e-12	66.6149406697821	0.259727098406688	0.303103485718976	0.730243007355662	66.6149406697821	0.478224785913957	0.0506375270165774	0.381086087599867	66.6149406697821	1.16138685934859	1.24318362659118e-06	1.53474402726879e-05	66.6149406697821	1.50804152260766	2.85449461277071e-10	3.28839305858893e-09	66.6149406697821	0.453608048875577	0.089734745065864	NA	66.6149406697821	0.183735508916147
ENSG00000117155.12	SSX2IP	chr1	85109390	85156486	-	47096	4399	342	143	162.925925925926	FALSE	154.72130799423	-0.536910589042387	0.000563229784763904	0.0144444971884243	154.72130799423	-0.62336211821662	7.42842120981843e-05	0.00225389808327484	154.72130799423	-0.378838354320159	0.0139615493014475	0.0654122072999294	154.72130799423	-0.6495279672837	5.03536568476323e-05	0.000259496150511568	154.72130799423	-0.250872889241452	0.0990351639851835	0.556475934793829	154.72130799423	0.120436361265747	0.414272458518783	0.863482670321321	154.72130799423	-0.117661666265615	0.439166310616746	0.582439597530244	154.72130799423	-0.236918257208441	0.130798720785486	0.193293187619368	154.72130799423	0.286037699800935	0.0747596320727326	0.49988264115379	154.72130799423	0.743798479482367
ENSG00000153898.8	MCOLN2	chr1	85391268	85462796	-	71528	604	39	20	22.3703703703704	FALSE	22.192061805829	-0.360528718412964	0.258646198394159	0.424625467238702	22.192061805829	-0.327896379236806	0.305005881113791	0.556594653878977	22.192061805829	0.000433585168318203	0.998876727094288	0.999685162714453	22.192061805829	0.444531920930232	0.140576747955249	0.219248839299616	22.192061805829	-1.08316631590071	0.0018442446312039	0.0902946362902502	22.192061805829	-0.748005681524399	0.0211201262454225	0.231542147400517	22.192061805829	-1.04104523544722	0.00323661465518282	0.0125057115152768	22.192061805829	-0.0559139371915557	0.862018969089309	0.893972494480993	22.192061805829	-0.722637597487745	0.0494522386395699	NA	22.192061805829	-0.420109302287593
ENSG00000162642.9	C1orf52	chr1	85715639	85725355	-	9716	2885	178	100	106.851851851852	FALSE	104.024413204931	0.0593315042675703	0.725308073757948	0.825503139037766	104.024413204931	-0.328264819422035	0.0611776893915682	0.230721480243895	104.024413204931	-0.481667105668312	0.00666333177673655	0.0383041560507931	104.024413204931	-0.0735791853489353	0.672689250524134	0.749878819115972	104.024413204931	0.268077510386279	0.105732220650375	0.565195127384789	104.024413204931	0.182118879342884	0.268447012145891	0.768697664453593	104.024413204931	-0.0727168562523145	0.67222685527925	0.77920080870881	104.024413204931	0.259193904802238	0.130570660289718	0.193022367424344	104.024413204931	0.208746006118709	0.220112163852955	0.605592472618838	104.024413204931	0.510383698764919
ENSG00000142867.8	BCL10	chr1	85731931	85742773	-	10842	1071	96	35	39.6666666666667	TRUE	36.4876637078691	-1.22934711486565	0.00448510863095511	0.0441189281654569	36.4876637078691	-0.714192240820315	0.0902044067861058	0.288844774413829	36.4876637078691	-0.0728780926711626	0.859105925789548	0.932668929710824	36.4876637078691	-0.833088299990475	0.0517712473416022	0.0965403242463939	36.4876637078691	-0.615228950243744	0.140944547801561	0.613393519396996	36.4876637078691	0.0903487076620656	0.823756005392214	0.978021938308513	36.4876637078691	0.0580237992407893	0.887367764733235	0.929885446759855	36.4876637078691	-0.52712853027555	0.215063626756244	0.294159249485485	36.4876637078691	0.614118164621909	0.167591221244861	NA	36.4876637078691	0.80454094848238
ENSG00000153904.14	DDAH1	chr1	85784164	86043933	-	259769	4395	221	163	162.777777777778	FALSE	162.124573814785	0.354608916273895	0.0753982301237742	0.196523457040702	162.124573814785	0.320119962986351	0.109516194985919	0.321205259426026	162.124573814785	0.366186627940113	0.0664416754755399	0.199209435481116	162.124573814785	0.406119775358009	0.0431073115782888	0.0826007791572415	162.124573814785	0.220442059433367	0.270586928425553	0.703018628484111	162.124573814785	0.140851081029827	0.479590172755141	0.894121271880366	162.124573814785	0.214625665938353	0.285931809019524	0.428425386597328	162.124573814785	0.437479399894766	0.0303254731655886	0.0557411694257416	162.124573814785	-0.134166856840527	0.503842785928049	0.799365958443539	162.124573814785	-0.179268881956524
ENSG00000142871.11	CYR61	chr1	86046444	86049645	+	3201	54600	6006	2113	2022.22222222222	FALSE	1865.13082181838	-1.99512161689139	0.0208029229983143	0.0955028169826715	1865.13082181838	-0.772898238433382	0.370303816514793	0.614818494587277	1865.13082181838	0.670208363445161	0.43712360673292	0.652128483244039	1865.13082181838	-0.794285346490833	0.357237620300628	0.462140305379149	1865.13082181838	-0.713807753464411	0.407988343213345	0.791042797025323	1865.13082181838	-0.213903320697383	0.80414395005883	0.976230426249868	1865.13082181838	0.38988822066941	0.651246247859047	0.76417075596609	1865.13082181838	0.0205019298535486	0.98103845362796	0.985498759024496	1865.13082181838	1.28131386342697	0.137742967538844	0.545718960376352	1865.13082181838	0.558994917735999
ENSG00000117174.6	ZNHIT6	chr1	86115106	86174116	-	59010	4618	323	155	171.037037037037	FALSE	165.187526574238	0.0858596507565852	0.592337950011144	0.726355193139041	165.187526574238	-0.349446608792131	0.0338289564655914	0.163674406436834	165.187526574238	-0.207617620206479	0.202780333473494	0.411532288339396	165.187526574238	-0.287966596417378	0.0827874789634907	0.142647411763327	165.187526574238	-0.0157804604178958	0.921811464387086	0.985301434575932	165.187526574238	-0.201400917447419	0.210064805268551	0.699528387273315	165.187526574238	-0.365212247603361	0.0270812138624616	0.0702253445238735	165.187526574238	-0.0837196606618087	0.613126093138719	0.688737784457873	165.187526574238	-0.101640111174481	0.533411044326341	0.813687049367295	165.187526574238	0.148045691344712
ENSG00000122417.11	ODF2L	chr1	86814344	86862023	-	47679	3949	211	151	146.259259259259	FALSE	146.887874360972	0.0581440323313866	0.700253633598841	0.805618899962779	146.887874360972	0.107076346503937	0.478245856314023	0.697754108683208	146.887874360972	0.577754149965015	6.59793301000486e-05	0.000960378188297498	146.887874360972	0.911723500984137	2.13101082630136e-10	3.80973450004956e-09	146.887874360972	0.00663628197731334	0.964929967462128	0.990818108729487	146.887874360972	0.390596874928726	0.00667221778373971	0.110993244483562	146.887874360972	0.842012520275469	3.70971921015781e-09	8.8550278210332e-08	146.887874360972	0.993722993652869	5.75815542303256e-12	8.87621203582676e-11	146.887874360972	-0.0515077503540732	0.74109010350169	0.91000924315595	146.887874360972	0.28352052842479
ENSG00000097033.10	SH3GLB1	chr1	87170259	87213867	+	43608	11955	701	449	442.777777777778	FALSE	429.5244627466	0.145143220501641	0.276369254491078	0.442359118442357	429.5244627466	0.214362431485388	0.107686454678816	0.317805224193415	429.5244627466	0.0858858660855698	0.520559065577768	0.721050870934517	429.5244627466	0.295100907762652	0.0272810773258689	0.0564149372011069	429.5244627466	0.190704160959091	0.151606631892316	0.622194798659622	429.5244627466	0.226010138290887	0.0872569246070553	0.490151837900258	429.5244627466	-0.151576443022066	0.261841254431661	0.401903661992598	429.5244627466	-0.162257856766043	0.236367878015845	0.318695353600772	429.5244627466	0.0455609404574498	0.734021152767723	0.907565514837925	429.5244627466	0.0116477068054986
ENSG00000183291.11	SEP15	chr1	87328132	87380107	-	51975	9054	716	369	335.333333333333	FALSE	311.035268764397	-1.07822018327248	0.0426319960581235	0.141129431437899	311.035268764397	-0.437088653732773	0.410086363966649	0.647793620220094	311.035268764397	0.0278164979734349	0.958136263039043	0.98253721035433	311.035268764397	-0.902792552608685	0.089700773895118	0.152606430139039	311.035268764397	-0.524805411684306	0.322645033369314	0.743332993433112	311.035268764397	0.0800844921535755	0.879797918539065	0.98474254093816	311.035268764397	0.487386287836481	0.357323450263915	0.501891741019061	311.035268764397	-0.735648859104606	0.166793544692864	0.236858927919975	311.035268764397	0.553414771588178	0.299137131823256	0.669656548095956	311.035268764397	0.517173145886349
ENSG00000153936.12	HS2ST1	chr1	87380331	87602334	+	222003	5720	370	221	211.851851851852	FALSE	202.957272641256	-0.501799247901587	0.0277691153354157	0.110576001314823	202.957272641256	-0.344888795583138	0.129135171675812	0.35320062518623	202.957272641256	0.263493097569642	0.239041789440915	0.458305806591866	202.957272641256	-0.393636506410092	0.085586808627536	0.146824911396273	202.957272641256	-0.138176561878916	0.53998370501779	0.847811973728747	202.957272641256	0.0197385583962427	0.929689206668761	0.993045315246149	202.957272641256	0.552699334139314	0.0131385951581655	0.0394478308285408	202.957272641256	0.151373124368463	0.503862944623484	0.591362979272754	202.957272641256	0.363622686022671	0.114653203643318	0.530161071357132	202.957272641256	0.364627353979381
ENSG00000143013.8	LMO4	chr1	87794151	87814606	+	20455	5509	478	202	204.037037037037	FALSE	195.579286713196	-0.455156377238273	0.00275041842783857	0.0345486233129518	195.579286713196	-0.630802100071717	4.19519997879464e-05	0.00142322985107376	195.579286713196	-0.161935334133484	0.280131215307051	0.504057144351783	195.579286713196	0.0496727284810011	0.740417242085473	0.804547308677989	195.579286713196	-0.553129769587571	0.000284660624963926	0.02292449163845	195.579286713196	-0.761071669841769	6.04446095788594e-07	4.65045714947349e-05	195.579286713196	-0.856977468619046	4.54434158255687e-08	8.15803987851928e-07	195.579286713196	-0.586730071919447	0.000189435626744938	0.000665728709486594	195.579286713196	-0.0979733923492976	0.534851316303936	0.814472281342314	195.579286713196	-0.130269569770052
ENSG00000065243.14	PKN2	chr1	89149905	89301938	+	152033	6570	381	246	243.333333333333	FALSE	238.053587002886	0.0771729310112707	0.619577516535398	0.748478825176718	238.053587002886	-0.0122297677651509	0.937673102552236	0.971840315453379	238.053587002886	0.22369274101972	0.148050748110477	0.338935519784266	238.053587002886	0.294483776590868	0.0583316559538149	0.106695792688181	238.053587002886	0.0648373787328556	0.676183587443288	0.901312567003803	238.053587002886	0.192845076428755	0.208463181712757	0.697873829377945	238.053587002886	0.144940878314567	0.351469472375215	0.496005968466627	238.053587002886	0.104305300530868	0.509935185500135	0.596863826875124	238.053587002886	-0.0123355522784151	0.937530233811471	0.982090285151054	238.053587002886	0.205074844193906
ENSG00000137947.7	GTF2B	chr1	89318615	89357627	-	39012	889	62	33	32.9259259259259	FALSE	30.7483033973772	-0.755854765086039	0.0617363725322751	0.174363265195219	30.7483033973772	-0.313551219982907	0.426128801634683	0.659474117041319	30.7483033973772	0.236983575165468	0.535646409042524	0.73181993542571	30.7483033973772	-0.896132727286615	0.0317228735911285	0.0642694558500549	30.7483033973772	-0.119018586439398	0.758887315244741	0.932643570816378	30.7483033973772	0.283516574851468	0.45323071728451	0.880768321959687	30.7483033973772	0.458751459287849	0.227500810183074	0.363638375319524	30.7483033973772	-0.213610212523864	0.593678276602155	0.671795890936411	30.7483033973772	0.63683617864664	0.12283007633338	NA	30.7483033973772	0.597067794834375
ENSG00000137944.12	CCBL2	chr1	89401456	89458636	-	57180	769	55	29	28.4814814814815	FALSE	28.0440959101289	-0.667725712556357	0.0439824335234998	0.14366751435502	28.0440959101289	-0.412610001757663	0.19968533086984	0.443819575987982	28.0440959101289	0.444759892293818	0.126543251948678	0.306741771115965	28.0440959101289	0.658969699332728	0.023577519459115	0.0498325938629369	28.0440959101289	-0.194187447883587	0.529129339697744	0.843198537243308	28.0440959101289	0.245357188154809	0.396568724748548	0.852119235014689	28.0440959101289	0.874767595303388	0.0019578394740112	0.00833944772494043	28.0440959101289	0.841622870933368	0.00373218039072373	0.00908736886885176	28.0440959101289	0.47353826467277	0.17315551877613	NA	28.0440959101289	0.657967189912472
ENSG00000213516.5	RBMXL1	chr1	89445139	89458643	-	13504	4670	278	178	172.962962962963	FALSE	168.026809828922	0.102159555110437	0.405204763710556	0.567139649259373	168.026809828922	0.433362053410242	0.000295885719394464	0.0070238216088763	168.026809828922	0.300213763564377	0.0129387960842895	0.0620788451326962	168.026809828922	0.330883849913522	0.00703082236309156	0.0176786099511993	168.026809828922	0.0317518633723745	0.796096150729189	0.942537497834432	168.026809828922	0.0134931291411809	0.911221202023296	0.991881117603117	168.026809828922	-0.271766268677029	0.0347784560410433	0.0855268138429425	168.026809828922	-0.386404392908853	0.00432166664923433	0.0103300420295291	168.026809828922	-0.0704076917380629	0.577546276826784	0.839194176616507	168.026809828922	-0.419868924269061
ENSG00000117228.9	GBP1	chr1	89518002	89531043	-	13041	2409	163	105	89.2222222222222	FALSE	88.428581096458	1.48513415131286	5.31706581400640e-09	1.17479887485367e-06	88.428581096458	1.86249708292391	1.43800666232358e-13	2.81620532028233e-11	88.428581096458	1.6531760830626	6.68399466907926e-11	5.02871834367072e-09	88.428581096458	1.58557801669532	5.52598349777191e-10	9.31847354213318e-09	88.428581096458	1.32141606740959	2.31311315618805e-07	4.98302401671811e-05	88.428581096458	1.23292370235225	1.27086822330287e-06	8.97628809852528e-05	88.428581096458	-0.331104543129982	0.246630441236722	0.385281818734017	88.428581096458	-0.306888511973082	0.296494755194664	0.38448386839916	88.428581096458	-0.16371808390327	0.499554497542439	0.796391227966206	88.428581096458	-0.629573380571656
ENSG00000162645.8	GBP2	chr1	89571815	89616139	-	44324	1271	121	39	47.0740740740741	FALSE	48.7139773885533	-0.129332737997715	0.705886311943595	0.809490667385784	48.7139773885533	0.638855953111654	0.04842448045761	0.199486325118253	48.7139773885533	1.67135480934083	5.53343099547672e-08	2.15732375709298e-06	48.7139773885533	2.39190387972035	2.95110906129759e-15	1.11046754503063e-13	48.7139773885533	0.0816396029674779	0.807288429424629	0.947609916408122	48.7139773885533	0.716020972423091	0.023819911533383	0.249097303013545	48.7139773885533	0.603345677793123	0.0635955174067272	0.137275193760964	48.7139773885533	1.39049382196092	1.10571274900427e-05	5.30508171390298e-05	48.7139773885533	0.210972340965193	0.547048327922481	NA	48.7139773885533	0.0771650193114375
ENSG00000197147.8	LRRC8B	chr1	89990395	90063423	+	73028	2165	132	78	80.1851851851852	FALSE	79.112068480208	0.0941396122264526	0.660988234431775	0.780024050410655	79.112068480208	-0.365253518612238	0.101934690799508	0.309195538114276	79.112068480208	0.0628752421933964	0.770374773966702	0.882051478510639	79.112068480208	0.278402826126133	0.196102373254009	0.285924560123485	79.112068480208	0.131715720539538	0.537095179794268	0.846743804197037	79.112068480208	0.241762285370128	0.248720059123212	0.749998502592352	79.112068480208	0.269680673524859	0.206253678861912	0.338144587281792	79.112068480208	0.438217449210544	0.0419140721340782	0.0736938501488169	79.112068480208	0.0375761083130853	0.863146686578867	0.956211080510948	79.112068480208	0.607015803982366
ENSG00000171488.10	LRRC8C	chr1	90098631	90235462	+	136831	2750	257	95	101.851851851852	FALSE	96.5609114852054	-0.582107574125656	0.00425470853099116	0.0431597526710612	96.5609114852054	-0.612126794968309	0.00278561121864422	0.0345375710374924	96.5609114852054	-0.348097359527406	0.0832086832360346	0.231426560153264	96.5609114852054	-0.179031255435743	0.374141740593174	0.478903651023675	96.5609114852054	-0.419904167092408	0.0366718716553559	0.421335357405602	96.5609114852054	-0.333596316983188	0.0919087964246675	0.501066277713336	96.5609114852054	-1.02015333189566	1.48299042179695e-06	1.78596290233549e-05	96.5609114852054	-0.600150606210878	0.004248155560027	0.0101948445337611	96.5609114852054	0.162203407033248	0.441555833386094	0.764074097870446	96.5609114852054	0.278530477985121
ENSG00000171492.10	LRRC8D	chr1	90286573	90402170	+	115597	1834	140	67	67.9259259259259	FALSE	63.3631712467439	-0.440182466943565	0.054834015203079	0.163553031846636	63.3631712467439	-0.305283813428025	0.179921018635763	0.41936148703932	63.3631712467439	-0.11260082032747	0.615270098056553	0.785619024995826	63.3631712467439	-0.941419971830868	0.000131706751326788	0.000596696675175043	63.3631712467439	0.0301338694487171	0.891550887951344	0.975277017708758	63.3631712467439	0.041151896481388	0.850570903892927	0.981654531596385	63.3631712467439	-0.169972325540961	0.451973069175743	0.594264814704907	63.3631712467439	-0.759640967484137	0.00195315936615681	0.00514532994746965	63.3631712467439	0.470316336392282	0.0439060233330696	NA	63.3631712467439	0.346435709909413
ENSG00000162664.12	ZNF326	chr1	90460671	90501090	+	40419	4653	325	168	172.333333333333	FALSE	164.176464029469	-0.0698644027126663	0.580289451653257	0.716291061424075	164.176464029469	-0.0905632108458714	0.476165379670177	0.696198845418888	164.176464029469	-0.329970646636904	0.010957955001274	0.0552191217812736	164.176464029469	-0.903739758480379	2.44628849284367e-10	4.35530329397394e-09	164.176464029469	0.131007289981659	0.289650150654667	0.717011016429552	164.176464029469	0.213403724373509	0.0785976652115951	0.468522849087605	164.176464029469	0.0464844969575834	0.712165132404206	0.807039314298664	164.176464029469	-0.361596115011822	0.00757608007480083	0.01690395701827	164.176464029469	0.200871692694326	0.118319452290535	0.530161071357132	164.176464029469	0.30396693521938
ENSG00000122482.16	ZNF644	chr1	91380859	91487829	-	106970	5514	326	198	204.222222222222	FALSE	198.537691165851	-0.0765691671482516	0.700048806805384	0.805598366485309	198.537691165851	-0.173064908405711	0.386198101641862	0.629961200616851	198.537691165851	0.19167632510895	0.331271225733093	0.556445253828862	198.537691165851	-0.158146116637064	0.43138520685168	0.533703708175295	198.537691165851	-0.0453153604393986	0.819231796885229	0.951946207392667	198.537691165851	0.23304335799489	0.2339009031711	0.730734764760223	198.537691165851	0.134096010554235	0.498175060159828	0.635309201250687	198.537691165851	-0.036120669571014	0.857701578726993	0.890888922841188	198.537691165851	0.031253806708853	0.876488214363723	0.960558484583022	198.537691165851	0.406108266400601
ENSG00000097046.8	CDC7	chr1	91966408	91991321	+	24913	1020	105	33	37.7777777777778	FALSE	34.0191571194235	-0.811600021911237	0.0297587293226252	0.115094690562415	34.0191571194235	-0.794168581608912	0.0337385289510638	0.163328597736695	34.0191571194235	-0.910248738445424	0.0154639390557905	0.0704668232912463	34.0191571194235	-1.96117753487362	2.61256550722197e-06	1.942405261064e-05	34.0191571194235	-0.685193973840515	0.064156544870173	0.50212256779862	34.0191571194235	-0.164757917161412	0.647057162494274	0.940156927223108	34.0191571194235	-0.519192255468448	0.160012275472343	0.279453947658123	34.0191571194235	-1.36948445389754	0.00060689608224509	0.00185250568214876	34.0191571194235	0.126406048070722	0.743814137509399	NA	34.0191571194235	0.629410664447499
ENSG00000069702.6	TGFBR3	chr1	92145902	92371892	-	225990	3468	187	133	128.444444444444	FALSE	126.305391327819	0.24541638947275	0.136771881104516	0.286059053271266	126.305391327819	0.337273299381296	0.0402162090892636	0.179555996747246	126.305391327819	0.48933474949711	0.00258598328918666	0.0186960047539304	126.305391327819	0.769041115797568	1.97645665535551e-06	1.52199526355661e-05	126.305391327819	0.118443650623828	0.475108692938531	0.81903592151538	126.305391327819	0.342428150360734	0.033660626761154	0.304258871601741	126.305391327819	0.0685830204967174	0.68375719977117	0.786514736149321	126.305391327819	0.427398047650988	0.0107675870857688	0.0228701744929922	126.305391327819	-0.126972738848922	0.450218788802684	0.76963611403672	126.305391327819	0.00515485097943809
ENSG00000174842.12	GLMN	chr1	92711959	92764544	-	52585	1087	80	39	40.2592592592593	FALSE	37.9485690309941	-0.0220010889221656	0.938827591901017	0.963142630735206	37.9485690309941	-0.592658515816055	0.0493938969859017	0.201910441331838	37.9485690309941	-0.286920212398665	0.327190444031774	0.552823540435647	37.9485690309941	-0.800129250985854	0.0109104925587813	0.0258640204619034	37.9485690309941	0.29922795079426	0.285436303831924	0.715835964676768	37.9485690309941	0.035474114009454	0.899618948628972	0.987331158318274	37.9485690309941	-0.207497441589599	0.478090004951332	0.617091308068548	37.9485690309941	-0.121232485404644	0.684059727300867	0.750850757234882	37.9485690309941	0.321229039716425	0.265018986473472	NA	37.9485690309941	0.628132629825509
ENSG00000122484.8	RPAP2	chr1	92764522	92867613	+	103091	2634	156	91	97.5555555555556	FALSE	95.1810148562822	0.0412075759744811	0.854322369278668	0.909075803417422	95.1810148562822	-0.178547627244461	0.432452697664991	0.664487320930675	95.1810148562822	-0.492233841999891	0.0333355786555621	0.124195001270348	95.1810148562822	-0.239566752680847	0.299099364724053	0.400236551182735	95.1810148562822	0.0730185596389663	0.744058951925402	0.926723723800562	95.1810148562822	0.110421104229535	0.618130190040455	0.934212023933782	95.1810148562822	-0.283925674104935	0.215591197394353	0.349135378302414	95.1810148562822	0.198928243246842	0.381262444272092	0.473596436830419	95.1810148562822	0.0318109836644852	0.88869698937392	0.963177808126413	95.1810148562822	0.288968731473997
ENSG00000067208.10	EVI5	chr1	92974253	93257961	-	283708	4577	221	170	169.518518518519	FALSE	169.466118360208	0.191095648873545	0.242284619627361	0.40633837433417	169.466118360208	-0.0608282539597097	0.715050973184317	0.857582665984532	169.466118360208	0.454976940123213	0.00477690306827724	0.0299103874893381	169.466118360208	0.722370618268271	7.03012548420823e-06	4.70696125077097e-05	169.466118360208	0.199031290567889	0.221734354165368	0.677243271636226	169.466118360208	0.211505995011619	0.189129160496771	0.673718882183001	169.466118360208	0.514338836118614	0.00142685438577405	0.00641042974046661	169.466118360208	0.764750348321285	2.30220359163344e-06	1.2974550915046e-05	169.466118360208	0.00793564169434421	0.961681631396064	0.990359988703557	169.466118360208	0.272334248971329
ENSG00000122406.8	RPL5	chr1	93297582	93307481	+	9899	131039	8363	4724	4853.2962962963	TRUE	4716.39672980641	0.221945867607856	0.0996683127133024	0.23575126287415	4716.39672980641	-0.218882963511198	0.104906522320689	0.313307024505878	4716.39672980641	-0.171884695911741	0.202791469538974	0.411532288339396	4716.39672980641	-0.201698069176246	0.135350360864698	0.21227116464923	4716.39672980641	0.0761526406455553	0.57223030475825	0.857698475578682	4716.39672980641	-0.000572771673335465	0.996609651558923	0.998953013690906	4716.39672980641	0.145237357047175	0.281487338159001	0.423838690446131	4716.39672980641	-0.0532850483110259	0.693259055296623	0.758675803846964	4716.39672980641	-0.145793226962301	0.279817372745714	0.651932301138135	4716.39672980641	0.218310191837863
ENSG00000143033.13	MTF2	chr1	93544792	93604638	+	59846	5126	344	170	189.851851851852	FALSE	192.199676132391	0.38026244999428	0.0101382942763994	0.0655575076690739	192.199676132391	0.404276219304652	0.00634875683131136	0.0585639135160462	192.199676132391	0.362114889557088	0.0146004670345141	0.0674234857644203	192.199676132391	0.622512490193526	2.53044438655093e-05	0.000142329238112985	192.199676132391	0.33717462097326	0.0225405565252181	0.343492483942728	192.199676132391	0.434099941874882	0.00278990596221509	0.0580691296531581	192.199676132391	1.0894033376145	2.31981684852674e-14	1.37861115750034e-12	192.199676132391	1.44726406250772	3.11924589653085e-24	2.51201326078564e-22	192.199676132391	-0.0430878290210196	0.771733598638419	0.925751400960177	192.199676132391	0.0298237225702291
ENSG00000117500.8	TMED5	chr1	93615299	93646285	-	30986	3292	305	100	121.925925925926	FALSE	114.612107706513	-0.575178138468739	0.000165043027142833	0.00697144982789115	114.612107706513	-0.846487159168245	8.01277337620934e-08	6.39315446136999e-06	114.612107706513	-0.807149333121047	2.52935128905072e-07	8.22468681424529e-06	114.612107706513	-0.558984967931794	0.000338851640969475	0.00135577208562099	114.612107706513	-0.205216586027509	0.163531596692147	0.633308886042064	114.612107706513	-0.268076877177293	0.0661557367246204	0.432722583661047	114.612107706513	-0.537541900084414	0.000456377491944736	0.00243203763023364	114.612107706513	-0.878783934793486	9.44262137526162e-08	7.03259018069399e-07	114.612107706513	0.369961552441231	0.0191258545326075	0.439996556738908	114.612107706513	0.578410281990952
ENSG00000122483.13	CCDC18	chr1	93645476	93744287	+	98811	3284	218	110	121.62962962963	FALSE	115.555940973761	-0.14106863372882	0.496339581410407	0.647435387982664	115.555940973761	-0.495311168467332	0.0191563419252105	0.117858802413575	115.555940973761	-0.49167665683379	0.0198551152677334	0.0849511063863251	115.555940973761	-0.996056827014156	6.77238230345135e-06	4.55918893037815e-05	115.555940973761	-0.147054678430971	0.477518810521532	0.819701842937586	115.555940973761	0.109376127996282	0.591168522410694	0.932515489233801	115.555940973761	-0.446242242615479	0.0347035031462736	0.0853912297576928	115.555940973761	-0.423939764805402	0.0486231043730883	0.0838305903127054	115.555940973761	-0.0059860447021508	0.977397264115846	0.994285753912495	115.555940973761	0.604687296463614
ENSG00000117505.8	DR1	chr1	93811445	93835055	+	23610	6866	563	227	254.296296296296	FALSE	241.549747026877	-0.290953003560908	0.0326778051979831	0.1220566308587	241.549747026877	-0.590336274052915	2.10531442002097e-05	0.000863880683681938	241.549747026877	-0.418202774876651	0.00231017832418909	0.0170581033586439	241.549747026877	-0.364199760188898	0.00852549743985566	0.0208527423897917	241.549747026877	-0.204212891961107	0.131408740578797	0.600103752666438	241.549747026877	-0.477749094123047	0.000436467491881975	0.014033732752041	241.549747026877	-0.663895174463336	2.02513280868385e-06	2.33921841989662e-05	241.549747026877	-0.925295212944113	2.19992303336618e-10	2.57914786102264e-09	241.549747026877	0.0867401115998006	0.533123097264208	0.813687049367295	241.549747026877	0.112587179929868
ENSG00000137942.12	FNBP1L	chr1	93913688	94020218	+	106530	2667	156	97	98.7777777777778	FALSE	98.0016549115531	-0.19555605576615	0.319431298289682	0.486331424914496	98.0016549115531	-0.0473345797392534	0.80798396984171	0.913730104618652	98.0016549115531	0.594346965716093	0.00141096926804492	0.0116066271706633	98.0016549115531	0.970933665893878	1.43352525618399e-07	1.42148298418152e-06	98.0016549115531	-0.145283437531048	0.455597250236596	0.808641533017643	98.0016549115531	-0.0620588393988211	0.744941164736932	0.966992286518929	98.0016549115531	0.186046052196536	0.332219846230075	0.47498563380862	98.0016549115531	0.386872491056118	0.0454511030726344	0.0790258585909787	98.0016549115531	0.0502726182351023	0.804719694422677	0.929478584663623	98.0016549115531	-0.0147242596595676
ENSG00000137936.12	BCAR3	chr1	94027347	94312706	-	285359	3425	325	111	126.851851851852	FALSE	116.013486723174	-1.20886537875808	0.00100976850834324	0.0201377679635373	116.013486723174	-0.829410637543418	0.0231305130868958	0.131909749351278	116.013486723174	0.00298025062063733	0.993409269975172	0.996763819210068	116.013486723174	-0.947734799329204	0.00990121544176344	0.0237855515644482	116.013486723174	-0.584128202059028	0.107748972449486	0.565960594427347	116.013486723174	-0.364840546606436	0.312445588483108	0.802726188419482	116.013486723174	-0.789927573233855	0.0305201242389944	0.0769432154966104	116.013486723174	-1.4918940153068	6.99216460486858e-05	0.000274494225057643	116.013486723174	0.62473717669905	0.0926107561359482	0.515934798334329	116.013486723174	0.464570090936982
ENSG00000067334.9	DNTTIP2	chr1	94333373	94345474	-	12101	6076	407	219	225.037037037037	FALSE	215.520245059281	-0.121397763918406	0.621844978657078	0.749956358444792	215.520245059281	-0.445065350755655	0.0725542767246846	0.255590510312479	215.520245059281	-0.323694362831388	0.190250486907581	0.397042491083223	215.520245059281	-0.592358100921557	0.0177369541127919	0.0392398802541534	215.520245059281	-0.200080774088351	0.416578467520143	0.794906210157855	215.520245059281	0.188174330273584	0.441017348607575	0.877130292466514	215.520245059281	-0.248102645963811	0.31526592609788	0.45799706786488	215.520245059281	-0.727939374845118	0.00389397513498688	0.00944927731292085	215.520245059281	-0.078683010169945	0.7512349065165	0.914822475381087	215.520245059281	0.633239681029239
ENSG00000023909.5	GCLM	chr1	94350761	94374966	-	24205	22198	1228	789	822.148148148148	FALSE	812.437525960242	0.295194826343178	0.0715596727144843	0.189849045498988	812.437525960242	0.245781473160525	0.133954911014179	0.358920854542656	812.437525960242	-0.06694563289503	0.684196657391726	0.830473203690615	812.437525960242	0.41308795435744	0.011790582090064	0.0276837727166434	812.437525960242	0.403885114730553	0.0135494945628461	0.275630006187769	812.437525960242	0.384159787029037	0.0186553286344994	0.214337289124642	812.437525960242	0.00210070349670057	0.989815488946344	0.993968076943322	812.437525960242	0.468885218401932	0.00432044536804481	0.0103299882731526	812.437525960242	0.108690288387376	0.507039282658984	0.801471693634079	812.437525960242	0.138378313868512
ENSG00000137962.8	ARHGAP29	chr1	94614544	94740624	-	126080	4537	341	149	168.037037037037	FALSE	170.380040498717	0.59184422898061	0.00104561763846607	0.0205709753211464	170.380040498717	0.166700855132896	0.367039493010223	0.612674723818034	170.380040498717	0.79023038350089	1.04247368340377e-05	0.000208422174707432	170.380040498717	1.59707041467498	1.08277119285957e-19	6.86047012416978e-18	170.380040498717	0.297932317214007	0.10278406608669	0.559708799139954	170.380040498717	0.0966208356529459	0.596815575284323	0.933439890287506	170.380040498717	0.221873520467076	0.229440239877092	0.365788445332266	170.380040498717	0.688041953646858	0.000172545635822525	0.000613883461553551	170.380040498717	-0.293911911766603	0.105312458508931	0.524178452878787	170.380040498717	-0.07008001947995
ENSG00000117528.7	ABCD3	chr1	94883933	94984222	+	100289	1815	136	66	67.2222222222222	FALSE	62.4705760047219	-0.466381128447531	0.0352743442322445	0.126775909809463	62.4705760047219	-0.437078006448602	0.0488328926112493	0.200456873730558	62.4705760047219	-0.090373320607317	0.675144529523779	0.826449401301805	62.4705760047219	-0.934412744968079	8.35779878854694e-05	0.000405926461904449	62.4705760047219	-0.243460085978898	0.261608965582102	0.699653772942575	62.4705760047219	0.0181606992314921	0.931321775279786	0.993045315246149	62.4705760047219	-0.572414564477811	0.0110472305200818	0.034408468446052	62.4705760047219	-0.819767313504319	0.000584721930967274	0.00179371622611072	62.4705760047219	0.222921042468633	0.330942077776397	NA	62.4705760047219	0.455238705680094
ENSG00000117519.11	CNN3	chr1	95362507	95392834	-	30327	9774	901	313	362	FALSE	328.979228162918	-1.53760673931298	0.00611280550304962	0.0517346756811613	328.979228162918	-0.949450325784573	0.0897401747195168	0.287789760163036	328.979228162918	-0.112623089379612	0.840134263051428	0.920345403599562	328.979228162918	-1.44556756422168	0.0100051996272643	0.0239952143579562	328.979228162918	-0.756089424689695	0.176251802632037	0.643543128508587	328.979228162918	0.117332586213681	0.833413605929632	0.979570252613412	328.979228162918	0.169039839766667	0.761973652622091	0.843732583480411	328.979228162918	-0.358938761484677	0.520946405756533	0.606841431080669	328.979228162918	0.781517314623288	0.164420541846996	0.559013713256887	328.979228162918	1.06678291199825
ENSG00000172339.9	ALG14	chr1	95439963	95538501	-	98538	927	86	34	34.3333333333333	FALSE	31.6395029558464	-0.51333226404166	0.0746311729997064	0.195292079483289	31.6395029558464	-0.847463798587516	0.00456191361511868	0.0471106676697522	31.6395029558464	-0.335702037368069	0.237374854771515	0.456357209028059	31.6395029558464	-1.3258668493912	4.36369599158205e-05	0.000230686922450691	31.6395029558464	-0.517608785491652	0.0709979098498915	0.516936511595821	31.6395029558464	-0.173048966286411	0.529910662588805	0.915628670448713	31.6395029558464	-0.410926048535901	0.152898474625125	0.270345648496405	31.6395029558464	-1.55397159936114	5.82794386471073e-06	2.94541890218254e-05	31.6395029558464	-0.00427652144999224	0.988777911892408	NA	31.6395029558464	0.674414832301104
ENSG00000152078.5	TMEM56	chr1	95582894	95663163	+	80269	1300	65	50	48.1481481481481	FALSE	48.4700795843388	-0.100124167971728	0.712533176503526	0.815066823567089	48.4700795843388	-0.105576456281407	0.698859593125846	0.847119517770284	48.4700795843388	0.208047936792699	0.43399827716884	0.649264436521509	48.4700795843388	0.5247511873671	0.0468948686068058	0.0888507218084532	48.4700795843388	-0.224719346365288	0.410941618385671	0.791042797025323	48.4700795843388	0.0952343280834645	0.717539379115034	0.957835045043431	48.4700795843388	0.304333587266406	0.251411455131929	0.390626128538016	48.4700795843388	0.600375514660895	0.0237964030132338	0.0452058211563131	48.4700795843388	-0.124595178393561	0.659929191774622	NA	48.4700795843388	0.200810784364872
ENSG00000117569.14	PTBP2	chr1	97187221	97289294	+	102073	2142	135	77	79.3333333333333	FALSE	76.927023434744	0.0170291925534944	0.925566442600933	0.954819350639559	76.927023434744	-0.184677506612349	0.323459098201619	0.572447535264602	76.927023434744	0.0654638665268351	0.718683720734409	0.850333078102659	76.927023434744	-0.234412918295898	0.222609788634837	0.316382739347912	76.927023434744	-0.05901602202011	0.746527167908167	0.927722037188445	76.927023434744	0.166246056446788	0.344895879505051	0.826275666177558	76.927023434744	0.618269809199634	0.000391297080585953	0.00213270521404754	76.927023434744	0.216385865055354	0.243682180536945	0.326615235602248	76.927023434744	-0.0760452145736044	0.687751418911649	0.88797553352451	76.927023434744	0.350923563059137
ENSG00000188641.8	DPYD	chr1	97543299	98386605	-	843306	1040	65	37	38.5185185185185	FALSE	37.5483578868516	-0.431910624003083	0.132019028545753	0.27929341065151	37.5483578868516	-0.313547266481583	0.27083280284145	0.523146807187304	37.5483578868516	0.382428947708805	0.154649552447294	0.348549691466655	37.5483578868516	0.185566582263116	0.502735052624584	0.599926318856951	37.5483578868516	-0.212448499160006	0.447182316279915	0.805975741347842	37.5483578868516	-0.101230763075528	0.710594567609226	0.955852854993553	37.5483578868516	-0.129582118482971	0.644576780726813	0.758475777621596	37.5483578868516	-0.109689995852553	0.703742488444878	0.767516646364955	37.5483578868516	0.219462124843076	0.461897255932195	NA	37.5483578868516	0.212316503406055
ENSG00000162627.12	SNX7	chr1	99127236	99226056	+	98820	12193	938	452	451.592592592593	FALSE	417.902978249909	-0.998520841415205	0.0617718666746219	0.174406348340504	417.902978249909	-0.232535199016992	0.663009169829469	0.824825496332489	417.902978249909	0.0654775350125484	0.902290042388949	0.954343107311351	417.902978249909	-0.665559228216165	0.212973816910368	0.305052423589867	417.902978249909	-0.336379011380644	0.528474837427705	0.842699625229955	417.902978249909	0.00656677590711683	0.990173403064533	0.998910881704753	417.902978249909	-0.332711102245054	0.533073628895448	0.666883777612089	417.902978249909	-1.59326681916446	0.00300815240612546	0.00752431038710685	417.902978249909	0.662141830034561	0.215974308006345	0.601193148862243	417.902978249909	0.239101974924109
ENSG00000162688.11	AGL	chr1	100315640	100389579	+	73939	1090	82	39	40.3703703703704	FALSE	38.6936194999883	-0.615747724438189	0.017440833882111	0.0865712359228978	38.6936194999883	-0.510131750306007	0.0473320044619787	0.19712899103377	38.6936194999883	-0.102858150812505	0.675488352485623	0.826449401301805	38.6936194999883	-0.189129476794464	0.455234463264206	0.556340287895003	38.6936194999883	-0.288349683546829	0.245554688419306	0.691711261885963	38.6936194999883	-0.259314899747216	0.286473992472822	0.783206683444143	38.6936194999883	-0.106142442473932	0.667833924296819	0.776462630860205	38.6936194999883	-0.0917818794180471	0.718508787617317	0.779281337054553	38.6936194999883	0.32739804089136	0.228073944965737	NA	38.6936194999883	0.250816850558791
ENSG00000117620.8	SLC35A3	chr1	100435345	100492535	+	57190	2487	172	94	92.1111111111111	FALSE	88.7922662296187	-0.482925488144382	0.0142800224389611	0.0785765985673868	88.7922662296187	-0.260890342637483	0.179367796375044	0.418524858208437	88.7922662296187	0.0336394241945764	0.859388079455892	0.932668929710824	88.7922662296187	-0.0800523452575303	0.68042626182891	0.756351018857033	88.7922662296187	-0.403753433365452	0.0383536000600133	0.429206658705584	88.7922662296187	-0.262857903813375	0.167161405431426	0.643623695532886	88.7922662296187	-0.061880235808296	0.747196792155379	0.833367170334313	88.7922662296187	-0.115303902156295	0.559238619415939	0.640904266991242	88.7922662296187	0.0791720547789301	0.701179662583187	0.893394936882053	88.7922662296187	-0.00196756117589287
ENSG00000156875.9	HIAT1	chr1	100503653	100548933	+	45280	1752	117	67	64.8888888888889	FALSE	61.8571913049828	-0.324066851847402	0.31887952852114	0.485903606943706	61.8571913049828	-0.222624695898009	0.492391880681435	0.710115621059736	61.8571913049828	0.525940306568238	0.0950937453701441	0.253612752663117	61.8571913049828	-0.289066795383826	0.378742713235119	0.483356925347603	61.8571913049828	-0.244011306731868	0.450298345908799	0.806685128423161	61.8571913049828	0.166664228832688	0.597886477227522	0.933439890287506	61.8571913049828	0.642656369357397	0.0410817664785183	0.0975748571514311	61.8571913049828	0.14766948745674	0.64869787760821	0.720431706579449	61.8571913049828	0.080055545115534	0.80973005974717	NA	61.8571913049828	0.389288924730697
ENSG00000156876.8	SASS6	chr1	100549119	100598511	-	49392	2097	142	70	77.6666666666667	FALSE	74.5667432029761	0.0940137525659893	0.71503048172565	0.81733173649715	74.5667432029761	-0.0706520775804204	0.785844487701699	0.901440621741952	74.5667432029761	-0.0838259002279366	0.747011669364385	0.869223080957546	74.5667432029761	-0.651863861138275	0.0168015409813269	0.0374395858898613	74.5667432029761	-0.00261588382697408	0.991912561715564	0.997428946617398	74.5667432029761	0.218020897266626	0.390429321751175	0.848077641620209	74.5667432029761	-0.000147297450409843	0.999547282017282	0.999663292611759	74.5667432029761	-0.219498089854815	0.412005726110876	0.504297349701337	74.5667432029761	-0.0966296363929634	0.711771147973617	NA	74.5667432029761	0.288672974847047
ENSG00000122435.5	TRMT13	chr1	100598706	100616053	+	17347	1681	96	60	62.2592592592593	FALSE	60.4672508050543	0.186299786885902	0.377289240514579	0.542936103125272	60.4672508050543	-0.00991431458891507	0.963289544030831	0.983491232335743	60.4672508050543	-0.26516223456772	0.22835852503344	0.445599051225805	60.4672508050543	-0.343153684862085	0.130953730172254	0.206482761737294	60.4672508050543	0.332242945584403	0.109950696553116	0.56801268117398	60.4672508050543	0.177266801062016	0.392507361194591	0.849781095882041	60.4672508050543	0.134387960672095	0.528845864733506	0.662171580413924	60.4672508050543	-0.0990636818571377	0.659273138846582	0.728981988636084	60.4672508050543	0.1459431586985	0.491183812431303	NA	60.4672508050543	0.187181115650931
ENSG00000137992.10	DBT	chr1	100652475	100715390	-	62915	2494	139	90	92.3703703703704	FALSE	92.7684250810128	0.0874292587910043	0.647722888810973	0.768897662609747	92.7684250810128	0.0622627444255911	0.746307219556491	0.878422252549964	92.7684250810128	0.26891144255228	0.154772963707604	0.348649164157341	92.7684250810128	0.279517973074437	0.145322154568371	0.224482407066262	92.7684250810128	-0.134753021552942	0.487309149160775	0.823845975734432	92.7684250810128	-0.00356930811801815	0.984940607710723	0.998380568949924	92.7684250810128	0.519319516503869	0.00538103624625839	0.0190268318974184	92.7684250810128	0.948085013593633	3.07447787871714e-07	2.05529681000043e-06	92.7684250810128	-0.222182280343946	0.263716153664098	0.638794310041273	92.7684250810128	-0.0658320525436093
ENSG00000137996.8	RTCA	chr1	100731763	100758325	+	26562	3987	244	155	147.666666666667	FALSE	142.464952200113	0.212476270435957	0.14191707754086	0.292210145082339	142.464952200113	0.281669793948359	0.051158459183175	0.205794148676693	142.464952200113	0.19631251859084	0.175915861211575	0.377456916349636	142.464952200113	-0.210384533146385	0.169646959751488	0.254146010462199	142.464952200113	0.0642297004526983	0.659330807674865	0.896089258956273	142.464952200113	0.200796029227971	0.158413464205107	0.630507538593723	142.464952200113	0.154640652907575	0.290324402150767	0.432971380670622	142.464952200113	-0.188807922136175	0.223902261316022	0.304700850562249	142.464952200113	-0.148246569983259	0.316570276883011	0.681164837755481	142.464952200113	-0.0808737647203882
ENSG00000162694.9	EXTL2	chr1	101337943	101361554	-	23611	3273	187	114	121.222222222222	FALSE	119.493817676162	-0.0255852254615917	0.903800582662075	0.941609191246416	119.493817676162	0.0724977898011116	0.731338065729486	0.868081329834546	119.493817676162	-0.0333764411432943	0.874900503291016	0.941190815365155	119.493817676162	-0.0289944470110721	0.892437060463031	0.9227417986573	119.493817676162	-0.170134192934334	0.423918045123826	0.797775430967974	119.493817676162	0.263536580774305	0.202623721636007	0.690882743836282	119.493817676162	0.60052823799076	0.00367982815207703	0.0138475231162616	119.493817676162	0.581127081341754	0.00558006873834785	0.0129048449592978	119.493817676162	-0.144548967472742	0.505414492874432	0.800501215422236	119.493817676162	0.191038790973193
ENSG00000162695.7	SLC30A7	chr1	101361632	101447309	+	85677	1547	122	53	57.2962962962963	FALSE	55.014329628109	0.15388377287093	0.475707962142838	0.630351454680122	55.014329628109	-0.0597659050013548	0.786151423209842	0.901672675868389	55.014329628109	-0.0581426845752387	0.791309498436453	0.894244222681761	55.014329628109	-0.185814972729407	0.412417892113468	0.515492453777452	55.014329628109	-0.165955369345206	0.451382795601771	0.806685128423161	55.014329628109	-0.447923618184954	0.0437450669414076	0.352026337978819	55.014329628109	-0.526189957667797	0.0229395401827101	0.061341555255237	55.014329628109	-0.361118468999312	0.123855826616329	0.184936000338401	55.014329628109	-0.319839142216136	0.154369736328792	NA	55.014329628109	-0.388157713183599
ENSG00000117543.15	DPH5	chr1	101455179	101491644	-	36465	7108	485	257	263.259259259259	FALSE	252.779707218172	-0.0361705386893132	0.788385931247649	0.86707358896758	252.779707218172	-0.0536545331053852	0.691433100286559	0.842846092116181	252.779707218172	-0.229940509647479	0.0914157603199713	0.246759813257104	252.779707218172	-0.623002481976048	1.08304192145318e-05	6.83704925799419e-05	252.779707218172	-0.106220096004967	0.431084897279493	0.798679544153384	252.779707218172	-0.116758873312392	0.38277148018734	0.846379739485325	252.779707218172	-0.15405477917562	0.257781200343174	0.398068736210167	252.779707218172	-0.336658207567903	0.0164495938747406	0.0328877379161577	252.779707218172	-0.070049557315654	0.61042555559166	0.85618854847296	252.779707218172	-0.0631043402070064
ENSG00000185946.11	RNPC3	chr1	104068313	104097861	+	29548	1810	114	62	67.037037037037	FALSE	69.3422628698327	0.221414435857002	0.339782800242112	0.506339880296451	69.3422628698327	0.00297621933529043	0.99001138704435	0.996558101689485	69.3422628698327	0.449232350800095	0.0487902590015284	0.162451955879509	69.3422628698327	1.21977015658339	2.79864786154488e-08	3.23270088779253e-07	69.3422628698327	0.33242107010929	0.14618027854905	0.618732991969225	69.3422628698327	0.196897357349402	0.387340976450397	0.848077641620209	69.3422628698327	0.930678470872794	2.64678635325583e-05	0.000218530844502774	69.3422628698327	1.59953674649193	1.76827558551158e-13	3.61929470792239e-12	69.3422628698327	0.111006634252288	0.63398917603129	NA	69.3422628698327	0.193921138014112
ENSG00000198890.6	PRMT6	chr1	107599267	107601916	+	2649	552	40	20	20.4444444444444	FALSE	19.0268348889059	0.0538262088494397	0.884060794643042	0.928452390912747	19.0268348889059	-0.0726447837976677	0.846024041772881	0.928931233059593	19.0268348889059	-0.0248917275643901	0.946629487276142	0.978304904276628	19.0268348889059	-0.76359603239886	0.0617807697090756	0.111817872838291	19.0268348889059	-0.135019410790619	0.717317489926262	0.917703659348225	19.0268348889059	-0.110210314732831	0.763926069619957	0.971981190190416	19.0268348889059	-0.399198330711753	0.301530713344408	0.443772870519004	19.0268348889059	-1.4160883339272	0.00201043179558569	0.00527524079858767	19.0268348889059	-0.188845619640059	0.621215411887503	NA	19.0268348889059	-0.0375655309351631
ENSG00000085491.11	SLC25A24	chr1	108676658	108743471	-	66813	6255	430	246	231.666666666667	FALSE	218.228571862075	-0.529664720372126	0.00836567749182362	0.0598696253493538	218.228571862075	-0.443970306947075	0.0268918061786482	0.14265648347661	218.228571862075	0.0738234217837223	0.708778057894132	0.843821845205171	218.228571862075	-0.658039965341345	0.00122717697937363	0.00406402153392106	218.228571862075	-0.34285717793539	0.0856158612892965	0.540477565369867	218.228571862075	0.11203057758478	0.568421057222193	0.926576156488462	218.228571862075	0.0297900963280227	0.880494639114947	0.925835546705735	218.228571862075	-0.627725308035265	0.00218391829544554	0.00566832046742598	218.228571862075	0.186807542436736	0.360143435081804	0.710286798683968	218.228571862075	0.556000884531855
ENSG00000134186.7	PRPF38B	chr1	109234945	109244425	+	9480	16142	911	581	597.851851851852	FALSE	588.280468317432	0.346304082528406	0.0268492877849838	0.108680789718722	588.280468317432	-0.109810579064428	0.486785409221923	0.705216857980046	588.280468317432	0.0758131835277501	0.629677276447054	0.795721680922991	588.280468317432	0.271173322653428	0.0846676328745124	0.14547975921828	588.280468317432	0.336907956172921	0.0311936362789207	0.395264764310002	588.280468317432	0.331263940494254	0.0336252457214979	0.304258871601741	588.280468317432	0.398798869094063	0.0108342542103035	0.0338747345900526	588.280468317432	0.581034351879916	0.000213481424135205	0.000739971613746202	588.280468317432	-0.00939612635548504	0.952153223588242	0.987431112481775	588.280468317432	0.441074519558682
ENSG00000116266.6	STXBP3	chr1	109289296	109352148	+	62852	830	55	28	30.7407407407407	FALSE	29.7750066977201	-0.696016055117792	0.0242772033285293	0.103001802600658	29.7750066977201	-0.50522387256916	0.0963563064578313	0.299894973853046	29.7750066977201	-0.140562874164765	0.630122995333764	0.796037216066712	29.7750066977201	-0.353317344732432	0.246622759099367	0.34387513190279	29.7750066977201	-0.359101234607272	0.224913637779056	0.677454552006019	29.7750066977201	0.0174285136543754	0.950693953916182	0.99467197405541	29.7750066977201	-0.0361294419928741	0.901148535004626	0.93861923439319	29.7750066977201	0.200336927647376	0.493474629708353	0.581070085296103	29.7750066977201	0.33691482051052	0.300031511996844	NA	29.7750066977201	0.522652386223535
ENSG00000162641.14	AKNAD1	chr1	109358520	109506106	-	147586	891	54	29	33	FALSE	32.5370618542265	-0.191911770445524	0.487735558039512	0.639795818587707	32.5370618542265	-0.131302797915398	0.634315563301147	0.806655432255901	32.5370618542265	0.161801584065812	0.542171816074055	0.736079177424001	32.5370618542265	0.305774211705295	0.253157042608863	0.350603380932269	32.5370618542265	-0.344963409953008	0.217633308256151	0.675115380711018	32.5370618542265	0.474087734920203	0.0587992097223146	0.40618070504315	32.5370618542265	0.909551521763593	0.000255468426033971	0.00148841881483078	32.5370618542265	0.652271792145154	0.0126567619617134	0.0262739864668958	32.5370618542265	-0.153051639507484	0.607559816059167	NA	32.5370618542265	0.605390532835601
ENSG00000121957.8	GPSM2	chr1	109417972	109477167	+	59195	6421	495	216	237.814814814815	FALSE	224.92447047526	-0.388273871731603	0.0190156490119737	0.0909311029612527	224.92447047526	-0.208978850243849	0.204345291895114	0.449718887320747	224.92447047526	-0.326917048333885	0.0479244360847914	0.16027579578353	224.92447047526	-0.40613175586183	0.0153340089684836	0.0346806181841005	224.92447047526	-0.149506233454447	0.361072200933848	0.765031916319207	224.92447047526	0.074037939230897	0.646590354973132	0.940156927223108	224.92447047526	-0.250444261108221	0.12946529695464	0.238887037228723	224.92447047526	-0.306312473363484	0.0685175649255851	0.112417337578783	224.92447047526	0.238767638277156	0.155883195004339	0.556638357983752	224.92447047526	0.283016789474746
ENSG00000121940.11	CLCC1	chr1	109472130	109506111	-	33981	2264	129	86	83.8518518518518	FALSE	81.4686713777085	-0.0223835515250361	0.895401372576994	0.936027372012127	81.4686713777085	-0.104703952101002	0.544199600406566	0.745646041771884	81.4686713777085	-0.063629294677005	0.710322389376432	0.844972970726744	81.4686713777085	-0.0926905253938763	0.598713733451237	0.686235201004165	81.4686713777085	0.0375756088325657	0.823218386496451	0.954121221367515	81.4686713777085	0.0832654429149918	0.612876878509549	0.934212023933782	81.4686713777085	0.164633006613395	0.328450103454003	0.471473353567074	81.4686713777085	0.295361374661954	0.0846627888568271	0.134081832674008	81.4686713777085	0.0599591603576018	0.732522548895512	0.906812588232872	81.4686713777085	0.187969395015994
ENSG00000197780.5	TAF13	chr1	109605108	109618624	-	13516	2570	244	87	95.1851851851852	FALSE	89.9548673913727	-0.211508807024014	0.313317364630836	0.479974352182028	89.9548673913727	-0.70342537537654	0.00118945576646525	0.0193023358561789	89.9548673913727	-0.581841608383431	0.00674410929603152	0.038691071773571	89.9548673913727	-0.6086576321863	0.00533717953097738	0.0140514744938686	89.9548673913727	-0.509166729659326	0.0167255250024461	0.304495916508157	89.9548673913727	-0.113722597143061	0.581485287597884	0.930830154789331	89.9548673913727	-0.460661743775853	0.0313142137514213	0.0786002271762298	89.9548673913727	-0.329202901197522	0.128566313117758	0.190680881262602	89.9548673913727	-0.297657922635312	0.173310110093961	0.562638007794361	89.9548673913727	0.589702778233479
ENSG00000215717.5	TMEM167B	chr1	109632425	109639556	+	7131	5031	296	179	186.333333333333	FALSE	182.872134978304	-0.0526155360673845	0.705563865705855	0.809490667385784	182.872134978304	0.0385263930313718	0.781350911123805	0.898612657254009	182.872134978304	0.0622107664586749	0.652817321150221	0.811618360460461	182.872134978304	0.404700722381536	0.00314985146279661	0.00901137784027836	182.872134978304	-0.0439511634332784	0.751216506863295	0.92950465626828	182.872134978304	-0.09474595682865	0.490052790716882	0.8976172760633	182.872134978304	0.154000116651849	0.264545630052877	0.405548780317673	182.872134978304	0.408322856650177	0.00321145839955084	0.00796807861472203	182.872134978304	0.0086643726341061	0.951695092682553	0.987431112481775	182.872134978304	-0.133272349860022
ENSG00000031698.8	SARS	chr1	109756540	109780791	+	24251	9555	552	349	353.888888888889	FALSE	352.876048195218	0.358134122289058	0.0658644817716971	0.181479072417807	352.876048195218	0.116792443286258	0.55072908882723	0.749349843427166	352.876048195218	0.160042923464473	0.412946129328467	0.631810510728587	352.876048195218	0.345426684279525	0.077355773597787	0.135016143628141	352.876048195218	0.23957439195375	0.219164136454927	0.676020243535115	352.876048195218	0.0296930372790738	0.878969697876695	0.98474254093816	352.876048195218	0.437672492330692	0.0245966465042476	0.0647838047551356	352.876048195218	0.536335493096678	0.00609867309105061	0.0139358965859409	352.876048195218	-0.118559730335308	0.543681237166614	0.820661903914195	352.876048195218	-0.0870994060071839
ENSG00000134222.12	PSRC1	chr1	109822178	109825808	-	3630	2903	243	101	107.518518518519	FALSE	101.918237089722	-0.227838773629045	0.229759779778578	0.393752864794074	101.918237089722	-0.230555371929373	0.225644824912465	0.473157004603761	101.918237089722	-0.469521961773519	0.0149414323608472	0.0685571473127904	101.918237089722	-0.514218883057271	0.00891346624468146	0.0216847370498081	101.918237089722	-0.205972671737342	0.275625996752423	0.706533658670266	101.918237089722	-0.349670636901961	0.0634254094797926	0.421543801287541	101.918237089722	-0.624884117811703	0.00143584586733475	0.00643740054049094	101.918237089722	-0.707704453071461	0.000479303514285985	0.00151509845289887	101.918237089722	0.021866101891703	0.910695422400903	0.970370621019766	101.918237089722	-0.119115264972589
ENSG00000134243.7	SORT1	chr1	109852192	109940573	-	88381	1866	106	65	69.1111111111111	FALSE	68.6932581037581	-0.23316757047956	0.238270892010633	0.402347692819052	68.6932581037581	-0.362985878786559	0.0723324343443857	0.255251367478502	68.6932581037581	0.29054076790634	0.121437803150085	0.298956443210128	68.6932581037581	0.472865400787355	0.0119531579692174	0.0280120647867136	68.6932581037581	-0.243824956881522	0.214792036878703	0.673032172884628	68.6932581037581	-0.0998378021752576	0.598937986659827	0.933439890287506	68.6932581037581	0.539445889530442	0.00348089523772742	0.0132720682581846	68.6932581037581	0.688643540317665	0.000231176834678287	0.000793645730845736	68.6932581037581	-0.0106573864019616	0.959317888222907	NA	68.6932581037581	0.263148076611302
ENSG00000143106.8	PSMA5	chr1	109941653	109969062	-	27409	2131	209	81	78.9259259259259	FALSE	71.6965519907127	-1.02656479095604	0.0108761708903773	0.0680396343819957	71.6965519907127	-0.799183899666536	0.0463646130258886	0.195080014865274	71.6965519907127	-0.505073838767427	0.204773964928395	0.413786843699777	71.6965519907127	-1.50392602621759	0.000274309982098764	0.00113586214115572	71.6965519907127	-0.599960931212733	0.132251295294304	0.602330555788065	71.6965519907127	-0.0402074927616525	0.918641720490977	0.992482383896999	71.6965519907127	-0.218693438851409	0.581353159192148	0.706362122498412	71.6965519907127	-1.07831368843956	0.00842078283886528	0.0185248623238453	71.6965519907127	0.426603859743312	0.296906957799394	NA	71.6965519907127	0.758976406904884
ENSG00000174151.10	CYB561D1	chr1	110036674	110045554	+	8880	1961	140	75	72.6296296296296	FALSE	70.70242440175	0.421395864806094	0.0419173539837427	0.139514036028548	70.70242440175	0.0414135149049554	0.845981960576533	0.928931233059593	70.70242440175	-0.225925224128865	0.298616656467679	0.524389592170774	70.70242440175	-0.427145528481144	0.0589154121717218	0.107604723198846	70.70242440175	0.123497318146222	0.557288013035064	0.854885115336801	70.70242440175	0.0572330490935546	0.783875491109524	0.974190565515725	70.70242440175	-0.280768552717506	0.201260859307072	0.33178971200479	70.70242440175	0.291495906353384	0.174650548562695	0.246074741321013	70.70242440175	-0.297898546659871	0.157611742539779	NA	70.70242440175	0.0158195341885992
ENSG00000065135.7	GNAI3	chr1	110091233	110136975	+	45742	11496	767	414	425.777777777778	FALSE	411.650113342917	0.0323779575305954	0.803967617361746	0.877490685092611	411.650113342917	-0.0311156570396591	0.81215900022271	0.91514249353035	411.650113342917	0.042254003890467	0.746090034692046	0.868909018643244	411.650113342917	-0.202154984214486	0.127887571292739	0.202463200777058	411.650113342917	-0.0403227834763634	0.75746093559384	0.932238637697015	411.650113342917	0.0587624158433068	0.649715700894092	0.941168052014688	411.650113342917	0.124303103362415	0.34050030720805	0.483969217805333	411.650113342917	-0.207340859998262	0.121481323604759	0.18211631271785	411.650113342917	-0.0727007410069588	0.582071461949264	0.841398219786431	411.650113342917	0.0898780728829659
ENSG00000116337.11	AMPD2	chr1	110158726	110174673	+	15947	5342	301	209	197.851851851852	FALSE	196.662656555644	0.33330107226222	0.0152024573936262	0.0807586380932525	196.662656555644	0.17679177524413	0.203373184325374	0.449120920063033	196.662656555644	0.140508414765753	0.312321883896257	0.538738289489336	196.662656555644	0.713889768230834	1.59259112589895e-07	1.56302479861859e-06	196.662656555644	0.117079617713986	0.398459959385434	0.789400971405941	196.662656555644	-0.499919919667666	0.000464650097971573	0.0148292218304483	196.662656555644	-0.509082423595582	0.000535891570508603	0.00279865312913493	196.662656555644	0.422144263663722	0.00255468854057371	0.00652646046668357	196.662656555644	-0.216221454548234	0.121211916586688	0.53094115018138	196.662656555644	-0.676711694911796
ENSG00000168765.11	GSTM4	chr1	110198703	110208118	+	9415	1901	104	69	70.4074074074074	FALSE	69.6879315234413	0.0848870127079408	0.701499636003428	0.806191299472065	69.6879315234413	0.404819619974172	0.0623668812204012	0.232651284366722	69.6879315234413	0.173127913022268	0.431981917064173	0.647371857276866	69.6879315234413	0.536356813070703	0.0138734154951088	0.031862265810595	69.6879315234413	0.290772584853424	0.181129814043371	0.646517416728662	69.6879315234413	-0.0378482838508625	0.863078299331815	0.983785848380802	69.6879315234413	-0.037392726129996	0.868117341343549	0.918424448171561	69.6879315234413	0.394014631761276	0.0770551443580575	0.123993310725188	69.6879315234413	0.205885572145483	0.35580382017417	NA	69.6879315234413	-0.442667903825034
ENSG00000134202.6	GSTM3	chr1	110276554	110284384	-	7830	6067	328	235	224.703703703704	FALSE	228.630508674712	0.00680488366941853	0.975264462457192	0.98430163990118	228.630508674712	-0.0983228612469076	0.655640506754479	0.821323449697174	228.630508674712	0.488964524359931	0.0242141628904656	0.0986074865912771	228.630508674712	0.793629335779417	0.000247154651314664	0.00103445982570451	228.630508674712	0.00448922532726139	0.983662098213783	0.994822813420933	228.630508674712	0.0527112368265535	0.808771241626778	0.976230426249868	228.630508674712	0.929122831524024	1.60717860546635e-05	0.000141750849982636	228.630508674712	1.01710380419906	2.59652817016335e-06	1.43886065866865e-05	228.630508674712	-0.00231565834215714	0.991662535792591	0.998425677416217	228.630508674712	0.151034098073461
ENSG00000184371.9	CSF1	chr1	110452864	110473614	+	20750	2856	321	81	105.777777777778	FALSE	96.6832709644617	-1.41321954845613	0.0327450354421148	0.122148904937101	96.6832709644617	-0.251894236108298	0.700940216479037	0.848193024408219	96.6832709644617	0.661408264241129	0.311426405071512	0.538610668098893	96.6832709644617	-0.858329527454714	0.193193679631464	0.282400328648741	96.6832709644617	-0.469271559093558	0.474653270714342	0.818672384656823	96.6832709644617	-0.304125105814387	0.642476328362563	0.939264521967062	96.6832709644617	-0.663800010356542	0.312890600140043	0.45582050742295	96.6832709644617	-1.10857692658707	0.094437295597094	0.147261342048527	96.6832709644617	0.943947989362571	0.155398604327337	0.556638357983752	96.6832709644617	-0.0522308697060887
ENSG00000168710.13	AHCYL1	chr1	110527308	110566357	+	39049	56747	3166	2056	2101.74074074074	FALSE	2096.49220565994	-0.101192673948575	0.248899401645361	0.412943773401938	2096.49220565994	-0.0117151684176226	0.893729888856435	0.950422121717377	2096.49220565994	0.215471754718653	0.0136261109338562	0.0643024084978306	2096.49220565994	0.71012135944326	3.3056632603597e-16	1.38950733241559e-14	2096.49220565994	-0.138979220909689	0.113283165777615	0.572700363034668	2096.49220565994	-0.148472485375175	0.0896368476982986	0.496082669631496	2096.49220565994	0.266256123373918	0.00230405229154473	0.00957743299384512	2096.49220565994	0.568472601824373	7.83611947603671e-11	9.86397420586622e-10	2096.49220565994	-0.0377865469611145	0.669306238567388	0.884293815199403	2096.49220565994	-0.136757316957552
ENSG00000143093.10	STRIP1	chr1	110574199	110617263	+	43064	6205	452	213	229.814814814815	FALSE	216.318843819962	-0.0327275872008234	0.868045320685163	0.918680972734513	216.318843819962	0.12385677844446	0.528338448671597	0.736516332680706	216.318843819962	-0.0158437015992916	0.935904067449826	0.972611024577763	216.318843819962	-0.478675625862903	0.0175336247725611	0.0388498957740188	216.318843819962	0.224460784160146	0.251051760241229	0.693710237689175	216.318843819962	-0.00266775448969284	0.989121782862293	0.998910881704753	216.318843819962	-0.371082929887648	0.0629676907997161	0.136432635559757	216.318843819962	-0.636727423133666	0.00185766460720839	0.00491328910997994	216.318843819962	0.25718837136097	0.193316021163284	0.579986585022793	216.318843819962	-0.126524532934153
ENSG00000116396.9	KCNC4	chr1	110753965	110825722	+	71757	718	49	25	26.5925925925926	FALSE	25.8507691355627	0.638324632967269	0.0476083464494332	0.150099049188531	25.8507691355627	0.612519556430204	0.0585196830396009	0.223629452707495	25.8507691355627	-0.516400080395635	0.148611776288513	0.339768553005603	25.8507691355627	0.312936785420197	0.351569366502489	0.45624596854698	25.8507691355627	0.713709068913802	0.025609301422115	0.364150743159018	25.8507691355627	0.0977552020603842	0.766306376606303	0.971981190190416	25.8507691355627	-1.79289871448975	4.71041899107516e-05	0.000358249606761648	25.8507691355627	0.0390324719354772	0.911156759334975	0.932474797528442	25.8507691355627	0.0753844359465331	0.811256702259406	NA	25.8507691355627	-0.51476435436982
ENSG00000162775.10	RBM15	chr1	110881128	110889299	+	8171	2800	182	97	103.703703703704	TRUE	100.263758533428	-0.112468384744675	0.475470629349674	0.630317672360572	100.263758533428	-0.296258151175383	0.066355410215349	0.242178979172242	100.263758533428	-0.317905172324448	0.0486349077335927	0.16218537149395	100.263758533428	-0.364370853917046	0.0282528636121782	0.0580622288924731	100.263758533428	-0.202287529120059	0.200696853295166	0.663428796444611	100.263758533428	0.0152954731304915	0.920114026176454	0.992482383896999	100.263758533428	0.230330451951171	0.1346433217413	0.246279240807638	100.263758533428	0.0396298204593848	0.805885709368269	0.849769598339008	100.263758533428	-0.0898191443753843	0.586327496262107	0.84384229195239	100.263758533428	0.311553624305875
ENSG00000134248.9	LAMTOR5	chr1	110943871	110950564	-	6693	6764	472	258	250.518518518519	FALSE	243.723653279713	0.0261516567603181	0.825203863247689	0.891410516435418	243.723653279713	0.0279921948701993	0.813671271970528	0.915924931491841	243.723653279713	-0.147627791039652	0.218633188818489	0.432101419277275	243.723653279713	0.288695470309738	0.0145646426642507	0.0332107768822038	243.723653279713	-0.15343876824399	0.19892466151649	0.662339184036936	243.723653279713	-0.233847401313631	0.048500955716516	0.372157377924505	243.723653279713	-0.432683422335366	0.000455849655589962	0.00243072802117494	243.723653279713	-0.0214529781453632	0.860770947915426	0.893089684655275	243.723653279713	-0.179590425004308	0.141808624037567	0.550065052524854	243.723653279713	-0.261839596183831
ENSG00000121931.11	LRIF1	chr1	111489807	111506701	-	16894	2877	166	107	106.555555555556	FALSE	105.884821679424	0.667470912780513	0.000208929282996139	0.00818642840828301	105.884821679424	0.525377579476155	0.00401798564856018	0.0433328940345971	105.884821679424	0.71395371481181	7.06393584995622e-05	0.00101281090214763	105.884821679424	0.766397260647868	2.4941809986376e-05	0.000140841138042334	105.884821679424	0.641672470837342	0.000354313438161069	0.0267817447073152	105.884821679424	0.777720439272443	9.73902825025367e-06	0.000559474709549573	105.884821679424	1.10733613582136	3.02432511195781e-10	9.51117134662061e-09	105.884821679424	1.12141848983788	3.89636868738277e-10	4.37174596083038e-09	105.884821679424	-0.0257984419431709	0.88389249953436	0.96199136781157	105.884821679424	0.252342859796288
ENSG00000156171.10	DRAM2	chr1	111659955	111682838	-	22883	1871	121	65	69.2962962962963	FALSE	67.5082664045109	-0.0507416392665294	0.835073449566832	0.896564654238399	67.5082664045109	-0.188302238031831	0.445956902302326	0.675362148882098	67.5082664045109	0.167955083060173	0.484981959243528	0.691399065512065	67.5082664045109	0.34059364495145	0.157778675899873	0.239615588690377	67.5082664045109	-0.186845027868741	0.446019845077972	0.80583839300588	67.5082664045109	0.317588004129827	0.176589882385939	0.659304599878526	67.5082664045109	0.637855952544484	0.00666798919996857	0.0226301941457776	67.5082664045109	0.474308217015169	0.0496292572651456	0.0852242546539975	67.5082664045109	-0.136103388602212	0.589558325729356	NA	67.5082664045109	0.505890242161658
ENSG00000134255.9	CEPT1	chr1	111682249	111727724	+	45475	2275	146	83	84.2592592592593	FALSE	83.2186196301555	0.273235194862067	0.15946897942873	0.312803140390933	83.2186196301555	-0.0282858630228869	0.887220402292449	0.948149303515717	83.2186196301555	0.0941506037371765	0.632793198402401	0.797571645537782	83.2186196301555	0.353810209623478	0.0715449745680081	0.126476256226453	83.2186196301555	-0.0909623520311552	0.647278145598153	0.890780195001213	83.2186196301555	-0.0794845792692585	0.684639352437817	0.950159011105921	83.2186196301555	0.166656563511979	0.397426233723278	0.542656739359385	83.2186196301555	0.456494735552768	0.0206105520077574	0.0399732448010006	83.2186196301555	-0.364197546893222	0.0700210684102998	0.496317242611233	83.2186196301555	-0.0511987162463715
ENSG00000116455.9	WDR77	chr1	111982512	111991998	-	9486	2986	247	105	110.592592592593	FALSE	102.013752515975	-0.370889793699782	0.0226985845843828	0.100047930109272	102.013752515975	-0.251742777904173	0.119796319836156	0.337145040423916	102.013752515975	-0.58735770217903	0.000408498272429438	0.00417559859255571	102.013752515975	-1.23754240969527	1.57226827098155e-11	3.44738821655166e-10	102.013752515975	0.109818375204923	0.483366542989421	0.822750193298569	102.013752515975	-0.109283429912533	0.486165784246179	0.896568514171349	102.013752515975	-1.07097112317195	1.22972488783295e-09	3.33224508127564e-08	102.013752515975	-1.42164068950689	1.5079228317634e-13	3.13859203896262e-12	102.013752515975	0.480708168904706	0.00361922473498044	0.242400707616501	102.013752515975	0.142459347991641
ENSG00000116459.6	ATP5F1	chr1	111991486	112005395	+	13909	20025	1416	717	741.666666666667	FALSE	705.299868926014	-0.0200104510738148	0.876429317824494	0.923910408235685	705.299868926014	-0.0396066602258111	0.758542448885367	0.886165981839101	705.299868926014	-0.267401821259351	0.0387424810618685	0.137610865338055	705.299868926014	-0.454885200538593	0.000497542062618316	0.00188619443624374	705.299868926014	-0.0357417144135816	0.781123265493339	0.939918251412722	705.299868926014	-0.069677185709323	0.586985298081837	0.931805356213003	705.299868926014	-0.26937224689967	0.0375937706232647	0.091098290624486	705.299868926014	-0.857392478941005	1.22291304920159e-10	1.48629643793654e-09	705.299868926014	-0.0157312633397669	0.903347870747223	0.96808668915321	705.299868926014	-0.0300705254835119
ENSG00000116473.10	RAP1A	chr1	112084840	112259313	+	174473	3557	258	150	131.740740740741	FALSE	123.516749062035	-0.609719575446224	0.102363981006201	0.239867762044099	123.516749062035	-0.26867475819589	0.469184577721631	0.691445189450768	123.516749062035	0.295023831948675	0.422873356158442	0.640066697701966	123.516749062035	-0.469538719618856	0.209312655779768	0.301159985782979	123.516749062035	-0.155499073452399	0.674302287508902	0.900846947513831	123.516749062035	0.361324779148811	0.32465398062633	0.813003008153759	123.516749062035	0.54104374477499	0.140820433157081	0.254520708245404	123.516749062035	-0.334229629290459	0.372073150070016	0.46401499401792	123.516749062035	0.454220501993825	0.226792112366387	0.611978715909298	123.516749062035	0.629999537344701
ENSG00000064703.7	DDX20	chr1	112297867	112310638	+	12771	1949	169	61	72.1851851851852	FALSE	67.8545250973345	-0.405041006161661	0.0607545661364326	0.172403480800503	67.8545250973345	-0.667037161642034	0.00261482381581891	0.0328933384246884	67.8545250973345	-0.662368160806177	0.00272229498116264	0.0194672330727622	67.8545250973345	-0.901808809153693	9.56734901107718e-05	0.000454726124812201	67.8545250973345	-0.178082251061271	0.400356945177306	0.790262401844444	67.8545250973345	-0.0295349752441579	0.886791984169791	0.985449103819135	67.8545250973345	-0.18253408416301	0.393213351030617	0.53834751645693	67.8545250973345	-0.627746317913131	0.00592257253402623	0.0135803106774093	67.8545250973345	0.22695875510039	0.307496857729846	NA	67.8545250973345	0.637502186397876
ENSG00000143079.10	CTTNBP2NL	chr1	112938803	113006078	+	67275	5176	282	190	191.703703703704	FALSE	191.976996318358	0.156019738225454	0.308765942650736	0.475816736097097	191.976996318358	0.250510444035472	0.101016591747647	0.307350245590259	191.976996318358	1.02456113484199	2.1235514536762e-12	1.98898292133998e-10	191.976996318358	1.14300272521743	5.97762478898785e-15	2.18259291553849e-13	191.976996318358	0.218336619027144	0.150960716686808	0.621139498015356	191.976996318358	0.523186789455668	0.000390145172369113	0.0127828173015386	191.976996318358	1.01849405149369	3.35469656004604e-12	1.5214431714693e-10	191.976996318358	0.927043399681078	5.62146588675943e-10	6.10847056068172e-09	191.976996318358	0.0623168808016896	0.68779784420604	0.88797553352451	191.976996318358	0.272676345420196
ENSG00000007341.14	ST7L	chr1	113066140	113163447	-	97307	1260	68	46	46.6666666666667	FALSE	45.6971835275791	0.201968844743208	0.3936117211813	0.557535793312333	45.6971835275791	-0.116283632162687	0.635251804426435	0.807369439342565	45.6971835275791	-0.0632625342396162	0.794680021843968	0.895717167852122	45.6971835275791	0.125973632165193	0.605191386753211	0.691635832845148	45.6971835275791	-0.0850352467398761	0.725074556379475	0.920818452696484	45.6971835275791	0.0314487672417109	0.893643045895409	0.986413149281816	45.6971835275791	0.379520095054242	0.106138802547414	0.205112819365568	45.6971835275791	0.386997116392548	0.108354894447878	0.165226353823636	45.6971835275791	-0.287004091483084	0.244202748754642	NA	45.6971835275791	0.147732399404398
ENSG00000116489.8	CAPZA1	chr1	113161795	113214241	+	52446	18575	1114	701	687.962962962963	FALSE	664.452384654858	-0.241056153158208	0.0565831840816646	0.165936020274292	664.452384654858	-0.187838037307564	0.137320035725955	0.363120212108147	664.452384654858	0.183453408521377	0.142925363676845	0.331750413329206	664.452384654858	-0.158815762099476	0.211042669591552	0.30299145016168	664.452384654858	-0.113559265807707	0.367034601886939	0.768679635946843	664.452384654858	0.1798353816426	0.148921695286318	0.614300041799391	664.452384654858	0.472940880807127	0.000148501611233288	0.000946478094672519	664.452384654858	0.0609025687630598	0.631148899530521	0.704483169333484	664.452384654858	0.127496887350501	0.318307048870812	0.681861283175529	664.452384654858	0.367673418950164
ENSG00000155363.14	MOV10	chr1	113215763	113243368	+	27605	4538	251	170	168.074074074074	FALSE	166.876049321216	0.799707049342909	3.34596944127288e-05	0.00227025343901169	166.876049321216	1.30177449244736	7.05151681140174e-12	1.08505214935444e-09	166.876049321216	0.911679213323951	2.08061507804633e-06	5.12247432215005e-05	166.876049321216	0.940749914895698	1.15800474180528e-06	9.45019017408273e-06	166.876049321216	0.724808209433894	0.000172900067721243	0.0148987988355395	166.876049321216	0.892819143581608	2.78741743770598e-06	0.00017924758254263	166.876049321216	0.586377348275206	0.00266463010491311	0.0106647085991808	166.876049321216	0.704805121376891	0.000349799101129212	0.00114783657822941	166.876049321216	-0.0748988399090149	0.693489158129333	0.890065014208547	166.876049321216	-0.408955348865748
ENSG00000155366.12	RHOC	chr1	113243728	113250056	-	6328	11901	697	429	440.777777777778	FALSE	447.708521211937	0.420607916845252	0.0097070761965246	0.0636574395627492	447.708521211937	0.436338543862399	0.00734444048876842	0.0637004910992115	447.708521211937	0.909421411109301	1.66103017327363e-08	7.4161124368388e-07	447.708521211937	1.39066041851443	4.41411068110832e-18	2.31929217921405e-16	447.708521211937	0.160383469905451	0.326724956063064	0.746092831254031	447.708521211937	0.177781123665601	0.274362476198677	0.773510925489562	447.708521211937	0.723554387796481	7.8251869570316e-06	7.63642536905337e-05	447.708521211937	0.858713812197009	1.27852237019553e-07	9.2245468995505e-07	447.708521211937	-0.2602244469398	0.111745010749503	0.530161071357132	447.708521211937	-0.258557420196797
ENSG00000155380.7	SLC16A1	chr1	113454469	113499635	-	45166	11448	809	404	424	FALSE	404.183654397343	-0.146230586466291	0.185076546093551	0.343817045698537	404.183654397343	-0.126528973899085	0.25212798131152	0.503846663952079	404.183654397343	-0.209548621001851	0.0585914849315665	0.182796099078678	404.183654397343	-0.348218104028794	0.00205968075264305	0.00634093213487857	404.183654397343	0.0940379461394172	0.388071525882945	0.781859326287898	404.183654397343	0.0965820112199643	0.371690262302582	0.84053300589993	404.183654397343	-0.28047479005992	0.0119546714844768	0.0366067990662767	404.183654397343	-0.552630817471888	1.85963031547874e-06	1.06474647365317e-05	404.183654397343	0.240268532605708	0.0312390291717272	0.456499461396257	404.183654397343	0.223110985119049
ENSG00000198799.7	LRIG2	chr1	113615831	113674882	+	59051	1210	89	44	44.8148148148148	FALSE	43.1731773086024	-0.239649542625619	0.388078465189638	0.552739195791589	43.1731773086024	0.211879159903439	0.429593296950817	0.662219220004506	43.1731773086024	0.0477904120569145	0.860095012580677	0.932960564376597	43.1731773086024	-0.360521881984133	0.210502781888125	0.302451654333998	43.1731773086024	0.170960529008496	0.522043120073834	0.838167610522868	43.1731773086024	0.158814385133309	0.546976972465333	0.918596226614161	43.1731773086024	0.53673261325155	0.0411439853402504	0.0976418952566615	43.1731773086024	0.709553555280746	0.00747667325425233	0.0166951265695497	43.1731773086024	0.410610071634115	0.144894725848419	NA	43.1731773086024	-0.0530647747701305
ENSG00000081026.14	MAGI3	chr1	113933371	114228545	+	295174	4554	368	164	168.666666666667	FALSE	159.221645402239	-0.548520616902068	0.0115590543322108	0.0703941683698635	159.221645402239	-0.505237106718353	0.0200344724491324	0.120465026745347	159.221645402239	0.00194794085693476	0.992723500109223	0.996763819210068	159.221645402239	-0.348625162834303	0.108917215875949	0.178784589597634	159.221645402239	-0.428468473267215	0.0472499116414152	0.457117875357986	159.221645402239	-0.365387596870451	0.0880378864229368	0.492761337250178	159.221645402239	-0.159686810855363	0.457581577820909	0.598964067459026	159.221645402239	-0.575216525518917	0.00933491089742231	0.0202463949667979	159.221645402239	0.120052143634852	0.58820300040782	0.845890497894866	159.221645402239	0.139849509847901
ENSG00000116793.11	PHTF1	chr1	114239453	114302111	-	62658	1715	119	65	63.5185185185185	FALSE	60.939367446345	-0.279009899876727	0.151127290795537	0.302289662206394	60.939367446345	0.0378646582044037	0.840817128661185	0.927268126523084	60.939367446345	-0.139986897000918	0.465023524759307	0.67619097415642	60.939367446345	-0.358151248537765	0.0765667019021903	0.133910142133382	60.939367446345	-0.0843468940049707	0.655104981047624	0.894263215678116	60.939367446345	0.195608279166857	0.278902251858872	0.776295055322157	60.939367446345	0.027017328234559	0.886631623955011	0.929340068558609	60.939367446345	-0.0604253767408698	0.760236695061969	0.812270254352014	60.939367446345	0.194663005871756	0.335680624089523	NA	60.939367446345	0.157743620962453
ENSG00000081019.9	RSBN1	chr1	114304454	114355098	-	50644	4595	276	169	170.185185185185	FALSE	165.078341526262	-0.124915984252955	0.445839526027173	0.602351708337433	165.078341526262	-0.300817606138716	0.0702884438737948	0.250797317126497	165.078341526262	0.095984840418952	0.553543748044401	0.744480486483315	165.078341526262	0.204939406791668	0.208427426715538	0.300237234371078	165.078341526262	-0.0331739965680821	0.838277484126202	0.960267970633278	165.078341526262	0.0250431479216256	0.875964694753869	0.98474254093816	165.078341526262	0.216762453771011	0.179611170630171	0.30293784641225	165.078341526262	0.113218359169306	0.493903504531044	0.581431441661401	165.078341526262	0.0917419876848727	0.583084478288902	0.84176632094718	165.078341526262	0.325860754060341
ENSG00000134262.8	AP4B1	chr1	114437370	114447823	-	10453	1016	64	36	37.6296296296296	FALSE	35.6247428788401	0.15614493369098	0.534659659653098	0.679121799414909	35.6247428788401	-0.149024795286276	0.566787155275835	0.762768220679661	35.6247428788401	-0.107025770316115	0.678581893267662	0.827736847548971	35.6247428788401	-0.343208435050888	0.206625918869898	0.298490451450447	35.6247428788401	0.199048350377768	0.424701742394281	0.798179915858564	35.6247428788401	0.0350693322146674	0.887906304213596	0.985457061232426	35.6247428788401	-0.417641138438415	0.121026183342126	0.226762909732355	35.6247428788401	-0.354718766041183	0.200465046539055	0.277094530963593	35.6247428788401	0.0429034166867883	0.866565439179722	NA	35.6247428788401	0.184094127500944
ENSG00000118655.4	DCLRE1B	chr1	114447763	114456708	+	8945	1391	108	47	51.5185185185185	FALSE	47.622886605897	-0.221764299130131	0.465073936239737	0.619882770081642	47.622886605897	-0.0468104439729172	0.876624052727675	0.9432597424082	47.622886605897	-0.09865611027096	0.743839312110122	0.867232084943487	47.622886605897	-0.823391160628005	0.0105285083245436	0.0251104777837233	47.622886605897	0.104966877552501	0.724679340652036	0.920818452696484	47.622886605897	0.0847711905883469	0.774440878553957	0.973158623999101	47.622886605897	-0.118345374428702	0.696346286690071	0.795389177148507	47.622886605897	-0.942581182838933	0.00431115434564453	0.0103134972227704	47.622886605897	0.326731176682632	0.287237513873731	NA	47.622886605897	0.131581634561264
ENSG00000163349.17	HIPK1	chr1	114471814	114520426	+	48612	4560	253	175	168.888888888889	FALSE	162.781443810387	0.074435074661128	0.731261438619918	0.828693628816235	162.781443810387	0.240841996780494	0.26456037451538	0.518117442545235	162.781443810387	0.26128615211806	0.225458345185672	0.441740463952918	162.781443810387	0.106111377442989	0.62696567270719	0.709742932437973	162.781443810387	0.261458505671623	0.224242492168768	0.677243271636226	162.781443810387	0.37431512880033	0.0792973034452319	0.470528410953798	162.781443810387	0.466720725894019	0.0296707880383883	0.0753370207619983	162.781443810387	0.215143064387052	0.32578734084996	0.415101365813536	162.781443810387	0.187023431010495	0.390052249384047	0.728911765171387	162.781443810387	0.133473132019836
ENSG00000197323.6	TRIM33	chr1	114935399	115053781	-	118382	8328	624	296	308.444444444444	TRUE	291.720691311292	-0.505849688163326	0.0167142480213396	0.0844272534203221	291.720691311292	-0.230136029157611	0.273891690617866	0.52653998662766	291.720691311292	0.0843069225819295	0.686713407821163	0.831797783974552	291.720691311292	-0.294437405329322	0.163879120573468	0.246965089538575	291.720691311292	-0.0652898451826903	0.755131425311473	0.93156299096764	291.720691311292	0.0328501299756638	0.874720627821315	0.984517718121247	291.720691311292	-0.0325828855093084	0.876510322770454	0.923449009819416	291.720691311292	-0.25671993646068	0.226562506949205	0.307737881838162	291.720691311292	0.440559842980635	0.0384471589583113	0.46324031649653	291.720691311292	0.262986159133275
ENSG00000116752.5	BCAS2	chr1	115110178	115124260	-	14082	1650	165	49	61.1111111111111	FALSE	55.1455537997882	-0.97342968139876	0.000391949879832211	0.0115665483373773	55.1455537997882	-0.993628873519595	0.000316092287476513	0.0073615330842841	55.1455537997882	-0.913891657611225	0.000844543714842044	0.00760442339685882	55.1455537997882	-1.80386335112251	2.68366903116489e-09	3.91288934713162e-08	55.1455537997882	-0.479231772735815	0.0713333643972212	0.517248164866124	55.1455537997882	0.0442738047441487	0.863697653780466	0.983785848380802	55.1455537997882	-0.51624166167524	0.0542205428959126	0.121639786028138	55.1455537997882	-1.53230594552452	2.9541877394669e-07	1.9887684180458e-06	55.1455537997882	0.494197908662945	0.0808767021300521	NA	55.1455537997882	1.03790267826374
ENSG00000213281.4	NRAS	chr1	115247090	115259515	-	12425	6456	819	172	239.111111111111	TRUE	208.447368119616	-2.18165422872279	0.000701717648858633	0.0164114028698149	208.447368119616	-1.57887265012171	0.0138649550436487	0.0957326262909622	208.447368119616	-0.714918062161822	0.263612153028742	0.485062123136594	208.447368119616	-2.12529558579625	0.000977558475019797	0.00335201805779769	208.447368119616	-1.05934713947596	0.0979115927744657	0.556166245838873	208.447368119616	0.281428232464682	0.659171825640077	0.943692244814843	208.447368119616	-0.435347518399272	0.495801031437216	0.633247956909607	208.447368119616	-1.50178881739167	0.0194559497805176	0.038033557000617	208.447368119616	1.12230708924683	0.0821761276328122	0.509367023683573	208.447368119616	1.86030088258639
ENSG00000009307.11	CSDE1	chr1	115259534	115301297	-	41763	153179	10686	5703	5673.2962962963	FALSE	5440.20046978013	-0.0576919134492015	0.597134493198276	0.729866061997331	5440.20046978013	-0.143306087736728	0.189446839379856	0.43084281207079	5440.20046978013	-0.119066608003317	0.275511306448431	0.49854702386941	5440.20046978013	-0.368736836361819	0.000750697189274401	0.00268636116278136	5440.20046978013	0.0514735641357332	0.637082425520516	0.887445725947347	5440.20046978013	-0.0373717977323701	0.731859215207231	0.962960888294505	5440.20046978013	-0.234579013681519	0.0318016357272849	0.0794533763589486	5440.20046978013	-0.475088429436602	1.45711022843025e-05	6.80906661517543e-05	5440.20046978013	0.109165477584935	0.317744883603251	0.681663019890723	5440.20046978013	0.105934290004358
ENSG00000052723.7	SIKE1	chr1	115312100	115323306	-	11206	2086	138	75	77.2592592592593	FALSE	74.761882088775	-0.0980750941614991	0.57655158199198	0.713608874177663	74.761882088775	-0.0480704459442705	0.784222703201149	0.900059540954222	74.761882088775	0.0532115763744599	0.758501552072589	0.876377333723736	74.761882088775	0.111237558913565	0.527482062689279	0.622049121964351	74.761882088775	-0.0608787059784784	0.726044425632273	0.920939771346742	74.761882088775	0.132554132502397	0.428456927395735	0.87158010938835	74.761882088775	0.10019470221348	0.563484593861276	0.691574810611397	74.761882088775	0.0442080554241266	0.806434651662524	0.850074223024438	74.761882088775	0.0371963881830206	0.838707082928174	NA	74.761882088775	0.180624578446668
ENSG00000173218.10	VANGL1	chr1	116184574	116240845	+	56271	3067	218	113	113.592592592593	FALSE	107.260547656955	-0.108162620534508	0.592524764204313	0.726355193139041	107.260547656955	0.216261426978756	0.27803739168796	0.530371459749784	107.260547656955	-0.208793534420911	0.30479077334011	0.531333622065897	107.260547656955	-0.200687291434915	0.329918054392074	0.43383242403426	107.260547656955	0.106358918447393	0.593976945870158	0.867949693498923	107.260547656955	0.0859144837499196	0.664341446261134	0.945599309822077	107.260547656955	-0.517815722106189	0.0129457794231723	0.0390184614513732	107.260547656955	-0.843948540545324	0.000121585578206105	0.000452088416734731	107.260547656955	0.214521538981901	0.294156853751695	0.664339754245977	107.260547656955	-0.130346943228836
ENSG00000163399.11	ATP1A1	chr1	116915290	116952883	+	37593	46618	2731	1840	1726.59259259259	TRUE	1655.79928587064	-0.448704854047969	0.0881445897588812	0.218071182874614	1655.79928587064	0.121319570034909	0.644324572227048	0.813504726627526	1655.79928587064	0.465240329459288	0.0764653782369397	0.218977123385746	1655.79928587064	0.278536338981186	0.289207940481276	0.38933054571585	1655.79928587064	-0.0776854385852628	0.767577740139361	0.935123054586927	1655.79928587064	0.0846129070926889	0.747351922841573	0.968410754755765	1655.79928587064	0.226158681893147	0.38938860111181	0.535145386886837	1655.79928587064	-0.430959021648219	0.10194062345991	0.156945212141156	1655.79928587064	0.371019415462706	0.158910153562395	0.557178725928149	1655.79928587064	-0.0367066629422199
ENSG00000116815.11	CD58	chr1	117057157	117113661	-	56504	1420	75	54	52.5925925925926	FALSE	51.8970628156203	-0.11237418547078	0.612506064512134	0.742505358459367	51.8970628156203	0.224343166569476	0.297486252827444	0.548916282786741	51.8970628156203	0.112511381833594	0.604254773645839	0.779005237213802	51.8970628156203	0.19897580452106	0.36562441140172	0.470482846785728	51.8970628156203	-0.154254875378969	0.485979339301133	0.823374747691282	51.8970628156203	-0.0284610895028048	0.894444935452891	0.986544920841227	51.8970628156203	0.418864242445071	0.0484400037952633	0.11139778828497	51.8970628156203	0.369163112625242	0.0923987619086788	0.144515856328196	51.8970628156203	-0.0418806899081889	0.857154256152135	NA	51.8970628156203	-0.25280425607228
ENSG00000116830.7	TTF2	chr1	117602925	117650075	+	47150	3733	323	135	138.259259259259	FALSE	129.799563875529	0.149120439208991	0.391966286769886	0.556712294889749	129.799563875529	-0.391518859592703	0.0288940351096237	0.148556026574957	129.799563875529	-0.978540921782389	1.43939878334693e-07	5.04199159191079e-06	129.799563875529	-0.831760345589403	8.66534247937304e-06	5.66105050377236e-05	129.799563875529	0.0644740636255157	0.711732359954828	0.915782849892602	129.799563875529	-0.276220415044844	0.115594560979304	0.552596740556836	129.799563875529	-1.59804000402462	7.72232716989352e-16	5.83713098447127e-14	129.799563875529	-1.1169479077888	9.41995534898746e-09	8.22408867702381e-08	129.799563875529	-0.084646375583475	0.631214267050583	0.866202684969399	129.799563875529	0.115298444547859
ENSG00000198162.8	MAN1A2	chr1	117910071	118071494	+	161423	10096	523	370	373.925925925926	FALSE	370.78466572166	0.05661734298452	0.718994759465219	0.820497661543079	370.78466572166	-0.0885703968163655	0.575920352334897	0.769769765172919	370.78466572166	0.362850004959776	0.0201103485980676	0.0857027071560577	370.78466572166	0.617510608538714	7.49564398142957e-05	0.000369507804279054	370.78466572166	0.0246469342922496	0.875497673248329	0.969562196424733	370.78466572166	0.22521294669145	0.147860107674429	0.611964720379711	370.78466572166	0.640482710274387	3.72596835127177e-05	0.000292944062800263	370.78466572166	0.557725694099776	0.000380593165656495	0.00123944493895012	370.78466572166	-0.0319704086922704	0.840578422652427	0.948860733683429	370.78466572166	0.313783343507815
ENSG00000196505.6	GDAP2	chr1	118406107	118472253	-	66146	1652	93	61	61.1851851851852	FALSE	60.319826146314	0.456863844001639	0.0429913988205829	0.141807733524771	60.319826146314	0.252568506125578	0.271835993809583	0.523829801124278	60.319826146314	0.366848776994694	0.10677313832374	0.273372776859235	60.319826146314	0.534824750076256	0.0190826547570809	0.0416397153815565	60.319826146314	0.142549319388028	0.53541756780264	0.846743804197037	60.319826146314	0.202887237143287	0.36906806178729	0.83978333467681	60.319826146314	0.147048776292608	0.527053397137682	0.660407026775543	60.319826146314	-0.0842923706583379	0.730149422042235	0.788630931278257	60.319826146314	-0.314314524613611	0.171699397856975	NA	60.319826146314	-0.0496812689822912
ENSG00000065183.11	WDR3	chr1	118472343	118509165	+	36822	5532	452	184	204.888888888889	FALSE	193.560010361544	-0.0157567178748253	0.911776032427609	0.946143313033322	193.560010361544	-0.334856228385036	0.021126653952322	0.1251135540164	193.560010361544	-0.347834661125937	0.0165202501359746	0.0740275587216291	193.560010361544	-0.521231722480083	0.000471831600859766	0.00179742391892511	193.560010361544	-0.0269749141293198	0.849284389729523	0.963355183479691	193.560010361544	-0.0705643515129911	0.616521915366611	0.934212023933782	193.560010361544	-0.467612625733109	0.00145487588955555	0.00651021396148702	193.560010361544	-0.700097356142457	5.02051643248827e-06	2.58588105790505e-05	193.560010361544	-0.0112181962544945	0.938258523507501	0.982090285151054	193.560010361544	0.264291876872045
ENSG00000116874.7	WARS2	chr1	119573839	119683294	-	109455	1921	108	70	71.1481481481482	FALSE	69.1528364378213	0.0643000350612577	0.761544894660092	0.849783070098774	69.1528364378213	0.181812477594219	0.388108386990945	0.631477258346003	69.1528364378213	0.313357807864009	0.132071262511781	0.314815510114527	69.1528364378213	-0.138595085126343	0.530041978677646	0.624128413537206	69.1528364378213	0.138284428910356	0.509603330244444	0.833009136967363	69.1528364378213	0.233110415400264	0.256386669815081	0.757466546253212	69.1528364378213	0.706440861410457	0.000517424359420619	0.00270713157566938	69.1528364378213	0.0983069821724846	0.653141377956049	0.723873859015726	69.1528364378213	0.0739843938490983	0.731666629319566	NA	69.1528364378213	0.0512979378060447
ENSG00000143067.4	ZNF697	chr1	120162045	120190396	-	28351	1080	71	38	40	FALSE	39.5032286525143	0.0355115041595162	0.902527641602096	0.940737956657223	39.5032286525143	-0.047515189083211	0.871300683905436	0.941087740437847	39.5032286525143	0.480869147018653	0.0867055574743959	0.237403411056159	39.5032286525143	1.15065278378855	2.52917788609081e-05	0.000142329238112985	39.5032286525143	0.133282886257541	0.641633151330129	0.890175608097249	39.5032286525143	0.0366730297046022	0.897365248030716	0.987189356991108	39.5032286525143	0.0729246467020372	0.802211750809401	0.871570598124769	39.5032286525143	0.244051929431919	0.40728412361277	0.49979596883669	39.5032286525143	0.0977713820980244	0.740591935523368	NA	39.5032286525143	0.0841882187878132
ENSG00000092621.7	PHGDH	chr1	120202421	120286838	+	84417	2984	236	93	110.518518518519	FALSE	104.744957367223	0.141687704129075	0.409285138413596	0.570127713823142	104.744957367223	-0.900934560383778	1.19333277371568e-06	6.99520306878097e-05	104.744957367223	-1.25082151205535	6.71118265663378e-11	5.02871834367072e-09	104.744957367223	-1.12710822880036	5.78514621506254e-09	7.88775394544207e-08	104.744957367223	0.236567714218918	0.165334988248464	0.63517235565627	104.744957367223	-0.550682852092679	0.00178417027632012	0.0416851328906876	104.744957367223	-0.657505464215642	0.000306287699026883	0.001727278208452	104.744957367223	-0.787573116225966	3.27718403702067e-05	0.000140285617719856	104.744957367223	0.0948800100898431	0.583293245359558	0.841851069325217	104.744957367223	0.350251708291099
[truncated: 8,107 more rows]
[truncated: 13 more columns]
